# Supplementary material for: Molecular Matchmakers: Phytoplasma Effector SAP54 Targets MADS-Box Factor SVP to Enhance Attraction of Fecund Female Vectors by Modulating Leaf Responses to Male Presence
Source: bioRxiv preprint, doi:10.1101/2024.05.09.593434, version 2 (2024-09-18)
Supplement: Supplementary file 1 [file 593434_file19.xlsx]

## Sheet: Title Page + legend
Supplementary Table 1: FPKM and differential expression values of 17'153 genes included in the response analyses of plants to SAP54 vs GFP and male vs female leafhopper exposure.
Tab A: average FPKM for ALL transcripts with at leats 2 replicates displaying > or = 1FPKM in at least 1 treatment out of 6
Tab A: log2(fold change) for genes in insect exposed SAP54 and GFP plants displayed in Supplemental figure 4B

## Sheet: A
average FPKM for ALL transcripts with at leats 2 replicates displaying > or = 1FPKM in at least 1 treatment out of 6
GENE ID	F_G	M_G	N_G	F_S	M_S	N_S
AT3G48550	1.07516	0.862839	0.838635	1.02632	0.737019	0.964708
AT1G16640	1.07552	0.863176	0.838963	1.02677	0.737356	0.965003
AT4G01680	1.07588	0.863484	0.839279	1.02713	0.737751	0.965224
AT3G25250	1.0764	0.863683	0.839773	1.02806	0.737834	0.965639
AT1G50910	1.07658	0.863966	0.839883	1.02827	0.738098	0.965878
AT5G03700	1.07702	0.86437	0.840165	1.02841	0.738606	0.965955
AT2G45100	1.0774	0.864786	0.840892	1.02846	0.738984	0.967048
AT5G45140	1.07793	0.865183	0.841341	1.02868	0.739165	0.967407
AT1G30720	1.07835	0.86542	0.841792	1.02923	0.739654	0.967911
AT2G05160	1.07858	0.866334	0.841966	1.02962	0.74009	0.968517
AT2G28590	1.07903	0.8666	0.842906	1.02979	0.740529	0.969184
AT5G67470	1.07941	0.86681	0.843132	1.02995	0.740845	0.969738
AT1G01760	1.07958	0.86704	0.843646	1.03038	0.741141	0.970296
AT2G34140	1.07975	0.867439	0.844088	1.03057	0.741263	0.970537
AT3G48150	1.08016	0.867934	0.844818	1.03098	0.741909	0.971244
AT1G61280	1.08109	0.868552	0.845235	1.0315	0.742157	0.971646
AT5G61160	1.08151	0.868877	0.845728	1.03194	0.742298	0.972097
AT5G05680	1.08208	0.869177	0.846476	1.03231	0.742503	0.972375
AT5G28262	1.08268	0.869327	0.846729	1.03256	0.742882	0.972644
AT1G68725	1.08347	0.869715	0.847077	1.03266	0.743381	0.972875
AT5G10260	1.08409	0.869922	0.84757	1.03301	0.743524	0.973506
AT2G05950	1.08436	0.870631	0.848004	1.03344	0.743801	0.973874
AT3G01750	1.08457	0.870885	0.848425	1.03389	0.744149	0.973986
AT1G52990	1.08528	0.871146	0.848978	1.03415	0.744911	0.974354
AT3G47890	1.08573	0.871484	0.849325	1.03463	0.745786	0.974563
AT2G45685	1.08633	0.871662	0.849861	1.03531	0.745997	0.975631
AT3G60220	1.08695	0.872026	0.850124	1.03553	0.746107	0.976022
AT5G50090	1.08739	0.872274	0.850421	1.03574	0.746585	0.976162
AT5G11020	1.08753	0.87281	0.850537	1.03628	0.747241	0.976315
AT5G42040	1.08869	0.873178	0.851059	1.03669	0.747507	0.976621
AT4G36030	1.08934	0.873632	0.85112	1.03695	0.747684	0.977107
AT2G40711	1.08989	0.874096	0.851423	1.03755	0.747875	0.977342
AT3G20490	1.09063	0.874726	0.852032	1.03808	0.748119	0.977669
AT5G47800	1.09082	0.87491	0.852316	1.03863	0.748653	0.97822
AT3G28925	1.09103	0.875097	0.852581	1.03878	0.748786	0.978639
AT1G15480	1.09147	0.875368	0.852826	1.03914	0.749119	0.979775
AT5G13830	1.09211	0.876197	0.853037	1.03972	0.749563	0.979939
AT3G09375	1.09257	0.876493	0.853295	1.04046	0.749653	0.980389
AT1G70020	1.09357	0.876853	0.85374	1.04089	0.749995	0.981034
AT5G09976	1.09396	0.877679	0.854015	1.04186	0.750277	0.981367
AT5G23000	1.09413	0.878258	0.854302	1.04228	0.750545	0.981518
AT1G58250	1.09514	0.878428	0.854386	1.04233	0.751146	0.982395
AT1G09680	1.09593	0.878837	0.854667	1.04279	0.751321	0.982565
AT3G07210	1.09631	0.879438	0.855023	1.04309	0.751552	0.983375
AT5G63550	1.09682	0.880161	0.855137	1.04338	0.751774	0.983557
AT4G38560	1.09702	0.880485	0.855213	1.04372	0.752059	0.984074
AT1G78090	1.0978	0.880968	0.855625	1.04407	0.752627	0.984433
AT1G02050	1.09816	0.881237	0.856145	1.04464	0.752774	0.985633
AT4G31890	1.09868	0.88133	0.856476	1.04516	0.753142	0.986
AT2G25460	1.09889	0.881503	0.856978	1.04558	0.753677	0.986143
AT1G61500	1.09924	0.881656	0.857548	1.0461	0.753944	0.986976
AT3G10070	1.09989	0.881879	0.857858	1.04663	0.754655	0.987463
AT3G07980	1.1004	0.882506	0.858467	1.04698	0.754946	0.987586
AT1G19950	1.10176	0.882603	0.858725	1.04765	0.755227	0.987906
AT3G54930	1.10261	0.883041	0.859195	1.04797	0.755913	0.988248
AT3G54180	1.10349	0.883449	0.859476	1.04825	0.756527	0.989143
AT5G59680	1.10385	0.883937	0.859883	1.04866	0.757003	0.989302
AT5G65180	1.10414	0.88414	0.860655	1.04897	0.757396	0.989809
AT4G20910	1.10431	0.884409	0.8613	1.04915	0.757769	0.989871
AT1G17850	1.10463	0.884702	0.861695	1.04958	0.757957	0.990028
AT2G36307	1.10551	0.885074	0.861858	1.04988	0.758271	0.990104
AT3G20340	1.10601	0.885281	0.862387	1.05027	0.758793	0.990633
AT1G61690	1.10652	0.885719	0.86308	1.05105	0.759069	0.991165
AT1G17560	1.10691	0.885962	0.863471	1.05141	0.759447	0.991547
AT2G41830	1.10767	0.88619	0.863834	1.05168	0.759606	0.991841
AT5G02400	1.10835	0.886637	0.864112	1.05194	0.759824	0.992112
AT1G11520	1.10871	0.886983	0.864609	1.0525	0.760309	0.992346
AT1G61260	1.10904	0.887787	0.864948	1.05277	0.760795	0.992872
AT1G17580	1.10938	0.888066	0.865218	1.05364	0.761104	0.993705
AT4G30570	1.11051	0.888154	0.865607	1.05397	0.761193	0.994337
AT5G02440	1.11099	0.88828	0.865971	1.05421	0.761348	0.994713
AT1G14480	1.11171	0.888737	0.86658	1.0544	0.761644	0.994785
AT4G03376	1.1122	0.889231	0.866902	1.0546	0.761824	0.995356
AT5G03450	1.11272	0.889558	0.867182	1.05529	0.762418	0.995672
AT1G01225	1.11325	0.889938	0.868053	1.05551	0.762705	0.996996
AT3G16980	1.11374	0.890149	0.868247	1.05571	0.762897	0.997182
AT1G19340	1.11408	0.890242	0.868534	1.05604	0.763065	0.997508
AT1G12890	1.1144	0.890806	0.868649	1.05639	0.763569	0.997955
AT1G03270	1.11474	0.890938	0.868838	1.05671	0.764235	0.999477
AT3G60961	1.11508	0.891177	0.869258	1.0571	0.764379	1.00015
AT2G28670	1.11543	0.891428	0.86963	1.05759	0.765158	1.00048
AT1G13940	1.11597	0.891677	0.870235	1.05797	0.765648	1.00055
AT3G49730	1.11641	0.891913	0.870349	1.05855	0.766014	1.00064
AT1G05670	1.1168	0.892216	0.870863	1.05884	0.766246	1.00108
AT5G23430	1.11719	0.8923	0.871318	1.05929	0.766599	1.00115
AT1G19025	1.11788	0.892891	0.872028	1.05997	0.766845	1.00129
AT2G16750	1.11816	0.893305	0.872356	1.06014	0.767041	1.00175
AT1G63295	1.11864	0.893763	0.873144	1.06078	0.767094	1.00191
AT3G55090	1.11877	0.894149	0.873285	1.06117	0.767304	1.00204
AT5G43840	1.1194	0.894976	0.873662	1.06208	0.767981	1.00207
AT2G23620	1.12037	0.895361	0.873685	1.06222	0.768362	1.00328
AT2G34780	1.12066	0.895645	0.873929	1.06243	0.768648	1.00347
AT5G08391	1.12115	0.896775	0.874347	1.06303	0.769057	1.00371
AT2G29580	1.12177	0.897186	0.874756	1.06332	0.769839	1.00415
AT2G25500	1.12227	0.897683	0.875108	1.06382	0.769949	1.00462
AT3G17220	1.12247	0.89824	0.875559	1.06418	0.770189	1.0052
AT1G05800	1.12265	0.898382	0.87582	1.0645	0.770338	1.00563
AT2G24870	1.12283	0.898529	0.876364	1.06499	0.770604	1.00704
AT5G49665	1.12329	0.898715	0.877077	1.06541	0.77076	1.00768
AT3G14120	1.12361	0.899176	0.877204	1.06595	0.771086	1.00799
AT3G11570	1.12487	0.899539	0.877525	1.06638	0.771559	1.00854
AT5G23770	1.12536	0.900065	0.878247	1.06691	0.77205	1.00914
AT3G48810	1.12573	0.900453	0.878421	1.06742	0.772625	1.00938
AT3G61185	1.12646	0.90098	0.878709	1.06788	0.772862	1.00963
AT1G62835	1.12688	0.901547	0.879216	1.06872	0.773263	1.01017
AT1G70560	1.12715	0.902029	0.879711	1.06882	0.773621	1.01091
AT4G36060	1.12797	0.902358	0.880431	1.06957	0.774052	1.01152
AT4G21926	1.12836	0.902808	0.880605	1.07024	0.775317	1.01263
AT5G54850	1.12906	0.903074	0.880783	1.0708	0.775575	1.01326
AT1G12775	1.12947	0.903461	0.880873	1.07152	0.775876	1.01354
AT5G25090	1.13026	0.90389	0.881253	1.07175	0.776261	1.01384
AT1G25540	1.13061	0.904399	0.88151	1.07197	0.777213	1.0148
AT5G25830	1.13115	0.904822	0.881779	1.07218	0.777687	1.01541
AT3G06830	1.13142	0.905326	0.88224	1.07305	0.777912	1.016
AT3G51910	1.13168	0.905486	0.882552	1.07384	0.778068	1.01647
AT1G64760	1.1319	0.906025	0.883045	1.07456	0.778638	1.01704
AT5G44040	1.13253	0.90641	0.883486	1.07535	0.779214	1.01736
AT1G27460	1.13297	0.906635	0.883781	1.07558	0.779661	1.01758
AT1G11570	1.13417	0.907306	0.884287	1.07578	0.780383	1.0178
AT5G18930	1.13457	0.908276	0.884447	1.07633	0.78055	1.01816
AT2G41960	1.13484	0.908703	0.884828	1.07681	0.780825	1.0194
AT1G69950	1.13562	0.90898	0.885103	1.07746	0.781048	1.01975
AT5G55470	1.13628	0.909608	0.885359	1.07788	0.781483	1.02057
AT1G06590	1.13681	0.909759	0.885565	1.07834	0.78198	1.02109
AT5G37410	1.13696	0.91048	0.886167	1.07856	0.782367	1.02141
AT1G06580	1.13735	0.910781	0.886445	1.07944	0.782522	1.02166
AT2G36355	1.1384	0.911273	0.886998	1.08011	0.783105	1.02283
AT5G07620	1.13907	0.911379	0.887459	1.08093	0.783309	1.02326
AT2G19250	1.13934	0.911498	0.887736	1.08151	0.783525	1.02388
AT3G48390	1.13961	0.911821	0.887835	1.08183	0.784187	1.02487
AT1G72200	1.14006	0.912488	0.888632	1.08236	0.784498	1.02545
AT3G59290	1.14025	0.912689	0.889239	1.08264	0.784553	1.02576
AT5G24920	1.1406	0.912814	0.889386	1.0831	0.784866	1.02673
AT4G17330	1.14081	0.913146	0.88956	1.08397	0.785162	1.02779
AT5G45330	1.14109	0.913449	0.889942	1.08417	0.785596	1.02798
AT1G63860	1.14151	0.91367	0.890481	1.08444	0.786015	1.02818
AT2G34500	1.14204	0.914068	0.891118	1.08486	0.786223	1.02844
AT5G61200	1.14251	0.914231	0.891314	1.08515	0.78661	1.02852
AT1G70885	1.14286	0.91502	0.891845	1.08548	0.786943	1.02888
AT3G49690	1.14357	0.915112	0.892595	1.08607	0.787486	1.02909
AT5G64640	1.14462	0.915831	0.893348	1.08634	0.787791	1.02931
AT1G53680	1.14513	0.915962	0.893758	1.08699	0.788095	1.02993
AT1G10160	1.1457	0.916689	0.89392	1.08748	0.788453	1.03044
AT5G04890	1.14588	0.917155	0.894583	1.08762	0.788831	1.03086
AT4G12010	1.14613	0.917641	0.894878	1.0881	0.789156	1.0311
AT4G21903	1.14673	0.918003	0.895274	1.08872	0.789461	1.03244
AT2G36970	1.14707	0.918864	0.895631	1.0893	0.790268	1.03311
AT4G17240	1.14818	0.919041	0.896053	1.0899	0.790486	1.03367
AT4G22280	1.14924	0.919516	0.8966	1.09024	0.790677	1.03459
AT1G76540	1.14969	0.919771	0.896943	1.09084	0.791243	1.03512
AT1G08300	1.15028	0.920027	0.897157	1.09146	0.79162	1.03551
AT3G59690	1.15086	0.920523	0.897379	1.09192	0.791754	1.03586
AT1G61970	1.15152	0.920915	0.897687	1.09261	0.791916	1.03641
AT4G13330	1.15196	0.921284	0.898223	1.09287	0.79226	1.03702
AT1G60505	1.15228	0.921677	0.899084	1.09298	0.792491	1.0373
AT4G39600	1.15281	0.922069	0.899328	1.09332	0.793068	1.0378
AT3G60310	1.15322	0.922567	0.899727	1.09364	0.793556	1.03807
AT3G02500	1.15392	0.922901	0.900095	1.09388	0.79379	1.03829
AT2G07799	1.15427	0.92343	0.900436	1.09421	0.793938	1.03927
AT4G19865	1.1549	0.923693	0.901353	1.09456	0.794397	1.0394
AT3G53860	1.155	0.924163	0.901699	1.09483	0.794917	1.03967
AT1G10450	1.15568	0.92448	0.902282	1.09529	0.795365	1.03978
AT1G74180	1.1561	0.925181	0.902782	1.09544	0.795616	1.04034
AT3G48410	1.15651	0.925354	0.903222	1.09592	0.795992	1.04108
AT5G24970	1.15711	0.925878	0.903529	1.09677	0.796303	1.04159
AT1G73602	1.15781	0.925936	0.903883	1.0976	0.796525	1.04254
AT1G75190	1.15797	0.926617	0.9045	1.09809	0.797207	1.04276
AT2G13130	1.15845	0.926713	0.905269	1.09875	0.79735	1.04289
AT1G16710	1.15929	0.926877	0.906005	1.09946	0.797672	1.0433
AT3G57350	1.15939	0.92758	0.906532	1.09997	0.798069	1.04408
AT1G79950	1.16012	0.928038	0.906893	1.1004	0.798359	1.04462
AT2G35110	1.16063	0.928462	0.907717	1.10121	0.799036	1.04495
AT5G62520	1.16132	0.928845	0.90799	1.10204	0.79914	1.04552
AT5G51670	1.16157	0.92924	0.908497	1.1024	0.79924	1.04608
AT1G79150	1.16181	0.929696	0.908953	1.10272	0.799562	1.04625
AT4G03811	1.16231	0.930348	0.910068	1.10312	0.79966	1.04632
AT1G20930	1.16344	0.930775	0.910393	1.1035	0.800223	1.04648
AT1G33800	1.16427	0.93123	0.910844	1.10383	0.800712	1.04685
AT4G01740	1.16456	0.931302	0.911272	1.1046	0.801019	1.0471
AT4G13660	1.16479	0.931654	0.91197	1.10535	0.801826	1.04744
AT3G25980	1.16518	0.932024	0.912278	1.10574	0.802067	1.04763
AT1G23230	1.16524	0.932589	0.912585	1.10643	0.802331	1.04801
AT1G06150	1.16568	0.932932	0.913184	1.10692	0.803038	1.04844
AT4G28700	1.16593	0.933422	0.91398	1.10742	0.803162	1.04889
AT2G44580	1.1663	0.933482	0.914726	1.10816	0.803403	1.04903
AT1G43886	1.16643	0.933729	0.915185	1.10825	0.803566	1.04946
AT5G64980	1.16678	0.934023	0.915898	1.10876	0.804237	1.04985
AT5G12100	1.16699	0.934449	0.916458	1.10891	0.804786	1.05091
AT2G37100	1.16744	0.934697	0.916992	1.10944	0.805079	1.05168
AT1G06265	1.16796	0.935061	0.917353	1.11004	0.80539	1.05179
AT1G37150	1.16835	0.935172	0.91764	1.11042	0.805856	1.05273
AT4G20000	1.169	0.935692	0.918214	1.11101	0.806394	1.05302
AT2G05914	1.16929	0.935968	0.918565	1.11122	0.806698	1.05389
AT1G68850	1.17022	0.936497	0.919078	1.11176	0.806797	1.05456
AT5G50315	1.17072	0.937239	0.919427	1.112	0.807009	1.05564
AT1G53887	1.17103	0.937762	0.919854	1.11231	0.807153	1.05578
AT1G68350	1.17176	0.938041	0.920138	1.11248	0.807341	1.05604
AT3G42725	1.17223	0.938515	0.920821	1.11332	0.807678	1.05632
AT2G34340	1.17266	0.939217	0.921403	1.1139	0.807993	1.05698
AT5G58520	1.17311	0.939891	0.922143	1.11436	0.808098	1.05792
AT2G19950	1.1736	0.940279	0.922937	1.11476	0.808585	1.05858
AT1G72140	1.17409	0.940597	0.924191	1.11528	0.808921	1.05967
AT2G16870	1.17474	0.94076	0.924492	1.11594	0.809487	1.06007
AT2G05910	1.1752	0.941626	0.925646	1.11645	0.809859	1.06059
AT3G12915	1.17563	0.941925	0.925798	1.11699	0.810172	1.0609
AT1G68470	1.1763	0.942322	0.926038	1.11753	0.810653	1.06139
ATCG00340	1.17704	0.942943	0.926591	1.11778	0.810772	1.06185
AT1G24265	1.17738	0.943209	0.926839	1.11866	0.811034	1.06229
AT1G23465	1.17811	0.943528	0.927529	1.11922	0.811301	1.06334
AT1G18620	1.17878	0.944023	0.927844	1.11952	0.811443	1.06367
AT1G11572	1.17895	0.944273	0.928283	1.11989	0.811689	1.06449
AT1G53520	1.17938	0.944447	0.928947	1.12049	0.811785	1.0651
AT1G64600	1.18004	0.944785	0.929223	1.12087	0.812118	1.06543
AT2G46180	1.18114	0.945015	0.929584	1.12114	0.812445	1.06654
AT2G17780	1.18156	0.945152	0.930807	1.12151	0.812786	1.06696
AT4G14590	1.18185	0.945686	0.931205	1.12178	0.813288	1.06762
AT1G64270	1.18274	0.946295	0.931507	1.12232	0.813688	1.06791
AT4G20350	1.18332	0.946549	0.931998	1.12253	0.814167	1.06829
AT1G14850	1.18352	0.94698	0.932557	1.12358	0.814453	1.06849
AT5G42350	1.18416	0.947182	0.933196	1.12445	0.814632	1.06882
AT5G05965	1.18455	0.947362	0.933992	1.12484	0.815353	1.06941
AT1G45120	1.18497	0.947756	0.934481	1.12521	0.815776	1.0696
AT2G35630	1.18504	0.948438	0.935062	1.12537	0.816331	1.07031
AT4G02100	1.18535	0.94901	0.935482	1.12579	0.816531	1.07061
AT1G65900	1.18556	0.949638	0.935961	1.12628	0.816659	1.0715
AT4G20325	1.18596	0.950131	0.936265	1.12657	0.816779	1.07175
AT1G64960	1.18622	0.950409	0.936331	1.12743	0.817028	1.07237
AT4G02320	1.18674	0.95117	0.936492	1.12813	0.817133	1.07415
AT2G30500	1.18691	0.951554	0.936725	1.12865	0.817233	1.07441
AT5G18525	1.18731	0.95191	0.937167	1.1291	0.817658	1.07479
AT3G48430	1.18792	0.952272	0.937483	1.12946	0.817786	1.07523
AT5G52220	1.18886	0.952864	0.937722	1.1302	0.818053	1.07534
AT5G16780	1.18998	0.953285	0.938874	1.13062	0.818409	1.07557
AT5G43570	1.19057	0.953911	0.939412	1.13111	0.818628	1.07597
AT1G24577	1.19111	0.955036	0.93973	1.13149	0.81887	1.07631
AT1G26380	1.19151	0.955395	0.940106	1.13233	0.819149	1.07733
AT3G53403	1.19177	0.955854	0.940413	1.13303	0.81935	1.07834
AT2G26220	1.19225	0.956616	0.941045	1.13369	0.819548	1.07914
AT5G51680	1.19302	0.957233	0.941416	1.13387	0.820028	1.07947
AT1G52270	1.19361	0.957979	0.941933	1.13444	0.820158	1.07988
AT1G11190	1.19416	0.958141	0.942167	1.1351	0.820326	1.08079
AT3G24929	1.19484	0.958363	0.942575	1.13563	0.820577	1.08156
AT3G52310	1.19532	0.958494	0.943041	1.13633	0.821535	1.0822
AT5G61140	1.19598	0.958997	0.943515	1.13694	0.822003	1.08261
AT4G32620	1.1962	0.959895	0.943871	1.13743	0.822166	1.08311
AT1G09800	1.19677	0.960414	0.944796	1.1378	0.823017	1.08338
AT3G52605	1.19724	0.960647	0.944997	1.13794	0.823215	1.08392
AT5G41080	1.19811	0.961016	0.94541	1.1381	0.823733	1.08441
AT5G51580	1.19934	0.961321	0.945706	1.13904	0.824038	1.08489
AT5G44910	1.19986	0.96172	0.945983	1.13966	0.824239	1.08559
AT1G74750	1.2003	0.962525	0.946416	1.13997	0.824596	1.08597
AT1G62860	1.20181	0.963195	0.946743	1.1402	0.824922	1.08636
AT3G06433	1.20224	0.963309	0.947003	1.14067	0.825276	1.08672
AT4G21880	1.20262	0.964461	0.947342	1.14111	0.825687	1.08694
AT5G04240	1.20282	0.964761	0.947548	1.14184	0.825827	1.0871
AT3G01320	1.20379	0.965452	0.9479	1.14235	0.826027	1.08764
AT5G66350	1.20392	0.966006	0.948191	1.14279	0.826264	1.08825
AT2G29125	1.20432	0.966374	0.948417	1.14328	0.826526	1.08863
AT1G09575	1.20483	0.967148	0.949003	1.14357	0.826931	1.08897
AT3G60860	1.20552	0.967712	0.949602	1.14456	0.82718	1.08962
AT1G14460	1.20609	0.968206	0.949867	1.14486	0.827528	1.08995
AT4G36150	1.20667	0.968554	0.950377	1.14504	0.828107	1.09028
AT3G23260	1.20697	0.968977	0.950876	1.14519	0.828547	1.09091
AT4G28070	1.20717	0.97003	0.95109	1.14572	0.829091	1.09117
AT2G03850	1.20766	0.970477	0.951417	1.14668	0.829486	1.09199
AT1G25530	1.20791	0.970928	0.951567	1.14726	0.829665	1.09273
AT5G56540	1.20815	0.971379	0.951754	1.14781	0.830122	1.09298
AT1G22330	1.20845	0.971762	0.952621	1.14804	0.830339	1.09385
AT3G14700	1.20886	0.972781	0.953116	1.14829	0.830556	1.09519
AT2G34440	1.20958	0.973154	0.953824	1.14933	0.83089	1.09625
AT3G25905	1.20986	0.973359	0.95426	1.14961	0.831169	1.09679
AT5G58300	1.21029	0.973523	0.954456	1.1498	0.831801	1.09731
AT2G21540	1.21099	0.974324	0.954815	1.15043	0.832429	1.09761
AT1G07290	1.21124	0.974832	0.95565	1.15117	0.832773	1.09782
AT1G76170	1.21196	0.975434	0.955779	1.15159	0.833063	1.09925
AT5G03377	1.2124	0.975618	0.956083	1.15225	0.833363	1.09947
AT1G24460	1.21256	0.976057	0.95652	1.15244	0.833494	1.10001
AT5G20540	1.21312	0.976267	0.95691	1.15309	0.833672	1.10028
AT5G25010	1.21335	0.976468	0.957071	1.15382	0.83453	1.101
AT4G25692	1.21348	0.976866	0.95732	1.15397	0.835087	1.10142
AT3G48630	1.21352	0.977287	0.957617	1.15421	0.835797	1.10201
AT3G59710	1.21416	0.977643	0.957826	1.15468	0.835962	1.10205
AT4G37110	1.2146	0.978069	0.958166	1.15518	0.836431	1.10272
AT1G67980	1.2148	0.97839	0.958776	1.15578	0.83692	1.10398
AT5G58600	1.21548	0.978818	0.959132	1.15612	0.837269	1.1043
AT3G04060	1.21612	0.979226	0.959882	1.15695	0.837669	1.10458
AT1G01040	1.21638	0.979515	0.960384	1.15711	0.837749	1.10533
AT3G46690	1.2172	0.97985	0.960721	1.15742	0.838102	1.10565
AT5G15680	1.21761	0.980291	0.96158	1.15808	0.838279	1.10604
AT4G02900	1.21819	0.980817	0.962168	1.15853	0.838703	1.1063
AT2G25480	1.21871	0.98114	0.962428	1.15888	0.839104	1.10666
AT1G63250	1.21921	0.981455	0.962944	1.15957	0.839412	1.10713
AT5G06620	1.22006	0.98156	0.963122	1.15971	0.839778	1.10781
AT5G65170	1.22051	0.982112	0.963786	1.16013	0.839943	1.10835
AT3G17740	1.22129	0.982297	0.964245	1.16051	0.840855	1.10849
AT5G39330	1.22142	0.982457	0.964623	1.16108	0.841349	1.10877
AT1G68890	1.22248	0.982618	0.964692	1.16124	0.841484	1.10899
AT2G35290	1.22299	0.982884	0.964877	1.16143	0.841725	1.10988
AT4G13320	1.22326	0.983413	0.965161	1.1619	0.84219	1.11024
AT4G23150	1.2237	0.983824	0.965412	1.16219	0.842413	1.1109
AT5G18820	1.22408	0.984378	0.965882	1.16343	0.84255	1.11151
AT3G42806	1.22449	0.984748	0.966355	1.1641	0.843017	1.11285
AT1G74030	1.22488	0.985358	0.966928	1.16488	0.843138	1.11366
AT5G10970	1.22548	0.985837	0.96717	1.16553	0.843557	1.11417
AT1G12700	1.226	0.986049	0.967518	1.16599	0.84368	1.11521
AT5G51795	1.22633	0.987024	0.96796	1.16625	0.844216	1.11593
AT3G09190	1.22673	0.987721	0.968248	1.16665	0.84445	1.11615
AT3G25620	1.22715	0.988089	0.968622	1.16698	0.844944	1.11629
AT2G39850	1.22769	0.989675	0.969754	1.16751	0.845691	1.11654
AT2G45870	1.22778	0.989972	0.970167	1.16789	0.846223	1.11673
AT5G46130	1.22924	0.990312	0.970704	1.1683	0.846468	1.1171
AT4G16310	1.22944	0.990682	0.971491	1.16861	0.846871	1.11803
AT3G12110	1.2303	0.99156	0.971866	1.16891	0.847316	1.11898
AT3G19080	1.2305	0.991818	0.972307	1.16925	0.847538	1.11963
AT3G26134	1.23091	0.992306	0.973038	1.16997	0.847918	1.12041
AT5G57567	1.23133	0.992658	0.973289	1.17046	0.848247	1.12085
AT1G32960	1.23179	0.99283	0.973495	1.17088	0.848368	1.12166
AT2G47410	1.2321	0.992997	0.973823	1.17114	0.848932	1.12203
AT1G74390	1.23248	0.993206	0.974055	1.17162	0.849148	1.1225
AT1G72970	1.23326	0.993506	0.97458	1.17215	0.8498	1.1232
AT3G60200	1.23393	0.99371	0.974716	1.17267	0.849941	1.12323
AT1G10460	1.23433	0.994565	0.975268	1.17291	0.850039	1.12347
AT1G58230	1.23511	0.995172	0.975402	1.17332	0.850636	1.12377
AT3G11340	1.23575	0.995483	0.975773	1.17358	0.850826	1.12426
AT3G26816	1.23625	0.995971	0.976211	1.17394	0.851247	1.12484
AT2G47200	1.23677	0.996101	0.976611	1.17434	0.851526	1.12535
AT4G33610	1.23725	0.996296	0.977153	1.17477	0.851884	1.12571
AT5G59580	1.23817	0.99714	0.977407	1.17522	0.852239	1.12689
AT3G25440	1.23856	0.997609	0.97756	1.17577	0.852517	1.12741
AT1G77640	1.23917	0.997801	0.97822	1.17688	0.852788	1.12755
AT4G33130	1.23961	0.997965	0.978827	1.17748	0.853552	1.12795
AT1G77960	1.24016	0.998354	0.979204	1.17789	0.853934	1.1285
AT3G11440	1.24031	0.998724	0.979545	1.17844	0.854272	1.12876
AT5G37260	1.2411	0.999109	0.980031	1.17894	0.854619	1.12958
AT5G59845	1.24152	0.999246	0.980489	1.17908	0.855128	1.12989
AT1G49490	1.24192	0.999694	0.980979	1.17976	0.855614	1.12998
AT5G16230	1.24212	1.00003	0.981397	1.18006	0.85593	1.13103
AT3G62780	1.24255	1.00046	0.981579	1.18031	0.856066	1.13252
AT1G21580	1.2432	1.00074	0.982341	1.18071	0.856465	1.13287
AT1G08270	1.244	1.00093	0.983072	1.1814	0.856715	1.13323
AT4G38480	1.24456	1.00161	0.983625	1.18209	0.85723	1.1333
AT3G47580	1.24496	1.00226	0.984247	1.18238	0.857785	1.13391
AT3G59890	1.24526	1.00299	0.984475	1.18281	0.858146	1.13457
AT2G26710	1.24548	1.00351	0.984681	1.18336	0.858313	1.13496
AT5G56300	1.24591	1.00366	0.985146	1.18383	0.859204	1.13541
AT4G35070	1.24623	1.00425	0.985297	1.18477	0.859578	1.13655
AT1G73450	1.24663	1.00474	0.985918	1.18541	0.860536	1.13686
AT4G25610	1.24708	1.0051	0.986679	1.18621	0.861108	1.13719
AT1G10040	1.24786	1.00549	0.987221	1.18675	0.861717	1.13773
AT4G21530	1.24825	1.00599	0.987942	1.18718	0.861922	1.13831
AT1G30610	1.24866	1.00658	0.988308	1.18742	0.862227	1.13893
AT2G20835	1.24907	1.00697	0.988453	1.18781	0.862403	1.13955
AT1G52910	1.24945	1.00747	0.98934	1.18798	0.862794	1.14011
AT1G15580	1.24986	1.00793	0.989829	1.18915	0.863204	1.14045
AT4G28230	1.25029	1.00812	0.99022	1.18969	0.863541	1.14121
AT4G32730	1.25069	1.00863	0.991102	1.19009	0.863714	1.14136
AT5G16420	1.25101	1.00878	0.991511	1.19071	0.864262	1.1418
AT1G32760	1.25135	1.00919	0.99246	1.19148	0.864549	1.14241
AT5G20610	1.25229	1.00973	0.992854	1.19215	0.864764	1.14291
AT4G27852	1.25262	1.01007	0.993663	1.19232	0.864973	1.14346
AT3G49210	1.25323	1.01052	0.993783	1.19264	0.865224	1.14381
AT1G65440	1.25352	1.01084	0.994109	1.19299	0.86533	1.1442
AT2G40820	1.25383	1.01125	0.994348	1.19336	0.865627	1.14469
AT2G36540	1.25419	1.01182	0.994477	1.19346	0.865829	1.14513
AT1G62130	1.25489	1.01252	0.994724	1.19397	0.866089	1.14575
AT5G51350	1.25537	1.01273	0.994872	1.19439	0.866674	1.14594
AT2G04515	1.25628	1.01355	0.995223	1.19466	0.867005	1.14637
AT5G23950	1.2567	1.01412	0.995964	1.19524	0.867152	1.1468
AT4G21220	1.25709	1.01507	0.996121	1.19558	0.867293	1.14764
AT2G40160	1.25796	1.01529	0.996433	1.19575	0.867953	1.14827
AT3G25430	1.25843	1.01583	0.996872	1.19622	0.868623	1.14849
AT5G50760	1.25939	1.01611	0.997536	1.19698	0.868945	1.14977
AT3G04740	1.2596	1.01653	0.997711	1.198	0.869223	1.15005
AT5G01110	1.25966	1.017	0.998005	1.19877	0.869548	1.15087
AT5G44380	1.26022	1.01756	0.998622	1.19932	0.869908	1.15209
AT5G43730	1.26047	1.0182	0.998792	1.19965	0.870285	1.15251
AT5G51540	1.26125	1.01882	0.999299	1.20008	0.871036	1.15294
AT1G49530	1.26225	1.01917	0.999605	1.20022	0.871581	1.15391
AT4G03190	1.26278	1.01984	1.00002	1.20062	0.871925	1.15436
AT3G48120	1.26313	1.02001	1.00055	1.20088	0.872374	1.15463
AT1G35220	1.26346	1.02047	1.00121	1.20126	0.872514	1.15511
AT1G79560	1.26377	1.02079	1.00186	1.20163	0.873003	1.1559
AT3G54280	1.26404	1.02116	1.00236	1.20208	0.873291	1.15649
AT4G24270	1.26463	1.02139	1.00283	1.20266	0.873574	1.15679
AT2G46630	1.26547	1.02164	1.00303	1.2028	0.87388	1.15704
AT3G20090	1.26591	1.02174	1.00336	1.20403	0.874238	1.15741
AT1G32930	1.26617	1.02229	1.00392	1.20469	0.875202	1.15825
AT5G44540	1.26713	1.02257	1.00424	1.2052	0.87529	1.15885
AT3G15140	1.2675	1.02311	1.0046	1.20559	0.87556	1.15926
AT3G63300	1.26811	1.02355	1.00507	1.20627	0.87628	1.16011
AT3G48870	1.26852	1.02388	1.00549	1.20685	0.876918	1.16032
AT5G47940	1.26901	1.02465	1.00586	1.20747	0.877671	1.16058
AT5G17910	1.26955	1.02518	1.00636	1.2083	0.878223	1.16093
AT2G18370	1.26986	1.02554	1.00689	1.20932	0.87863	1.16111
AT2G23590	1.27029	1.02576	1.00718	1.2097	0.879401	1.16131
AT4G10600	1.27086	1.02624	1.0079	1.20995	0.879808	1.16201
AT2G30933	1.2712	1.02648	1.00797	1.21038	0.880375	1.16256
AT4G33905	1.27142	1.02694	1.00813	1.21073	0.880674	1.16311
AT4G29790	1.27176	1.02731	1.00836	1.21124	0.880899	1.16338
AT1G21150	1.27252	1.0277	1.00884	1.21261	0.881404	1.16376
AT5G03800	1.2729	1.02848	1.00931	1.21276	0.882051	1.16442
AT1G54000	1.27341	1.0287	1.00975	1.21358	0.882497	1.16524
AT2G26692	1.27405	1.0296	1.01007	1.21403	0.882949	1.16556
AT1G69020	1.27422	1.03036	1.01075	1.2144	0.883126	1.16586
AT4G17970	1.2754	1.03089	1.01153	1.21475	0.8838	1.16634
AT5G55950	1.27576	1.03151	1.01175	1.21526	0.884146	1.1673
AT2G41220	1.2763	1.03205	1.01199	1.21604	0.884625	1.16791
AT1G73830	1.27662	1.03238	1.01246	1.2168	0.885149	1.16831
AT5G19221	1.27689	1.03339	1.01271	1.21713	0.885544	1.16862
AT2G29760	1.27762	1.03376	1.01325	1.21733	0.886051	1.16875
AT3G04010	1.27805	1.03439	1.01354	1.21799	0.886392	1.1689
AT5G45780	1.27836	1.0352	1.01368	1.2186	0.886882	1.16907
AT5G35120	1.27873	1.0355	1.01384	1.21893	0.887583	1.16921
AT4G01130	1.27939	1.03575	1.01409	1.21937	0.888109	1.16961
AT5G28490	1.27987	1.03646	1.01467	1.21998	0.888283	1.1699
AT3G60490	1.28045	1.03668	1.01497	1.22031	0.888454	1.17102
AT5G40740	1.28106	1.03741	1.01534	1.22127	0.889162	1.1716
AT5G06730	1.28187	1.03761	1.01558	1.22186	0.889277	1.17187
AT1G74250	1.28241	1.03809	1.01641	1.22235	0.890074	1.17218
AT5G38310	1.28309	1.03865	1.01697	1.22261	0.890436	1.17253
AT4G10695	1.28361	1.03926	1.01751	1.22383	0.890676	1.17354
AT1G68872	1.28427	1.03941	1.01769	1.22423	0.891019	1.17466
AT5G54569	1.28466	1.03976	1.01788	1.22485	0.891133	1.17512
AT3G06520	1.28504	1.0403	1.0183	1.22531	0.891455	1.1758
AT5G55840	1.28534	1.04047	1.01876	1.22592	0.891884	1.1764
AT3G51300	1.28606	1.04086	1.01943	1.22626	0.892004	1.17691
AT1G66600	1.28681	1.04128	1.02	1.22684	0.892284	1.17744
AT1G08050	1.28734	1.04182	1.02023	1.22746	0.893154	1.17784
AT1G10270	1.2876	1.04265	1.02084	1.2279	0.893339	1.178
AT3G04380	1.28817	1.04327	1.02128	1.22843	0.893521	1.17814
AT2G40550	1.28864	1.04363	1.02155	1.229	0.894076	1.17881
AT3G47530	1.28927	1.04414	1.0219	1.22985	0.894264	1.17923
AT1G12290	1.28983	1.04442	1.02212	1.23019	0.894662	1.17946
AT3G47780	1.29077	1.04533	1.02247	1.23097	0.895259	1.18019
AT2G21710	1.29157	1.04578	1.02287	1.2313	0.895646	1.18074
AT1G53345	1.29198	1.04625	1.02324	1.23178	0.896314	1.18105
AT1G74600	1.29219	1.04684	1.0235	1.23223	0.896451	1.18149
AT2G26360	1.29241	1.04711	1.02369	1.23313	0.89669	1.1824
AT3G13225	1.29272	1.04728	1.02451	1.23353	0.89701	1.1831
AT5G56840	1.29292	1.04787	1.02461	1.23369	0.897259	1.18384
AT1G69430	1.29353	1.04821	1.02495	1.23403	0.897633	1.18428
AT4G07400	1.29391	1.04903	1.02528	1.23421	0.897861	1.18517
AT1G50270	1.29444	1.04963	1.02574	1.23456	0.898227	1.18543
AT1G68700	1.29499	1.04982	1.02611	1.23505	0.898656	1.18643
AT1G02660	1.29576	1.05007	1.02681	1.23547	0.898977	1.18703
AT2G19260	1.29596	1.0507	1.02709	1.23571	0.899177	1.18721
AT5G56050	1.29637	1.05119	1.02774	1.23645	0.899892	1.18748
AT5G45340	1.2968	1.05207	1.02833	1.23711	0.90031	1.18789
AT3G23730	1.2978	1.05266	1.02874	1.23764	0.900843	1.18849
AT4G39050	1.29818	1.05313	1.02887	1.23797	0.901145	1.18902
AT3G21710	1.2985	1.0539	1.02937	1.23841	0.901552	1.19051
AT4G24275	1.29916	1.05462	1.02988	1.23877	0.901718	1.19103
AT3G22180	1.29941	1.05504	1.03053	1.23985	0.901827	1.19134
AT2G39560	1.29966	1.05555	1.03165	1.24039	0.902025	1.1919
AT2G15480	1.29983	1.05637	1.03221	1.24075	0.902335	1.19243
AT1G02380	1.30077	1.057	1.03283	1.24116	0.902578	1.19288
AT4G33200	1.30124	1.05791	1.03344	1.24175	0.903048	1.1939
AT1G64180	1.30168	1.05871	1.03382	1.24206	0.903475	1.19455
AT4G09432	1.30197	1.05936	1.03392	1.24226	0.903773	1.19487
AT2G05120	1.3025	1.05995	1.03424	1.24252	0.904057	1.19558
AT2G41370	1.30336	1.0605	1.03442	1.24288	0.904246	1.19633
AT1G18940	1.30352	1.06096	1.03514	1.24311	0.904524	1.19708
AT3G03370	1.30412	1.06124	1.03544	1.24328	0.904893	1.19776
AT5G56530	1.30452	1.06164	1.03562	1.2435	0.905317	1.19811
AT2G18000	1.30522	1.06199	1.03606	1.24443	0.905772	1.19919
AT2G26650	1.30547	1.06235	1.03646	1.24467	0.906313	1.20004
AT5G02670	1.30591	1.06269	1.03706	1.2451	0.90718	1.20106
AT3G02140	1.30611	1.06303	1.03737	1.24538	0.907454	1.20129
AT3G09960	1.30692	1.06345	1.03781	1.24655	0.907674	1.20167
AT2G27170	1.30787	1.06367	1.03827	1.24689	0.907994	1.20221
AT5G46910	1.30851	1.06456	1.03874	1.24751	0.908307	1.20285
AT4G03090	1.30902	1.06481	1.03939	1.24789	0.908683	1.20332
AT4G16680	1.30987	1.0657	1.03979	1.24815	0.909024	1.20381
AT5G24352	1.31038	1.06654	1.04	1.24879	0.909376	1.20419
AT1G05550	1.31052	1.06689	1.04099	1.24935	0.909612	1.20445
AT1G61420	1.31102	1.06735	1.04183	1.25002	0.910163	1.20608
AT1G70320	1.31151	1.06753	1.04219	1.25044	0.910335	1.20651
AT3G21540	1.31265	1.06781	1.04271	1.25068	0.910749	1.20663
AT4G21230	1.31287	1.06861	1.04299	1.25095	0.911117	1.20718
AT3G48830	1.31355	1.06883	1.04317	1.25143	0.911616	1.2081
AT3G50110	1.31396	1.06914	1.04352	1.25244	0.911766	1.20858
AT5G52250	1.31479	1.06956	1.04396	1.25279	0.912176	1.20902
AT4G31360	1.31529	1.07006	1.04435	1.25354	0.912437	1.20943
AT5G08480	1.31636	1.07024	1.04467	1.25366	0.912691	1.21005
AT4G39420	1.31737	1.07037	1.04509	1.25431	0.913613	1.21025
AT1G61215	1.31776	1.0707	1.04561	1.25502	0.913811	1.2103
AT3G06480	1.31812	1.07182	1.04595	1.25526	0.914247	1.2107
AT5G09480	1.31897	1.07242	1.04672	1.25608	0.914649	1.21152
AT5G46640	1.32045	1.07337	1.04723	1.25648	0.914902	1.21207
AT1G31360	1.32141	1.07368	1.04763	1.25691	0.915073	1.21236
AT5G20730	1.32168	1.07388	1.04806	1.2574	0.91548	1.21305
AT2G17150	1.32196	1.07442	1.04831	1.25795	0.915869	1.21372
AT5G26790	1.32281	1.07487	1.04888	1.2582	0.916451	1.21446
AT3G59420	1.32334	1.07509	1.04908	1.25853	0.916712	1.2153
AT3G43960	1.32373	1.07553	1.04948	1.25945	0.917015	1.21591
AT3G22900	1.32387	1.07591	1.04995	1.2601	0.917269	1.21643
AT4G32710	1.32417	1.07644	1.05045	1.26031	0.917501	1.21693
AT5G20790	1.32437	1.07706	1.0512	1.2611	0.917766	1.21721
AT5G43310	1.32503	1.0773	1.05146	1.26178	0.918079	1.21772
AT3G45850	1.32532	1.07759	1.05166	1.26231	0.918287	1.21812
AT2G37362	1.32585	1.07787	1.05183	1.2631	0.918719	1.21838
AT4G23750	1.326	1.07795	1.05245	1.26382	0.919123	1.21875
AT5G65090	1.32626	1.07811	1.05284	1.26445	0.919372	1.21954
AT2G46410	1.3264	1.07839	1.05321	1.26504	0.919659	1.22003
AT1G18320	1.32681	1.07907	1.05336	1.26524	0.919976	1.22055
AT2G20320	1.32743	1.07937	1.05357	1.26587	0.920226	1.22105
AT5G66640	1.32792	1.07961	1.05381	1.26632	0.921083	1.22191
AT1G17500	1.32873	1.08053	1.05457	1.267	0.921457	1.22231
AT3G45830	1.32909	1.08085	1.05503	1.26726	0.921774	1.22279
AT5G41060	1.32998	1.08125	1.0555	1.26774	0.922423	1.22379
AT2G33330	1.33055	1.08251	1.0559	1.26806	0.922846	1.22453
AT3G24020	1.33103	1.08322	1.05628	1.26848	0.923179	1.22527
AT1G15380	1.33183	1.08334	1.0567	1.26919	0.923525	1.2262
AT1G71460	1.33244	1.08378	1.05698	1.26968	0.923977	1.22644
AT3G56250	1.33283	1.08444	1.05741	1.27033	0.924399	1.22688
AT5G51630	1.33324	1.08504	1.05795	1.27069	0.924742	1.22718
AT3G19250	1.33341	1.08562	1.05824	1.27181	0.925241	1.22797
AT5G26160	1.33368	1.08583	1.05833	1.27205	0.92573	1.22818
AT5G45790	1.33407	1.08627	1.0585	1.27222	0.92595	1.22845
AT1G68940	1.33493	1.08641	1.05888	1.27265	0.926202	1.22883
AT1G18910	1.33536	1.08682	1.05898	1.27282	0.926501	1.22937
AT2G43580	1.33592	1.08751	1.0595	1.27371	0.926949	1.22971
AT3G57700	1.33654	1.0881	1.05987	1.27433	0.927227	1.23021
AT1G70060	1.33744	1.08839	1.06063	1.27473	0.927713	1.23025
AT1G57700	1.33822	1.08873	1.06083	1.27568	0.928083	1.23112
AT2G47220	1.33845	1.0889	1.06108	1.27621	0.928406	1.23161
AT3G21330	1.33852	1.08913	1.06163	1.27657	0.928622	1.23201
AT5G02320	1.33957	1.0898	1.06229	1.27767	0.929369	1.23214
AT2G26560	1.33993	1.09009	1.06291	1.27834	0.92971	1.23274
AT2G46590	1.34033	1.09041	1.06352	1.27909	0.929955	1.23302
AT3G19190	1.34082	1.09097	1.06381	1.28025	0.930184	1.23313
AT5G24750	1.34173	1.09154	1.06423	1.2804	0.930596	1.23331
AT5G57190	1.34185	1.09202	1.06433	1.28127	0.930783	1.23345
AT1G80280	1.34269	1.09228	1.06455	1.28157	0.931058	1.23368
AT1G48370	1.34318	1.09317	1.0651	1.28187	0.931852	1.23379
AT5G38770	1.34345	1.09337	1.06588	1.28273	0.93273	1.23419
AT3G56640	1.34374	1.09365	1.06619	1.28332	0.933121	1.23466
AT2G04033	1.34417	1.09398	1.06672	1.28352	0.933491	1.23557
AT5G05160	1.34454	1.09499	1.06759	1.28449	0.933921	1.23606
AT5G63650	1.34534	1.09594	1.06815	1.28476	0.934175	1.23654
AT4G38380	1.34581	1.09625	1.0686	1.28511	0.934486	1.23683
AT3G58820	1.34647	1.09663	1.06924	1.28608	0.934729	1.23697
AT2G42395	1.34695	1.0969	1.06955	1.28628	0.935142	1.23833
AT2G44370	1.34752	1.0973	1.0702	1.28659	0.935208	1.23907
AT5G45650	1.3482	1.09749	1.07064	1.2868	0.93552	1.23939
AT2G02410	1.34888	1.09797	1.07122	1.28711	0.935737	1.23956
AT5G23240	1.34938	1.09811	1.07155	1.28747	0.936087	1.24004
AT2G31270	1.3499	1.09907	1.07239	1.28787	0.936397	1.24048
AT4G09920	1.35033	1.09986	1.07301	1.28937	0.936721	1.24084
AT1G19830	1.35072	1.10027	1.07325	1.2897	0.936944	1.24203
AT5G54710	1.35125	1.10057	1.07355	1.29018	0.937542	1.24257
AT5G48040	1.35155	1.10086	1.07405	1.29045	0.937662	1.24334
AT5G07610	1.35297	1.10165	1.07465	1.29117	0.938531	1.24376
AT4G13190	1.35368	1.1018	1.07489	1.29174	0.938682	1.24395
AT4G39230	1.35415	1.10236	1.07532	1.29184	0.939001	1.24463
AT4G12840	1.35508	1.10244	1.07589	1.29244	0.939315	1.24503
AT4G33620	1.35543	1.10274	1.07616	1.29325	0.939686	1.24616
AT1G24090	1.35621	1.10293	1.07659	1.29347	0.939942	1.24632
AT1G73010	1.35669	1.10314	1.07692	1.29406	0.940522	1.247
AT4G37620	1.35731	1.10395	1.07703	1.29504	0.940812	1.24751
AT1G69900	1.35767	1.10479	1.07754	1.29527	0.941043	1.2482
AT5G67310	1.35814	1.10541	1.07799	1.2955	0.941381	1.24868
AT4G03230	1.35879	1.10571	1.07879	1.29601	0.94206	1.24911
AT2G07739	1.35907	1.10602	1.07915	1.29643	0.942593	1.24968
AT4G15850	1.35963	1.10628	1.07952	1.29665	0.943157	1.25062
AT1G64300	1.36089	1.10675	1.07965	1.29769	0.943324	1.25162
ATCG00350	1.36154	1.10695	1.08011	1.2978	0.943418	1.25274
AT5G38280	1.36203	1.10706	1.08064	1.29803	0.943613	1.25288
AT5G13920	1.36245	1.10723	1.08153	1.29854	0.944153	1.25378
AT5G27030	1.36262	1.10738	1.08217	1.29873	0.944582	1.25459
AT5G45469	1.36308	1.10798	1.08258	1.29917	0.945276	1.25545
AT5G09690	1.3639	1.10835	1.08322	1.29975	0.945693	1.25688
AT4G26670	1.36411	1.1087	1.08389	1.30058	0.945877	1.25779
AT2G24440	1.36437	1.10917	1.08457	1.30073	0.946342	1.25822
AT4G36280	1.36472	1.10953	1.08493	1.30161	0.946886	1.2589
AT5G59240	1.36507	1.10987	1.08578	1.30278	0.947136	1.25937
AT3G07610	1.36611	1.11027	1.08596	1.30334	0.947719	1.25962
AT1G62400	1.36669	1.11092	1.08628	1.30357	0.947991	1.2605
AT5G17850	1.36724	1.1115	1.08648	1.30393	0.948232	1.26074
AT1G47578	1.3679	1.11167	1.08746	1.30421	0.948667	1.26122
AT2G02980	1.36885	1.11191	1.08843	1.30455	0.949062	1.2613
AT2G27140	1.36966	1.11279	1.08869	1.30552	0.949431	1.26253
AT2G38440	1.37035	1.11305	1.08889	1.30582	0.949683	1.26294
AT1G72730	1.37056	1.11317	1.08919	1.30659	0.95095	1.26347
AT4G14860	1.37148	1.1134	1.08961	1.3071	0.951224	1.26361
AT2G03540	1.37199	1.1136	1.09026	1.30781	0.951578	1.26411
AT5G66455	1.37215	1.11437	1.0906	1.30817	0.95202	1.26479
AT5G16340	1.37316	1.11474	1.09103	1.30877	0.952132	1.26514
AT1G67600	1.37367	1.11504	1.09182	1.30946	0.952464	1.26637
AT2G38823	1.37397	1.11568	1.09211	1.30991	0.952649	1.26662
AT1G05910	1.37565	1.11607	1.09264	1.31035	0.95306	1.26673
AT2G25220	1.37611	1.11635	1.09355	1.31144	0.953528	1.2673
AT1G14660	1.37662	1.11708	1.09386	1.31189	0.954124	1.26797
AT4G36610	1.37693	1.11747	1.09447	1.31228	0.954341	1.2682
AT5G04230	1.37759	1.11793	1.09463	1.31285	0.954644	1.26936
AT5G66080	1.37796	1.11825	1.09527	1.31383	0.955195	1.26963
AT5G65300	1.37874	1.11893	1.09548	1.31449	0.955401	1.26998
AT3G61800	1.37893	1.11942	1.0957	1.31502	0.955857	1.27025
AT1G21610	1.37982	1.12006	1.09597	1.31539	0.95617	1.27057
AT5G62820	1.38026	1.12046	1.09623	1.31591	0.956398	1.27152
AT5G65460	1.38089	1.1213	1.09659	1.31695	0.957406	1.27194
AT1G27960	1.38189	1.12162	1.09693	1.31744	0.958009	1.27241
AT2G02790	1.38222	1.12223	1.09782	1.31841	0.95837	1.27264
AT5G45260	1.38241	1.12262	1.09817	1.31859	0.95881	1.27344
AT2G28360	1.3832	1.12294	1.09848	1.31928	0.959302	1.2737
AT5G64530	1.38375	1.12361	1.0986	1.31943	0.959573	1.27464
AT1G07880	1.38445	1.1248	1.09887	1.3196	0.95983	1.27524
AT3G60110	1.38513	1.125	1.09946	1.32014	0.959972	1.27631
AT4G19650	1.38577	1.12549	1.09989	1.32061	0.960364	1.27642
AT2G36370	1.38624	1.12641	1.1003	1.32088	0.960708	1.27712
AT3G45650	1.38699	1.12701	1.10053	1.32125	0.960798	1.27743
AT3G44560	1.38773	1.12723	1.10063	1.32176	0.961365	1.27843
AT2G15220	1.38792	1.12767	1.10105	1.32221	0.961458	1.27931
AT2G42010	1.38854	1.12831	1.10133	1.32256	0.962241	1.27983
AT5G28626	1.38964	1.12918	1.10181	1.323	0.963103	1.28089
AT5G46220	1.39015	1.13005	1.1019	1.3239	0.963608	1.2812
AT1G43910	1.39061	1.13036	1.10255	1.32424	0.963929	1.28221
AT1G34065	1.39125	1.13125	1.10292	1.32446	0.964183	1.28265
AT3G57300	1.39214	1.13182	1.10347	1.32475	0.96455	1.28281
AT4G37250	1.39243	1.13235	1.10384	1.32542	0.964908	1.28349
AT3G03855	1.39297	1.13285	1.10418	1.32594	0.965153	1.28443
AT5G42800	1.39451	1.13335	1.10457	1.32664	0.965524	1.28475
AT2G28160	1.39562	1.13394	1.10498	1.32737	0.966027	1.28534
AT3G26680	1.39617	1.13447	1.10543	1.32763	0.966403	1.28651
AT5G47820	1.39656	1.1351	1.10576	1.32814	0.966769	1.28704
AT3G05360	1.39781	1.13559	1.10601	1.32899	0.967276	1.28733
AT2G38110	1.39865	1.13592	1.10643	1.3299	0.967984	1.28763
AT1G26570	1.39948	1.13671	1.10681	1.33057	0.968128	1.28831
AT2G32235	1.39987	1.13733	1.10725	1.33125	0.968368	1.28918
AT3G25730	1.40007	1.13808	1.10746	1.33157	0.968584	1.2894
AT3G26910	1.40081	1.13881	1.10772	1.33229	0.969112	1.28952
AT1G52620	1.40142	1.13943	1.10822	1.33284	0.969352	1.29058
AT3G56570	1.4016	1.13981	1.10884	1.33349	0.969461	1.29132
AT5G05180	1.40201	1.14032	1.10923	1.33373	0.969945	1.29178
AT4G34930	1.40285	1.14076	1.10975	1.33405	0.970186	1.29213
AT5G17370	1.40334	1.14143	1.11003	1.33467	0.970904	1.29273
AT3G06455	1.40346	1.1418	1.11065	1.33505	0.970988	1.29348
AT4G20400	1.40417	1.14211	1.111	1.3354	0.971345	1.29363
AT1G78530	1.40474	1.14281	1.11158	1.33612	0.971692	1.29403
AT1G06740	1.40512	1.14316	1.11173	1.3369	0.971855	1.29437
AT1G21650	1.40561	1.14363	1.11215	1.33782	0.972087	1.29516
AT3G57430	1.4063	1.14413	1.11261	1.33851	0.972347	1.29593
AT2G38770	1.40677	1.14463	1.11359	1.33914	0.972658	1.29617
AT5G40330	1.40728	1.14491	1.11432	1.33973	0.972846	1.29675
AT1G22065	1.40753	1.14552	1.11447	1.34011	0.973422	1.29744
ATCG00660	1.40779	1.14628	1.11474	1.34034	0.973691	1.29784
AT1G74160	1.40823	1.14684	1.11494	1.34081	0.974407	1.29835
AT3G29250	1.40929	1.1475	1.1151	1.34141	0.974718	1.29903
AT3G27870	1.41009	1.14792	1.11528	1.34189	0.975175	1.29986
AT5G16980	1.41048	1.14837	1.11579	1.34253	0.975305	1.30011
AT4G03250	1.41108	1.14862	1.11661	1.34301	0.975489	1.30048
AT4G19560	1.41129	1.14921	1.11684	1.34356	0.976085	1.30066
AT5G34790	1.41175	1.14944	1.11798	1.34396	0.976244	1.30105
AT4G40085	1.41263	1.14955	1.11857	1.34459	0.976557	1.30126
AT1G63490	1.4135	1.15033	1.11872	1.3462	0.976687	1.30225
AT3G46920	1.41436	1.15048	1.1192	1.34719	0.977088	1.30256
AT2G28140	1.4148	1.15082	1.11944	1.3482	0.977415	1.30277
AT1G47410	1.41561	1.15099	1.11968	1.34869	0.977652	1.30327
AT1G26762	1.41571	1.15121	1.1198	1.34956	0.978006	1.30463
AT1G07490	1.41651	1.15174	1.12019	1.34985	0.97839	1.30486
AT1G27420	1.41663	1.15217	1.12096	1.35021	0.9789	1.30535
AT2G45080	1.41702	1.1527	1.12167	1.35032	0.979299	1.30567
AT2G46200	1.41773	1.15356	1.12206	1.35116	0.979472	1.30613
AT1G51370	1.41831	1.1538	1.12236	1.35157	0.979947	1.30685
AT4G32000	1.41871	1.1542	1.12286	1.3518	0.980997	1.30741
AT3G22961	1.41918	1.15451	1.12367	1.35202	0.981545	1.30794
AT2G16250	1.41946	1.15597	1.12385	1.35259	0.981895	1.30829
AT2G25350	1.41978	1.15634	1.12453	1.35278	0.982487	1.30899
AT2G34925	1.42009	1.15651	1.12469	1.35302	0.982702	1.30934
AT3G54000	1.42113	1.15658	1.12496	1.35359	0.982847	1.31018
AT3G02120	1.42159	1.15711	1.12551	1.35451	0.983276	1.31071
AT3G15400	1.42187	1.15762	1.12619	1.35494	0.983939	1.31147
AT2G43000	1.42227	1.15798	1.12728	1.35523	0.984505	1.31235
AT5G17880	1.42242	1.15846	1.12746	1.35554	0.984768	1.3128
AT1G31240	1.42327	1.15868	1.12775	1.35591	0.985165	1.31309
AT4G10890	1.42366	1.15911	1.1281	1.35613	0.985262	1.31362
AT1G55020	1.42408	1.15952	1.12841	1.35639	0.985629	1.31441
AT5G66540	1.42451	1.15993	1.12939	1.35662	0.985831	1.31514
AT4G37730	1.42503	1.16048	1.12994	1.35712	0.986259	1.31536
AT3G04220	1.42529	1.16092	1.13042	1.35772	0.986507	1.3159
AT4G37710	1.42623	1.16142	1.13095	1.35814	0.987475	1.31602
AT1G73700	1.42704	1.16253	1.13117	1.35878	0.987716	1.31661
AT5G22690	1.42746	1.16348	1.13179	1.35922	0.988333	1.31709
AT5G20320	1.42757	1.16378	1.13271	1.35958	0.988809	1.31771
AT5G64450	1.42786	1.16459	1.13295	1.35995	0.989249	1.31837
AT1G01770	1.42841	1.16565	1.13371	1.36055	0.989484	1.31931
AT1G04300	1.42871	1.16636	1.13395	1.36094	0.989921	1.32007
AT1G73890	1.4295	1.16677	1.1343	1.36147	0.99041	1.32092
AT4G31880	1.4304	1.16719	1.13499	1.36243	0.990636	1.3213
AT5G38730	1.43126	1.16736	1.13548	1.36323	0.991514	1.32142
AT2G37930	1.43174	1.16822	1.13572	1.36388	0.991765	1.32197
AT4G33160	1.43204	1.16903	1.13612	1.36409	0.9922	1.32335
AT3G25020	1.43248	1.16967	1.13663	1.36448	0.992338	1.32347
AT2G41510	1.43289	1.17048	1.13745	1.36491	0.992772	1.32505
AT2G32280	1.43328	1.17114	1.13754	1.36519	0.993229	1.32527
AT1G74360	1.43355	1.17136	1.13797	1.3655	0.993739	1.32555
AT1G30010	1.43378	1.17192	1.13823	1.366	0.994007	1.32617
AT1G77855	1.43463	1.17269	1.13924	1.36644	0.994445	1.32649
ATCG01070	1.43515	1.17354	1.13942	1.36677	0.994978	1.32691
AT2G32765	1.43571	1.17399	1.13978	1.36742	0.995218	1.32748
AT1G05100	1.43593	1.17453	1.14063	1.36777	0.995704	1.32783
AT4G03440	1.43616	1.17496	1.14076	1.36841	0.995979	1.3282
AT4G16745	1.43694	1.17586	1.14157	1.3689	0.99626	1.32843
AT5G43820	1.43706	1.17612	1.14197	1.36938	0.99689	1.3287
AT5G27270	1.43839	1.1766	1.14223	1.36984	0.997199	1.3294
AT2G44440	1.43874	1.1769	1.14272	1.37007	0.997927	1.32985
AT5G08780	1.43924	1.1777	1.14324	1.3704	0.998249	1.3301
AT4G39403	1.43967	1.17798	1.14371	1.37095	0.999521	1.33044
AT3G11080	1.43988	1.17833	1.14414	1.37207	0.999792	1.33118
AT2G11880	1.44007	1.17877	1.14458	1.37335	0.99999	1.33147
AT1G56120	1.44081	1.17954	1.1452	1.3738	1.00028	1.33205
AT3G09230	1.44126	1.18013	1.14557	1.37452	1.00067	1.33248
AT1G49370	1.44175	1.1815	1.14607	1.37481	1.00084	1.33295
AT3G02160	1.44207	1.18197	1.1465	1.37542	1.00134	1.33334
AT3G28857	1.4423	1.18236	1.14714	1.37576	1.00154	1.33398
AT5G49960	1.4428	1.18302	1.14759	1.37611	1.00197	1.33525
AT3G25670	1.44388	1.18347	1.14834	1.37629	1.0024	1.33542
AT5G60440	1.44401	1.18412	1.1486	1.37686	1.00293	1.33567
AT1G55820	1.44469	1.18479	1.14879	1.37737	1.00323	1.33601
AT4G10270	1.44524	1.18541	1.14923	1.37834	1.0036	1.33617
AT1G06370	1.44571	1.18627	1.14983	1.37912	1.00372	1.33641
AT4G25835	1.44603	1.1867	1.15055	1.37945	1.00447	1.33664
AT4G15233	1.44669	1.18694	1.15102	1.37976	1.00454	1.33767
AT3G45880	1.44792	1.18715	1.1516	1.38026	1.00461	1.33792
AT4G05053	1.44859	1.18742	1.15243	1.38053	1.00498	1.33826
AT3G52520	1.44928	1.18803	1.15312	1.38116	1.00537	1.33882
AT3G52680	1.44999	1.18831	1.15339	1.38166	1.00573	1.33951
AT4G30180	1.45198	1.18862	1.15371	1.38213	1.0061	1.33984
AT1G16780	1.45217	1.18898	1.15404	1.38249	1.00664	1.34041
AT1G02430	1.45334	1.18989	1.15454	1.38285	1.00684	1.34068
AT2G02120	1.45447	1.19081	1.15496	1.38319	1.00722	1.3416
AT3G57600	1.45461	1.19103	1.15544	1.38336	1.00764	1.34321
AT1G64210	1.455	1.19181	1.15595	1.38418	1.00801	1.34448
AT5G04860	1.45595	1.19198	1.15633	1.38455	1.0082	1.34471
AT3G26782	1.45649	1.19261	1.15685	1.38549	1.00845	1.3452
AT3G56000	1.45703	1.19331	1.15708	1.38604	1.00859	1.34676
AT5G38870	1.45725	1.19375	1.15771	1.38655	1.00896	1.3477
AT1G34100	1.45824	1.19398	1.15834	1.38713	1.00908	1.34814
AT2G45830	1.45862	1.19432	1.15931	1.38744	1.00961	1.34852
AT5G09445	1.45905	1.19453	1.1599	1.38762	1.01028	1.34928
AT2G28650	1.45941	1.19498	1.16046	1.38853	1.01063	1.3497
AT3G19740	1.45991	1.19565	1.16084	1.38864	1.01075	1.35028
AT3G28455	1.46054	1.19588	1.16138	1.38905	1.01138	1.35235
AT1G14687	1.46165	1.19614	1.1622	1.38962	1.01201	1.35288
AT1G79190	1.4619	1.19648	1.16278	1.38991	1.01282	1.35352
AT2G34300	1.46287	1.19687	1.16303	1.39053	1.01355	1.35363
AT1G13170	1.46322	1.19764	1.16341	1.39196	1.01448	1.35428
AT1G48315	1.46401	1.19783	1.16403	1.39228	1.01475	1.35529
AT5G12300	1.46498	1.19849	1.16435	1.39327	1.01501	1.35571
AT4G19850	1.46571	1.19891	1.16471	1.39388	1.01542	1.35602
AT5G49530	1.46618	1.19932	1.16493	1.39453	1.01608	1.35653
AT3G22100	1.46675	1.19948	1.16537	1.39563	1.01677	1.35685
AT4G09950	1.46772	1.20005	1.16603	1.39618	1.01705	1.35779
AT1G30410	1.46861	1.20042	1.16687	1.39658	1.01727	1.35848
AT2G40815	1.46894	1.20098	1.1685	1.39759	1.01745	1.35887
AT1G07615	1.46924	1.20114	1.16936	1.39803	1.01812	1.35933
AT2G01950	1.4699	1.20157	1.16999	1.39868	1.01842	1.35949
AT3G23290	1.47066	1.20224	1.17064	1.39916	1.019	1.36057
AT2G14220	1.47129	1.20263	1.17108	1.39966	1.01928	1.36102
AT2G44255	1.47157	1.20307	1.1712	1.40008	1.01974	1.36148
AT2G48030	1.47201	1.20371	1.17179	1.4005	1.02036	1.3618
AT4G10070	1.4728	1.20427	1.17227	1.40098	1.02099	1.36206
AT5G18475	1.47313	1.20515	1.17291	1.40145	1.02112	1.36271
AT4G23590	1.47367	1.20574	1.17335	1.40197	1.02137	1.36294
AT3G17580	1.47461	1.20632	1.1737	1.40234	1.0218	1.3632
AT1G77120	1.47512	1.20696	1.17449	1.40322	1.022	1.36366
AT2G30424	1.47544	1.20751	1.17508	1.40369	1.02228	1.36398
AT1G75480	1.47623	1.2079	1.17534	1.40406	1.02292	1.36469
AT4G18250	1.47684	1.20855	1.17557	1.40484	1.02304	1.36507
AT2G25320	1.47776	1.20883	1.1762	1.40587	1.02368	1.3658
AT3G15357	1.47869	1.20978	1.17655	1.40619	1.02395	1.36661
AT2G36770	1.47966	1.21057	1.1768	1.40659	1.02429	1.36704
AT4G15820	1.48005	1.21096	1.17746	1.40739	1.02483	1.36727
AT3G16020	1.48042	1.21162	1.17764	1.40811	1.02512	1.36776
AT2G25640	1.48114	1.21196	1.17779	1.40943	1.02569	1.36798
AT4G33985	1.48172	1.21226	1.17882	1.41025	1.02587	1.36834
AT3G27630	1.48192	1.21259	1.17929	1.4106	1.02655	1.36884
AT2G21090	1.48232	1.21306	1.17968	1.41122	1.02698	1.36919
AT2G41820	1.48306	1.21322	1.18065	1.41144	1.02735	1.36966
AT2G42510	1.4834	1.2136	1.18094	1.41173	1.02746	1.3699
AT5G09790	1.48389	1.21459	1.18151	1.41234	1.02772	1.37016
AT5G01640	1.48511	1.21505	1.1821	1.41275	1.02828	1.37037
AT4G26960	1.48577	1.21586	1.18264	1.41347	1.02849	1.37102
AT5G56890	1.48609	1.21636	1.1831	1.41411	1.02886	1.37163
AT4G22680	1.48706	1.21671	1.18368	1.41431	1.02927	1.37221
AT1G54200	1.48768	1.21766	1.18391	1.41484	1.02954	1.37254
AT1G17190	1.48846	1.21842	1.18449	1.41528	1.02977	1.3731
AT3G03060	1.4887	1.2188	1.18484	1.41552	1.03009	1.37372
AT1G08410	1.48914	1.21952	1.18515	1.41645	1.03038	1.37385
AT5G38690	1.49017	1.21994	1.18538	1.41662	1.03108	1.37535
AT1G16690	1.49113	1.22059	1.18597	1.41745	1.03142	1.3757
AT5G08550	1.49147	1.22115	1.18625	1.41778	1.03231	1.37642
AT3G23010	1.49211	1.22134	1.18661	1.41825	1.03319	1.37729
AT2G21080	1.49283	1.22212	1.18739	1.41837	1.03378	1.37783
AT4G12770	1.49364	1.22265	1.18804	1.41911	1.03422	1.37851
AT2G34090	1.4944	1.22315	1.1885	1.41944	1.03473	1.37889
AT5G10605	1.49537	1.22396	1.189	1.41991	1.03531	1.37909
AT3G21950	1.49621	1.22438	1.18914	1.42014	1.03563	1.37928
AT1G56520	1.49691	1.2257	1.19033	1.42082	1.03583	1.37972
AT5G07740	1.49747	1.22612	1.19126	1.42135	1.03636	1.37998
AT5G61920	1.49763	1.22641	1.19153	1.42191	1.03662	1.38038
AT3G01370	1.49862	1.22695	1.19264	1.42287	1.03683	1.38113
AT5G02250	1.49962	1.22752	1.19314	1.42339	1.0371	1.38181
AT3G13857	1.50061	1.22765	1.19358	1.42429	1.03739	1.38226
AT1G16820	1.50152	1.22798	1.19424	1.42488	1.03781	1.38264
AT3G20480	1.50208	1.22849	1.19443	1.42564	1.03805	1.38292
AT4G18970	1.50252	1.22907	1.19491	1.42606	1.03823	1.38363
AT3G13782	1.50271	1.22971	1.19588	1.42638	1.03871	1.38429
AT1G16270	1.50311	1.22992	1.196	1.42651	1.03911	1.38492
AT4G21400	1.50341	1.23011	1.19698	1.427	1.03942	1.38583
AT1G21695	1.50388	1.23034	1.19738	1.42714	1.0399	1.3867
AT1G15080	1.50418	1.23053	1.19787	1.42808	1.04062	1.38735
AT1G61210	1.50483	1.23088	1.19828	1.42838	1.04116	1.38806
AT5G22450	1.50503	1.23132	1.19909	1.42879	1.0417	1.3885
AT1G28350	1.50557	1.23163	1.19969	1.42956	1.04198	1.38883
AT2G33060	1.50589	1.23222	1.20029	1.43034	1.04226	1.38908
AT5G50390	1.50693	1.23284	1.2012	1.4307	1.04265	1.39015
AT5G42010	1.50741	1.23305	1.20175	1.43139	1.04306	1.39109
AT1G34260	1.50786	1.23383	1.20229	1.4319	1.04356	1.39196
AT4G18375	1.50861	1.23434	1.20279	1.4324	1.04393	1.39223
AT1G12672	1.5091	1.23489	1.20398	1.43259	1.04431	1.39306
AT5G16080	1.50931	1.2356	1.20502	1.43282	1.04458	1.39426
ATCG00360	1.5099	1.23692	1.20534	1.43309	1.04501	1.3955
AT2G47240	1.51056	1.23712	1.20576	1.43363	1.04512	1.3961
AT2G35710	1.51093	1.23746	1.20664	1.43416	1.04547	1.39697
AT4G21410	1.51151	1.23784	1.20704	1.43463	1.04597	1.39766
AT1G05750	1.51199	1.2382	1.20766	1.43489	1.04618	1.39793
AT5G01380	1.51238	1.23888	1.20824	1.43535	1.04706	1.39828
AT3G01610	1.51292	1.23968	1.20866	1.43586	1.04737	1.39842
AT2G25420	1.5135	1.2403	1.20884	1.43647	1.04767	1.39975
AT1G08620	1.51431	1.24051	1.20923	1.43683	1.04791	1.4002
AT5G07030	1.51459	1.24073	1.20935	1.43833	1.04838	1.4008
AT1G27595	1.5152	1.24149	1.20981	1.43888	1.04874	1.40149
AT5G24080	1.51559	1.24217	1.21001	1.43927	1.0496	1.40177
AT1G18190	1.51633	1.24266	1.21086	1.43991	1.05056	1.40223
AT3G20865	1.51744	1.24304	1.21147	1.44061	1.05069	1.403
AT1G18250	1.51826	1.2437	1.21166	1.44071	1.05112	1.40394
AT5G38610	1.51849	1.24492	1.21229	1.44134	1.05151	1.40419
AT4G15975	1.5191	1.24577	1.21292	1.44188	1.05176	1.40513
AT5G50780	1.5193	1.24599	1.21336	1.44218	1.05195	1.40588
AT5G45000	1.51966	1.24665	1.21381	1.44301	1.05267	1.40632
AT5G20980	1.52031	1.24707	1.21418	1.44379	1.05319	1.40711
AT3G26560	1.521	1.2476	1.21481	1.44508	1.054	1.40791
AT2G30945	1.52121	1.24794	1.21508	1.44577	1.05435	1.40822
AT1G02990	1.52171	1.24835	1.21587	1.44622	1.05494	1.40848
AT5G62280	1.52265	1.24917	1.21619	1.44676	1.05539	1.40865
AT1G68810	1.52311	1.24928	1.21647	1.44732	1.05589	1.40956
AT4G16400	1.52419	1.24964	1.21661	1.44789	1.05626	1.41039
AT2G39240	1.5249	1.25005	1.21694	1.44873	1.05659	1.4114
AT5G42920	1.52523	1.25028	1.2174	1.44928	1.05686	1.4117
AT1G01780	1.52567	1.2506	1.2181	1.45097	1.05704	1.41231
AT2G13970	1.52641	1.25093	1.21866	1.45169	1.05746	1.41296
AT4G15090	1.527	1.25201	1.21891	1.452	1.05786	1.41358
AT2G35540	1.52777	1.25277	1.2194	1.4526	1.05808	1.4139
AT5G13460	1.52856	1.2533	1.22077	1.45341	1.05835	1.41415
AT1G64450	1.52903	1.2538	1.22176	1.45414	1.05913	1.41466
AT3G44940	1.52944	1.25451	1.22243	1.45476	1.05935	1.41482
AT1G16830	1.53003	1.25478	1.22298	1.45521	1.05955	1.41607
AT4G16340	1.5303	1.25505	1.22331	1.45556	1.05972	1.41731
AT4G18300	1.53071	1.25602	1.22415	1.45592	1.06008	1.41845
AT1G79700	1.53101	1.25639	1.22467	1.45637	1.06061	1.41866
AT4G11530	1.53122	1.25703	1.22506	1.45657	1.06095	1.41914
AT3G21560	1.5317	1.25734	1.22563	1.45699	1.06124	1.41932
AT5G17460	1.53218	1.25803	1.22591	1.45749	1.06146	1.41962
AT4G04190	1.53343	1.25824	1.22629	1.45785	1.06206	1.42039
AT1G78580	1.53394	1.25895	1.22684	1.45874	1.06223	1.42073
AT5G37570	1.53468	1.25927	1.22716	1.45942	1.06316	1.42126
AT2G39580	1.53561	1.2599	1.22748	1.46023	1.06324	1.42203
AT3G29680	1.53617	1.26013	1.22841	1.46076	1.06364	1.42298
AT5G16210	1.53636	1.26042	1.22916	1.46096	1.06431	1.42393
AT3G63070	1.53699	1.26067	1.22945	1.4613	1.06456	1.42479
AT1G22250	1.53809	1.26115	1.22991	1.46158	1.06489	1.42534
AT1G74170	1.5389	1.26198	1.23036	1.4619	1.06505	1.42552
AT1G12480	1.53937	1.26301	1.23063	1.46284	1.06618	1.4262
AT1G67328	1.54048	1.26367	1.23116	1.46358	1.06658	1.42634
AT4G21500	1.54122	1.26398	1.23207	1.46392	1.06706	1.42686
AT3G55390	1.54195	1.26431	1.23258	1.46428	1.06732	1.4275
AT1G58160	1.54299	1.26501	1.23277	1.46449	1.06785	1.42796
AT3G52790	1.54333	1.26523	1.23298	1.46549	1.0682	1.4283
AT1G38131	1.5436	1.26554	1.23333	1.46603	1.06835	1.42864
AT3G13380	1.54405	1.26626	1.23367	1.46671	1.06854	1.4304
AT5G35753	1.5446	1.26671	1.23405	1.46721	1.06873	1.43065
AT5G09530	1.54486	1.26736	1.23426	1.46772	1.06892	1.43123
AT3G11850	1.54569	1.26827	1.2346	1.46864	1.06971	1.43156
AT5G61040	1.54631	1.26869	1.23551	1.46884	1.06991	1.43209
AT3G63440	1.54653	1.26915	1.23597	1.46913	1.0703	1.43246
AT1G23200	1.54707	1.2696	1.23664	1.46944	1.07057	1.43288
AT4G25270	1.54786	1.26978	1.23676	1.46997	1.07069	1.4331
AT5G54200	1.54847	1.27034	1.23713	1.47084	1.07111	1.43395
AT5G06690	1.5495	1.27077	1.23785	1.4713	1.07135	1.43441
AT4G34160	1.5499	1.27161	1.23835	1.47198	1.07187	1.4346
AT4G12680	1.55003	1.27182	1.23938	1.47268	1.07236	1.43504
AT2G47020	1.55109	1.27213	1.2397	1.47332	1.07283	1.43528
AT1G68400	1.55185	1.27317	1.24091	1.47374	1.07323	1.43594
AT1G35515	1.55225	1.2733	1.24149	1.47431	1.07361	1.43636
AT5G20225	1.55252	1.27435	1.24157	1.47534	1.07386	1.43785
AT1G23060	1.55325	1.27465	1.24212	1.476	1.07409	1.43896
AT5G46100	1.55392	1.27573	1.2426	1.47637	1.07427	1.43902
AT4G34410	1.5552	1.27638	1.24276	1.47689	1.07475	1.43998
AT5G64000	1.55584	1.27695	1.24337	1.4774	1.07509	1.44071
AT5G61350	1.55629	1.27746	1.24411	1.47805	1.07556	1.44114
AT4G02760	1.55669	1.27791	1.24449	1.47868	1.0761	1.44155
AT2G32340	1.55738	1.27813	1.24478	1.47897	1.07669	1.44205
AT5G02860	1.55745	1.27869	1.24517	1.47989	1.07716	1.44314
AT5G47130	1.55785	1.27911	1.24553	1.48066	1.07784	1.44368
AT3G06010	1.55811	1.27941	1.24633	1.48104	1.07824	1.44408
AT1G53440	1.55834	1.27989	1.24727	1.48189	1.07834	1.44442
AT2G24960	1.5592	1.28014	1.2476	1.48274	1.07879	1.44479
AT1G23470	1.56001	1.28041	1.2481	1.48314	1.07908	1.4453
AT1G06980	1.56131	1.28081	1.24829	1.48342	1.0793	1.44714
AT1G02360	1.56212	1.28158	1.2487	1.48442	1.07965	1.448
AT2G48110	1.56259	1.28217	1.24898	1.48461	1.08017	1.44871
AT2G25470	1.56315	1.28243	1.24944	1.48559	1.08069	1.44974
AT2G32000	1.56372	1.28288	1.24984	1.48633	1.0812	1.45064
AT2G41130	1.56421	1.28333	1.25067	1.48679	1.08136	1.45119
AT1G13970	1.56468	1.28381	1.25095	1.48741	1.08179	1.45174
AT2G33847	1.56497	1.28446	1.25141	1.48816	1.08191	1.45321
AT1G24764	1.56579	1.2848	1.25194	1.48949	1.08214	1.45465
AT2G01890	1.56657	1.28519	1.25248	1.48994	1.08313	1.45534
AT2G18330	1.56781	1.2864	1.25317	1.49064	1.08325	1.45586
AT3G54750	1.56856	1.28671	1.25346	1.49114	1.08369	1.45643
AT5G02260	1.56911	1.28711	1.25411	1.49129	1.08407	1.45661
AT1G75290	1.56951	1.28766	1.25463	1.49157	1.08422	1.45745
AT4G23410	1.56973	1.28808	1.25514	1.49173	1.08456	1.45781
AT4G38660	1.57027	1.2882	1.25566	1.49243	1.08494	1.45805
AT4G05091	1.57143	1.28862	1.25644	1.49337	1.08531	1.45841
AT2G28260	1.57266	1.28939	1.25754	1.49387	1.08593	1.45886
AT3G48600	1.5737	1.29041	1.25799	1.49439	1.08632	1.46021
AT3G62050	1.57423	1.2915	1.25847	1.49524	1.0865	1.46051
AT3G02110	1.57487	1.29196	1.25872	1.4959	1.08709	1.46154
AT3G12020	1.57613	1.29217	1.25891	1.49649	1.08747	1.46242
AT1G77030	1.57653	1.29283	1.25915	1.49703	1.08784	1.46274
AT3G61690	1.57692	1.29306	1.25943	1.49726	1.08795	1.46322
AT5G35750	1.57777	1.29361	1.25974	1.49769	1.08821	1.46362
AT4G02482	1.57825	1.29425	1.26016	1.49821	1.08878	1.46392
AT2G34650	1.57874	1.29472	1.26069	1.49856	1.08921	1.46459
AT3G15750	1.57977	1.2951	1.26138	1.49907	1.08972	1.46516
AT5G16490	1.58011	1.29537	1.26188	1.50018	1.09019	1.46562
AT1G22170	1.58125	1.296	1.26257	1.5006	1.09165	1.46611
AT2G44450	1.58188	1.29661	1.2634	1.50128	1.09209	1.46722
AT1G51520	1.58257	1.29695	1.26421	1.50141	1.09218	1.4678
AT5G35935	1.58339	1.29739	1.26471	1.50183	1.09236	1.46862
AT4G00060	1.58415	1.29761	1.26519	1.50199	1.09282	1.46881
AT1G74890	1.58523	1.29811	1.26568	1.50223	1.09328	1.46931
AT3G48640	1.5858	1.29818	1.26591	1.50257	1.09363	1.46968
AT1G62914	1.58714	1.29857	1.26654	1.50328	1.0939	1.47032
AT3G27200	1.58744	1.29871	1.26726	1.50401	1.09425	1.47049
AT5G14840	1.58846	1.2989	1.26782	1.50478	1.09475	1.47063
AT2G03590	1.58874	1.29991	1.26833	1.50569	1.09515	1.47231
AT3G12220	1.58934	1.30007	1.26896	1.50597	1.09568	1.47357
AT3G18240	1.59079	1.30062	1.26948	1.50647	1.09589	1.47388
AT1G76620	1.59125	1.30149	1.26969	1.50743	1.09644	1.47417
AT3G49660	1.5915	1.3025	1.26993	1.50844	1.09674	1.47437
AT1G53200	1.59218	1.30261	1.27069	1.50987	1.09702	1.47604
AT3G60120	1.59287	1.30287	1.271	1.51029	1.09775	1.47714
AT2G18220	1.59335	1.30315	1.27117	1.51083	1.09807	1.47816
AT3G01960	1.59393	1.30371	1.27162	1.51173	1.09873	1.47878
AT1G01670	1.5943	1.30436	1.27229	1.51246	1.09893	1.47889
AT5G55250	1.59479	1.3049	1.27269	1.51305	1.09946	1.47928
AT5G61000	1.59534	1.30547	1.27318	1.5133	1.09995	1.48019
AT1G58210	1.59602	1.30559	1.27346	1.51376	1.10013	1.48097
AT1G09060	1.59675	1.3058	1.27375	1.51442	1.10095	1.48147
AT1G22550	1.59758	1.30643	1.27411	1.51501	1.10128	1.48172
AT1G18690	1.59853	1.30678	1.27507	1.51551	1.10152	1.48241
AT3G50650	1.59876	1.307	1.27579	1.5157	1.10178	1.483
AT5G61480	1.59948	1.30759	1.27644	1.51675	1.10214	1.4838
AT4G11000	1.60058	1.30781	1.27709	1.51719	1.10245	1.4848
AT1G70710	1.60145	1.30818	1.27727	1.51768	1.10299	1.48505
AT5G42830	1.60255	1.30878	1.27756	1.51805	1.10395	1.48558
AT1G71060	1.60323	1.30934	1.27839	1.51895	1.10454	1.48638
AT2G35480	1.60419	1.30951	1.27919	1.51945	1.10497	1.4866
AT1G55040	1.60467	1.30999	1.27978	1.51998	1.10512	1.48741
AT1G67000	1.60613	1.3103	1.28037	1.52044	1.10553	1.48754
AT3G20040	1.60684	1.31095	1.28108	1.52129	1.1061	1.48807
AT1G16090	1.60749	1.31118	1.28185	1.5225	1.1065	1.48853
AT3G58430	1.60798	1.31152	1.28259	1.52313	1.10679	1.48869
AT3G16890	1.60868	1.31184	1.28386	1.52358	1.10739	1.48896
AT5G09800	1.60926	1.3121	1.28428	1.52421	1.10773	1.4895
AT3G12870	1.60989	1.31289	1.28482	1.52477	1.10812	1.49044
AT4G09840	1.61044	1.31401	1.28532	1.52551	1.1085	1.49113
AT3G17340	1.6107	1.31449	1.28582	1.52559	1.10885	1.49154
AT5G46295	1.61107	1.31556	1.2868	1.52614	1.10933	1.49204
AT2G21380	1.61159	1.31568	1.28732	1.5263	1.11004	1.49234
AT5G06230	1.61225	1.31607	1.28776	1.52647	1.11074	1.49288
AT5G51200	1.61238	1.31673	1.28795	1.5277	1.11127	1.494
AT5G19090	1.6135	1.31722	1.28809	1.52833	1.11194	1.49486
AT1G19370	1.6144	1.3176	1.28894	1.52904	1.11224	1.49639
AT3G02040	1.61485	1.31787	1.28913	1.52963	1.11288	1.49688
AT2G45245	1.61553	1.31818	1.28936	1.53033	1.11322	1.49849
AT4G28280	1.6164	1.31854	1.28993	1.53067	1.11389	1.49886
AT1G03470	1.61678	1.31877	1.29028	1.53115	1.11414	1.4996
AT1G07780	1.61757	1.31913	1.29088	1.53237	1.11527	1.5001
AT4G04970	1.61815	1.31958	1.29156	1.53292	1.1154	1.50153
AT4G13000	1.6185	1.32052	1.29214	1.53325	1.11559	1.50238
AT1G04540	1.61937	1.32107	1.29242	1.53352	1.11569	1.50263
AT2G31340	1.61977	1.32147	1.29275	1.53426	1.11606	1.50297
AT1G55325	1.62081	1.32195	1.29306	1.53507	1.11683	1.50371
AT3G56730	1.62145	1.32208	1.29375	1.53541	1.11748	1.50409
AT1G11710	1.62172	1.32296	1.29433	1.53561	1.11785	1.50472
AT5G60408	1.6223	1.32307	1.29483	1.53618	1.11834	1.5055
AT3G04170	1.6228	1.3236	1.29569	1.53699	1.11865	1.50711
AT5G60910	1.62363	1.32413	1.29644	1.53728	1.119	1.50758
AT4G13030	1.62433	1.32436	1.29681	1.53782	1.11938	1.50797
AT3G06210	1.62522	1.32495	1.29702	1.53862	1.12025	1.50839
AT1G03905	1.62606	1.32638	1.29736	1.53926	1.12072	1.50876
AT1G60545	1.62619	1.32716	1.29819	1.53951	1.12088	1.50927
AT1G66730	1.62652	1.32749	1.29891	1.5399	1.12137	1.50988
AT3G07060	1.62686	1.32828	1.29935	1.54039	1.12175	1.51027
AT4G24480	1.62795	1.3287	1.29988	1.54124	1.1223	1.51106
AT3G19670	1.6288	1.3292	1.30044	1.54154	1.1225	1.51152
AT1G21160	1.62901	1.32984	1.30128	1.54253	1.12304	1.51189
AT2G36570	1.62986	1.33027	1.30169	1.54313	1.12312	1.51246
AT1G49840	1.6304	1.3315	1.30209	1.54393	1.12397	1.51297
AT5G66630	1.63074	1.332	1.30267	1.54468	1.12454	1.51363
AT1G62830	1.63148	1.33263	1.30315	1.54486	1.12482	1.51423
AT2G40113	1.63214	1.33378	1.30382	1.54576	1.1256	1.51475
AT2G24690	1.6324	1.33408	1.30461	1.54635	1.12593	1.51568
AT3G59765	1.63287	1.33439	1.30662	1.54681	1.12647	1.5159
AT4G23040	1.63353	1.33451	1.30709	1.54743	1.12661	1.51684
AT1G72855	1.63387	1.33485	1.30826	1.54784	1.12695	1.51714
AT2G04270	1.63429	1.33532	1.30854	1.54805	1.12735	1.51782
AT1G33720	1.63505	1.33561	1.30878	1.54871	1.12748	1.51862
AT4G10310	1.63541	1.33633	1.30911	1.54945	1.12804	1.51891
AT3G48580	1.63587	1.33684	1.30936	1.55011	1.1284	1.51927
AT5G13880	1.6367	1.33735	1.30961	1.55085	1.12877	1.52031
AT5G46680	1.63745	1.33774	1.30984	1.5516	1.12914	1.52059
AT5G39980	1.63801	1.33827	1.31017	1.55192	1.1294	1.52149
AT5G53430	1.63847	1.33866	1.31083	1.55239	1.12968	1.52211
AT2G41150	1.63917	1.33882	1.31225	1.5529	1.12999	1.52246
AT3G14330	1.63964	1.33932	1.31284	1.55354	1.13053	1.52334
AT4G04350	1.6408	1.34008	1.31307	1.55435	1.13063	1.52409
AT1G30220	1.64167	1.34042	1.31351	1.55492	1.13159	1.52461
AT2G20300	1.64349	1.34111	1.31387	1.55638	1.13199	1.52532
AT4G31400	1.64416	1.34166	1.3144	1.55726	1.13232	1.52574
AT4G14510	1.64461	1.34213	1.31505	1.55765	1.13286	1.52703
AT3G11950	1.64561	1.34243	1.31539	1.55798	1.13317	1.52749
AT4G10550	1.64598	1.34284	1.31575	1.55865	1.13358	1.52818
AT2G22450	1.64671	1.34304	1.31666	1.55931	1.13418	1.52899
AT3G61570	1.64735	1.34336	1.31741	1.56	1.13437	1.52943
AT1G03090	1.64844	1.34391	1.3178	1.56058	1.13486	1.52993
AT3G03350	1.6489	1.34413	1.31809	1.56092	1.1356	1.53056
AT4G32450	1.64936	1.34499	1.31848	1.5613	1.13568	1.53107
AT1G02010	1.65018	1.34535	1.31865	1.56147	1.13591	1.5312
AT5G39500	1.65089	1.34583	1.31922	1.56235	1.1368	1.53156
AT1G32090	1.65111	1.34651	1.31998	1.56279	1.13709	1.53192
AT1G05730	1.65128	1.34674	1.3203	1.56302	1.1379	1.53224
AT1G62760	1.6517	1.34689	1.32084	1.56378	1.13842	1.53282
AT5G13900	1.65223	1.34742	1.3215	1.56442	1.13923	1.53327
AT2G26890	1.6527	1.34752	1.32204	1.56478	1.13999	1.53398
AT3G60966	1.65305	1.34821	1.32249	1.5651	1.14026	1.5346
AT1G65481	1.65333	1.3489	1.32355	1.56538	1.14104	1.53478
AT1G67510	1.65413	1.34919	1.32394	1.56609	1.14173	1.53531
AT1G18485	1.65448	1.34978	1.32436	1.56674	1.14236	1.5355
AT1G30550	1.65522	1.34998	1.32459	1.56713	1.14275	1.53613
AT1G80450	1.65646	1.35076	1.32503	1.56741	1.14323	1.53619
AT1G80325	1.65672	1.35127	1.32535	1.56832	1.14383	1.53713
AT3G56690	1.65784	1.35192	1.32619	1.56845	1.14429	1.53717
AT1G25320	1.65831	1.35248	1.32631	1.56907	1.14461	1.53798
AT2G29490	1.65875	1.3529	1.32682	1.56934	1.14477	1.53855
AT2G27760	1.65913	1.35321	1.32714	1.56982	1.14498	1.53886
AT1G49320	1.65941	1.35397	1.32731	1.57026	1.14592	1.53911
AT3G22945	1.65965	1.35415	1.32793	1.57059	1.14627	1.53939
AT5G64030	1.65976	1.35431	1.32828	1.57113	1.14648	1.53999
AT1G12080	1.66026	1.35509	1.32875	1.57143	1.14688	1.54098
AT5G10820	1.66077	1.35553	1.3294	1.57167	1.14709	1.54132
AT1G49340	1.66118	1.35629	1.33025	1.57191	1.14758	1.54215
AT4G37400	1.66157	1.35726	1.33041	1.57272	1.14832	1.54269
AT1G80020	1.66201	1.35781	1.33072	1.5731	1.14854	1.54324
AT2G11140	1.66267	1.3582	1.33173	1.57335	1.14863	1.54374
AT1G77145	1.66304	1.3592	1.33241	1.57415	1.14905	1.54434
AT5G46330	1.66368	1.36035	1.33277	1.57473	1.14943	1.54465
AT3G55910	1.66416	1.36055	1.33297	1.57536	1.14956	1.54518
AT1G77250	1.66433	1.36096	1.33349	1.57568	1.1498	1.54605
AT3G18710	1.66451	1.36141	1.3339	1.57605	1.1505	1.54667
AT4G12240	1.66529	1.36187	1.33399	1.57636	1.15089	1.54749
AT5G01595	1.66558	1.36242	1.33438	1.57748	1.15122	1.54788
AT2G48140	1.6658	1.36269	1.33472	1.57771	1.15163	1.54799
AT1G79350	1.66657	1.36317	1.33531	1.57847	1.15238	1.54826
AT1G05830	1.66682	1.36445	1.33555	1.57911	1.15307	1.54938
AT1G49720	1.66757	1.36479	1.33587	1.57964	1.15344	1.5502
AT1G05320	1.6682	1.36535	1.33673	1.57988	1.15446	1.5509
AT1G74310	1.66882	1.36582	1.33751	1.58052	1.15493	1.5512
AT1G08290	1.6696	1.36667	1.33884	1.58097	1.15552	1.55249
AT2G31180	1.67036	1.36717	1.33979	1.58151	1.15584	1.55344
AT5G58580	1.67151	1.36757	1.34047	1.58237	1.15654	1.55373
AT5G11310	1.67196	1.36772	1.34084	1.584	1.15673	1.55399
AT4G34310	1.67263	1.36798	1.34105	1.58471	1.15706	1.55455
AT1G72410	1.67352	1.36863	1.3416	1.58554	1.15726	1.55479
AT1G12620	1.67401	1.36911	1.34205	1.58667	1.1578	1.55516
AT4G13970	1.67505	1.36945	1.34248	1.58743	1.15861	1.55634
AT3G54100	1.67544	1.37058	1.34296	1.58837	1.15932	1.55828
AT3G10490	1.6763	1.37189	1.34379	1.58936	1.15965	1.55835
AT5G44750	1.67663	1.37235	1.34428	1.58963	1.16035	1.55971
AT3G63510	1.67695	1.37271	1.34445	1.5899	1.16051	1.5602
AT3G19370	1.67774	1.37348	1.34514	1.59091	1.16087	1.5606
AT5G41790	1.67835	1.37391	1.34567	1.59103	1.16124	1.56123
AT5G52630	1.67857	1.37445	1.34603	1.5916	1.16143	1.56196
AT1G51790	1.67911	1.37514	1.34616	1.59193	1.16181	1.56267
AT4G33420	1.68012	1.37582	1.34665	1.59228	1.16225	1.56339
AT3G43430	1.68072	1.37652	1.34692	1.59292	1.16252	1.56376
AT5G51560	1.6812	1.37712	1.34805	1.59313	1.16347	1.565
AT5G66460	1.68132	1.3775	1.34845	1.59465	1.16374	1.56539
AT3G27520	1.68246	1.37792	1.34924	1.59562	1.16409	1.56654
AT4G29850	1.68291	1.37833	1.34954	1.59639	1.16473	1.56696
AT1G17750	1.68341	1.37869	1.35016	1.5971	1.16527	1.56724
AT3G25710	1.68376	1.37927	1.35049	1.59788	1.16562	1.5676
ATCG00770	1.68507	1.37959	1.35152	1.59837	1.166	1.56851
AT4G17180	1.68551	1.38003	1.35202	1.5996	1.16678	1.56945
AT4G12780	1.6859	1.38073	1.35243	1.60025	1.16763	1.5705
AT4G13540	1.68609	1.38119	1.35316	1.60104	1.16804	1.57122
AT3G43610	1.68689	1.38161	1.35375	1.60133	1.16844	1.57151
AT5G44490	1.688	1.38199	1.35402	1.60174	1.16922	1.57175
AT1G79220	1.68836	1.38258	1.35418	1.6036	1.16987	1.57207
AT2G28410	1.68896	1.38296	1.35472	1.60449	1.17029	1.57274
AT3G48850	1.68934	1.38306	1.35501	1.60527	1.17111	1.57318
AT4G30935	1.69043	1.38348	1.35554	1.60586	1.17205	1.57402
AT4G30230	1.69078	1.38385	1.35628	1.60636	1.17256	1.57455
AT5G19490	1.69128	1.38445	1.3568	1.60707	1.17319	1.57581
AT3G60510	1.69159	1.3851	1.35728	1.60761	1.17352	1.57621
AT3G59250	1.69277	1.38542	1.35768	1.60801	1.17376	1.57649
AT3G44440	1.69377	1.38613	1.35828	1.60854	1.17389	1.57702
AT3G59410	1.69415	1.38702	1.35873	1.60964	1.17454	1.57774
AT3G55370	1.69456	1.38777	1.35986	1.60997	1.17484	1.57827
AT3G21600	1.69582	1.3881	1.3603	1.61036	1.17518	1.57942
AT2G34357	1.69625	1.38881	1.36054	1.6105	1.17576	1.57996
ATCG00050	1.69687	1.38931	1.36084	1.61088	1.17642	1.58021
AT3G56970	1.69775	1.38986	1.36157	1.61122	1.17698	1.58099
AT4G35640	1.69904	1.39019	1.36198	1.61239	1.17753	1.58126
AT4G38330	1.69954	1.3909	1.36237	1.61303	1.17796	1.58308
AT2G18969	1.69989	1.3913	1.36308	1.61396	1.17861	1.58342
AT5G54720	1.70093	1.39175	1.36396	1.61498	1.17898	1.58405
AT3G60610	1.70179	1.39226	1.36438	1.61558	1.17984	1.5843
AT1G66940	1.7022	1.39262	1.36466	1.6162	1.18053	1.58504
AT1G10330	1.70267	1.39307	1.36497	1.61713	1.1808	1.58519
AT2G38380	1.70415	1.39428	1.36575	1.61773	1.18139	1.58565
AT4G19440	1.70442	1.39475	1.3663	1.61896	1.18189	1.58601
AT5G58510	1.70498	1.39525	1.36671	1.61979	1.18211	1.58666
AT3G06920	1.70528	1.3961	1.3671	1.62066	1.18242	1.58795
AT3G55340	1.70559	1.39663	1.36739	1.62161	1.18317	1.58817
AT3G20660	1.70632	1.39761	1.36816	1.6218	1.18365	1.5886
AT4G23940	1.7067	1.39792	1.36863	1.62219	1.1843	1.58889
AT2G33290	1.70741	1.39835	1.36895	1.62312	1.18527	1.58956
AT3G05730	1.7087	1.39931	1.37036	1.6235	1.18559	1.59013
AT5G49930	1.70957	1.39995	1.37069	1.62373	1.18601	1.59078
AT1G51170	1.71033	1.40023	1.37115	1.62478	1.1865	1.59107
AT5G03780	1.71222	1.4007	1.37156	1.62514	1.18732	1.59122
AT1G62310	1.71293	1.40105	1.37186	1.62581	1.18784	1.59183
AT2G29090	1.71323	1.40174	1.37225	1.62665	1.18831	1.59245
AT1G05460	1.71389	1.40199	1.37263	1.62729	1.18863	1.59334
AT2G05995	1.71414	1.40276	1.37287	1.62805	1.18925	1.59445
AT5G35930	1.71483	1.40283	1.37323	1.62886	1.18972	1.59469
AT2G42200	1.71543	1.40334	1.37339	1.62928	1.18998	1.59546
AT1G14780	1.71559	1.40361	1.3745	1.62955	1.19015	1.59601
AT5G03545	1.7163	1.40422	1.37543	1.62994	1.19048	1.59624
AT3G53232	1.71665	1.40447	1.37616	1.63005	1.19067	1.5985
AT4G30350	1.71711	1.40478	1.37629	1.63065	1.19114	1.59931
AT2G34640	1.71769	1.40557	1.37724	1.63105	1.19136	1.59963
AT5G12450	1.7183	1.40673	1.3777	1.63136	1.19163	1.60075
ATCG00750	1.71964	1.40691	1.37823	1.63215	1.19191	1.60124
AT3G43840	1.72067	1.40787	1.37894	1.63287	1.19203	1.60222
AT1G10060	1.7212	1.40813	1.37941	1.63412	1.19266	1.60284
AT4G03115	1.72196	1.40839	1.37957	1.63545	1.19327	1.60313
AT3G26460	1.72241	1.4089	1.38001	1.63595	1.19371	1.60457
AT4G21730	1.72286	1.40961	1.38022	1.63746	1.19394	1.60566
AT2G30420	1.7233	1.41066	1.38048	1.63791	1.19478	1.60611
AT1G79170	1.72401	1.41145	1.38089	1.6388	1.19507	1.6068
AT1G25450	1.72419	1.41199	1.38113	1.63925	1.19549	1.60726
AT4G23240	1.72469	1.41251	1.38163	1.64022	1.1962	1.60785
AT1G29160	1.72524	1.41342	1.38256	1.64063	1.19677	1.60801
AT3G48425	1.7255	1.4137	1.38296	1.64113	1.19725	1.60874
AT5G49700	1.7259	1.41388	1.38373	1.64154	1.19765	1.60912
AT3G53440	1.72678	1.41417	1.38447	1.6418	1.19852	1.60953
AT5G66620	1.72744	1.41449	1.38474	1.64223	1.19912	1.61031
AT1G67140	1.7281	1.41476	1.38522	1.64262	1.19972	1.61046
AT3G46370	1.72828	1.41533	1.38552	1.64363	1.20014	1.61088
AT4G22880	1.72918	1.41554	1.38603	1.64413	1.20033	1.61179
AT5G59740	1.72961	1.4159	1.38675	1.64456	1.20122	1.61213
AT4G26890	1.73015	1.41652	1.38746	1.64486	1.20163	1.6138
AT4G04330	1.73149	1.41711	1.38807	1.64536	1.20231	1.61421
AT2G25530	1.7324	1.41749	1.38847	1.64633	1.20261	1.61463
AT5G18370	1.733	1.41773	1.38878	1.64668	1.20301	1.61518
AT5G52410	1.73326	1.41797	1.38922	1.64733	1.20324	1.61537
AT5G07152	1.73409	1.41828	1.38949	1.64778	1.20345	1.6159
AT4G19890	1.73433	1.41873	1.39006	1.64877	1.20431	1.61649
AT2G24165	1.73466	1.41927	1.39095	1.64992	1.20475	1.61688
AT1G12460	1.7359	1.41949	1.39143	1.65007	1.2056	1.61743
AT4G37580	1.73677	1.41997	1.39222	1.6504	1.20621	1.61807
AT4G23700	1.73801	1.4204	1.39299	1.65131	1.2066	1.61909
AT5G20450	1.73834	1.42113	1.39332	1.6516	1.20685	1.61936
AT1G49160	1.73887	1.42139	1.39403	1.65199	1.20764	1.62007
AT1G22870	1.73965	1.42224	1.39424	1.65301	1.20797	1.62076
AT5G11040	1.74015	1.42281	1.39451	1.6536	1.2084	1.62084
AT5G04460	1.74087	1.42315	1.39558	1.6545	1.20865	1.62156
AT4G30680	1.7414	1.42358	1.3963	1.65485	1.20889	1.62226
AT3G11590	1.74157	1.4241	1.39713	1.65516	1.20946	1.62259
AT1G76710	1.74201	1.42459	1.39769	1.6559	1.21033	1.62343
AT5G01340	1.74242	1.42472	1.39862	1.65612	1.2106	1.62437
AT1G55915	1.74331	1.42587	1.39899	1.65752	1.21094	1.62517
AT1G23410	1.74382	1.42631	1.39947	1.65847	1.21175	1.62569
AT5G41160	1.74458	1.42671	1.39985	1.65885	1.21223	1.62731
AT5G50890	1.7453	1.42691	1.40044	1.65932	1.21268	1.62782
AT5G44562	1.74589	1.42715	1.4011	1.65998	1.21343	1.62838
AT5G55480	1.74622	1.42779	1.40171	1.66029	1.21364	1.62858
AT4G04370	1.74685	1.42816	1.40269	1.66109	1.21373	1.62868
AT1G45130	1.74704	1.42846	1.4035	1.66127	1.21468	1.62932
AT1G45110	1.74761	1.42942	1.4042	1.66166	1.21504	1.62971
AT5G65925	1.74867	1.42992	1.40524	1.66179	1.21576	1.63032
AT3G01720	1.74974	1.43078	1.40617	1.66256	1.21621	1.63109
AT3G47010	1.7508	1.43103	1.40641	1.6627	1.21644	1.63183
AT1G27020	1.75125	1.43181	1.40716	1.66298	1.21711	1.63241
AT1G79830	1.7522	1.43274	1.40756	1.6633	1.2174	1.63303
AT3G60040	1.75287	1.43317	1.40892	1.66477	1.21766	1.63415
AT1G60810	1.75357	1.4338	1.40917	1.66508	1.21834	1.63504
AT1G55990	1.75419	1.43464	1.40998	1.66534	1.21867	1.63547
AT5G61560	1.75508	1.43537	1.41044	1.66587	1.21907	1.63688
AT1G29170	1.75659	1.4358	1.41153	1.66646	1.21932	1.63725
AT1G49630	1.75681	1.43675	1.41225	1.66753	1.22009	1.63781
AT1G67210	1.7574	1.43723	1.41297	1.66827	1.22026	1.63807
AT4G19520	1.758	1.43773	1.41403	1.66885	1.22069	1.63868
AT2G35980	1.75824	1.43832	1.41439	1.66936	1.22099	1.63936
AT5G05790	1.75875	1.43879	1.41469	1.66955	1.2216	1.63995
AT5G39410	1.75923	1.43917	1.41482	1.67007	1.22218	1.64039
AT4G03430	1.76017	1.44	1.41502	1.67086	1.2224	1.641
AT1G70620	1.76142	1.44057	1.41566	1.67116	1.22271	1.6415
AT1G24530	1.76242	1.44079	1.4167	1.67154	1.22312	1.64183
AT1G67560	1.76319	1.44121	1.4175	1.67244	1.22344	1.64219
AT5G58340	1.76412	1.44183	1.41788	1.67258	1.22382	1.64313
AT5G06460	1.76472	1.44225	1.41839	1.67311	1.22446	1.64406
AT4G21100	1.76536	1.44364	1.4195	1.67394	1.22514	1.64479
AT5G60280	1.76561	1.44407	1.4199	1.67522	1.22574	1.64514
AT1G20920	1.76577	1.44433	1.42053	1.67551	1.22593	1.64588
AT3G14190	1.76734	1.44486	1.42117	1.67596	1.22636	1.64656
AT4G00305	1.76836	1.44552	1.4216	1.67656	1.22665	1.64786
AT5G06270	1.76914	1.44573	1.42218	1.67788	1.22716	1.64879
AT4G17750	1.76967	1.44609	1.42298	1.6784	1.22771	1.6493
AT5G54064	1.77031	1.44691	1.42413	1.67857	1.22809	1.64956
AT1G32860	1.77058	1.44779	1.42466	1.67941	1.22885	1.65033
AT3G20898	1.77083	1.44819	1.42526	1.67973	1.22923	1.65113
AT4G29140	1.77144	1.44839	1.42553	1.68014	1.22983	1.65141
AT1G01480	1.77165	1.44867	1.42589	1.68074	1.23052	1.65196
AT3G47090	1.77263	1.44926	1.42627	1.68163	1.23122	1.65388
AT5G52400	1.77305	1.4497	1.42661	1.68287	1.232	1.65465
AT5G04480	1.77395	1.45022	1.42704	1.68336	1.23217	1.65507
AT1G70630	1.77496	1.45037	1.42769	1.68464	1.23285	1.6554
AT1G74330	1.77592	1.45064	1.42817	1.68477	1.23323	1.65572
AT3G19180	1.77619	1.45099	1.42851	1.68607	1.23388	1.656
AT3G44716	1.7766	1.45162	1.42882	1.68754	1.23412	1.65647
AT5G62180	1.77693	1.45206	1.42905	1.68846	1.23549	1.65668
AT1G78030	1.77758	1.45338	1.42954	1.68912	1.23591	1.65727
AT1G09820	1.77835	1.45403	1.43	1.68954	1.23614	1.65778
AT5G06850	1.77981	1.45508	1.43061	1.69064	1.23617	1.65812
AT1G26190	1.78023	1.45604	1.43102	1.69187	1.23663	1.65901
AT1G48880	1.78137	1.45724	1.43192	1.69307	1.23705	1.65952
AT3G12690	1.78155	1.45778	1.43202	1.69339	1.23747	1.66027
AT3G43790	1.7822	1.45798	1.43229	1.69361	1.23775	1.6612
AT1G62120	1.78253	1.45899	1.43363	1.69423	1.23829	1.66215
AT5G59760	1.78412	1.45993	1.43383	1.69443	1.23892	1.66282
AT5G46530	1.7845	1.46037	1.43452	1.69511	1.23974	1.66314
AT4G15165	1.78557	1.46052	1.43495	1.69571	1.24007	1.66348
AT2G38465	1.78609	1.46097	1.43531	1.69634	1.24047	1.66399
AT1G01448	1.78725	1.46175	1.4363	1.69706	1.24166	1.66499
AT2G03140	1.78752	1.46229	1.43648	1.69775	1.24208	1.66633
AT4G00230	1.78823	1.46366	1.43744	1.69851	1.2423	1.66658
AT1G69230	1.78902	1.4643	1.43791	1.69888	1.24271	1.66741
AT1G61410	1.79015	1.46485	1.4384	1.6997	1.24305	1.66764
AT1G73960	1.79074	1.46608	1.43868	1.70035	1.24334	1.66796
AT1G02420	1.79227	1.4665	1.43958	1.70064	1.24358	1.66864
AT5G15280	1.79258	1.4677	1.43994	1.70091	1.2448	1.66895
AT5G13887	1.79282	1.46851	1.44041	1.70223	1.2454	1.6693
AT5G64860	1.79348	1.46922	1.4409	1.70307	1.24611	1.67022
AT3G42052	1.79402	1.46968	1.44212	1.70456	1.24704	1.67136
AT2G32390	1.79491	1.47037	1.44247	1.70524	1.24744	1.67182
AT4G31050	1.79592	1.47097	1.44317	1.70578	1.24813	1.67271
AT1G62680	1.79624	1.47126	1.4442	1.707	1.24844	1.67461
AT1G10240	1.79679	1.47254	1.44488	1.70767	1.24911	1.67536
AT2G42650	1.79746	1.47295	1.44514	1.70784	1.24987	1.67719
AT1G20550	1.79767	1.47337	1.44598	1.70822	1.25002	1.67791
AT1G01680	1.79797	1.47456	1.44632	1.70843	1.25044	1.67877
AT3G21780	1.79859	1.47509	1.4466	1.70921	1.25103	1.67947
AT1G76320	1.79915	1.47579	1.44731	1.70938	1.25191	1.67969
AT1G02700	1.79939	1.4762	1.44758	1.7103	1.25204	1.68048
AT5G23930	1.80022	1.4767	1.44792	1.71115	1.25216	1.6811
AT3G50100	1.80214	1.47716	1.44849	1.71149	1.25265	1.68155
AT1G51380	1.80272	1.47765	1.4493	1.71208	1.25362	1.68201
AT5G59990	1.80317	1.47811	1.44959	1.71289	1.25394	1.68348
AT1G62930	1.80408	1.47898	1.45019	1.71455	1.25413	1.68437
AT5G66480	1.80443	1.47981	1.45032	1.71483	1.25458	1.68524
AT1G32100	1.8052	1.48015	1.45081	1.71528	1.25509	1.68618
AT5G40020	1.80542	1.48061	1.45157	1.71625	1.25562	1.68655
AT1G20030	1.80575	1.48107	1.45198	1.71714	1.25605	1.68704
AT2G06210	1.80614	1.48182	1.45271	1.71738	1.25701	1.68791
AT1G69210	1.80723	1.48227	1.45357	1.71774	1.25753	1.68874
AT2G18780	1.80768	1.48255	1.45424	1.7185	1.25771	1.68934
AT1G55250	1.80831	1.48262	1.45482	1.71912	1.25812	1.68949
AT4G39270	1.80867	1.48307	1.45533	1.71988	1.2583	1.69063
AT1G06850	1.80921	1.4835	1.45596	1.72013	1.25873	1.69172
AT4G27480	1.80964	1.48401	1.45648	1.72096	1.25934	1.69307
AT3G27580	1.8104	1.48458	1.45751	1.72226	1.26002	1.69351
AT2G21070	1.81141	1.48502	1.45789	1.72286	1.26029	1.69457
AT1G30760	1.81199	1.48525	1.45816	1.72329	1.26062	1.69539
AT5G44660	1.81239	1.48601	1.45886	1.72396	1.26103	1.69586
AT5G16730	1.81344	1.48636	1.45916	1.72419	1.26134	1.69618
AT1G67720	1.81402	1.48699	1.4596	1.72514	1.26163	1.69646
AT2G20600	1.81473	1.48744	1.46053	1.72542	1.26231	1.69714
AT2G07680	1.81505	1.48767	1.46073	1.72625	1.26279	1.69774
AT2G40170	1.81525	1.48808	1.4611	1.72698	1.26381	1.69836
AT3G03970	1.81574	1.48861	1.46137	1.72777	1.26431	1.69921
AT3G04450	1.81739	1.48893	1.46201	1.72831	1.26467	1.70013
AT2G16850	1.81793	1.48964	1.46292	1.72854	1.2649	1.70044
AT2G30362	1.81827	1.49033	1.46342	1.72936	1.26581	1.70143
AT5G65900	1.81872	1.49062	1.46369	1.72969	1.26615	1.70186
AT5G10430	1.81905	1.49166	1.46417	1.73012	1.26627	1.70224
AT2G45360	1.81951	1.49213	1.46432	1.73092	1.26698	1.70358
AT5G49470	1.82015	1.49273	1.46486	1.73115	1.26764	1.70432
AT5G04980	1.8205	1.49307	1.46553	1.73177	1.26865	1.70485
AT1G10180	1.82096	1.49391	1.46643	1.73261	1.26901	1.70534
AT3G11760	1.82134	1.49428	1.46673	1.73324	1.26982	1.70577
AT3G19440	1.82278	1.49484	1.46739	1.73448	1.27109	1.70653
AT1G10340	1.82393	1.49544	1.46811	1.73472	1.27139	1.7082
AT3G62499	1.8243	1.49624	1.46854	1.73564	1.27177	1.70872
AT1G67420	1.82479	1.49651	1.46902	1.73591	1.27218	1.70933
AT1G53035	1.8255	1.4975	1.46941	1.7362	1.27307	1.70996
AT2G42365	1.8259	1.49778	1.47016	1.73682	1.27334	1.71063
AT4G38050	1.82633	1.49824	1.47071	1.73718	1.27405	1.7111
AT5G01400	1.8268	1.49883	1.47103	1.73803	1.27425	1.71249
AT1G07130	1.82708	1.49923	1.47155	1.7384	1.27448	1.71347
AT5G62480	1.82806	1.50023	1.47188	1.73867	1.27513	1.71383
AT2G36910	1.82887	1.50046	1.47219	1.739	1.27568	1.71493
AT5G14360	1.82907	1.50079	1.47257	1.73962	1.27618	1.71588
AT4G17215	1.82926	1.50168	1.47321	1.74012	1.27646	1.71678
AT2G29065	1.82991	1.50273	1.4737	1.74061	1.27753	1.71912
AT3G02820	1.83021	1.50367	1.47428	1.74091	1.27811	1.71985
AT3G60740	1.83103	1.50387	1.47476	1.74098	1.27863	1.72064
AT1G16445	1.83154	1.50461	1.47563	1.74135	1.27912	1.72222
AT2G42960	1.8319	1.50491	1.47599	1.74195	1.27938	1.723
AT3G52390	1.83221	1.50535	1.47665	1.7423	1.27987	1.7234
AT1G05120	1.83337	1.5056	1.47721	1.74265	1.28137	1.72403
AT5G04250	1.83436	1.50587	1.47742	1.74344	1.28163	1.72421
AT2G24530	1.8346	1.50618	1.47799	1.74442	1.28233	1.72506
AT2G28053	1.83516	1.50664	1.4786	1.74499	1.28288	1.72531
AT5G48670	1.83586	1.5072	1.47897	1.74559	1.28312	1.72674
AT3G50700	1.83664	1.50834	1.47919	1.74642	1.28363	1.72721
AT4G21170	1.83719	1.5088	1.47948	1.74714	1.28402	1.72855
AT1G27660	1.8376	1.50923	1.48042	1.74811	1.28465	1.72881
AT5G58550	1.83793	1.51033	1.48079	1.74855	1.28495	1.72911
AT5G48560	1.83877	1.51117	1.48096	1.7493	1.28529	1.72939
AT5G25590	1.83964	1.51155	1.48125	1.74995	1.28592	1.73033
AT2G37025	1.8404	1.51197	1.48204	1.75035	1.28621	1.73083
AT3G02980	1.84084	1.5124	1.4822	1.75098	1.28679	1.73168
AT1G26260	1.84148	1.51272	1.48256	1.75195	1.28775	1.73251
AT3G07280	1.84279	1.51338	1.48284	1.75242	1.28818	1.73272
AT5G14770	1.84355	1.5135	1.48429	1.75262	1.28896	1.73316
AT5G01542	1.84437	1.51412	1.48466	1.75325	1.28978	1.73379
AT5G22220	1.84531	1.51433	1.48561	1.75399	1.29022	1.73419
AT5G56730	1.84677	1.51491	1.48636	1.75477	1.29073	1.73473
AT5G53010	1.8472	1.51639	1.48678	1.75553	1.29107	1.73536
AT3G48210	1.84784	1.51717	1.48856	1.75574	1.29146	1.7359
AT2G02770	1.84896	1.51794	1.48886	1.75624	1.29172	1.73632
AT1G51940	1.84952	1.5183	1.48955	1.75641	1.29244	1.73708
AT4G24970	1.85003	1.51844	1.49047	1.75697	1.29285	1.73767
AT2G32900	1.85123	1.5189	1.49063	1.75902	1.29302	1.73816
AT5G38880	1.85203	1.5193	1.4909	1.75932	1.29331	1.73846
AT4G24110	1.85325	1.52104	1.49195	1.75957	1.29385	1.73865
AT1G24270	1.85462	1.52175	1.4923	1.76014	1.29432	1.7389
AT4G24175	1.8549	1.52293	1.49272	1.76133	1.29479	1.73967
AT1G78960	1.85561	1.52303	1.49334	1.76168	1.29535	1.7403
AT1G80700	1.85657	1.52337	1.49511	1.76276	1.296	1.74167
AT1G22830	1.85685	1.52378	1.49576	1.76365	1.29685	1.74217
AT5G22380	1.85772	1.52432	1.49635	1.76497	1.29709	1.74258
AT2G40530	1.85867	1.52502	1.49679	1.76604	1.29767	1.74314
AT1G75730	1.85895	1.52513	1.4974	1.76653	1.2982	1.74392
AT5G49010	1.85934	1.52572	1.49765	1.76698	1.29884	1.74438
AT1G03410	1.85963	1.52625	1.49869	1.76801	1.29935	1.74464
AT4G01460	1.85991	1.52652	1.49918	1.76836	1.29988	1.74638
AT3G56900	1.86135	1.52712	1.49953	1.76923	1.30049	1.74714
AT4G04790	1.86223	1.52775	1.50002	1.76985	1.30059	1.74776
AT5G47250	1.86273	1.52789	1.5004	1.77044	1.30114	1.7485
AT5G46090	1.86345	1.5282	1.5006	1.77114	1.30136	1.74942
AT4G31354	1.8643	1.5287	1.50098	1.77174	1.30219	1.74992
AT5G13270	1.86503	1.52913	1.50233	1.77197	1.30295	1.75105
AT4G36580	1.86619	1.52991	1.50277	1.77274	1.30335	1.75171
AT2G28570	1.86662	1.53011	1.50339	1.77324	1.30346	1.75187
AT5G67410	1.86762	1.53052	1.50399	1.77381	1.30436	1.75268
AT2G40930	1.86821	1.53089	1.50464	1.77459	1.30476	1.75299
AT5G19470	1.86868	1.53172	1.50575	1.77598	1.30533	1.75398
AT1G56060	1.86933	1.53208	1.50609	1.77662	1.30656	1.75443
AT2G20960	1.86961	1.5324	1.50645	1.77687	1.30693	1.75475
AT5G04840	1.87026	1.53326	1.50675	1.77725	1.3076	1.75543
AT4G20340	1.87082	1.53373	1.50757	1.77782	1.30819	1.75629
AT3G05850	1.87177	1.53442	1.50799	1.7784	1.30964	1.75691
AT1G28050	1.87296	1.53502	1.50921	1.77896	1.30996	1.75729
AT5G38565	1.87327	1.53536	1.50941	1.77934	1.31038	1.75795
AT4G30000	1.87388	1.53576	1.50981	1.78	1.311	1.75831
AT3G02800	1.87484	1.5364	1.51045	1.78022	1.31115	1.75863
AT5G28450	1.87557	1.53712	1.51078	1.78062	1.31174	1.76009
AT2G41730	1.87659	1.53756	1.5115	1.78105	1.31202	1.76093
AT1G61310	1.87696	1.53791	1.51204	1.78185	1.31232	1.7612
AT3G51760	1.87785	1.53835	1.51241	1.78277	1.31293	1.76166
AT1G24330	1.87895	1.53879	1.51273	1.78378	1.31351	1.76264
AT1G61030	1.87944	1.53897	1.51318	1.78452	1.31422	1.76326
AT1G01930	1.88014	1.53928	1.51394	1.78483	1.31472	1.76371
AT5G43810	1.88136	1.54006	1.51508	1.78627	1.31542	1.76409
AT3G49600	1.88236	1.54023	1.51544	1.78705	1.31594	1.76487
AT2G01130	1.88283	1.54109	1.51595	1.78749	1.31628	1.76557
AT1G46264	1.88319	1.54151	1.5164	1.78865	1.31659	1.76703
AT1G04295	1.88367	1.54197	1.51681	1.78899	1.31685	1.76726
AT1G06910	1.88412	1.54254	1.51734	1.78909	1.3171	1.76791
AT5G09420	1.88456	1.54275	1.51802	1.7897	1.3173	1.76876
AT1G79710	1.88493	1.54318	1.51887	1.79065	1.31818	1.76928
AT4G28650	1.88509	1.54344	1.51996	1.79102	1.31871	1.77146
AT2G28080	1.88589	1.54425	1.52117	1.79155	1.31964	1.77208
AT5G25475	1.88602	1.54462	1.52174	1.79198	1.32055	1.77252
AT5G26680	1.88667	1.54502	1.5224	1.79249	1.32083	1.77326
AT3G55840	1.88683	1.54533	1.52273	1.79326	1.32129	1.77348
AT1G09421	1.88721	1.54626	1.52346	1.79381	1.32151	1.77402
AT1G48120	1.88819	1.54745	1.52372	1.79429	1.32197	1.77433
AT3G54010	1.88837	1.5477	1.52407	1.79505	1.32237	1.77461
AT1G14630	1.88915	1.54798	1.52464	1.79592	1.32292	1.77538
AT2G42900	1.89005	1.54843	1.5249	1.79657	1.32396	1.77604
AT3G54910	1.8911	1.54853	1.52545	1.79701	1.32425	1.77676
AT5G38212	1.89167	1.54918	1.52577	1.79758	1.32463	1.77724
AT5G58130	1.89252	1.54998	1.52637	1.79827	1.32493	1.77829
AT2G21630	1.89287	1.55067	1.52693	1.79875	1.32525	1.77876
AT5G45060	1.89322	1.55132	1.52767	1.80047	1.32564	1.77935
AT1G13980	1.89383	1.55218	1.52824	1.80076	1.326	1.78062
AT3G27670	1.89466	1.55269	1.5288	1.80097	1.32692	1.78096
AT3G57680	1.89562	1.55342	1.52956	1.80137	1.32742	1.78136
AT1G29750	1.89658	1.55421	1.52986	1.80204	1.32795	1.78212
AT1G78820	1.89715	1.55442	1.53027	1.80225	1.32833	1.78434
AT2G04032	1.89796	1.55478	1.53148	1.80294	1.32895	1.78569
AT3G08943	1.89876	1.55566	1.53237	1.80314	1.32917	1.78593
AT3G19570	1.89991	1.55601	1.53269	1.80395	1.32955	1.78677
AT2G38970	1.90068	1.55675	1.533	1.80495	1.32986	1.78761
AT5G55760	1.90108	1.55713	1.5336	1.80531	1.33054	1.788
AT3G52100	1.90148	1.55736	1.5346	1.80558	1.33109	1.78862
AT3G23230	1.90217	1.55773	1.53525	1.80619	1.33146	1.78964
AT4G23990	1.90329	1.55951	1.53624	1.80673	1.33187	1.79004
AT5G57830	1.9046	1.56045	1.53683	1.80733	1.33227	1.79069
AT1G50700	1.90554	1.56119	1.53735	1.80775	1.33274	1.79137
AT4G11440	1.90607	1.56171	1.53792	1.80881	1.33344	1.79188
AT4G10380	1.90668	1.56231	1.5391	1.80995	1.33384	1.79225
AT4G38420	1.90741	1.56337	1.53944	1.81041	1.33412	1.79259
AT5G51660	1.90819	1.56361	1.53988	1.81134	1.33422	1.79295
AT3G07520	1.90843	1.56416	1.54008	1.81188	1.33447	1.79378
AT3G09360	1.90976	1.56475	1.54072	1.81217	1.33501	1.79453
AT5G02420	1.91044	1.56492	1.54171	1.8125	1.33572	1.79523
AT3G61360	1.91061	1.56532	1.5421	1.81269	1.33706	1.79698
AT2G39260	1.91105	1.5659	1.54337	1.81374	1.33755	1.79815
AT3G59320	1.91159	1.56651	1.54387	1.81449	1.33874	1.79961
AT3G12530	1.91216	1.56742	1.54427	1.81469	1.33933	1.80075
AT2G12190	1.91285	1.56773	1.54492	1.81508	1.33999	1.80101
AT3G10110	1.91318	1.5686	1.54651	1.81515	1.34026	1.80189
AT1G54540	1.91383	1.56895	1.54701	1.81545	1.34082	1.80289
AT5G37340	1.9142	1.56929	1.54786	1.81577	1.3413	1.80397
AT3G55515	1.91477	1.56961	1.54814	1.8161	1.34173	1.80471
AT1G14170	1.9156	1.56994	1.54855	1.817	1.34193	1.80559
AT1G19290	1.91593	1.57019	1.54921	1.81733	1.34259	1.80634
AT5G64220	1.91663	1.571	1.55046	1.81801	1.34309	1.80711
AT5G18980	1.91699	1.57173	1.55081	1.81895	1.34353	1.8082
AT3G15150	1.91752	1.57239	1.55177	1.81926	1.34413	1.80891
AT4G16144	1.91771	1.57277	1.55249	1.81952	1.3443	1.80975
AT5G67450	1.91856	1.57312	1.55284	1.82015	1.34469	1.81026
ATMG01170	1.91932	1.57378	1.55362	1.82116	1.34543	1.81062
AT1G23460	1.91986	1.57438	1.55424	1.8222	1.34597	1.81086
AT4G03540	1.92026	1.57476	1.55483	1.82276	1.34655	1.81109
AT1G80190	1.92146	1.57605	1.55516	1.82327	1.34723	1.81318
AT1G05210	1.92172	1.57634	1.55599	1.82375	1.3476	1.81323
AT2G24650	1.92258	1.57752	1.55658	1.82397	1.3484	1.81398
AT2G01330	1.92277	1.57885	1.55675	1.82463	1.34907	1.81425
AT1G64790	1.92386	1.57904	1.55714	1.82541	1.34967	1.81537
AT4G35940	1.92475	1.5798	1.55789	1.82644	1.3503	1.81569
AT1G25430	1.92524	1.58011	1.5581	1.82672	1.35058	1.81609
AT1G15165	1.92613	1.58042	1.55888	1.82759	1.35088	1.81766
AT4G00590	1.92676	1.58122	1.55999	1.82835	1.35128	1.81781
AT4G23450	1.92725	1.58155	1.56037	1.82965	1.35174	1.81891
AT2G22260	1.92823	1.58198	1.56051	1.82998	1.35211	1.81971
AT2G22390	1.9288	1.58224	1.56117	1.83063	1.35259	1.8206
AT5G58040	1.92921	1.58289	1.56193	1.83093	1.35291	1.82115
AT3G21010	1.92966	1.58339	1.56244	1.83168	1.3531	1.82161
AT5G40570	1.93006	1.58383	1.5627	1.83282	1.35352	1.82225
AT2G17280	1.93068	1.58469	1.56317	1.83337	1.35399	1.82324
AT2G22840	1.93123	1.58538	1.56356	1.83369	1.35465	1.82379
AT1G69070	1.93191	1.58573	1.56384	1.83386	1.35492	1.82475
AT4G30790	1.93217	1.58599	1.56456	1.83401	1.35516	1.8253
AT1G05760	1.93283	1.58707	1.56543	1.83471	1.35573	1.8262
AT1G18840	1.93352	1.58765	1.56585	1.83583	1.35641	1.82726
AT1G67810	1.93432	1.58817	1.56651	1.83644	1.35683	1.82763
AT3G11150	1.93544	1.58905	1.56684	1.83715	1.35712	1.82851
AT1G80060	1.93593	1.58981	1.56746	1.83755	1.3577	1.82873
AT1G52520	1.93642	1.59027	1.56808	1.83765	1.35789	1.82935
AT3G51650	1.9372	1.59051	1.56865	1.83853	1.35829	1.82973
AT3G24560	1.93815	1.59096	1.56916	1.83893	1.35904	1.8306
AT5G06000	1.93886	1.59197	1.56979	1.83995	1.35944	1.83158
AT5G05660	1.93957	1.59288	1.57061	1.84039	1.36034	1.83215
AT5G05630	1.94047	1.59428	1.57138	1.84094	1.36083	1.8324
AT1G77660	1.94107	1.59501	1.57212	1.84214	1.36183	1.83262
AT1G62670	1.94136	1.5961	1.57241	1.84269	1.36268	1.8338
AT3G16840	1.94158	1.59633	1.57277	1.84326	1.3629	1.83463
AT3G62040	1.94216	1.59669	1.57347	1.8439	1.36343	1.83566
AT1G31150	1.94282	1.59705	1.57431	1.84434	1.36487	1.83616
AT4G33240	1.94393	1.59769	1.57474	1.84472	1.36557	1.83656
AT1G75360	1.94499	1.59816	1.57505	1.84569	1.36602	1.83704
AT1G01010	1.94598	1.59984	1.5754	1.84605	1.36631	1.83792
AT5G46500	1.94706	1.60054	1.57569	1.8467	1.36733	1.83821
AT1G20960	1.94821	1.601	1.57603	1.84753	1.36754	1.83873
AT3G17450	1.94841	1.60116	1.57654	1.84814	1.36845	1.83907
AT1G46480	1.94902	1.60172	1.57737	1.84988	1.36925	1.83941
AT1G62990	1.94985	1.60179	1.5777	1.85021	1.36994	1.83974
AT5G47810	1.9501	1.60221	1.57825	1.85122	1.37047	1.8402
AT2G37430	1.95072	1.60246	1.57949	1.85168	1.37103	1.84093
AT5G40600	1.95091	1.60312	1.57969	1.85225	1.3715	1.84165
AT3G53510	1.9518	1.60365	1.58027	1.85267	1.37188	1.84224
AT1G11060	1.95207	1.60458	1.58062	1.85333	1.37245	1.84256
AT4G31270	1.95295	1.60533	1.58072	1.85421	1.37338	1.8429
AT1G05300	1.9538	1.606	1.58115	1.85475	1.37357	1.84369
AT4G01860	1.95463	1.60669	1.58177	1.85491	1.37417	1.84439
AT1G10586	1.95592	1.6074	1.58202	1.85614	1.37503	1.84493
AT2G32830	1.95623	1.60794	1.58222	1.8568	1.37614	1.84526
ATMG00060	1.95657	1.60864	1.58268	1.85736	1.37641	1.84563
AT2G46560	1.95727	1.60949	1.58327	1.85806	1.37692	1.84723
AT5G04620	1.95795	1.61011	1.58392	1.85847	1.37739	1.8482
AT3G48058	1.95848	1.61053	1.58441	1.85895	1.37829	1.84882
AT5G50990	1.959	1.61079	1.58463	1.85933	1.37899	1.85033
AT4G04180	1.96042	1.61118	1.58523	1.85951	1.37941	1.85097
AT3G59530	1.9605	1.61144	1.58606	1.86017	1.38062	1.8529
AT3G01160	1.96109	1.61165	1.58648	1.86055	1.38094	1.85387
AT1G17230	1.96151	1.61224	1.58692	1.86072	1.38141	1.85418
AT4G04220	1.96269	1.61283	1.58736	1.86152	1.38214	1.85497
AT1G18900	1.96309	1.6134	1.58793	1.86197	1.38314	1.85549
AT2G28315	1.96352	1.61378	1.58826	1.86274	1.38323	1.85608
AT5G62940	1.96395	1.61406	1.58936	1.86334	1.38357	1.85668
AT3G30214	1.96479	1.61445	1.58969	1.86463	1.38421	1.85752
AT2G36050	1.96579	1.61478	1.59044	1.86485	1.38475	1.85813
AT5G20170	1.96665	1.61548	1.59079	1.86519	1.38529	1.8587
AT1G79540	1.96765	1.61586	1.59177	1.8654	1.38659	1.85915
AT5G02820	1.96813	1.61633	1.5919	1.86577	1.38717	1.85942
AT3G57780	1.96886	1.6174	1.59207	1.86681	1.38766	1.86035
AT3G23900	1.9694	1.61793	1.59234	1.86729	1.38789	1.86061
AT5G61390	1.96986	1.61818	1.59269	1.86789	1.3889	1.8611
AT5G13530	1.97039	1.61897	1.59354	1.86863	1.38955	1.86148
AT4G39160	1.97081	1.61996	1.5937	1.86956	1.39039	1.86274
AT4G25434	1.97139	1.62055	1.59437	1.86989	1.39116	1.86508
AT2G44790	1.97179	1.62153	1.59511	1.87018	1.39129	1.86566
AT2G14680	1.972	1.62184	1.59566	1.87059	1.39267	1.86603
AT5G43560	1.97284	1.62249	1.59616	1.87118	1.39329	1.86704
AT1G25211	1.97492	1.62298	1.59681	1.87153	1.39352	1.86722
AT1G12430	1.97516	1.62346	1.59759	1.87262	1.39376	1.86782
AT5G04200	1.976	1.62413	1.59861	1.87298	1.3941	1.86817
AT4G31240	1.97657	1.62465	1.59913	1.87382	1.39484	1.86905
AT1G32190	1.97706	1.6253	1.59949	1.87505	1.39531	1.86939
AT1G51965	1.9778	1.62586	1.59985	1.87541	1.39542	1.87063
AT3G06340	1.97899	1.62637	1.60111	1.8757	1.39561	1.87139
AT5G02080	1.97937	1.62647	1.60188	1.87616	1.39581	1.87244
AT4G15710	1.98073	1.62683	1.60299	1.87639	1.39646	1.8727
AT1G01380	1.98158	1.62769	1.60352	1.87745	1.3968	1.87304
AT2G25660	1.98233	1.62889	1.6039	1.87782	1.39734	1.87342
AT3G51720	1.98302	1.62967	1.60475	1.87808	1.39797	1.874
AT2G35170	1.98353	1.62997	1.60492	1.87821	1.39854	1.87415
AT5G52740	1.98446	1.63067	1.60553	1.87846	1.3986	1.8749
AT4G29540	1.98509	1.63102	1.60632	1.87872	1.39943	1.87541
AT3G49920	1.98594	1.63165	1.60689	1.87937	1.39993	1.87622
AT5G58960	1.98648	1.63237	1.60719	1.87996	1.40047	1.87697
AT4G02020	1.9867	1.63325	1.60762	1.881	1.40099	1.87802
AT3G06250	1.98729	1.63411	1.60827	1.88168	1.40181	1.87858
AT3G58975	1.98764	1.63487	1.60902	1.88206	1.40208	1.87921
AT1G16530	1.98784	1.6356	1.60928	1.88261	1.40231	1.87974
AT5G37660	1.98908	1.63608	1.60966	1.88359	1.40295	1.88064
AT3G24810	1.98933	1.63635	1.60998	1.88413	1.40331	1.88095
AT4G40070	1.99072	1.63663	1.61075	1.8846	1.40364	1.88142
AT4G20060	1.99108	1.63704	1.61136	1.88527	1.40391	1.88196
ATMG01360	1.99149	1.63747	1.61155	1.88601	1.40426	1.88236
ATMG01120	1.99229	1.63777	1.61207	1.88634	1.40478	1.88332
AT1G77880	1.99291	1.63791	1.61296	1.88683	1.40517	1.88373
AT4G30410	1.99371	1.63844	1.61326	1.88784	1.40577	1.88459
AT4G04920	1.99463	1.63882	1.6136	1.8881	1.40623	1.88502
AT2G01740	1.9963	1.63914	1.61421	1.88903	1.4066	1.88538
AT3G46150	1.99701	1.6395	1.61455	1.89003	1.40742	1.88624
AT1G01640	1.99745	1.64038	1.61492	1.89023	1.40774	1.88655
AT4G12670	1.99811	1.64089	1.61539	1.89111	1.40833	1.88838
AT4G32670	1.99858	1.64144	1.61605	1.8915	1.40884	1.88894
AT4G33440	1.99918	1.64192	1.61655	1.89238	1.40957	1.88969
AT5G39900	2.00006	1.64253	1.61701	1.89407	1.40992	1.88998
AT1G19540	2.00038	1.64297	1.61799	1.89513	1.41057	1.89178
AT5G16820	2.00115	1.64321	1.61925	1.89573	1.41077	1.89217
AT1G21630	2.00198	1.64348	1.61967	1.89602	1.41155	1.89276
AT4G09020	2.00262	1.6441	1.62014	1.89664	1.41212	1.89322
AT3G28260	2.00312	1.64461	1.62096	1.89817	1.41286	1.89348
AT1G76760	2.00357	1.64484	1.62138	1.89835	1.41336	1.89407
AT1G19100	2.00456	1.64536	1.62204	1.89872	1.41363	1.89431
AT2G31600	2.00497	1.6464	1.62248	1.89923	1.41422	1.89464
AT1G63130	2.00617	1.647	1.62266	1.90005	1.41455	1.89542
AT2G36740	2.00651	1.64766	1.6237	1.90048	1.41482	1.89625
AT2G12462	2.0067	1.64809	1.62433	1.90099	1.41523	1.89709
AT4G09012	2.0071	1.64908	1.62456	1.90157	1.41569	1.8978
AT4G20740	2.00788	1.64988	1.62492	1.90227	1.41682	1.89838
AT1G45332	2.00908	1.65015	1.62536	1.90255	1.41724	1.89968
AT1G32240	2.00987	1.65046	1.62576	1.90288	1.41858	1.90028
AT5G24710	2.01009	1.65085	1.62599	1.90358	1.41938	1.90108
AT3G55890	2.01079	1.65167	1.62648	1.90467	1.41968	1.90141
AT1G32610	2.0113	1.65228	1.6272	1.90522	1.42037	1.90156
AT5G64950	2.01199	1.65259	1.62771	1.90585	1.4208	1.90162
AT1G56020	2.01231	1.65319	1.6281	1.90708	1.42147	1.90207
AT4G03140	2.01378	1.65352	1.62881	1.9079	1.42176	1.90268
AT1G01570	2.01489	1.65374	1.6292	1.90876	1.42218	1.90297
AT1G71990	2.01564	1.65516	1.6294	1.90907	1.42273	1.90307
AT4G19810	2.01638	1.6558	1.63024	1.90924	1.42288	1.90383
AT5G57840	2.01722	1.65634	1.63045	1.90983	1.42298	1.90432
AT3G23109	2.01846	1.6569	1.63091	1.91073	1.42339	1.90484
AT2G25060	2.01891	1.65718	1.63114	1.91152	1.42433	1.90521
AT4G34138	2.01989	1.65786	1.63157	1.91184	1.42518	1.90554
AT5G52910	2.02018	1.65836	1.63216	1.91301	1.42538	1.90598
AT5G64970	2.02063	1.65958	1.63286	1.91345	1.42588	1.90698
AT2G26920	2.02155	1.65979	1.63358	1.91389	1.42615	1.90719
AT1G12200	2.02225	1.66004	1.63407	1.91433	1.42674	1.90747
AT5G16570	2.02246	1.66059	1.63458	1.91527	1.42709	1.90859
AT1G31480	2.02361	1.66098	1.63495	1.91541	1.42769	1.90884
AT4G32010	2.0242	1.66122	1.63571	1.91625	1.4282	1.90906
AT5G65390	2.02509	1.66192	1.63609	1.91721	1.4288	1.90974
AT1G03190	2.02601	1.66232	1.63669	1.91731	1.4295	1.91048
AT5G37590	2.02668	1.66298	1.63738	1.91933	1.42971	1.91154
AT3G58100	2.02739	1.66356	1.63798	1.92	1.43034	1.91221
AT4G15990	2.02826	1.6642	1.63914	1.92051	1.43115	1.91236
AT4G25480	2.02895	1.66448	1.63991	1.92117	1.43196	1.91302
AT4G15620	2.02953	1.66506	1.64033	1.92194	1.43206	1.91356
AT1G36940	2.03027	1.66553	1.64107	1.92222	1.43251	1.91421
AT1G23890	2.03077	1.66636	1.64158	1.92316	1.43299	1.91458
AT5G07790	2.03112	1.66742	1.64214	1.92353	1.43329	1.91491
AT2G18620	2.03196	1.66804	1.64272	1.92409	1.43351	1.91539
AT5G65410	2.03264	1.66856	1.64306	1.92453	1.43428	1.91624
AT2G43500	2.03287	1.66941	1.64342	1.92503	1.43475	1.91661
AT1G08160	2.03355	1.66973	1.64469	1.92585	1.43501	1.91712
AT3G08880	2.03446	1.67044	1.64552	1.92735	1.43554	1.91802
AT4G30940	2.03521	1.67086	1.64624	1.92772	1.43596	1.91974
AT2G45760	2.03579	1.67109	1.64657	1.92925	1.43641	1.92001
AT5G27450	2.03627	1.67188	1.64759	1.93096	1.4368	1.92072
AT5G19670	2.03808	1.67209	1.64796	1.93153	1.43712	1.92096
AT3G18850	2.03882	1.67321	1.64845	1.93188	1.43735	1.92161
AT1G55365	2.0393	1.6735	1.64901	1.93282	1.43819	1.92208
AT1G80870	2.03979	1.6741	1.64954	1.93319	1.43868	1.92307
AT4G35420	2.04028	1.67479	1.65029	1.93385	1.43925	1.92388
AT1G02400	2.04129	1.67521	1.65063	1.93457	1.43979	1.92481
AT3G47570	2.04214	1.6756	1.65092	1.9358	1.44055	1.92555
AT5G19100	2.04318	1.67582	1.65114	1.93603	1.44067	1.9264
AT2G46940	2.04405	1.67639	1.65203	1.93681	1.4413	1.92678
AT3G60290	2.04523	1.67704	1.65354	1.93721	1.44162	1.9273
AT1G49040	2.04608	1.67728	1.6539	1.93787	1.44202	1.92861
AT3G12340	2.0467	1.67795	1.65441	1.93822	1.44241	1.92933
AT1G79310	2.04743	1.67882	1.65542	1.93898	1.44263	1.93028
AT5G08240	2.04906	1.67908	1.65617	1.93935	1.44294	1.93115
AT5G41650	2.04982	1.68007	1.65714	1.94052	1.44325	1.93206
AT3G57980	2.05063	1.68031	1.65775	1.94165	1.44362	1.93232
AT4G16100	2.05109	1.68071	1.65803	1.94279	1.44392	1.93259
AT5G58790	2.0524	1.68165	1.65848	1.94314	1.44445	1.93298
AT3G46080	2.05416	1.68258	1.65897	1.94431	1.445	1.9362
AT1G68610	2.05529	1.68304	1.65972	1.94469	1.44552	1.93742
AT5G42200	2.05607	1.68378	1.65996	1.94504	1.44585	1.93765
AT5G11930	2.05621	1.68427	1.66056	1.94529	1.44672	1.93836
AT1G36680	2.0568	1.68586	1.66085	1.94569	1.44687	1.93889
ATMG01220	2.0573	1.68611	1.66123	1.94656	1.44733	1.93908
AT4G16900	2.05844	1.68688	1.6614	1.94748	1.4482	1.94005
AT5G41580	2.05865	1.6875	1.66199	1.94803	1.44873	1.94121
AT5G35410	2.05926	1.68765	1.66239	1.9482	1.44901	1.94184
AT5G41150	2.05992	1.68796	1.66308	1.94864	1.44948	1.94259
AT5G47440	2.06081	1.68876	1.66401	1.94983	1.44986	1.94386
AT3G10960	2.0611	1.68972	1.66467	1.9502	1.45041	1.94426
AT2G01460	2.06154	1.69005	1.66549	1.951	1.45083	1.94503
AT4G15570	2.06197	1.69067	1.66635	1.95119	1.45113	1.94535
AT3G02840	2.0623	1.69158	1.6668	1.95164	1.45144	1.94621
AT3G54980	2.06268	1.69231	1.66751	1.95205	1.45171	1.9467
AT5G20930	2.06315	1.69271	1.66815	1.95238	1.45239	1.94675
AT5G40340	2.06381	1.69316	1.66885	1.95268	1.45291	1.94737
AT5G47400	2.06462	1.69378	1.66918	1.95425	1.45337	1.94837
AT3G51320	2.0657	1.69422	1.66958	1.95463	1.45355	1.94909
AT5G37530	2.06635	1.69474	1.66999	1.95541	1.45426	1.94931
AT5G44980	2.06759	1.69537	1.67066	1.95586	1.45443	1.95003
AT1G30040	2.06835	1.69602	1.67096	1.95617	1.45466	1.95047
AT2G47890	2.0688	1.69679	1.67143	1.95707	1.45494	1.95193
AT5G01740	2.06943	1.6978	1.67182	1.95749	1.45549	1.9531
AT4G34360	2.07078	1.69855	1.67199	1.95788	1.45617	1.95396
AT3G61850	2.07109	1.69955	1.67285	1.958	1.45644	1.95479
AT1G34420	2.07191	1.69998	1.67378	1.95849	1.45654	1.95544
AT5G07180	2.07239	1.70135	1.67479	1.95906	1.45712	1.95622
AT1G55690	2.07276	1.70235	1.67551	1.95987	1.45811	1.95697
AT2G39480	2.07311	1.70272	1.67606	1.96073	1.45861	1.95708
AT1G32120	2.07403	1.70301	1.67631	1.96182	1.45877	1.95722
AT5G13590	2.07435	1.70318	1.67675	1.96301	1.45925	1.95791
AT4G01920	2.07581	1.70398	1.67732	1.96325	1.45967	1.95978
AT1G12330	2.07607	1.70421	1.67816	1.96427	1.4601	1.96073
AT1G31935	2.0772	1.7048	1.67891	1.96468	1.46077	1.9617
AT3G13440	2.07785	1.70565	1.67962	1.96567	1.4611	1.96234
AT5G40550	2.07824	1.7062	1.68006	1.96605	1.46136	1.96318
AT4G02280	2.07849	1.70662	1.6803	1.96638	1.46181	1.96361
AT2G17830	2.07936	1.70753	1.68125	1.9668	1.46277	1.96367
AT4G10570	2.07949	1.70811	1.68161	1.9674	1.46351	1.96432
AT1G50410	2.08093	1.70874	1.68277	1.96854	1.46372	1.96502
AT2G20850	2.08169	1.7104	1.68322	1.96981	1.46417	1.96573
AT3G03340	2.08233	1.71132	1.68366	1.97025	1.46552	1.96696
AT1G23880	2.0839	1.71165	1.68417	1.9707	1.46585	1.96812
AT5G58690	2.08439	1.71226	1.68466	1.97126	1.46624	1.96925
AT5G35450	2.08492	1.71303	1.68502	1.97181	1.4669	1.97066
AT1G53350	2.08544	1.71329	1.68555	1.97233	1.46733	1.97099
AT4G38545	2.08588	1.71405	1.68589	1.97373	1.46758	1.97226
AT4G24790	2.08668	1.7144	1.68677	1.97487	1.46796	1.97251
AT1G18270	2.08687	1.7146	1.68743	1.9758	1.4683	1.97323
AT4G16515	2.0874	1.7151	1.68816	1.97643	1.46862	1.97391
AT1G12790	2.08804	1.71594	1.68915	1.97697	1.46938	1.97464
AT5G19730	2.08875	1.71704	1.68974	1.97723	1.46959	1.97534
AT1G15150	2.08953	1.71741	1.69023	1.97806	1.47078	1.97726
AT5G59070	2.08984	1.71801	1.69071	1.97846	1.47135	1.97879
AT4G21940	2.09039	1.71839	1.69125	1.97909	1.47157	1.9795
AT5G50170	2.09084	1.71857	1.69156	1.97988	1.47202	1.98009
AT4G00310	2.09135	1.71885	1.69188	1.98047	1.47243	1.98052
AT1G80690	2.09242	1.71924	1.69196	1.9814	1.47295	1.98088
AT1G17070	2.09276	1.71968	1.69287	1.98194	1.47342	1.98121
AT2G07774	2.09298	1.72027	1.69322	1.98248	1.47412	1.98188
AT4G11845	2.09333	1.72045	1.69409	1.98343	1.47459	1.98303
AT1G55350	2.09387	1.72104	1.69481	1.98395	1.47512	1.98311
AT3G16030	2.09498	1.72154	1.69563	1.98449	1.47534	1.98431
AT1G62030	2.09554	1.72273	1.6965	1.98521	1.47571	1.98505
AT2G35700	2.09603	1.72314	1.69679	1.98662	1.47648	1.98684
AT3G18485	2.09721	1.72341	1.69727	1.9879	1.47681	1.98764
AT5G07770	2.09756	1.7235	1.69814	1.9883	1.47747	1.98822
AT2G15780	2.09871	1.72357	1.69867	1.98896	1.47774	1.98871
AT1G04520	2.09977	1.72403	1.69901	1.98927	1.47832	1.98955
AT2G32250	2.09996	1.725	1.7003	1.98965	1.47912	1.99025
AT5G08630	2.1006	1.72523	1.70095	1.98982	1.47931	1.99107
AT2G01830	2.10088	1.72558	1.70203	1.99071	1.48011	1.99137
AT4G30980	2.1011	1.72615	1.70236	1.9919	1.4804	1.99216
AT5G61910	2.10208	1.7269	1.70304	1.99299	1.48076	1.99327
AT5G19210	2.10275	1.72732	1.70377	1.99342	1.48089	1.99413
AT1G14770	2.10318	1.72813	1.70496	1.99383	1.48156	1.995
AT5G08350	2.10375	1.72888	1.70579	1.99464	1.4818	1.9955
AT2G40240	2.10498	1.72936	1.7062	1.99668	1.48227	1.99586
AT3G25030	2.10528	1.72965	1.70659	1.99778	1.48285	1.99629
AT4G36680	2.10578	1.72989	1.70689	1.99845	1.48327	1.99721
AT2G41210	2.1065	1.72997	1.70744	1.9992	1.48393	1.99747
AT1G51035	2.10688	1.73045	1.70815	2.00062	1.48521	1.99854
AT2G22790	2.10764	1.73123	1.70941	2.00164	1.48565	1.99921
AT5G64320	2.10854	1.73194	1.71018	2.00262	1.48578	1.99953
AT1G20691	2.10994	1.73303	1.71088	2.00324	1.48656	2.00019
AT1G55525	2.11059	1.7338	1.7112	2.00417	1.4869	2.00091
AT1G20120	2.11115	1.73432	1.71192	2.00458	1.48798	2.00164
AT1G76950	2.11265	1.73534	1.71243	2.00509	1.48848	2.00303
AT1G19190	2.11346	1.73563	1.71297	2.00537	1.48884	2.00332
AT1G10050	2.11524	1.73643	1.71351	2.00603	1.48913	2.00413
AT1G56670	2.11631	1.73688	1.71435	2.00662	1.48954	2.00523
AT5G62500	2.1167	1.73834	1.71452	2.00729	1.49	2.00582
AT4G03550	2.11773	1.73919	1.71542	2.00774	1.4905	2.00627
AT3G45750	2.11818	1.74028	1.71559	2.0083	1.4907	2.00657
AT3G53350	2.11893	1.7409	1.71596	2.00884	1.49147	2.00778
AT3G07320	2.1196	1.74212	1.7168	2.00962	1.49194	2.00861
AT1G09480	2.12011	1.74281	1.71742	2.01032	1.49249	2.00886
AT5G02640	2.12069	1.74397	1.7183	2.01105	1.49296	2.00971
AT3G17900	2.12145	1.74444	1.71895	2.01156	1.49315	2.01065
AT3G02390	2.12172	1.74503	1.71924	2.01186	1.494	2.01142
AT4G35930	2.12241	1.74539	1.71997	2.0121	1.49446	2.01207
AT5G18340	2.12306	1.74588	1.7209	2.01348	1.49483	2.01248
AT3G07400	2.12362	1.74635	1.7213	2.01453	1.49526	2.01309
AT3G53090	2.12394	1.74665	1.72189	2.01491	1.49625	2.01516
AT5G23155	2.12449	1.74739	1.72235	2.01549	1.49708	2.01635
AT4G00905	2.12581	1.74811	1.72316	2.01593	1.49748	2.01725
AT3G23870	2.12761	1.74871	1.724	2.01669	1.49812	2.01784
AT3G57470	2.12855	1.74908	1.72479	2.01717	1.49877	2.01853
AT5G58440	2.12884	1.74963	1.72506	2.01765	1.49923	2.01923
AT3G51915	2.13058	1.75002	1.72617	2.01817	1.50002	2.01972
AT1G77210	2.13102	1.75027	1.72681	2.01902	1.50093	2.02023
AT3G16650	2.13175	1.75128	1.72731	2.02073	1.50128	2.02094
AT5G02170	2.13267	1.75235	1.72741	2.02132	1.50195	2.02158
AT1G07810	2.1337	1.7527	1.72758	2.02164	1.50252	2.02233
AT4G04221	2.13396	1.75402	1.72833	2.02251	1.50321	2.0228
AT2G36090	2.1349	1.75513	1.72883	2.02293	1.50366	2.02357
AT2G05810	2.13543	1.75528	1.72925	2.0237	1.50391	2.02397
AT1G29300	2.13622	1.756	1.7301	2.02426	1.50411	2.02434
AT4G28080	2.13792	1.75713	1.73129	2.02474	1.50465	2.02481
AT2G24050	2.13845	1.75828	1.73165	2.02536	1.50527	2.0254
AT5G28530	2.13884	1.7587	1.73202	2.02615	1.50564	2.02592
AT2G33540	2.13948	1.75937	1.73273	2.02682	1.5065	2.02775
AT5G41180	2.13995	1.75989	1.73292	2.02766	1.50679	2.02782
AT1G76410	2.14057	1.76013	1.7335	2.02854	1.50722	2.02859
AT3G48360	2.14136	1.76045	1.73384	2.02956	1.50795	2.02911
AT3G60240	2.14232	1.76087	1.73432	2.03026	1.5085	2.02961
AT1G80170	2.14323	1.76211	1.73487	2.03158	1.50875	2.03078
AT4G27430	2.14367	1.76265	1.73523	2.03179	1.50913	2.03106
AT4G27360	2.1441	1.76318	1.73576	2.03237	1.5095	2.03228
AT3G05670	2.14469	1.76371	1.73603	2.03277	1.51017	2.03339
AT3G04810	2.14581	1.76477	1.73633	2.03297	1.51143	2.03474
AT5G45610	2.14638	1.76534	1.73715	2.0336	1.51208	2.03568
AT2G42350	2.14687	1.76595	1.73789	2.03466	1.51252	2.03611
AT4G21900	2.14736	1.76658	1.73821	2.03519	1.51333	2.03679
AT4G17490	2.14786	1.76803	1.73849	2.03558	1.51373	2.03876
AT3G54320	2.14853	1.76832	1.73876	2.03622	1.51391	2.03882
AT4G20190	2.14912	1.76852	1.73957	2.03654	1.51435	2.03941
AT3G50800	2.14983	1.76947	1.74	2.03829	1.51465	2.03995
AT5G63690	2.15029	1.77049	1.74081	2.03988	1.51577	2.04009
AT2G12550	2.15068	1.77091	1.74149	2.04035	1.51627	2.04033
AT5G52830	2.15108	1.77211	1.74201	2.04112	1.51682	2.04055
AT3G13700	2.1523	1.77294	1.74294	2.04223	1.51691	2.04072
AT3G62240	2.15318	1.77344	1.74334	2.04357	1.51718	2.04178
AT5G02460	2.15409	1.77437	1.74377	2.04434	1.51752	2.04223
AT3G48050	2.15452	1.77517	1.74415	2.04487	1.51774	2.0429
AT3G05680	2.15585	1.77544	1.74544	2.04625	1.51819	2.04356
AT3G04950	2.15694	1.77631	1.74592	2.04731	1.51877	2.04425
AT3G29670	2.15754	1.77694	1.74682	2.04801	1.51919	2.04523
AT1G30240	2.15803	1.77755	1.74816	2.04887	1.51963	2.04545
AT3G19780	2.15861	1.77805	1.74829	2.04998	1.52022	2.04568
AT3G47700	2.15937	1.77864	1.74897	2.05014	1.52039	2.04652
AT4G11370	2.15999	1.77927	1.74935	2.05044	1.52084	2.0474
AT1G29820	2.16094	1.77974	1.74991	2.05118	1.52112	2.04789
AT3G58930	2.16117	1.78016	1.75126	2.05244	1.52185	2.04816
AT1G48598	2.16206	1.78116	1.75156	2.0536	1.52268	2.04872
AT4G22530	2.16241	1.78182	1.75263	2.05439	1.52339	2.04901
AT5G27650	2.16326	1.78273	1.7532	2.05521	1.52446	2.04933
AT3G16130	2.16385	1.7834	1.75344	2.05569	1.52538	2.05022
AT2G43440	2.16434	1.78453	1.75438	2.05659	1.52565	2.05054
AT5G40920	2.16547	1.78521	1.75482	2.05748	1.52604	2.0511
AT2G42290	2.16624	1.78569	1.75554	2.05817	1.52619	2.05177
AT4G35500	2.16729	1.78612	1.75616	2.06007	1.5267	2.0534
AT1G50360	2.16758	1.78634	1.75648	2.06058	1.52692	2.05371
AT5G22760	2.16899	1.78657	1.75749	2.06119	1.5272	2.05453
AT2G20815	2.16937	1.78714	1.75798	2.06173	1.528	2.05524
AT3G11600	2.16997	1.78751	1.75876	2.06215	1.52847	2.05595
AT5G43130	2.17028	1.78799	1.75894	2.06282	1.5293	2.05621
AT1G24400	2.17104	1.78862	1.75952	2.06338	1.52984	2.05702
AT5G47960	2.17148	1.78879	1.76003	2.06372	1.53011	2.05742
AT5G40400	2.17289	1.7895	1.76049	2.06452	1.53104	2.05813
AT4G36290	2.17433	1.79005	1.761	2.06498	1.53166	2.05904
AT1G09750	2.17488	1.79064	1.76201	2.06589	1.53215	2.05958
AT3G58850	2.17566	1.7913	1.76234	2.06643	1.53241	2.05997
AT1G07119	2.17696	1.79179	1.76278	2.06685	1.53302	2.06042
AT3G58110	2.17778	1.79261	1.76371	2.06796	1.5336	2.06078
AT5G01830	2.17818	1.79356	1.76391	2.06863	1.53394	2.06178
AT5G13870	2.17839	1.7948	1.76421	2.06928	1.53464	2.06339
AT4G21310	2.17881	1.79577	1.76442	2.07035	1.53499	2.06392
AT2G28870	2.17938	1.79596	1.76548	2.07119	1.53559	2.06506
AT3G57140	2.1806	1.79675	1.76625	2.07157	1.53619	2.06533
AT3G13780	2.18081	1.79703	1.76663	2.07218	1.5366	2.06694
AT4G01910	2.18188	1.79759	1.76737	2.07262	1.53791	2.06783
AT3G53190	2.18281	1.79907	1.76824	2.07313	1.5382	2.06882
AT3G60390	2.18346	1.79937	1.76878	2.07346	1.53862	2.06975
AT4G22350	2.18436	1.80026	1.7699	2.07384	1.53895	2.07135
AT2G25170	2.18563	1.80082	1.77017	2.07435	1.53942	2.07352
AT4G37850	2.18644	1.80152	1.7707	2.07502	1.53998	2.07479
AT4G14830	2.18682	1.80176	1.77122	2.07543	1.54099	2.07578
AT3G22410	2.18771	1.80248	1.77198	2.07576	1.5418	2.07624
AT4G16280	2.18837	1.80346	1.77255	2.07658	1.54222	2.0776
AT1G11350	2.18892	1.80374	1.77266	2.07687	1.54258	2.07827
AT5G09630	2.18969	1.804	1.77336	2.0779	1.54297	2.07946
AT4G13505	2.19052	1.80436	1.77386	2.07934	1.54341	2.08036
AT4G26255	2.19097	1.80515	1.77458	2.07959	1.54348	2.0807
AT2G24520	2.19183	1.80551	1.77491	2.08022	1.54398	2.08103
AT4G16480	2.19204	1.80581	1.77521	2.08093	1.54438	2.0814
AT5G42360	2.19266	1.80705	1.77595	2.0816	1.545	2.08157
AT3G62510	2.19358	1.80774	1.77628	2.08276	1.5451	2.08208
AT2G38260	2.1939	1.80811	1.77649	2.08398	1.54533	2.08263
AT1G45180	2.19444	1.80845	1.77721	2.08492	1.54576	2.08333
AT3G48500	2.19548	1.80922	1.77782	2.0855	1.54642	2.08357
AT5G38780	2.1967	1.80967	1.77866	2.08638	1.5472	2.08434
AT2G39380	2.19789	1.81053	1.77959	2.08742	1.54799	2.0851
AT1G17170	2.1987	1.81086	1.78052	2.08762	1.5488	2.08562
AT1G27850	2.19945	1.81121	1.78113	2.08835	1.54916	2.08636
AT5G54520	2.20057	1.81167	1.78159	2.08898	1.5494	2.08796
AT1G80070	2.20208	1.8128	1.78178	2.09012	1.5502	2.08862
AT5G56880	2.20316	1.81351	1.78233	2.09094	1.55088	2.08883
AT5G58480	2.20443	1.81405	1.78284	2.09186	1.55168	2.08955
AT2G02150	2.2048	1.81438	1.78371	2.09241	1.55212	2.09013
AT3G56890	2.20549	1.81477	1.78437	2.09272	1.55268	2.09136
AT4G24200	2.20615	1.81561	1.78531	2.0932	1.5532	2.09217
AT2G15680	2.20711	1.816	1.78611	2.09377	1.55349	2.09289
AT2G16380	2.20753	1.81717	1.78712	2.09509	1.55381	2.09392
AT3G18510	2.20918	1.81764	1.78746	2.09574	1.55411	2.0946
AT1G12420	2.21024	1.81794	1.78804	2.09687	1.5551	2.09503
AT5G45475	2.21105	1.81886	1.78843	2.09815	1.55566	2.0961
AT2G18260	2.21154	1.8193	1.78939	2.09866	1.55594	2.09729
AT5G49560	2.21293	1.82037	1.7907	2.09911	1.55658	2.09757
AT5G27750	2.21338	1.82191	1.79081	2.10012	1.55703	2.09793
AT4G14920	2.21449	1.8222	1.79161	2.10073	1.55808	2.09867
AT5G50330	2.21487	1.82291	1.79278	2.10132	1.55832	2.09931
AT5G37550	2.21517	1.82366	1.79328	2.10206	1.55873	2.1001
AT5G28442	2.21628	1.82548	1.79361	2.10312	1.55951	2.10045
AT2G43310	2.21708	1.82606	1.79418	2.1036	1.56024	2.10087
AT1G61170	2.21752	1.82704	1.7946	2.10451	1.56083	2.10098
AT5G13480	2.21802	1.82736	1.79544	2.10499	1.56112	2.10117
AT2G48160	2.21864	1.82776	1.79581	2.10621	1.56175	2.10187
AT4G29730	2.21945	1.82822	1.79651	2.1072	1.56214	2.10218
AT3G23790	2.22036	1.82858	1.79782	2.10822	1.56256	2.10308
AT2G29720	2.22134	1.82903	1.79808	2.10894	1.56277	2.10349
AT5G60870	2.22221	1.82937	1.79839	2.1095	1.56334	2.10398
AT3G27970	2.22259	1.82995	1.79937	2.11037	1.56356	2.10435
AT3G22380	2.22349	1.8308	1.79965	2.11126	1.56468	2.10521
AT1G17590	2.22458	1.83135	1.8001	2.11142	1.56594	2.10582
AT4G18425	2.22547	1.83221	1.80074	2.11294	1.56637	2.10664
AT2G20550	2.22604	1.83264	1.80174	2.11418	1.56708	2.10762
AT2G45930	2.22693	1.83305	1.80207	2.11456	1.56772	2.1084
AT2G42700	2.22792	1.83351	1.8034	2.1151	1.56793	2.10905
AT1G53540	2.22837	1.83449	1.80428	2.11529	1.56816	2.10969
AT1G13740	2.22866	1.83516	1.80595	2.11608	1.56883	2.11041
AT4G25730	2.22919	1.83567	1.80671	2.11704	1.56937	2.11177
AT3G10690	2.2301	1.83584	1.80715	2.11757	1.56982	2.11276
AT2G28660	2.23051	1.83625	1.80759	2.11827	1.57029	2.11545
AT3G22430	2.23129	1.83675	1.80878	2.11896	1.5708	2.11566
AT1G78050	2.23196	1.83753	1.80977	2.1199	1.57142	2.11675
AT4G05040	2.23269	1.83851	1.81022	2.12103	1.57184	2.11719
AT2G01660	2.23376	1.83912	1.81063	2.12187	1.57264	2.11762
AT2G46890	2.23442	1.83955	1.81124	2.12304	1.57295	2.11831
AT1G21700	2.2346	1.83985	1.81187	2.12366	1.57328	2.11891
AT3G53690	2.23574	1.84053	1.8127	2.12437	1.5738	2.12037
AT5G08470	2.23669	1.84133	1.81297	2.12601	1.57434	2.12123
AT5G09580	2.23721	1.84185	1.81379	2.1264	1.57477	2.12211
AT3G62200	2.23781	1.84204	1.81427	2.1268	1.57553	2.12271
AT2G17880	2.23859	1.84292	1.81525	2.12728	1.57622	2.12503
AT1G73400	2.23989	1.84396	1.8156	2.12813	1.57683	2.12677
AT5G07970	2.24032	1.84482	1.81681	2.12912	1.57715	2.12753
AT3G11240	2.24151	1.84548	1.81723	2.12983	1.57752	2.12826
AT4G26795	2.24246	1.84587	1.8179	2.13037	1.57849	2.12921
AT1G17110	2.24334	1.84649	1.8187	2.13176	1.57892	2.13022
AT1G36160	2.24376	1.84715	1.81968	2.13235	1.57907	2.13066
AT3G04340	2.24498	1.84729	1.82121	2.133	1.57974	2.13153
AT3G56408	2.24643	1.84755	1.82193	2.13351	1.58022	2.13231
AT4G37970	2.24715	1.84816	1.82283	2.13407	1.58106	2.13267
AT5G64905	2.24808	1.84884	1.82306	2.13503	1.58161	2.13326
AT5G18360	2.24941	1.84973	1.82346	2.13556	1.58217	2.13462
AT1G31870	2.25067	1.8503	1.82428	2.13672	1.58322	2.13511
AT2G19670	2.25168	1.85119	1.82514	2.13779	1.58344	2.136
AT2G33815	2.25253	1.85139	1.82569	2.13892	1.58389	2.13633
AT1G11960	2.25301	1.85222	1.82651	2.14013	1.58462	2.13661
AT1G51890	2.25333	1.85319	1.82678	2.14036	1.58527	2.13774
AT5G22520	2.254	1.8542	1.82732	2.14098	1.58605	2.13854
AT5G47750	2.25416	1.85476	1.82766	2.14255	1.58644	2.13877
AT1G26620	2.25491	1.85508	1.82841	2.14397	1.58703	2.13906
AT2G38570	2.25573	1.85582	1.8292	2.14433	1.58746	2.13954
AT1G63420	2.2565	1.85637	1.82956	2.14549	1.58781	2.14046
AT5G43620	2.25737	1.85682	1.83016	2.14605	1.58851	2.14106
AT2G15890	2.25902	1.85733	1.83028	2.147	1.5894	2.1433
AT1G18265	2.25976	1.85793	1.83074	2.14738	1.59079	2.14383
AT1G20840	2.26036	1.85889	1.8314	2.14769	1.59118	2.14432
AT1G65480	2.26119	1.85943	1.83257	2.1483	1.59211	2.14552
AT5G45840	2.26238	1.85995	1.83294	2.14911	1.59249	2.14575
AT5G17930	2.26266	1.86045	1.83338	2.15003	1.59296	2.14605
AT5G09930	2.26316	1.86093	1.83443	2.15072	1.59332	2.14627
AT2G29410	2.26371	1.86158	1.83509	2.15169	1.59373	2.1471
AT1G18870	2.26419	1.86228	1.83563	2.15233	1.59401	2.14785
AT3G56480	2.26564	1.86328	1.83689	2.15255	1.59448	2.14811
ATMG00020	2.26595	1.86382	1.83771	2.15311	1.59501	2.14898
AT4G35430	2.26663	1.86479	1.8382	2.15368	1.59556	2.14945
AT5G62580	2.26721	1.86566	1.83895	2.15434	1.59629	2.15078
AT4G21440	2.26798	1.8666	1.83996	2.15489	1.5968	2.152
AT2G16920	2.26837	1.86672	1.84093	2.15526	1.59737	2.15204
AT1G06475	2.26927	1.86737	1.84117	2.15595	1.59794	2.15294
AT4G11670	2.27038	1.86805	1.84148	2.15666	1.59867	2.15343
AT4G32890	2.27072	1.86885	1.84187	2.15739	1.59912	2.15407
AT3G05660	2.27116	1.86943	1.84242	2.15762	1.59992	2.15511
AT3G08000	2.27201	1.86987	1.8431	2.15919	1.6005	2.15624
AT5G06810	2.2724	1.87069	1.84405	2.15975	1.60124	2.15654
AT5G18440	2.27302	1.87155	1.84489	2.16019	1.60136	2.15749
AT3G13560	2.27424	1.87201	1.84568	2.16075	1.60224	2.15853
AT4G38300	2.27501	1.87261	1.84595	2.16154	1.60299	2.15903
AT3G59430	2.27553	1.87329	1.84679	2.16225	1.60352	2.16115
AT2G32030	2.27625	1.87391	1.84811	2.16293	1.60364	2.16164
AT1G70740	2.27819	1.87445	1.84835	2.16361	1.60399	2.16238
AT3G59330	2.27859	1.87462	1.8485	2.16414	1.60425	2.16304
AT5G40540	2.27959	1.87505	1.84874	2.16563	1.60453	2.16384
AT5G46280	2.28049	1.87582	1.84909	2.16582	1.60503	2.16542
AT3G22070	2.28189	1.87661	1.84957	2.16681	1.60534	2.1659
AT2G19990	2.28335	1.87739	1.85026	2.16738	1.60574	2.16661
AT5G17580	2.28439	1.87789	1.85062	2.1678	1.60632	2.16735
AT5G57070	2.2848	1.8786	1.85124	2.16827	1.6072	2.16772
AT3G50340	2.28504	1.87923	1.85207	2.16908	1.6077	2.16921
AT2G16640	2.2861	1.87959	1.85232	2.16999	1.60828	2.16955
AT1G49430	2.28633	1.87967	1.8536	2.17044	1.60853	2.16985
AT1G25390	2.28725	1.88006	1.85584	2.17084	1.60949	2.1711
AT5G06300	2.28757	1.88063	1.85715	2.17175	1.61107	2.17224
AT5G44306	2.28787	1.88191	1.85806	2.17227	1.61146	2.17255
AT2G32410	2.28895	1.88229	1.85824	2.17272	1.61169	2.1736
AT2G22650	2.28977	1.88314	1.85893	2.17329	1.6124	2.17434
AT5G55570	2.29109	1.88377	1.85941	2.17393	1.61249	2.1746
AT3G09650	2.29133	1.88431	1.86035	2.17429	1.6129	2.17515
AT2G38460	2.29212	1.88526	1.861	2.1752	1.61367	2.17555
AT3G50590	2.29254	1.88618	1.86214	2.17565	1.61438	2.17635
AT1G03960	2.29265	1.88689	1.86315	2.17605	1.61486	2.17657
AT5G27970	2.29344	1.88758	1.86388	2.17689	1.61522	2.1778
AT5G56780	2.29365	1.88811	1.86422	2.17739	1.61589	2.1791
AT3G19360	2.29429	1.88849	1.8652	2.17786	1.61646	2.18052
AT1G19835	2.29553	1.88924	1.86592	2.179	1.61708	2.18097
AT1G71020	2.29653	1.88979	1.86698	2.1798	1.61762	2.18135
AT3G52900	2.29758	1.88992	1.86727	2.18077	1.61827	2.18154
AT5G08270	2.29932	1.89024	1.86755	2.18106	1.61885	2.18223
AT5G17270	2.30022	1.89098	1.86797	2.18129	1.61951	2.18317
AT5G65120	2.30085	1.89136	1.86891	2.18158	1.61989	2.18346
AT5G10330	2.30252	1.89155	1.86991	2.18233	1.6201	2.18451
AT5G65560	2.30393	1.89193	1.87042	2.18331	1.62054	2.18533
AT2G18010	2.30518	1.89219	1.87122	2.18404	1.62081	2.18593
AT2G21100	2.30606	1.89241	1.87202	2.18527	1.62135	2.18722
AT5G61380	2.30652	1.89277	1.87228	2.18573	1.62191	2.1884
AT4G15810	2.30693	1.89352	1.87265	2.18672	1.62234	2.18903
AT3G63200	2.30751	1.8945	1.87307	2.18767	1.62315	2.18932
AT3G63290	2.30941	1.89568	1.8735	2.18813	1.62372	2.18986
AT4G28320	2.31008	1.89641	1.87394	2.18846	1.624	2.19229
AT1G67530	2.31067	1.89769	1.87443	2.18884	1.62536	2.19271
[truncated: 15,155 more rows]

## Sheet: B
GeneID	F_N_GFP	M_N_GFP	F_N_SAP54	M_N_SAP54	SAP_GFP_N	SAP_GFP_F	SAP_GFP_M			List of leaf-expressed genes and their log2(fold-change) in insect exposed 35S:GFP-SAP54 plants compared to insect exposed as well as insect-free 35S:GFP plants
AT3G48550	-1.68547	-0.705203	-1.54576	-0.225527	0.152961	0.292667	0.632637
AT1G16640	-0.159871	0.0989742	0.00155709	0.88339	-0.270087	-0.108659	0.514329
AT4G01680	-0.460242	0.546872	-1.07544	0.781638	0.516012	-0.0991828	0.750778
AT3G25250	2.99078	2.14348	1.81984	0.852889	0.339168	-0.831772	-0.951424
AT1G50910	-0.176298	-0.151965	-0.595285	-1.13796	0.398857	-0.0201303	-0.587138
AT5G03700	0.0832695	0.2004	-0.0904972	0.128632	0.37649	0.202723	0.304722			F_N_GFP	females on 35S:GFP plants vs no-insect 35S:GFP plants
AT2G45100	-0.896217	-0.615424	-0.801503	-0.962513	0.217909	0.312623	-0.129179			F_N_SAP	females on 35S:GFP-SAP54 plants vs no-insect 35S:GFP-SAP54 plants
AT5G45140	0.0254526	-0.761508	-0.732317	-1.7049	0.796917	0.0391472	-0.146478			M_N_GFP	males on 35S:GFP plants vs no-insect 35S:GFP plants
AT1G30720	1.47633	0.737145	0.779583	0.324799	0.739823	0.0430774	0.327477			M_N_SAP	males on 35S:GFP-SAP54 plants vs no-insect 35S:GFP-SAP54 plants
AT2G05160	-0.496523	-0.541987	-0.217058	-0.683001	-0.0625162	0.216948	-0.20353			SAP_GFP_N	no insect 35S:GFP-SAP54 plants vs no-insect 35S:GFP plants
AT2G28590	-0.239226	0.057388	-0.266648	0.254962	-0.0465101	-0.073932	0.151064			SAP_GFP_F	female 35S:GFP-SAP54 plants vs female 35S:GFP plants
AT5G67470	0.654833	0.242469	0.0251446	-0.922786	0.434045	-0.195643	-0.73121			SAP_GFP_M	male 35S:GFP-SAP54 plants vs male 35S:GFP plants
AT1G01760	0.0248596	-0.14951	-0.207954	-0.587022	0.350087	0.117273	-0.0874251
AT2G34140	2.58938	2.29289	0.263231	1.36702	0.756966	-1.56918	-0.168906
AT3G48150	-0.593403	-0.48228	-0.624258	-0.847036	0.0258805	-0.00497435	-0.338875
AT1G61280	-0.109627	0.386228	-0.631848	-0.130847	0.400147	-0.122074	-0.116928
AT5G61160	2.5589	1.93543	2.21981	1.95486	0.389777	0.0506886	0.409207
AT5G05680	0.139792	-0.578455	-0.55837	-1.57508	0.508917	-0.189245	-0.48771
AT5G28262	0.250393	0.0213121	0.0239672	0.292887	0.284528	0.0581031	0.556104
AT1G68725	0.761083	0.36879	0.185561	0.612057	-0.213925	-0.789448	0.029341
AT5G10260	-0.569748	0.0656067	-0.441844	0.596205	0.204898	0.332801	0.735497
AT2G05950	0.773524	0.0236001	-0.745849	0.266686	0.551708	-0.967665	0.794794
AT3G01750	0.724319	-0.171817	0.00322625	-1.28081	0.402123	-0.318969	-0.706871
AT1G52990	-0.502892	-0.417782	0.020157	0.429271	-0.381246	0.141802	0.465807
AT3G47890	0.550136	-0.332766	-0.689713	-2.065	1.04278	-0.197067	-0.689449
AT2G45685	1.77283	2.09028	-0.0466651	-0.348517	1.18787	-0.631623	-1.25093
AT3G60220	-0.920672	-0.00763697	-0.833748	0.145777	-0.153699	-0.0667755	-0.000285304
AT5G50090	-0.837236	-0.656388	-0.29586	-0.180835	0.148195	0.68957	0.623748
AT5G11020	-0.610686	-0.304958	-0.7279	-0.285868	0.224051	0.106837	0.243141
AT5G42040	-0.508204	-0.216175	-0.455152	0.122825	-0.125675	-0.0726219	0.213326
AT4G36030	0.379043	-0.357307	-0.0618294	-0.997031	0.22155	-0.219322	-0.418173
AT2G40711	-0.0197734	0.116472	0.00100723	0.14388	0.101012	0.121792	0.128419
AT3G20490	0.868912	0.310851	0.0106157	-0.464128	0.173562	-0.684734	-0.601417
AT5G47800	-0.284061	-0.547827	-0.421754	-1.26175	-0.201421	-0.339114	-0.915346
AT3G28925	1.77959	1.34658	2.04076	2.20832	-0.98698	-0.725809	-0.125236
AT1G15480	0.0836049	-0.304064	-0.628449	-1.61691	0.567365	-0.144688	-0.745483
AT5G13830	-0.404932	-0.391525	-0.786123	0.0189559	0.0765419	-0.304649	0.487023
AT3G09375	0.191385	-0.111732	-0.176208	-0.445151	0.0945866	-0.273006	-0.238833
AT1G70020	0.168981	0.233834	0.239728	0.83734	0.118579	0.189326	0.722085
AT5G09976	0.47645	0.471151	0.10256	0.227848	0.109184	-0.264705	-0.134119
AT5G23000	3.28231	0.657698	6.66408	4.79225	-3.37467	0.00710606	0.759882
AT1G58250	0.335968	-0.487755	-0.624968	-1.85667	0.924037	-0.036899	-0.444876
AT1G09680	0.430855	0.011641	0.538164	0.17147	0.0196244	0.126933	0.179453
AT3G07210	0.234314	-0.605245	-0.408051	-1.16432	0.282876	-0.35949	-0.276196
AT5G63550	-0.329216	-0.823106	-0.741207	-1.49567	0.496866	0.0848752	-0.175701
AT4G38560	2.47696	1.94087	1.30682	-0.136787	0.787481	-0.382657	-1.29018
AT1G78090	-1.2013	-0.349823	-0.932629	-0.00810016	0.0665853	0.335258	0.408308
AT1G02050	0.127972	-0.336238	-0.783787	-1.39819	0.573224	-0.338535	-0.488729
AT4G31890	-0.56032	-0.356083	-0.455108	-1.02218	0.293393	0.398605	-0.3727
AT2G25460	2.73901	2.1503	2.55709	1.48891	-0.162759	-0.34467	-0.824151
AT1G61500	0.0321736	-0.353798	-0.327132	-0.972698	0.3922	0.032895	-0.2267
AT3G10070	0.133842	-0.0244291	-0.39186	-1.3142	0.38602	-0.139682	-0.903752
AT3G07980	0.437474	-0.288368	-0.226901	-1.50933	0.446855	-0.21752	-0.774103
AT1G19950	-0.639106	-0.644228	-0.777079	-1.41343	0.552414	0.414442	-0.216793
AT3G54930	-0.651651	-0.653732	-0.0703394	-0.29276	-0.327939	0.253372	0.0330327
AT3G54180	0.195657	0.73674	0.574799	1.26699	-0.419238	-0.0400969	0.111007
AT5G59680	0.938863	0.499134	0.356634	-1.20267	0.993371	0.411141	-0.708432
AT5G65180	0.267999	-0.232812	-0.728844	-1.43267	0.742887	-0.253956	-0.456966
AT4G20910	0.0520257	-0.48298	-0.564055	-1.74595	0.508276	-0.107805	-0.754692
AT1G17850	-0.68459	-1.09118	-1.25878	-1.61467	0.339717	-0.234475	-0.183774
AT2G36307	0.219275	0.74239	0.470084	0.483784	0.431733	0.682542	0.173127
AT3G20340	1.90802	1.85503	0.838206	1.18093	0.661056	-0.408759	-0.0130458
AT1G61690	0.655543	-0.447306	-0.253148	-2.28577	0.80095	-0.10774	-1.03751
AT1G17560	-0.555832	-0.290481	-0.933208	-0.0145251	0.323049	-0.0543261	0.599005
AT2G41830	0.385051	-0.267852	-0.530274	-1.09714	0.589994	-0.325331	-0.239294
AT5G02400	0.186579	-0.564617	-0.577724	-0.845378	0.262454	-0.501849	-0.018306
AT1G11520	0.530711	0.0306464	-0.383262	-1.02183	0.704395	-0.209578	-0.348077
AT1G61260	0.0406257	0.450692	-0.188276	0.0249756	0.193862	-0.0350399	-0.231855
AT1G17580	0.173413	-0.767613	-0.76265	-2.53726	1.0698	0.133742	-0.699838
AT4G30570	0.164728	-0.044526	-0.52102	-0.529283	0.650614	-0.0351346	0.165857
AT5G02440	-0.766075	-0.493244	-0.502087	0.097543	0.0625476	0.326536	0.653335
AT1G14480	1.05079	0.24795	0.0365618	0.0492907	0.162851	-0.851377	-0.0358084
AT4G03376	-1.80715	-0.583274	21.1836	21.8973	-22.8337	1.16307	0.652937
AT5G03450	0.272375	-0.268266	-0.727577	-1.26009	0.592062	-0.40789	-0.399758
AT1G01225	-0.674996	-0.188433	-0.32253	0.18241	-0.24968	0.102786	0.121163
AT3G16980	0.592819	0.76072	0.287727	0.243191	0.469087	0.163995	-0.0484422
AT1G19340	-0.627462	-0.618348	-0.521878	-0.60464	0.148696	0.25428	0.162404
AT1G12890	1.12296	0.280868	0.985934	0.902334	-0.561226	-0.698257	0.0602401
AT1G03270	-0.436754	-0.355317	-0.631762	-0.891387	-0.0581117	-0.253119	-0.594181
AT3G60961	3.06473	2.86118	2.35985	2.32379	0.459532	-0.24535	-0.0778497
AT2G28670	0.342175	0.348568	-0.206134	-0.205543	0.198203	-0.350106	-0.355907
AT1G13940	0.320132	-0.654805	-0.357172	-2.23454	0.784377	0.107072	-0.795356
AT3G49730	-0.135295	-0.446424	-0.717274	-1.07983	0.515089	-0.0668896	-0.118318
AT1G05670	-0.0619784	-0.294386	-0.535013	-0.722626	0.353953	-0.119082	-0.0742866
AT5G23430	0.045167	-0.359488	-0.497632	-1.07733	0.354908	-0.187891	-0.362929
AT1G19025	-0.221755	-0.588585	-0.340989	-0.464123	0.240984	0.12175	0.365447
AT2G16750	-0.826315	-0.0529092	-0.470172	0.518851	0.118255	0.474399	0.690015
AT1G63295	-0.0172215	-0.377596	-0.405588	-0.0588197	0.00515983	-0.383206	0.323936
AT3G55090	-0.278695	-0.278739	-0.0138567	0.0921665	-0.59103	-0.326191	-0.220124
AT5G43840	-0.504098	0.235426	1.07686	1.96813	-1.33842	0.24254	0.394285
AT2G23620	0.607554	1.01611	0.790439	1.51547	-0.120207	0.0626788	0.379152
AT2G34780	0.182253	-0.42462	-0.625757	-1.50422	0.627548	-0.180462	-0.452054
AT5G08391	0.767593	-0.296285	0.201889	0.830788	0.273762	-0.291942	1.40083
AT2G29580	0.259964	-0.466852	-0.576322	-1.90277	0.64349	-0.192797	-0.792428
AT2G25500	0.231914	0.277327	-0.178046	0.923012	0.198652	-0.211308	0.844336
AT3G17220	1.15515	0.719451	-0.036825	-0.133687	0.721301	-0.470671	-0.131838
AT1G05800	22.1151	19.9558	3.57826	4.00918	15.9492	-2.58774	-1.00351
AT2G24870	1.01354	0.46287	0.241405	-0.0717172	0.562994	-0.209145	0.0284068
AT5G49665	-0.246836	-0.452948	-0.263626	-1.62806	0.544413	0.527623	-0.630701
AT3G14120	-0.00148266	-0.268147	-0.636778	-1.78568	0.583771	-0.0515244	-0.933763
AT3G11570	2.19837	1.55899	1.11566	0.722856	0.428304	-0.654413	-0.407829
AT5G23770	0.195939	-0.146964	-0.189797	-0.589174	0.524342	0.138606	0.0821326
AT3G48810	-0.223733	-0.260432	-0.419608	-0.586812	0.0892276	-0.106647	-0.237151
AT3G61185	3.21997	-0.10757	0	0	-19.1524	-22.3724	-19.0448
AT1G62835	-1.00713	-0.450998	-0.831311	0.248836	-0.353597	-0.177779	0.346237
AT1G70560	-0.157822	-0.0831851	0.103213	-0.515798	-0.154246	0.106789	-0.586859
AT4G36060	1.33334	0.747227	1.93432	1.8839	-1.81654	-1.21556	-0.67987
AT4G21926	-0.201938	-0.0496977	-0.451606	-0.0621197	0.137695	-0.111973	0.125273
AT5G54850	-0.343041	-0.148293	0.106659	0.20517	-0.0471714	0.402528	0.306292
AT1G12775	-0.018893	-0.121562	-0.266091	-0.464339	0.019543	-0.227655	-0.323234
AT5G25090	0.59066	0.670269	1.64199	1.80605	-0.807129	0.244202	0.32865
AT1G25540	0.668824	-0.318994	-0.352852	-1.69393	0.675142	-0.346533	-0.699798
AT5G25830	-0.0456874	0.115004	-0.0808387	-0.00913967	0.251166	0.216015	0.127022
AT3G06830	0.264236	0.0181354	0.0471126	-0.294835	-0.0340475	-0.251171	-0.347017
AT3G51910	-0.859146	0.0338319	-0.83763	-0.0157392	0.355232	0.376748	0.305661
AT1G64760	0.434811	0.398391	0.192301	0.0555421	0.197244	-0.0452662	-0.145606
AT5G44040	-0.500446	-0.445012	-0.666537	-0.950032	0.704907	0.538817	0.199888
AT1G27460	-0.605256	-0.7559	-1.07359	-1.17334	0.350751	-0.117587	-0.0666842
AT1G11570	0.287327	-0.296351	0.92142	1.59149	-1.18886	-0.554766	0.698981
AT5G18930	-0.700777	-0.487115	-0.312166	-1.11485	0.0456789	0.43429	-0.582053
AT2G41960	0.558065	-0.471142	-0.669424	-2.37894	1.01778	-0.209712	-0.890022
AT1G69950	0.063619	-0.543324	-0.79085	-1.87888	0.720126	-0.134343	-0.615426
AT5G55470	-0.629135	-0.288613	-0.430101	-0.312708	-0.086574	0.11246	-0.110669
AT1G06590	0.153723	-0.14879	-0.322029	-0.715743	0.349908	-0.125844	-0.217045
AT5G37410	-0.0976826	-0.140623	-0.0843385	-0.488691	0.338434	0.351778	-0.00963391
AT1G06580	-0.11073	-0.172643	-0.10564	-0.0098849	0.178082	0.183171	0.34084
AT2G36355	0.347007	-0.351867	0.536532	0.425536	0.0602116	0.249736	0.837614
AT5G07620	-0.118262	0.509229	-0.0860061	-0.0313871	0.25751	0.289766	-0.283106
AT2G19250	0.373458	0.0600754	-0.137438	-0.36225	0.368862	-0.142033	-0.0534633
AT3G48390	0.151541	-0.245695	0.0810474	-0.76016	0.392082	0.321588	-0.122383
AT1G72200	-0.371295	-0.4785	-0.377275	-0.0702811	0.117445	0.111465	0.525664
AT3G59290	0.597649	-0.10446	-0.396207	-1.92832	0.768166	-0.225691	-1.0557
AT5G24920	0.0230151	0.65319	0.472509	0.746585	0.510707	0.960201	0.604102
AT4G17330	0.0859976	-0.631135	-0.64415	-1.9891	0.805451	0.0753033	-0.55251
AT5G45330	-0.351729	-0.794573	-0.728864	-1.02488	0.0883406	-0.288795	-0.141969
AT1G63860	1.01884	0.628449	0.367572	-0.19647	0.673518	0.0222527	-0.1514
AT2G34500	4.10305	2.5849	1.91692	1.22261	0.711858	-1.47427	-0.650433
AT5G61200	-0.481347	-0.540416	-0.315273	-0.294922	0.466187	0.632262	0.711681
AT1G70885	-0.198001	-0.158814	-0.509316	-0.168472	-0.18427	-0.495585	-0.193928
AT3G49690	2.64986	1.95178	2.59017	1.80226	-0.0594118	-0.119111	-0.208928
AT5G64640	-0.276383	-0.439521	-0.394416	-0.902433	-0.0793019	-0.197335	-0.542213
AT1G53680	-1.10548	-0.778725	-0.69762	0.282819	-0.22042	0.187444	0.841125
AT1G10160	-0.00754025	-0.154652	-0.0955027	-0.376731	-0.0312885	-0.119251	-0.253368
AT5G04890	0.110639	0.120326	0.206969	-0.0779812	0.156229	0.252559	-0.0420777
AT4G12010	1.08807	0.0590365	0.089259	-0.965836	0.677681	-0.321131	-0.347191
AT4G21903	1.38194	1.30431	1.97813	1.83363	-0.931065	-0.334884	-0.401744
AT2G36970	-1.19872	-0.34374	-1.39919	-0.459978	-0.122896	-0.323367	-0.239134
AT4G17240	-0.463883	-0.125894	-0.242895	-0.11461	-0.058807	0.162181	-0.0475235
AT4G22280	-0.580627	-0.310076	-0.0025963	0.671616	-0.485573	0.0924581	0.496119
AT1G76540	-0.129621	-0.36472	0.673956	-0.31814	-0.693934	0.109644	-0.647354
AT1G08300	0.407162	0.261716	-0.53093	-0.982328	0.586794	-0.351298	-0.657249
AT3G59690	0.333382	-0.502602	-0.322734	-1.51746	0.409315	-0.246802	-0.605543
AT1G61970	0.0542162	-0.344814	-0.550751	-0.586494	0.505291	-0.0996763	0.263611
AT4G13330	-0.0138005	0.0136447	-0.555065	0.0355223	0.485286	-0.055978	0.507164
AT1G60505	0.0383656	-0.355467	-0.582944	-1.14255	0.142191	-0.479119	-0.644896
AT4G39600	-0.209601	-0.218461	-0.411886	-0.635264	0.159243	-0.0430422	-0.25756
AT3G60310	0.043063	-0.515415	-0.660659	-1.0895	0.561177	-0.142545	-0.0129115
AT3G02500	-0.512191	-0.153985	-0.312048	0.758181	-0.328636	-0.128493	0.58353
AT2G07799	-0.043824	-0.149861	-0.0302947	0.74688	-2.23279	-2.21926	-1.33605
AT4G19865	-0.318125	-0.379482	-0.511213	-1.41082	0.419891	0.226802	-0.611447
AT3G53860	0.236691	-0.270248	-0.21895	-0.941919	0.370472	-0.0851699	-0.301199
AT1G10450	0.227019	-0.612172	-0.72837	-1.87992	0.901503	-0.0538857	-0.36625
AT1G74180	-0.0424988	-0.632063	-0.410979	-0.859341	0.33694	-0.0315396	0.109662
AT3G48410	-0.427223	-0.469729	-0.892498	-0.797957	-0.03628	-0.501555	-0.364508
AT5G24970	-0.0966784	-0.489849	-0.335593	-1.26885	0.182964	-0.0559505	-0.596039
AT1G73602	-0.960035	-0.469686	-1.15579	-1.58455	0.0174328	-0.178319	-1.09743
AT1G75190	-0.300685	0.0982413	-0.104414	0.546422	0.548785	0.745056	0.996966
AT2G13130	0.051295	-0.0927029	-0.158687	-0.272746	0.402179	0.192197	0.222136
AT1G16710	0.356088	-0.39772	-0.386571	-1.83314	0.770766	0.0281073	-0.664655
AT3G57350	-0.348188	-0.767218	-0.939218	-1.50429	0.340417	-0.250614	-0.396657
AT1G79950	0.484155	-0.40178	-0.490774	-1.56215	0.751045	-0.223884	-0.409325
AT2G35110	0.428372	-0.425595	-0.402607	-2.06613	0.82136	-0.00961864	-0.819176
AT5G62520	3.04145	1.88106	3.37485	2.65151	-0.766559	-0.433157	0.00389284
AT5G51670	-0.800344	0.449763	-0.511197	0.278122	-0.0749939	0.214153	-0.246635
AT1G79150	0.389124	-0.364826	-0.73187	-1.56911	0.751211	-0.369782	-0.453078
AT4G03811	-0.574787	-0.349562	-0.840586	0.623501	-0.178858	-0.444657	0.794205
AT1G20930	0.184067	0.135117	0.518959	0.447176	-0.366569	-0.0316777	-0.0545104
AT1G33800	0.425094	0.0880259	0.499104	0.283546	-0.191058	-0.117047	0.00446252
AT4G01740	0.981217	0.629762	0.478214	0.367912	0.64015	0.137147	0.3783
AT4G13660	3.90384	2.33296	4.94197	3.82863	-2.19259	-1.15445	-0.696919
AT3G25980	0.0755761	0.552431	0.904645	1.15149	-0.245613	0.583455	0.35345
AT1G23230	0.390511	-0.310612	-0.479542	-2.24945	0.766618	-0.103436	-1.17222
AT1G06150	9.55296e-05	-0.112877	-0.100451	-0.386715	-0.0178656	-0.118413	-0.291703
AT4G28700	-0.677511	-0.3765	-0.735794	-0.287761	-0.00598523	-0.0642682	0.0827539
AT2G44580	-0.256318	0.360377	0.450349	0.759581	-0.185555	0.521113	0.213649
AT1G43886	0.145264	0.146616	-0.119969	0.211448	0.130629	-0.134604	0.195461
AT5G64980	-0.47262	-0.118411	-0.460028	-0.175571	0.0548066	0.0673987	-0.00235278
AT5G12100	0.0112604	-0.488674	-0.606659	-1.58592	0.498505	-0.119415	-0.598745
AT2G37100	-1.44645	-0.480679	-0.781829	-0.404073	-0.0193884	0.645228	0.0572183
AT1G06265	0.747225	0.410048	-0.604431	-0.308622	0.922178	-0.429478	0.203508
AT1G37150	0.906569	0.388564	0.477133	1.18065	-0.298709	-0.728145	0.493376
AT4G20000	3.1969	2.22253	2.85327	2.84414	0.190322	-0.153305	0.811935
AT2G05914	-0.418464	1.70961	-0.498639	0.474679	-0.469422	-0.549597	-1.70435
AT1G68850	3.55033	1.78648	4.63349	2.87505	-2.07048	-0.98732	-0.981903
AT5G50315	0.271934	0.271953	0.679391	0.790928	0.165993	0.57345	0.684968
AT1G53887	-0.118097	0.447655	0.19907	1.12403	-0.608433	-0.291266	0.0679464
AT1G68350	1.49106	0.994321	1.66074	1.86485	-0.55426	-0.38458	0.316273
AT3G42725	1.29404	1.19483	1.80075	1.30706	-0.386637	0.120075	-0.274413
AT2G34340	0.535942	0.914772	-0.0422408	0.498362	0.92726	0.349077	0.51085
AT5G58520	-0.450404	-0.719791	-1.03768	-1.83377	0.656369	0.0690893	-0.457613
AT2G19950	0.855435	-0.346608	-0.611032	-1.70227	0.931143	-0.535324	-0.424522
AT1G72140	2.93432	2.29789	17.3555	14.3996	-19.678	-4.25086	-6.57028
AT2G16870	1.15305	0.553288	0.790556	-0.194946	0.548362	0.185866	-0.199872
AT2G05910	0.948956	0.623135	-0.448464	0.106692	0.687161	-0.710259	0.170718
AT3G12915	0.363673	-0.245815	-0.463278	-1.41756	0.423242	-0.403709	-0.748508
AT1G68470	0.85481	-0.0397157	0.385666	-0.858246	-0.23361	-0.702755	-1.05214
ATCG00340	-0.721757	-0.963354	-1.08482	-1.57839	0.384438	0.0213701	-0.230595
AT1G24265	-0.157848	0.0146142	-0.205437	0.0823645	-0.178613	-0.226202	-0.110863
AT1G23465	0.354015	-0.122646	0.42903	0.216241	0.121761	0.196775	0.460648
AT1G18620	-0.366574	-0.74776	-0.560151	-1.94795	0.656131	0.462555	-0.54406
AT1G11572	2.9178	2.24385	3.5897	3.21549	-0.549979	0.121922	0.421658
AT1G53520	-2.14633	-0.768973	-1.57099	0.706022	-0.360035	0.215304	1.11496
AT1G64600	-0.309985	-0.407898	-0.665894	-1.08253	0.413349	0.0574398	-0.261282
AT2G46180	0.8058	-0.268774	-0.48844	-1.79409	0.882268	-0.411972	-0.643047
AT2G17780	-0.368718	-0.27643	-0.110742	0.00436847	0.221857	0.479832	0.502655
AT4G14590	-0.177057	-0.409019	-0.0203854	-0.21103	0.326001	0.482672	0.52399
AT1G64270	0.0881032	-0.144272	-0.360722	-1.22771	0.457822	0.00899691	-0.625614
AT4G20350	-0.85582	-0.553558	-0.73343	0.185681	-0.185521	-0.0631315	0.553717
AT1G14850	-0.113308	-0.385007	-0.589053	-2.1463	0.607348	0.131603	-1.15395
AT5G42350	-0.096167	-0.0776663	-0.238482	-0.628305	0.242462	0.100147	-0.308176
AT5G05965	1.59839	1.52387	1.17141	0.61861	-0.0532879	-0.480265	-0.958544
AT1G45120	-0.142261	-0.514418	-0.0400651	-0.101899	0.404882	0.507078	0.817401
AT2G35630	0.168998	-0.460213	-0.687926	-2.32266	0.985661	0.128737	-0.87679
AT4G02100	-0.444332	0.00888595	-0.113746	0.101706	-0.101028	0.229558	-0.00820853
AT1G65900	-0.517998	-0.212431	-0.0250062	0.564838	-0.328654	0.164338	0.448615
AT4G20325	-0.528851	0.0553516	-0.0254578	0.685541	-0.10862	0.394773	0.52157
AT1G64960	-0.32487	-0.500803	-0.411575	-1.55217	0.444227	0.357522	-0.60714
AT4G02320	5.08968	3.59691	4.10895	2.26791	-0.0987318	-1.07946	-1.42773
AT2G30500	-0.229327	-0.60315	-0.504661	-1.90072	0.391674	0.116339	-0.905893
AT5G18525	0.676439	-0.0550682	-0.421068	-1.28166	0.656553	-0.440954	-0.570037
AT3G48430	0.188974	-0.616425	-0.468447	-1.97723	0.726238	0.0688166	-0.634564
AT5G52220	-0.522328	0.525293	0.391325	1.56639	-0.623481	0.290172	0.417615
AT5G16780	0.185093	-0.663356	-0.642023	-2.39427	0.977937	0.150821	-0.752976
AT5G43570	2.72688	-0.797685	21.3487	19.4897	-20.1331	-0.505189	1.16034
AT1G24577	-0.501948	-0.0442638	-0.0659961	1.07516	-0.285497	0.150455	0.83393
AT1G26380	3.4429	2.46176	3.69154	2.40716	-0.467602	-0.218962	-0.522207
AT3G53403	0.504336	-0.239294	0.485203	0.58178	0.34333	0.324197	1.1644
AT2G26220	-0.337896	0.14099	-0.648155	-0.244847	0.191461	-0.118797	-0.194375
AT5G51680	0.0560749	-0.40192	-0.441807	0.108027	-0.140374	-0.638256	0.369573
AT1G52270	-1.05107	0.170751	0.303979	0.925322	-0.261492	1.09356	0.49308
AT1G11190	0.0321422	-0.1279	-0.258783	-0.108298	0.083621	-0.207304	0.103222
AT3G24929	-0.287867	-0.0359843	-0.288496	-0.277409	0.688536	0.687907	0.447111
AT3G52310	0.527357	0.0456179	-0.0423567	-0.431329	0.250275	-0.319439	-0.226673
AT5G61140	0.510677	-0.385156	-0.4504	-1.45197	0.815378	-0.145699	-0.251436
AT4G32620	0.521357	-0.525853	-0.577632	-2.01827	0.937486	-0.161503	-0.554929
AT1G09800	-0.207591	-0.544788	-0.514594	-0.951139	-0.0696825	-0.376685	-0.476033
AT3G52605	-0.481823	0.116259	-0.534464	-0.268605	-0.289767	-0.342409	-0.674631
AT5G41080	2.78439	2.52602	1.78072	0.871446	1.30871	0.305044	-0.345865
AT5G51580	0.371934	0.852619	-0.0229293	0.663292	0.0745122	-0.320351	-0.114815
AT5G44910	0.118415	-0.215903	-0.295001	-0.840296	0.64362	0.230204	0.0192273
AT1G74750	0.52335	-0.0874412	-0.140628	-1.29503	0.283163	-0.380815	-0.924428
AT1G62860	-0.136121	-0.312105	-0.356976	-0.67914	0.503677	0.282822	0.136641
AT3G06433	-0.271432	0.267678	0.254819	0.848038	-0.28327	0.242981	0.297091
AT4G21880	-0.555675	-0.835654	-0.578651	-1.23852	0.640859	0.617883	0.237996
AT5G04240	0.31135	-0.457949	-0.513458	-1.86212	0.886716	0.0619071	-0.51746
AT3G01320	0.634317	-0.289941	-0.560472	-1.81242	1.06518	-0.129608	-0.457301
AT5G66350	0.414729	0.546334	0.279439	0.0342769	0.0637408	-0.0715498	-0.448316
AT2G29125	-1.22921	-0.435112	-0.399148	0.255451	-0.331003	0.499056	0.35956
AT1G09575	-0.410005	0.451064	-0.433824	0.408546	0.61783	0.594012	0.575313
AT3G60860	0.488865	-0.173413	-0.149976	-1.51117	0.708981	0.0701403	-0.628774
AT1G14460	0.0681748	-0.493783	-0.710632	-1.94012	0.729983	-0.0488239	-0.716357
AT4G36150	1.31113	0.734631	0.855396	-0.397148	0.79031	0.334573	-0.341469
AT3G23260	0.203401	0.263338	-0.0401022	0.44491	0.00551054	-0.237993	0.187082
AT4G28070	-0.12333	-0.0975748	-0.277356	-0.485452	-0.225611	-0.379637	-0.613489
AT2G03850	5.17727	-15.6342	3.35747	-0.331675	0.244586	-1.57521	16.5531
AT1G25530	-0.307756	-0.722657	0.210541	0.0223854	-0.300216	0.21808	0.444826
AT5G56540	0.0918124	-0.122839	0.186178	0.772485	-0.419592	-0.325226	0.475732
AT1G22330	-0.941739	0.0131059	-0.732742	-0.0936389	0.518575	0.727572	0.411831
AT3G14700	0.46807	0.294308	0.722276	1.12363	-0.0592482	0.194958	0.77007
AT2G34440	0.0877267	-0.318043	-0.0279864	0.00729753	0.0468054	-0.0689078	0.372145
AT3G25905	-0.666609	0.188153	-0.318546	0.33227	-0.13842	0.209643	0.00569732
AT5G58300	-0.24684	-0.41098	-0.37973	-1.1771	0.116629	-0.0162616	-0.64949
AT2G21540	-0.744667	-0.685359	-1.19077	-1.17948	0.34515	-0.100955	-0.148966
AT1G07290	0.247551	-0.283345	-0.599854	-0.803522	-0.0261427	-0.873548	-0.54632
AT1G76170	-0.214957	-0.120865	-0.280842	-0.21251	0.326083	0.260197	0.234438
AT5G03377	0.331676	0.114887	-0.135101	-0.162575	0.225684	-0.241094	-0.0517783
AT1G24460	0.778844	-0.259607	-0.373076	-2.23397	1.07191	-0.0800142	-0.902456
AT5G20540	-0.205639	-0.149756	-0.384505	-0.779022	0.114262	-0.0646042	-0.515004
AT5G25010	0.275353	0.380768	0.779803	1.06755	-0.345606	0.158843	0.341177
AT4G25692	0.303398	0.61912	0.712162	0.9085	-0.144899	0.263865	0.144482
AT3G48630	1.83428	1.62711	2.19574	2.70041	-0.450442	-0.0889883	0.622854
AT3G59710	-0.542003	0.242584	0.241676	0.567525	-0.693866	0.0898128	-0.368925
AT4G37110	-0.753184	-0.755915	-0.851382	-0.814849	0.140382	0.0421833	0.0814483
AT1G67980	4.7905	3.48955	5.95931	5.04474	-1.60165	-0.432837	-0.0464551
AT5G58600	0.450183	0.633911	0.102388	0.278859	-0.0702077	-0.418002	-0.42526
AT3G04060	1.66564	1.14083	1.52703	1.03592	0.193948	0.0553396	0.0890384
AT1G01040	0.36955	-0.255443	-0.563307	-1.69146	0.840834	-0.0920223	-0.595182
AT3G46690	4.07082	2.74949	5.68937	4.78543	-2.75615	-1.1376	-0.720213
AT5G15680	0.402764	-0.323891	-0.463274	-1.94308	0.775257	-0.0907809	-0.843932
AT4G02900	-0.0571305	-0.586238	-0.612177	-1.05963	0.410995	-0.144051	-0.0623965
AT2G25480	-0.498669	-1.00305	-1.23896	-1.83477	0.653829	-0.0864629	-0.177898
AT1G63250	0.312937	-0.41423	-0.614605	-1.399	0.518666	-0.408876	-0.466101
AT5G06620	-0.470079	-0.105187	0.0148499	0.584914	-0.333129	0.1518	0.356973
AT5G65170	0.757592	0.507358	-0.0180642	-0.490387	0.169548	-0.606108	-0.828196
AT3G17740	0.467128	-0.142885	-0.378447	-1.23618	0.488294	-0.357281	-0.605004
AT5G39330	-0.00417109	0.161032	-0.0817521	0.458643	0.0372218	-0.0403593	0.334833
AT1G68890	-0.493181	-0.975034	-0.903197	-1.90536	0.608667	0.198651	-0.321658
AT2G35290	1.52449	1.44901	1.63492	1.56773	-0.127054	-0.0166184	-0.00832646
AT4G13320	0.126221	0.563739	0.0683561	0.570176	-0.0623912	-0.120256	-0.0559544
AT4G23150	2.85183	2.08619	2.54272	1.64416	0.213565	-0.0955452	-0.228463
AT5G18820	-0.12801	-0.639047	-0.674896	-1.5582	0.485952	-0.0609341	-0.433202
AT3G42806	-0.123937	0.264273	-0.0978708	0.362369	0.0560333	0.0820994	0.154129
AT1G74030	0.293086	-0.608236	-0.423296	-1.68378	0.233267	-0.483115	-0.842279
AT5G10970	-0.831134	-0.374504	-0.433123	-0.00611867	-0.0647927	0.333219	0.303593
AT1G12700	-0.570362	-0.492868	-0.486791	-0.435178	0.170534	0.254104	0.228225
AT5G51795	-0.142586	0.111297	-0.650177	0.0590773	0.286216	-0.221375	0.233996
AT3G09190	-1.04162	-0.659901	-0.883881	-0.0660177	-0.0715332	0.0862047	0.52235
AT3G25620	-0.214626	-0.184479	-0.299879	-0.476507	0.124885	0.0396314	-0.167144
AT2G39850	-0.115729	-0.866918	-1.24429	-2.87639	0.832829	-0.295733	-1.17664
AT2G45870	0.361955	0.161983	0.165813	-0.183363	-0.290631	-0.486773	-0.635977
AT5G46130	-0.155231	0.148498	0.435683	0.963842	-0.3581	0.232814	0.457243
AT4G16310	0.305054	-0.504888	-0.572405	-2.28029	0.95619	0.07873	-0.819215
AT3G12110	-0.590502	-0.389128	-1.09901	-1.04651	0.635395	0.126883	-0.0219867
AT3G19080	-0.153968	-0.457854	-0.837163	-1.54008	0.277805	-0.40539	-0.804422
AT3G26134	0.461206	0.25662	0.419361	0.915488	-0.164752	-0.206598	0.494116
AT5G57567	0.423484	-0.0155503	-0.366402	0.789824	0.25728	-0.532605	1.06265
AT1G32960	6.01146	3.72298	3.97508	1.4023	0.872787	-1.1636	-1.4479
AT2G47410	0.377227	-0.511539	-0.531676	-1.98437	0.814265	-0.0946383	-0.658564
AT1G74390	0.004016	-0.431184	-0.525995	-1.12767	0.279523	-0.250488	-0.416958
AT1G72970	-1.60598	-0.704181	-1.43314	-0.776929	-0.101328	0.0715142	-0.174076
AT3G60200	0.0690545	0.612324	-0.103142	0.492389	0.519757	0.34756	0.399822
AT1G10460	-1.11832	-0.156548	-0.498613	0.680778	-0.0809694	0.538734	0.756357
AT1G58230	0.495785	-0.441119	-0.463418	-1.57411	0.903933	-0.0552713	-0.229061
AT3G11340	5.51465	5.90142	4.66269	5.27178	0.594565	-0.257398	-0.0350725
AT3G26816	-1.31441	0.409224	-2.11633	-0.441754	0.925335	0.123413	0.0743565
AT2G47200	2.31402	1.44749	2.91885	3.17853	-0.975497	-0.37067	0.75554
AT4G33610	3.77041	1.63881	6.18667	3.1328	-3.2118	-0.795535	-1.71782
AT5G59580	6.31522	5.10418	6.83665	6.02195	-0.107358	0.414079	0.810414
AT3G25440	-0.359084	-0.363172	-0.852254	-1.18162	0.465934	-0.0272365	-0.352517
AT1G77640	2.15388	3.99112	2.80138	2.0877	0.516593	1.1641	-1.38682
AT4G33130	1.11376	0.911789	0.475894	1.14038	-0.47247	-1.11033	-0.243876
AT1G77960	-0.462449	-0.423399	-0.437375	-0.71359	-0.846897	-0.821823	-1.13709
AT3G11440	0.344527	0.0960017	-0.148856	-0.477573	0.348407	-0.144976	-0.225167
AT5G37260	-0.254735	0.0324014	0.25842	0.162738	0.359686	0.872841	0.490023
AT5G59845	0.46872	0.317099	-0.400902	0.636062	-0.147459	-1.01708	0.171505
AT1G49490	-0.708181	-0.0709386	-0.435804	-0.0623831	-0.085852	0.186525	-0.0772965
AT5G16230	-0.0478256	0.0989373	-0.239554	-0.406096	0.172876	-0.0188526	-0.332158
AT3G62780	1.7752	2.00453	1.67201	1.83187	0.528938	0.42574	0.356276
AT1G21580	0.280434	-0.561056	-0.716053	-1.99702	0.971283	-0.0252036	-0.464684
AT1G08270	0.472622	0.245434	-0.116931	-0.0824159	0.42187	-0.167683	0.0940206
AT4G38480	0.10229	0.126068	-0.140612	0.293363	-0.146767	-0.389669	0.0205273
AT3G47580	-0.439203	-0.338221	-0.192958	-0.512998	0.0298871	0.276132	-0.14489
AT3G59890	-0.766066	-0.458992	-0.558421	0.490648	-0.263247	-0.0556017	0.686393
AT2G26710	-0.982466	-1.04354	0.0795863	-1.03204	0.0944703	1.15652	0.10597
AT5G56300	2.27932	1.67894	2.1577	2.69643	-0.232584	-0.354209	0.78491
AT4G35070	0.279247	0.3496	0.563689	0.504584	-0.125688	0.158754	0.0292954
AT1G73450	0.120805	-0.549462	-0.615982	-1.54708	0.621502	-0.115285	-0.376113
AT4G25610	0.49798	-0.27731	-0.111384	-1.32743	0.453852	-0.155512	-0.596265
AT1G10040	1.72103	1.08781	0.685108	0.56977	0.25154	-0.784379	-0.2665
AT4G21530	-0.417281	-0.528162	-0.760299	-1.34318	0.289806	-0.0532122	-0.525214
AT1G30610	0.137879	-0.750039	-0.72555	-1.85494	0.775669	-0.0877597	-0.329237
AT2G20835	-1.36298	0.0820933	-0.637816	-0.300092	0.743117	1.46828	0.360931
AT1G52910	1.68002	1.75876	2.08451	2.23919	-0.292222	0.112274	0.188211
AT1G15580	-0.831596	-0.700741	0.91537	0.704328	-0.946823	0.800142	0.458245
AT4G28230	-0.0943998	-0.150275	-0.482443	-1.3632	0.257219	-0.130823	-0.95571
AT4G32730	0.0757575	-0.42021	-0.25375	-0.897641	0.202567	-0.126941	-0.274864
AT5G16420	0.49613	0.123086	0.105577	-0.256113	0.201164	-0.189389	-0.178034
AT1G32760	-0.692137	0.0155105	-0.387194	0.169986	-0.0411837	0.26376	0.113292
AT5G20610	0.586445	-0.381837	-0.596333	-2.03228	0.801999	-0.380778	-0.848443
AT4G27852	2.55842	1.01505	1.72571	0.809666	0.106339	-0.726372	-0.0990495
AT3G49210	1.31102	0.338622	0.493766	-0.332514	0.427405	-0.389848	-0.243731
AT1G65440	0.391265	-0.473737	-0.815673	-2.01373	1.1389	-0.0680425	-0.401101
AT2G40820	0.0515001	-0.811769	-0.943546	-1.86551	0.60414	-0.390906	-0.449603
AT2G36540	0.0776612	0.598138	0.579313	0.975233	-0.0159593	0.485693	0.361136
AT1G62130	0.183463	-0.194002	-0.675363	-1.15268	0.59188	-0.266946	-0.366802
AT5G51350	0.577287	0.213458	0.589226	-0.228206	-0.205035	-0.193096	-0.646699
AT2G04515	2.29787	2.30784	2.76882	3.11259	0.00974153	0.480688	0.814493
AT5G23950	1.37562	0.259254	0.54808	0.711023	0.115901	-0.711641	0.56767
AT4G21220	-0.0834381	0.311663	-0.036617	0.875121	-0.173821	-0.127	0.389637
AT2G40160	0.197095	0.229603	-0.202165	0.257423	0.156455	-0.242805	0.184275
AT3G25430	-0.0385555	-0.236238	-0.67265	-0.742053	0.256743	-0.377351	-0.249071
AT5G50760	1.49057	1.36381	1.09475	1.28991	0.485482	0.089669	0.411591
AT3G04740	0.206555	-0.385102	-0.548129	-2.46036	0.713675	-0.0410083	-1.36158
AT5G01110	-0.167855	-0.24294	-0.388743	-0.27291	0.220111	-0.000776933	0.190141
AT5G44380	4.9722	2.77235	5.92362	3.7547	-1.28929	-0.337872	-0.30694
AT5G43730	0.234137	-0.280462	-0.220876	-0.677991	0.412238	-0.0427753	0.0147088
AT5G51540	-0.128222	-0.50724	-0.826115	-1.77097	0.463879	-0.234014	-0.799847
AT1G49530	1.73337	0.970878	1.15971	-0.0717954	0.483879	-0.0897817	-0.558795
AT4G03190	-0.813222	-0.582478	-1.02595	-1.18739	0.30012	0.0873923	-0.304788
AT3G48120	-0.0142431	-0.512506	-0.8558	-1.33142	0.270937	-0.57062	-0.547982
AT1G35220	0.850087	0.095085	0.188694	-0.851743	0.384555	-0.276838	-0.562273
AT1G79560	-0.0853918	-0.792265	-1.04895	-2.13134	0.747261	-0.216301	-0.591818
AT3G54280	-0.168254	-0.725125	-0.760737	-2.09677	0.737246	0.144763	-0.634401
AT4G24270	0.0343021	-0.416641	-0.766748	-1.91357	0.770294	-0.0307558	-0.726635
AT2G46630	-0.23182	-0.499902	-0.809041	-0.952945	0.00916774	-0.568053	-0.443876
AT3G20090	-0.450071	-0.140705	-0.32431	0.169587	-0.154289	-0.0285283	0.156003
AT1G32930	0.234569	-0.054785	-0.261237	-0.00296207	0.164659	-0.331147	0.216482
AT5G44540	0.0125617	0.298409	0.0649991	0.779156	-0.177386	-0.124948	0.303361
AT3G15140	-0.25543	-0.259758	-0.187342	0.147773	-0.249225	-0.181137	0.158307
AT3G63300	0.206973	-0.0574349	0.311484	0.0146044	-0.180423	-0.0759123	-0.108384
AT3G48870	-0.0491839	-0.726238	-1.01322	-2.13246	0.943063	-0.0209735	-0.463159
AT5G47940	0.490865	-0.404285	-0.416006	-1.41408	0.596033	-0.310838	-0.413762
AT5G17910	0.640399	-0.447835	-0.452472	-1.83824	1.00843	-0.0844434	-0.381981
AT2G18370	4.33546	2.92926	17.5748	18.8634	-17.3313	-3.08593	-0.391215
AT2G23590	-0.983178	-0.448794	-0.838372	-0.238293	-0.0594365	0.0853688	0.151064
AT4G10600	-0.431885	0.0474995	-0.371616	0.0965477	0.408078	0.468347	0.457126
AT2G30933	-0.00607469	-0.109855	0.0158059	0.22935	-0.0848735	-0.0629929	0.254331
AT4G33905	0.871187	0.407867	1.81807	0.86816	-0.683488	0.263394	-0.223195
AT4G29790	0.51782	-0.284028	-0.407072	-1.73435	0.857589	-0.0673024	-0.592728
AT1G21150	-0.330973	-0.156732	-0.605269	-0.00869896	-0.0395876	-0.313884	0.108445
AT5G03800	-0.377479	-0.74562	-0.951787	-1.20227	0.0849254	-0.489383	-0.371725
AT1G54000	6.24602	5.33108	21.6725	20.8782	-16.8015	-0.369083	-0.248465
AT2G26692	0.132405	0.0575124	-0.0393965	0.180128	0.197685	0.0258843	0.320301
AT1G69020	0.388743	0.249356	-0.384342	-0.302752	0.443981	-0.329105	-0.108126
AT4G17970	0.251902	-0.0891741	0.270581	-0.947071	0.289909	0.308588	-0.567988
AT5G55950	-1.34364	-0.455222	-0.400142	0.299539	-0.377687	0.565808	0.377073
AT2G41220	0.206095	-0.558497	-0.618043	-2.00619	0.780248	-0.0438898	-0.66745
AT1G73830	-1.386	-0.556041	-0.631832	-0.0515365	0.563948	1.31811	1.06845
AT5G19221	-0.522842	-0.390804	-0.798944	-0.88787	0.524412	0.248309	0.0273454
AT2G29760	0.0754073	-0.524148	-0.43717	-0.639839	0.212522	-0.300055	0.0968321
AT3G04010	1.50034	0.652808	1.18263	0.687291	-0.0210263	-0.338735	0.013457
AT5G45780	0.232735	-0.0578691	-0.025179	-0.213988	0.18355	-0.0743642	0.027431
AT5G35120	-0.416024	-0.188177	-0.902578	-0.683605	-0.47531	-0.961863	-0.970738
AT4G01130	0.198084	0.230844	-0.0146066	0.359209	-0.00834572	-0.221036	0.120019
AT5G28490	-0.119705	-0.0708693	-0.833553	-0.749763	0.487072	-0.226776	-0.191821
AT3G60490	1.46585	1.21159	1.00935	1.17907	0.191102	-0.265399	0.158577
AT5G40740	0.0202023	-0.329872	-0.532355	-1.32622	0.574091	0.0215343	-0.422254
AT5G06730	4.40562	3.42906	3.80792	2.73483	-0.0251029	-0.622802	-0.719342
AT1G74250	0.309093	-0.431825	-0.729329	-2.89622	1.07095	0.0325321	-1.39344
AT5G38310	2.88757	2.74026	3.04666	2.82611	0.357666	0.516749	0.443514
AT4G10695	0.201553	-0.665375	-0.659254	-0.510541	0.34219	-0.518617	0.497023
AT1G68872	0.0927483	0.150786	-0.114989	0.371894	-0.0309487	-0.238686	0.190159
AT5G54569	-0.0360151	-0.0774184	-0.672933	-0.784029	0.487037	-0.14988	-0.219573
AT3G06520	-0.272561	0.0206801	-0.268296	0.328072	0.187844	0.192109	0.495237
AT5G55840	-0.00511344	-0.324955	-0.312104	-0.766032	0.383278	0.0762876	-0.0577995
AT3G51300	-0.406969	-0.154275	-0.505662	0.416301	-0.222168	-0.320862	0.348408
AT1G66600	4.87092	5.303	5.04876	5.74554	-0.374885	-0.197046	0.067655
AT1G08050	2.07093	1.54392	1.69986	0.678599	0.179264	-0.191802	-0.686052
AT1G10270	0.226223	-0.17074	-0.376964	-1.55464	0.471252	-0.131935	-0.912644
AT3G04380	-0.0344858	-0.347162	-0.363176	-0.0217922	0.123441	-0.205249	0.44881
AT2G40550	-0.00193119	-0.0295047	0.0449492	-0.51869	0.0670567	0.113937	-0.422129
AT3G47530	0.20698	0.0267882	0.21981	-0.12942	-0.317335	-0.304505	-0.473543
AT1G12290	0.765851	0.326604	0.290843	-0.194816	0.567468	0.0924608	0.0460477
AT3G47780	1.34123	0.0466411	0.791936	-0.883879	0.191671	-0.357626	-0.738849
AT2G21710	-0.202634	-0.419935	-0.358786	-0.620496	0.181291	0.0251385	-0.01927
AT1G53345	-0.519234	-0.00130814	-0.317728	-0.0320779	0.335273	0.536779	0.304503
AT1G74600	0.653541	0.441155	0.730609	0.0304766	0.205343	0.282411	-0.205336
AT2G26360	-0.12102	0.332807	-0.177786	0.674903	-0.239525	-0.296291	0.102571
AT3G13225	0.421587	-0.323543	-0.308547	-1.82198	0.620308	-0.109825	-0.878124
AT5G56840	-0.524303	0.966219	-0.38491	0.20255	0.534648	0.67404	-0.229021
AT1G69430	-0.302987	-0.106856	0.32321	0.672171	-0.225188	0.401009	0.553839
AT4G07400	-0.765658	-0.187258	-0.762031	-0.346478	0.337622	0.341249	0.178403
AT1G50270	-0.17134	-0.172221	-0.275572	-0.500532	0.305548	0.201317	-0.0227622
AT1G68700	0.746909	-0.20325	0.626896	-0.0218016	-0.150829	-0.270841	0.03062
AT1G02660	0.871968	-0.140671	0.539497	-0.732984	0.734785	0.402315	0.142472
AT2G19260	0.572694	-0.467255	-0.278033	-1.32353	0.716308	-0.134419	-0.139967
AT5G56050	1.31915	0.488619	1.33187	0.231454	-0.58291	-0.570197	-0.840074
AT5G45340	-0.018723	0.285083	-0.124038	-0.372032	0.440494	0.335179	-0.216621
AT3G23730	-0.384096	1.34366	-0.586057	0.70925	0.438268	0.236307	-0.196141
AT4G39050	-0.134922	-0.651617	-0.764414	-2.48038	0.811174	0.181682	-1.01758
AT3G21710	1.62208	0.707741	1.20028	1.65761	-0.54417	-0.965971	0.405701
AT4G24275	2.13868	1.87387	-0.569421	0.970581	0.721231	-1.98687	-0.182059
AT3G22180	0.633758	-0.0683225	0.178526	-0.828582	0.316189	-0.139044	-0.44407
AT2G39560	-1.69109	-0.483245	-1.03776	0.483219	-0.249691	0.403642	0.716773
AT2G15480	0.364781	0.348625	0.0387235	-0.142838	-0.0358406	-0.361898	-0.527304
AT1G02380	-0.742152	-0.198181	-0.864732	-0.298701	0.334334	0.211755	0.233815
AT4G33200	0.268991	-0.464645	-0.656522	-1.80824	0.837965	-0.0875483	-0.505633
AT1G64180	0.600468	-0.565505	-0.745324	-2.15107	0.714865	-0.630927	-0.870699
AT4G09432	0.267484	-0.0611011	0.00881249	-0.235993	-0.0265087	-0.28518	-0.2014
AT2G05120	-0.0375598	-0.462822	-0.636086	-1.6246	0.547536	-0.0509907	-0.614239
AT2G41370	-0.991514	-0.604827	-0.986641	-0.49514	0.31806	0.322933	0.427747
AT1G18940	-0.126794	0.174197	0.226714	0.482822	-0.0965903	0.256918	0.212035
AT3G03370	0.0510257	-0.118814	0.200221	0.366424	-0.374907	-0.225712	0.110331
AT5G56530	-0.922962	-0.664229	-1.24889	-0.757156	0.218178	-0.107747	0.125251
AT2G18000	1.0386	1.0887	1.46793	1.85927	-0.324027	0.105309	0.446548
AT2G26650	0.931029	0.490707	-0.10761	-1.15468	0.725239	-0.3134	-0.920143
AT5G02670	0.240373	-0.425089	-0.483459	-0.741273	0.547355	-0.176477	0.231172
AT3G02140	0.713287	0.558256	0.114039	-0.377284	0.831751	0.232503	-0.10379
AT3G09960	6.49705	4.55849	21.7145	20.3791	-16.0904	0.133022	0.736222
AT2G27170	0.435968	-0.611644	-0.568229	-1.64928	0.954576	-0.0496212	-0.0830557
AT5G46910	0.266006	-0.401061	-0.0811371	-1.38638	0.386433	0.0392895	-0.598884
AT4G03090	0.0213322	-0.484739	-0.4693	-1.36236	0.376727	-0.113905	-0.500896
AT4G16680	1.0327	0.0525811	-0.195269	-1.26391	0.815689	-0.412279	-0.500799
AT5G24352	0.452081	0.118858	-0.453627	-1.06891	0.698508	-0.2072	-0.489262
AT1G05550	0.466803	0.662729	0.132344	0.637219	0.164854	-0.169605	0.139343
AT1G61420	2.27156	1.00425	1.75319	0.679328	0.346095	-0.172282	0.0211732
AT1G70320	0.436067	-0.474385	-0.677162	-2.27014	1.13619	0.02296	-0.659564
AT3G21540	0.37638	-0.377786	-0.621861	-1.94308	0.756208	-0.242033	-0.809086
AT4G21230	2.00554	1.05762	1.55174	0.988478	0.206772	-0.247026	0.137633
AT3G48830	0.00514381	-0.200371	-0.272442	-0.310851	0.0521298	-0.225456	-0.0583501
AT3G50110	0.00851362	-0.445138	-0.406365	-1.25691	0.224708	-0.190171	-0.587067
AT5G52250	-0.139548	0.216709	-0.272208	-0.61477	0.788173	0.655513	-0.043306
AT4G31360	-0.289656	-0.00666285	-0.720879	-1.09181	0.540617	0.109394	-0.544531
AT5G08480	-0.602512	-0.157417	-0.566526	0.222913	0.0422603	0.0782459	0.42259
AT4G39420	0.608709	-0.299929	-0.395002	-1.41255	0.779299	-0.224412	-0.333322
AT1G61215	-0.300652	-0.222856	-0.234764	-0.369096	-0.1288	-0.0629111	-0.27504
AT3G06480	0.242827	-0.225046	-0.72771	-1.55049	0.697221	-0.273315	-0.628224
AT5G09480	3.08739	1.94259	3.63175	2.08329	-1.59733	-1.05297	-1.45663
AT5G46640	-0.610904	-0.110137	-0.491804	0.0331791	-0.225689	-0.106589	-0.0823726
AT1G31360	0.0985281	-0.398325	-0.581112	-1.36948	0.653916	-0.0257241	-0.317239
AT5G20730	0.575427	-0.301407	-0.217879	-2.19745	0.622591	-0.170716	-1.27345
AT2G17150	0.458798	-0.455093	-0.431901	-1.28567	0.518715	-0.371984	-0.311866
AT5G26790	-0.984294	-0.165753	-0.622142	0.927757	-0.968883	-0.606731	0.124626
AT3G59420	-0.121175	-0.390714	-0.547703	-1.39819	0.456898	0.0303703	-0.550582
AT3G43960	-0.794557	-0.456654	-1.32917	-1.24927	0.568253	0.0336448	-0.224366
AT3G22900	-0.600494	0.0451967	-0.131165	0.649869	0.123682	0.593012	0.728355
AT4G32710	-0.116002	-0.246077	-0.306652	-0.621067	0.199901	0.00925084	-0.175089
AT5G20790	-1.332	-1.06853	-1.6943	-1.02852	-0.095421	-0.457722	-0.0554042
AT5G43310	0.428929	-0.567996	-0.416538	-2.53018	0.937777	0.09231	-1.02441
AT3G45850	-0.0549498	-0.907806	-1.22322	-2.62118	0.925757	-0.242515	-0.787617
AT2G37362	-0.0394836	-0.369116	-0.280737	-0.928795	0.166909	-0.0743442	-0.39277
AT4G23750	-1.26198	-0.522442	-0.786465	-0.860712	-0.478632	-0.00311447	-0.816902
AT5G65090	2.18459	1.065	1.84864	1.21718	-0.00609633	-0.342043	0.146084
AT2G46410	0.0999636	0.501165	-0.0564119	0.421049	0.0282301	-0.128145	-0.0518861
AT1G18320	-0.146005	0.0375941	-0.476074	0.209592	-0.0680655	-0.398134	0.103932
AT2G20320	0.678466	-0.303285	-0.273433	-2.07338	0.717211	-0.234687	-1.05289
AT5G66640	0.800999	0.531573	-0.542281	-0.925796	0.470075	-0.873205	-0.987294
AT1G17500	1.16302	0.227276	-0.165718	-1.18531	0.932486	-0.396254	-0.480099
AT3G45830	0.521138	-0.36549	-0.429247	-1.83137	0.81652	-0.133864	-0.649359
AT5G41060	-1.31955	-0.499832	-1.04299	-0.264685	0.0809357	0.357497	0.316083
AT2G33330	-2.04734	-0.59067	-1.38527	0.037933	-0.0430767	0.618993	0.585526
AT3G24020	0.875604	0.000702994	-0.277126	-0.220608	0.285464	-0.867266	0.0641533
AT1G15380	-0.0362088	0.46737	-0.354916	0.781012	0.0301736	-0.288534	0.343815
AT1G71460	-0.558848	-0.468804	-0.567942	-0.6267	0.179411	0.170317	0.0215148
AT3G56250	-0.0121971	0.118628	-0.369405	-0.623605	0.14179	-0.215418	-0.600443
AT5G51630	0.15167	-0.323725	-0.366435	-1.25723	0.55745	0.0393441	-0.37606
AT3G19250	0.835018	0.298441	0.594106	0.459598	-0.179237	-0.420149	-0.0180801
AT5G26160	0.565089	-0.147139	-0.12579	-0.784547	0.458215	-0.232664	-0.179193
AT5G45790	0.259715	-0.0492939	-0.0399119	0.0870046	0.482588	0.182961	0.618887
AT1G68940	-0.0109914	-0.151667	-0.437265	-0.356304	0.255213	-0.171061	0.0505751
AT1G18910	0.228921	-0.0670308	0.202418	-0.369961	0.286951	0.260448	-0.0159787
AT2G43580	1.71877	1.42352	3.7448	2.56272	-1.47948	0.546551	-0.340285
AT3G57700	23.3909	22.7876	6.11019	6.27918	17.1076	-0.173094	-0.406845
AT1G70060	0.385226	-0.554511	-0.78755	-1.97243	1.18162	0.00884545	-0.236295
AT1G57700	0.414133	-0.256816	-0.256722	-1.45012	0.266478	-0.404377	-0.926826
AT2G47220	-0.0963118	-0.274851	-0.455182	-1.17708	0.408856	0.0499861	-0.493372
AT3G21330	-0.786068	-0.262811	-0.418428	-0.551974	-0.0964511	0.271189	-0.385614
AT5G02320	0.172021	-0.0735289	-0.0866488	-1.00466	0.352149	0.0934794	-0.578987
AT2G26560	2.06214	1.84557	2.88952	2.54235	0.0506941	0.87807	0.747472
AT2G46590	-0.0835706	-0.0304245	0.0905692	0.353513	-0.128036	0.046104	0.255901
AT3G19190	0.887172	0.160885	0.105278	-1.37678	0.874786	0.0928919	-0.662879
AT5G24750	0.204754	-0.0779043	-0.269076	-0.17514	0.0396533	-0.434177	-0.0575824
AT5G57190	0.535182	0.0643941	0.188511	0.115618	-0.0109867	-0.357658	0.0402374
AT1G80280	1.07543	0.857695	0.0127074	-0.275685	-0.248275	-1.311	-1.38166
AT1G48370	1.63794	1.37043	1.15199	1.29941	0.190784	-0.295165	0.119772
AT5G38770	0.264691	0.790211	0.976666	0.936193	-0.714591	-0.00261642	-0.568609
AT3G56640	0.220078	-0.312131	-0.412259	-1.69899	0.423156	-0.209181	-0.963699
AT2G04033	-0.731439	-0.710002	0.257802	0.983532	-0.519638	0.469603	1.1739
AT5G05160	0.450435	-0.354913	-0.1266	-1.77559	0.072281	-0.504754	-1.34839
AT5G63650	0.439796	-0.150117	-0.208207	-0.962279	0.316692	-0.331311	-0.49547
AT4G38380	-0.178738	-0.218534	-0.519007	-0.523741	0.195426	-0.144843	-0.109781
AT3G58820	-0.417503	-0.593611	-0.438518	0.0700551	-0.123758	-0.144772	0.539909
AT2G42395	-0.51978	0.0498263	0.220028	0.578825	-0.25437	0.485438	0.274629
AT2G44370	3.29544	2.21348	4.8291	3.97471	-1.13982	0.393832	0.621401
AT5G45650	-0.81594	-1.14046	-1.22841	-2.0319	0.677222	0.264756	-0.214214
AT2G02410	-0.297852	-0.276215	-0.185726	0.163503	0.14212	0.254246	0.581838
AT5G23240	2.62529	-1.34761	3.19992	0.897834	-1.81715	-1.24253	0.428289
AT2G31270	0.0771352	0.0873485	0.147134	-0.0327467	-0.0953534	-0.0253545	-0.215449
AT4G09920	-0.532526	-0.253535	-0.052951	0.523048	-0.309789	0.169786	0.466794
AT1G19830	0.282523	0.951697	-1.5741	1.29006	-0.0441073	-1.90073	0.294254
AT5G54710	0.23524	-0.0484121	-0.36097	-1.10475	0.750724	0.154515	-0.30561
AT5G48040	-0.22116	-0.229634	-0.662345	-0.681236	0.113788	-0.327397	-0.337814
AT5G07610	-0.363755	-0.151761	-0.198234	0.201273	-0.0337439	0.131777	0.319291
AT4G13190	2.41688	0.774639	1.28317	1.00158	0.0810096	-1.0527	0.307947
AT4G39230	1.0407	0.0908463	0.673614	-0.862232	0.114558	-0.25253	-0.838521
AT4G12840	0.102917	-0.214181	-0.210239	-0.143733	0.4477	0.134544	0.518147
AT4G33620	0.400292	-0.197933	-0.0303472	-1.01726	0.578728	0.148088	-0.240597
AT1G24090	0.531116	0.619048	1.48907	1.50032	-0.400833	0.557119	0.480442
AT1G73010	0.944522	0.483055	1.63259	0.944628	-0.517947	0.170121	-0.056374
AT4G37620	0.479582	0.919802	0.845709	0.814574	-0.177283	0.188844	-0.28251
AT1G69900	-0.0154415	0.743569	-0.101514	0.0286028	0.301746	0.215673	-0.41322
AT5G67310	5.73471	3.64492	3.47002	2.35975	1.13323	-1.13147	-0.151946
AT4G03230	0.505611	-0.374365	-0.591815	-0.860866	0.443971	-0.653455	-0.0425307
AT2G07739	-0.0112671	-0.640869	0.149644	0.926632	-0.0750525	0.0858581	1.49245
AT4G15850	0.04854	-0.286182	-0.791088	-1.36259	0.518874	-0.320754	-0.55754
AT1G64300	0.309772	-0.153262	-0.181459	-0.537936	0.322841	-0.16839	-0.0618323
ATCG00350	-0.501175	-0.646301	-1.3758	-1.5348	0.524825	-0.349803	-0.363677
AT5G38280	1.8675	0.555075	1.40904	0.387691	0.0408879	-0.417573	-0.126496
AT5G13920	-0.34532	-0.26674	-0.0780672	0.126436	-0.147722	0.119531	0.245455
AT5G27030	0.248991	-0.284355	-0.327554	-2.33227	0.646996	0.0704514	-1.40092
AT5G45469	-0.740253	0.0586791	-0.673848	0.321448	0.0762004	0.142606	0.33897
AT5G09690	0.45985	0.108615	-0.648811	-0.887624	0.601036	-0.507625	-0.395203
AT4G26670	-0.530306	-0.0859355	0.0946522	0.982452	-0.435648	0.18931	0.63274
AT2G24440	-0.151785	0.247079	-0.323678	0.126025	0.345391	0.173499	0.224338
AT4G36280	0.0636877	-0.0663384	-0.118491	-0.584357	0.0284077	-0.153771	-0.489611
AT5G59240	0.909753	0.914952	0.631383	0.899883	-0.0449029	-0.323273	-0.0599727
AT3G07610	0.504334	0.0238083	-0.441936	-1.57927	0.926498	-0.019773	-0.676578
AT1G62400	0.0607411	-0.0455758	-0.345552	-1.10822	0.183288	-0.223004	-0.879355
AT5G17850	0.917774	0.775662	0.999339	0.98933	-0.0241689	0.0573957	0.189499
AT1G47578	-0.450457	-0.353789	-0.862036	-0.333265	0.164516	-0.247062	0.18504
AT2G02980	-0.646944	-0.549398	-0.293429	-0.0352949	0.180273	0.533788	0.694375
AT2G27140	0.171662	-0.0879052	0.17742	-0.346214	0.223576	0.229334	-0.034733
AT2G38440	0.432767	-0.438029	-0.690167	-2.4929	1.00286	-0.120074	-1.05201
AT1G72730	0.149664	-0.219246	-0.0886818	-0.31822	-0.0641928	-0.302539	-0.163167
AT4G14860	-0.494649	0.360969	-0.34574	0.429282	-0.170044	-0.0211353	-0.101732
AT2G03540	1.39014	0.628676	-0.366159	-0.270643	0.921881	-0.83442	0.0225621
AT5G66455	-0.0113899	0.0703423	-0.0260429	0.6319	-0.147344	-0.161997	0.414214
AT5G16340	0.498073	0.20361	-0.481421	-0.632354	0.499375	-0.480119	-0.336589
AT1G67600	-0.25679	0.173458	0.0518292	0.660037	-0.00466581	0.303953	0.481913
AT2G38823	-0.514774	-0.239594	-0.23804	0.200451	-0.137783	0.138951	0.302261
AT1G05910	0.354326	-0.308157	-0.456379	-2.13525	0.571229	-0.239476	-1.25587
AT2G25220	0.550606	1.02819	-0.414185	0.607775	0.444754	-0.520037	0.0243351
AT1G14660	0.302172	0.147609	-0.346557	-0.396094	0.378325	-0.270404	-0.165378
AT4G36610	3.24658	1.20576	5.04555	2.61981	-2.83552	-1.03655	-1.42147
AT5G04230	-0.542722	-0.51239	-0.748667	-1.56821	0.420943	0.214998	-0.634872
AT5G66080	-0.379912	0.666284	-0.648886	0.19767	0.243221	-0.0257542	-0.225393
AT5G65300	2.07299	1.54851	1.14166	1.04738	0.848402	-0.0829298	0.347276
AT3G61800	0.675894	-0.421836	-0.540896	-1.43876	0.689616	-0.527174	-0.327308
AT1G21610	0.228508	-0.33373	-0.476856	-1.57147	0.691317	-0.0140471	-0.546427
AT5G62820	0.0877176	0.025467	0.65991	0.475818	-0.409358	0.162835	0.0409934
AT5G65460	-0.263189	-0.826494	-0.969343	-2.06394	0.61565	-0.0905048	-0.6218
AT1G27960	0.08403	-0.19979	-0.216507	-0.166678	-0.0634019	-0.363939	-0.03029
AT2G02790	0.192516	-0.750019	-0.648198	-1.98267	0.630992	-0.209721	-0.601656
AT5G45260	0.35799	-0.43774	-0.504567	-1.67954	0.685374	-0.177183	-0.55643
AT2G28360	0.558751	-0.376474	-0.391791	-1.51816	0.58239	-0.368153	-0.559292
AT5G64530	-0.113918	-0.204101	0.110405	-0.00081425	-0.25989	-0.0355668	-0.0566028
AT1G07880	0.370042	-0.0137096	0.174678	-0.0129636	0.109575	-0.0857892	0.110321
AT3G60110	0.34369	-0.21738	-0.193319	-1.28359	0.448012	-0.088997	-0.618196
AT4G19650	-0.275115	-0.255597	-0.178868	-0.216854	0.172542	0.26879	0.211285
AT2G36370	0.268074	-0.134217	-0.0971297	-0.524669	0.3356	-0.029604	-0.0548524
AT3G45650	-0.138519	-0.267147	-0.911612	-1.04108	0.559143	-0.21395	-0.214792
AT3G44560	7.80554	7.58104	18.7984	18.6946	-15.6099	-3.61104	-3.49041
AT2G15220	0.51778	0.76482	0.391196	0.865203	-0.076622	-0.203206	0.0237612
AT2G42010	0.333723	-0.149562	-0.421359	-1.68908	0.679055	-0.0760271	-0.860462
AT5G28626	-0.501504	0.0540404	-0.216987	0.341639	-0.0778146	0.206702	0.209784
AT5G46220	-1.74069	-0.715622	-1.21828	-0.41316	0.377087	0.899504	0.67955
AT1G43910	1.06705	1.70956	1.08447	1.49683	-0.224018	-0.206593	-0.436749
AT1G34065	-0.786389	-0.252832	-0.400134	0.483752	-0.0599402	0.326314	0.676643
AT3G57300	0.364932	-0.67447	-0.694178	-2.72474	0.990079	-0.0690312	-1.06019
AT4G37250	0.0821309	-0.215734	-0.392372	-1.08919	0.467122	-0.00738057	-0.406331
AT3G03855	1.09378	0.44044	0.806786	-0.296892	0.390476	0.10348	-0.346855
AT5G42800	5.08591	5.24716	5.19971	5.69139	-0.575521	-0.461717	-0.131286
AT2G28160	0.476269	0.332368	0.896908	1.11984	-0.142985	0.277655	0.644489
AT3G26680	0.0399797	0.225127	-0.181722	0.270222	0.0757506	-0.145951	0.120845
AT5G47820	0.382266	-0.582965	-0.564645	-2.15819	1.00906	0.0621464	-0.566163
AT3G05360	1.75226	0.821265	0.746731	0.0695175	0.40788	-0.597646	-0.343867
AT2G38110	0.7378	0.542443	0.38043	0.215039	-0.336552	-0.693922	-0.663956
AT1G26570	-0.468511	-0.273712	-0.783833	-1.15715	0.333789	0.0184669	-0.549646
AT2G32235	-0.446168	0.0856291	0.138352	1.37916	-0.682687	-0.0981673	0.610848
AT3G25730	0.514053	0.20185	0.411744	0.0310307	0.077084	-0.0252253	-0.0937356
AT3G26910	0.647909	-0.0244441	0.0641379	-1.6884	0.504348	-0.0794228	-1.15961
AT1G52620	-0.0264559	-0.0918361	-0.312233	-0.505738	0.295248	0.00947032	-0.118654
AT3G56570	-0.416257	-0.162385	-0.563695	-0.653516	0.253963	0.106525	-0.237167
AT5G05180	0.426599	-0.0701999	0.182407	-0.598345	0.425349	0.181157	-0.102796
AT4G34930	-0.037173	-0.0481946	-0.322158	0.0830182	0.372213	0.0872278	0.503425
AT5G17370	0.41516	-0.0459894	-0.184788	-0.717489	0.688816	0.0888674	0.0173163
AT3G06455	-0.211213	-0.20218	-0.504009	-1.10678	0.416511	0.123715	-0.488086
AT4G20400	0.206291	-0.601685	-0.644191	-2.10139	0.785817	-0.0646646	-0.713886
AT1G78530	1.69585	0.302838	2.24498	0.812941	-0.0942113	0.45492	0.415892
AT1G06740	-0.0169515	-0.394952	-0.609607	-0.942959	0.329622	-0.263033	-0.218385
AT1G21650	0.155701	-0.531877	-0.509115	-1.26651	0.354017	-0.3108	-0.380616
AT3G57430	0.275412	-0.290964	-0.465453	-1.08364	0.439207	-0.301658	-0.353467
AT2G38770	0.206305	-0.383401	-0.804759	-1.84286	0.839109	-0.171955	-0.620349
AT5G40330	-0.203442	0.344232	-0.24397	0.341915	0.201866	0.161337	0.199549
AT1G22065	0.398951	0.588603	0.718863	1.20073	-0.0747908	0.245121	0.537338
ATCG00660	-0.971536	-0.0602045	-0.0135316	0.307119	-0.537258	0.420746	-0.169935
AT1G74160	0.140319	-0.729655	-0.60556	-2.07968	0.732961	-0.0129176	-0.617067
AT3G29250	4.06179	3.36721	4.30685	3.75605	-0.965775	-0.720713	-0.576945
AT3G27870	0.0597642	-0.371974	-0.29454	-0.620691	0.184923	-0.169381	-0.0637928
AT5G16980	-0.0567841	-0.136076	-0.200229	0.435626	-0.323488	-0.466933	0.248215
AT4G03250	-0.0142566	-0.370375	-0.601838	-1.22213	0.455974	-0.131608	-0.395781
AT4G19560	-0.24389	-0.204963	-0.326802	-0.280307	0.366035	0.283123	0.29069
AT5G34790	0.567357	0.424457	-0.582772	-1.43028	0.547895	-0.602234	-1.30684
AT4G40085	0.0515562	0.51095	0.215319	0.295084	0.288091	0.451853	0.072225
AT1G63490	0.265132	-0.514107	-0.48643	-1.84455	0.62596	-0.125601	-0.704487
AT3G46920	0.485102	-0.315153	-0.643601	-2.15074	1.00411	-0.12459	-0.831472
AT2G28140	2.55984	1.76946	2.95936	2.17714	-0.439373	-0.0398563	-0.0316915
AT1G47410	-0.563588	-0.342577	-0.2115	-0.304544	0.15238	0.504467	0.190413
AT1G26762	0.339205	0.103285	1.0622	0.664333	-0.22111	0.501888	0.339937
AT1G07490	-1.37373	-0.689267	-0.030149	0.770584	-0.278011	1.06557	1.18184
AT1G27420	0.39761	-0.0154774	-0.627487	-0.413949	0.169154	-0.855944	-0.229318
AT2G45080	-0.753124	0.44064	-0.684887	1.07835	-0.242369	-0.174131	0.395344
AT2G46200	0.265008	-0.121008	-0.36455	-0.836786	0.571336	-0.0582217	-0.144441
AT1G51370	-0.148972	-0.256573	-0.33146	-0.335076	0.322322	0.139834	0.243819
AT4G32000	-0.894524	-0.641822	-0.843897	-0.607612	0.0749493	0.125576	0.10916
AT3G22961	-0.0625717	0.697271	0.503351	0.861427	0.195023	0.760945	0.359179
AT2G16250	0.0652291	0.0621654	-0.230585	-0.442887	0.257413	-0.0384016	-0.247639
AT2G25350	0.336608	-0.680259	-0.442628	-1.6433	0.747372	-0.0318646	-0.215673
AT2G34925	-1.83726	-0.560154	-1.09172	0.201054	-0.276525	0.469019	0.484683
AT3G54000	0.329493	0.145724	-0.452919	-0.628437	0.277347	-0.505065	-0.496814
AT3G02120	0.19365	0.402491	1.10592	0.385343	-1.05998	-0.14771	-1.07713
AT3G15400	-0.113678	-0.592104	-0.834691	-1.75464	0.436833	-0.28418	-0.725699
AT2G43000	2.1252	1.2114	2.12299	0.0707838	-0.450782	-0.452984	-1.59139
AT5G17880	0.595922	0.0761404	-0.0890788	-1.25793	0.88539	0.200389	-0.448684
AT1G31240	0.274925	-0.0541691	-0.0516676	-0.338822	-0.0305736	-0.357166	-0.315226
AT4G10890	-0.225455	-0.218394	-0.344409	-0.562016	0.439511	0.320557	0.0958891
AT1G55020	0.285854	-1.09238	-0.943937	-2.26082	0.461689	-0.768102	-0.706746
AT5G66540	0.408543	-0.478603	-0.643163	-1.84617	0.596485	-0.455221	-0.771084
AT4G37730	0.429244	0.31476	0.115877	0.152999	-0.288489	-0.601856	-0.45025
AT3G04220	3.92173	3.00896	3.53986	2.43066	0.141765	-0.240099	-0.436541
AT4G37710	23.9442	22.8404	23.2945	22.7573	0	0.356352	-0.0831028
AT1G73700	-0.220667	-0.0598631	0.15017	0.148876	-0.275164	0.0956734	-0.066425
AT5G22690	0.494845	-0.0619301	-0.37902	-0.882461	0.426818	-0.447047	-0.393714
AT5G20320	0.586687	-0.160157	-0.0398614	-1.69043	0.646794	0.0202457	-0.883483
AT5G64450	0.488988	0.449145	-0.318277	0.0835175	0.677282	-0.129982	0.311654
AT1G01770	0.412603	-0.4779	-0.249164	-1.42714	0.505873	-0.155895	-0.44337
AT1G04300	0.283867	-0.490767	-0.598819	-2.46638	1.00403	0.121345	-0.971579
AT1G73890	-0.191795	-0.365765	-0.27141	-0.104128	0.0833126	0.00369742	0.34495
AT4G31880	0.593625	-0.444504	-0.516292	-2.52202	0.999458	-0.110459	-1.07805
AT5G38730	-0.201319	-0.0574726	-0.0778804	0.160626	0.0767122	0.200151	0.294811
AT2G37930	-0.371925	-0.55935	-0.671019	-1.25626	0.368812	0.0697181	-0.3281
AT4G33160	0.746049	0.00898518	0.370464	-0.105248	-0.158076	-0.53366	-0.272309
AT3G25020	1.39283	1.06477	1.61727	0.129238	0.151126	0.375562	-0.784407
AT2G41510	0.224761	-1.40682	-1.45894	-2.20121	0.781885	-0.901812	-0.0125052
AT2G32280	1.89644	0.944908	3.91261	3.41569	-1.51235	0.503817	0.958435
AT1G74360	2.14338	0.586972	1.09255	-0.550265	0.742216	-0.308621	-0.395021
AT1G30010	0.0105096	-0.19082	-0.452991	-0.754744	0.136726	-0.326774	-0.427197
AT1G77855	-0.842016	-0.154914	-0.351364	0.0790621	-0.237069	0.253583	-0.00309348
ATCG01070	-1.6233	-0.444354	-0.0303404	0.361422	-0.490495	1.10247	0.315281
AT2G32765	-0.691588	0.220989	-0.1106	1.10605	-0.410249	0.170739	0.474811
AT1G05100	2.20576	1.47868	2.28238	0.920158	-0.348233	-0.271618	-0.906759
AT4G03440	0.0487252	-0.160297	-0.317894	-0.999541	0.286518	-0.080101	-0.552726
AT4G16745	0.251199	-0.0835044	-0.26542	-1.07966	0.126259	-0.39036	-0.8699
AT5G43820	0.414563	0.240006	0.312962	0.0823752	0.191524	0.0899234	0.0338937
AT5G27270	0.283128	-0.336329	-0.824041	-1.80748	0.869116	-0.238053	-0.602035
AT2G44440	-0.1892	-0.621132	-0.711928	-1.71177	0.0652286	-0.457499	-1.02541
AT5G08780	-0.20157	-0.702693	-1.08155	-1.80553	0.723782	-0.156202	-0.379051
AT4G39403	0.222841	-0.1657	0.0887149	-0.75123	0.274601	0.140474	-0.310929
AT3G11080	1.73249	0.911542	0.96203	-0.320622	0.281217	-0.489239	-0.950946
AT2G11880	-0.33879	-0.224124	-0.0475797	-0.311493	0.681933	0.973143	0.594564
AT1G56120	2.01158	2.12615	1.67094	0.590258	0.750247	0.409601	-0.785647
AT3G09230	0.0611022	-0.112185	-0.400166	-0.822746	0.36493	-0.0963383	-0.345631
AT1G49370	2.75795	1.6867	2.03953	1.7128	0.117637	-0.600779	0.143743
AT3G02160	0.0302372	-0.109189	-0.209584	-0.348157	0.313919	0.0740976	0.0749511
AT3G28857	-0.444676	-0.321113	-0.332944	0.887887	0.2045	0.316232	1.4135
AT5G49960	-0.272308	-0.482649	-0.537732	-1.01154	0.429554	0.16413	-0.0993388
AT3G25670	-1.26811	-0.422479	-0.995356	-0.155108	0.287131	0.559885	0.554502
AT5G60440	1.08595	0.924029	1.40016	1.40943	-0.339697	-0.0254895	0.145707
AT1G55820	0.147881	-0.364278	-0.262742	-1.03316	0.138436	-0.272188	-0.530442
AT4G10270	-0.120707	0.600954	0.95401	1.13434	-0.436249	0.638467	0.0971361
AT1G06370	-0.282679	-0.00169536	-0.345501	-0.405811	0.108017	0.0451946	-0.296098
AT4G25835	0.299648	-0.16448	-0.135057	-0.046027	0.540654	0.105948	0.659106
AT4G15233	2.57375	2.13592	2.50242	1.37384	0.510179	0.438849	-0.251902
AT3G45880	-0.208819	0.161498	-0.238713	0.493293	-0.208138	-0.238033	0.123657
AT4G05053	-0.215122	0.2628	0.195497	0.0160825	-0.123328	0.287291	-0.370045
AT3G52520	0.177504	0.850583	-0.722193	0.307293	0.0849277	-0.814769	-0.458363
AT3G52680	-0.345627	0.0726989	0.106088	0.53664	-0.109851	0.341864	0.35409
AT4G30180	1.14865	0.929173	0.223603	0.463985	0.401937	-0.523113	-0.0632521
AT1G16780	-0.38472	-0.530633	-0.977182	-0.833365	0.265263	-0.327199	-0.0374692
AT1G02430	-0.0345455	-0.227397	-0.455264	-0.455333	0.32221	-0.0985088	0.0942732
AT2G02120	1.4964	1.27198	0.739901	0.677859	0.221296	-0.535202	-0.372822
AT3G57600	0.235304	0.431847	0.340553	0.45725	0.0122493	0.117499	0.0376521
AT1G64210	4.91139	4.56409	4.19614	3.22134	0.671321	-0.0439313	-0.671427
AT5G04860	0.706966	-0.28708	-0.359608	-1.7722	0.751493	-0.31508	-0.73363
AT3G26782	0.176673	-0.0201268	-0.153725	-0.0825268	0.16457	-0.165828	0.10217
AT3G56000	0.208167	0.114786	-0.177423	-0.093828	0.297764	-0.0878258	0.0891501
AT5G38870	0.201764	0.0766389	-0.630127	-2.02834	1.13116	0.299269	-0.973824
AT1G34100	-0.086064	-0.0705157	-0.545462	0.0149675	-0.017806	-0.477204	0.0676772
AT2G45830	0.138422	0.147194	-0.057325	0.0084777	0.0904746	-0.105272	-0.0482414
AT5G09445	-0.246005	0.686526	-0.272298	0.745498	0.123544	0.0972509	0.182516
AT2G28650	0.738633	0.556304	0.436609	0.629097	-0.0199364	-0.321961	0.0528567
AT3G19740	0.458422	-0.131786	-0.551114	-2.21007	0.922795	-0.0867408	-1.15549
AT3G28455	-0.68671	-0.40435	-0.437347	-0.145704	-0.123601	0.125762	0.135045
AT1G14687	-1.00189	-0.268142	-0.368692	0.232579	-0.241591	0.391605	0.25913
AT1G79190	0.123771	-0.157729	-0.175054	-1.39847	0.485825	0.187	-0.754911
AT2G34300	0.672368	-0.0920251	-0.415541	-1.00097	0.562115	-0.525794	-0.346827
AT1G13170	-0.155173	-0.455139	-0.917841	-1.32243	0.398693	-0.363975	-0.468603
AT1G48315	-0.551754	-0.185936	-0.370258	0.25735	0.0582001	0.239696	0.501486
AT5G12300	0.397105	-0.0233871	0.371318	-0.442707	0.12928	0.103492	-0.29004
AT4G19850	0.432657	0.293146	0.110652	0.670408	0.291469	-0.0305367	0.668732
AT5G49530	0.585395	0.0355039	-0.359811	-1.44733	0.498034	-0.447172	-0.984795
AT3G22100	-0.0830161	-0.328566	0.375831	-0.141393	0.00679453	0.465642	0.193967
AT4G09950	0.065103	-0.130314	0.20985	0.0567255	0.18112	0.325867	0.36816
AT1G30410	1.28941	0.454395	0.71713	-0.515141	0.533796	-0.0384815	-0.435741
AT2G40815	0.00128579	-0.434762	-0.418831	-0.673195	0.165997	-0.254119	-0.0724351
AT1G07615	0.227994	-0.22906	-0.786217	-1.63029	0.565473	-0.448738	-0.83576
AT2G01950	-0.421994	-0.671137	-0.351428	-0.944182	-0.184814	-0.114248	-0.457859
AT3G23290	-0.327476	-0.28644	-0.658005	-0.218322	0.155044	-0.175485	0.223162
AT2G14220	0.0812781	-0.247149	-0.3893	-1.00625	0.379423	-0.0911551	-0.379682
AT2G44255	-0.211034	-0.355619	-0.160291	-0.817559	-0.176332	-0.125589	-0.638273
AT2G48030	0.478802	0.674762	0.263414	-0.0145791	0.230254	0.0148662	-0.459087
AT4G10070	0.153553	-0.112862	-0.596985	-1.32186	0.50212	-0.248419	-0.706874
AT5G18475	-0.373824	-0.288115	-0.316993	-0.341005	-0.0463855	0.010445	-0.0992754
AT4G23590	5.92488	4.56826	5.28148	3.51303	-0.185406	-0.828808	-1.24064
AT3G17580	1.00802	0.66544	0.852672	1.1364	-0.52274	-0.678084	-0.0517847
AT1G77120	0.194337	-0.529319	-0.590362	-0.456692	0.154593	-0.630106	0.22722
AT2G30424	-1.73787	-0.671711	-0.21926	0.619446	-0.436077	1.08253	0.855081
AT1G75480	1.13735	-0.0154784	0.0360245	0.683837	0.165132	-0.936192	0.864447
AT4G18250	2.31165	2.85545	2.6621	3.50643	-0.096501	0.253949	0.554479
AT2G25320	0.15443	-0.367864	-0.487059	-2.17442	0.633465	-0.00802449	-1.17309
AT3G15357	0.207975	0.319646	1.22136	1.60047	-0.939259	0.0741226	0.341566
AT2G36770	2.04243	1.47919	2.16001	1.42617	0.168578	0.286153	0.115558
AT4G15820	-0.155024	-0.482093	-0.96258	-1.54464	0.670336	-0.13722	-0.392211
AT3G16020	1.52886	1.26413	-1.20713	-1.0496	1.00505	-1.73094	-1.30868
AT2G25640	-0.035783	-0.0713003	-0.557241	-1.06106	0.37555	-0.145907	-0.614211
AT4G33985	1.14858	0.926032	0.691406	0.992923	-0.0510281	-0.508199	0.0158631
AT3G27630	-1.41047	-0.821279	-0.662426	0.633963	-0.510457	0.237591	0.944786
AT2G21090	0.0875892	-0.149756	-0.413296	-0.841395	0.0906803	-0.410205	-0.600959
AT2G41820	-0.229766	-0.579881	-0.722973	-1.50051	0.227314	-0.265894	-0.693314
AT2G42510	-0.295414	-0.231753	-0.564588	-0.479948	0.312752	0.0435781	0.0645576
AT5G09790	-0.208163	0.0168363	-0.847809	-0.48262	0.31754	-0.322106	-0.181917
AT5G01640	0.592453	0.486232	0.780792	0.582165	-0.226307	-0.0379684	-0.130374
AT4G26960	-1.10282	0.0797569	-0.297844	0.721001	-0.319781	0.485195	0.321463
AT5G56890	-0.199554	-0.490491	-0.535413	-1.42337	0.352256	0.016397	-0.580622
AT4G22680	2.48701	1.07334	2.85915	1.69118	-0.0693222	0.302824	0.548519
AT1G54200	-0.43386	-0.370036	-0.331084	-0.786558	0.107776	0.210552	-0.308746
AT1G17190	-1.16012	-0.323924	-0.743988	0.208215	-0.224569	0.191567	0.307569
AT3G03060	-0.363704	-0.224565	-0.321033	-0.68287	-0.103883	-0.0612128	-0.562189
AT1G08410	0.678122	-0.376984	-0.490473	-1.4421	0.805945	-0.36265	-0.259167
AT5G38690	-0.368583	-0.820808	-0.606797	-1.13622	0.521454	0.283241	0.206043
AT1G16690	0.0872076	-0.304769	-0.44417	-0.950946	0.281411	-0.249966	-0.364765
AT5G08550	0.0814528	-0.540121	-0.421054	-1.81631	0.366929	-0.135579	-0.909256
AT3G23010	0.659841	0.464062	1.17829	0.699189	0.351363	0.869811	0.58649
AT2G21080	-0.541838	-0.1131	-0.453339	-0.136364	0.168144	0.256642	0.144879
AT4G12770	0.425088	-0.317783	-0.376827	-1.72165	0.551509	-0.250406	-0.852359
AT2G34090	0.774316	0.762513	0.374784	0.821091	0.0910179	-0.308514	0.149596
AT5G10605	0.00382651	-0.0475075	0.290542	-0.20095	-0.0663113	0.220404	-0.219754
AT3G21950	-1.94576	-0.569178	-1.28053	-0.95514	0.365126	1.03036	-0.0208358
AT1G56520	-0.491099	-0.321435	-0.503946	-0.826549	0.23071	0.217863	-0.274404
AT5G07740	0.444437	0.0288257	-0.441639	-1.50612	0.72724	-0.158836	-0.807701
AT5G61920	-0.193797	-0.339498	-0.0506335	-0.540557	0.255072	0.398235	0.0540124
AT3G01370	-0.117016	-0.510205	-0.741773	-2.3033	0.637921	0.0131637	-1.15517
AT5G02250	-0.186502	-0.368662	-0.79227	-1.96545	0.618217	0.0124489	-0.978566
AT3G13857	0.368126	1.25483	1.16674	0.874524	-0.131565	0.667045	-0.511874
AT1G16820	-0.463446	-0.249555	-0.818386	0.121839	0.3099	-0.0450401	0.681294
AT3G20480	-0.222853	0.189105	-0.462697	0.123941	0.271663	0.0318198	0.206499
AT4G18970	-1.96865	-1.00943	-1.84778	-1.47344	0.429236	0.550105	-0.0347748
AT3G13782	1.37144	0.742277	1.23745	0.712581	0.143252	0.00925788	0.113556
AT1G16270	0.318649	-0.391886	-0.599128	-1.59683	0.681284	-0.236493	-0.523658
AT4G21400	0.771524	0.0901806	0.113026	-0.442987	0.564254	-0.0942437	0.0310869
AT1G21695	0.328983	0.107574	0.485479	0.712083	-0.670039	-0.513542	-0.0655295
AT1G15080	-0.210772	-0.12485	-0.127626	0.227025	-0.151875	-0.0687285	0.2
AT1G61210	-0.0262291	-0.213607	-0.395182	-1.49015	0.673403	0.30445	-0.603136
AT5G22450	0.656127	-0.374081	-0.545674	-2.49187	1.15506	-0.0467368	-0.962723
AT1G28350	0.448967	-0.657438	-0.669932	-1.71993	0.561479	-0.55742	-0.501012
AT2G33060	-0.166707	-0.774965	-0.736906	-1.29432	0.342399	-0.227801	-0.176956
AT5G50390	-0.111675	-0.219565	-0.630889	-0.758569	0.293451	-0.225763	-0.245553
AT5G42010	0.693132	0.380674	0.351533	0.0287455	0.122024	-0.219575	-0.229904
AT1G34260	0.44162	-0.455167	-0.42984	-2.06479	0.843809	-0.0276508	-0.765816
AT4G18375	-0.153507	-0.230589	-0.393496	-0.305691	0.310245	0.0702563	0.235143
AT1G12672	-0.827551	-0.262065	-0.254774	0.644553	0.0649541	0.637732	0.971572
AT5G16080	1.97549	1.1036	0.86545	0.730349	-0.347346	-1.45739	-0.7206
ATCG00360	-0.248006	-0.535404	0.0957365	0.120155	-0.0265366	0.317205	0.629022
AT2G47240	0.371152	-0.736855	-0.33554	-1.38978	0.492541	-0.214152	-0.160389
AT2G35710	0.851566	1.30932	0.117223	0.469879	0.484493	-0.24985	-0.354949
AT4G21410	0.234126	-0.422348	-0.356531	-1.24165	0.501011	-0.0896459	-0.318294
AT1G05750	0.0232235	-0.0682761	-0.0949066	-0.408322	0.1323	0.01417	-0.207746
AT5G01380	5.69059	4.83182	2.26117	0.719595	3.07199	-0.35743	-1.04024
AT3G01610	0.175715	-0.300482	-0.613277	-1.68828	0.565223	-0.223768	-0.822576
AT2G25420	-0.088951	-0.22462	-0.221405	-0.21043	0.0644615	-0.0679929	0.0786515
AT1G08620	0.506784	-0.455794	-0.424731	-2.15751	0.839747	-0.091768	-0.861968
AT5G07030	0.737521	0.600708	1.23662	0.508374	-0.421099	0.0780009	-0.513434
AT1G27595	0.0330643	-0.417619	-0.6817	-1.4079	0.491445	-0.223319	-0.498836
AT5G24080	2.23492	-0.0757708	2.18843	0.518771	-0.811518	-0.858007	-0.216977
AT1G18190	0.218461	-0.427377	-0.547706	-1.36006	0.681892	-0.0842751	-0.250796
AT3G20865	-0.784828	-0.122612	-0.450696	0.5679	0.122974	0.457105	0.813486
AT1G18250	0.642319	0.0713065	1.26619	0.974266	-0.51477	0.1091	0.38819
AT5G38610	-0.251042	0.217185	0.214592	0.81055	-0.35939	0.106244	0.233976
AT4G15975	1.13781	1.36885	1.46584	1.40992	0.0331993	0.361231	0.0742673
AT5G50780	0.826745	-0.324798	-0.227758	-1.78421	0.770091	-0.284412	-0.689318
AT5G45000	2.63641	2.29646	2.80023	2.05811	0.321189	0.485007	0.0828341
AT5G20980	-0.253222	-0.438653	-0.594704	-0.860335	0.384325	0.0428427	-0.0373569
AT3G26560	0.373613	-0.751661	-0.724559	-2.46894	0.95777	-0.140401	-0.759508
AT2G30945	0.180915	0.391314	0.408163	1.03059	-0.236169	-0.00892138	0.403107
AT1G02990	0.69336	-0.318392	-0.592119	-1.82677	1.03742	-0.248056	-0.47096
AT5G62280	-0.9701	-0.556864	-0.890526	-1.3766	1.2139	1.29347	0.39416
AT1G68810	-0.784745	-0.548835	-0.674524	-0.858025	0.164228	0.274449	-0.144961
AT4G16400	-0.333737	1.04221	-1.2211	-0.0492132	0.356346	-0.531013	-0.735082
AT2G39240	-0.398011	-0.696438	-0.208943	-0.145521	-0.673366	-0.484299	-0.12245
AT5G42920	0.415571	-0.586327	-0.700627	-1.93624	0.794632	-0.321566	-0.555282
AT1G01780	-0.225816	-0.586928	-0.714326	-0.880979	0.133795	-0.354714	-0.160255
AT2G13970	0.369765	-0.201897	-0.642146	-1.57136	0.950827	-0.0610837	-0.418638
AT4G15090	0.0953341	-0.518967	-0.740595	-1.82297	0.584983	-0.250946	-0.71902
AT2G35540	0.377948	0.0561789	-0.0208355	-0.708173	0.323589	-0.0751946	-0.440763
AT5G13460	-0.0556236	-0.695778	-0.935776	-1.90584	0.686825	-0.193328	-0.523233
AT1G64450	0.197348	0.109511	0.044331	-0.322638	-0.381952	-0.53497	-0.814101
AT3G44940	-0.821448	-0.48604	-0.573886	-0.0108148	-0.331941	-0.0843786	0.143284
AT1G16830	0.0138037	0.403575	-0.270525	0.0240126	0.245162	-0.0391659	-0.1344
AT4G16340	-0.0760264	-0.524081	-0.704473	-1.60098	0.511328	-0.117118	-0.565567
AT4G18300	0.228835	-0.3809	-0.348832	-0.995876	0.42422	-0.153447	-0.190756
AT1G79700	0.241941	0.270243	-0.843505	-0.229094	0.367768	-0.717678	-0.13157
AT4G11530	-0.00340886	-0.0541627	0.0846953	-0.0289198	0.176155	0.264259	0.201398
AT3G21560	-0.0699512	-0.019755	-0.2446	-0.581154	0.099761	-0.0748882	-0.461638
AT5G17460	0.437068	0.256708	0.858912	0.687514	-0.0829135	0.338931	0.347893
AT4G04190	0.15535	0.198027	0.796014	1.05154	-0.455741	0.184923	0.397768
AT1G78580	-0.279862	-0.908192	-0.850669	-2.32164	0.498715	-0.0720915	-0.914733
AT5G37570	0.289782	0.338356	0.0113522	0.418143	0.10619	-0.172239	0.185977
AT2G39580	0.272526	-0.34857	-0.335108	-0.992583	0.490276	-0.117358	-0.153737
AT3G29680	0.157662	-0.228028	-0.292684	-0.407501	0.0219726	-0.428374	-0.1575
AT5G16210	0.555986	-0.161824	-0.217476	-1.59605	0.599049	-0.174413	-0.835182
AT3G63070	0.461085	-0.392327	-0.602436	-2.30237	0.926959	-0.136561	-0.983081
AT1G22250	-0.301135	0.337595	-0.503662	0.024955	0.504548	0.302022	0.191909
AT1G74170	0.25338	-0.0667919	-0.048436	-0.163729	0.198531	-0.103285	0.101593
AT1G12480	0.0447349	-0.402551	-0.107151	-0.993684	0.120322	-0.0315637	-0.470811
AT1G67328	0.18754	0.328918	0.455025	0.416281	-0.226277	0.0412076	-0.138913
AT4G21500	-0.509465	0.0258035	-0.668295	0.230582	0.309799	0.150968	0.514577
AT3G55390	0.528448	1.01499	0.503969	1.05577	-0.147939	-0.172418	-0.107153
AT1G58160	-0.621955	0.0889068	-0.158895	0.578037	-0.0689395	0.394121	0.420191
AT3G52790	2.64055	0.0557162	20.7858	19.7744	-20.7802	-1.62898	-0.0555159
AT1G38131	-0.426263	-0.430119	-0.376653	-0.659558	0.0533261	0.102936	-0.176113
AT3G13380	1.35103	0.424082	0.819999	-0.320605	-0.108583	-0.639616	-0.85327
AT5G35753	0.379825	-0.33635	-0.707714	-1.64759	0.745253	-0.342286	-0.565986
AT5G09530	1.54482	-0.288955	0.688569	-0.362822	-0.574365	-1.43062	-0.648231
AT3G11850	0.125849	-0.17044	0.0025617	-0.733209	0.508398	0.385111	-0.0543708
AT5G61040	-0.178611	-0.741137	-0.653528	-1.28715	0.457153	-0.0177641	-0.088856
AT3G63440	-0.327481	-0.483276	-0.987392	-0.858291	0.412831	-0.247079	0.0378169
AT1G23200	0.170068	-0.164535	0.741084	-0.30241	-0.350195	0.220821	-0.48807
AT4G25270	-0.399961	-0.446338	-0.89015	-1.4661	0.426898	-0.0632909	-0.592864
AT5G54200	-0.457018	-0.499124	-0.689704	-1.28754	0.458954	0.226268	-0.329466
AT5G06690	-1.31821	-0.881982	-0.721705	-0.17524	0.218111	0.814617	0.924853
AT4G34160	-0.017909	-0.0545679	0.357497	-0.417959	-0.314981	0.0604249	-0.678372
AT4G12680	0.186586	-0.0488736	-0.630404	-0.836771	0.369415	-0.447574	-0.418482
AT2G47020	0.0378312	-0.220587	-0.232169	-1.18952	0.382343	0.112342	-0.586588
AT1G68400	-0.563655	-0.365776	-0.592925	-1.21124	0.0782154	0.0489451	-0.767252
AT1G35515	0.878202	-0.506745	-0.321556	0.555004	0.105247	-1.09451	1.167
AT5G20225	-0.488837	0.0109519	-0.349972	-0.147974	0.510319	0.649184	0.351393
AT1G23060	2.15761	1.43888	0.862886	-0.436445	0.682391	-0.612337	-1.19294
AT5G46100	-0.353508	-0.204613	-0.210086	-0.331042	0.442574	0.585996	0.316145
AT4G34410	5.63146	3.10619	2.59583	0.593445	2.23916	-0.796469	-0.273589
AT5G64000	1.68912	1.37589	1.56972	1.48187	-0.41616	-0.53557	-0.310189
AT5G61350	-1.3434	-0.971119	-1.00484	-1.03697	0.0685809	0.407138	0.00273276
AT4G02760	0.188784	-0.0203926	0.00130982	-0.0715012	-0.0383929	-0.225867	-0.0895015
AT2G32340	0.0613478	-0.100954	-0.805379	-0.962826	0.724669	-0.142058	-0.137204
AT5G02860	-0.108218	-0.293162	-0.390035	-0.152515	0.236034	-0.0457825	0.376682
AT5G47130	0.767518	0.0710026	1.11528	1.18477	-0.806722	-0.458963	0.307048
AT3G06010	0.0544996	-0.550862	-0.3139	-2.49106	0.58369	0.21529	-1.35651
AT1G53440	0.766101	-0.495811	-0.876458	-2.02334	1.10501	-0.537548	-0.422513
AT2G24960	0.0722912	-0.184822	-0.249486	-0.516647	0.549856	0.228079	0.218031
AT1G23470	0.424226	-0.0271599	-0.536039	0.113365	0.217239	-0.743026	0.357765
AT1G06980	-1.39705	-0.4471	-0.618208	0.127394	-0.940121	-0.161279	-0.365627
AT1G02360	0.0564856	0.352929	-0.338509	-0.138191	0.592134	0.197139	0.101014
AT2G48110	0.354705	0.0255838	-0.251083	-1.24744	0.572338	-0.0334503	-0.700688
AT2G25470	3.09499	1.79872	3.26682	2.1109	-0.0922564	0.0795796	0.219924
AT2G32000	0.00715122	-0.266219	-0.632911	-1.59999	0.583653	-0.0564093	-0.750118
AT2G41130	-0.177769	-0.275826	0.423968	-0.346064	-0.171395	0.430343	-0.241633
AT1G13970	0.504513	-0.103691	-0.0380645	0.0749411	0.207747	-0.33483	0.38638
AT2G33847	0.783911	1.71113	0.561843	1.33271	0.0478889	-0.174178	-0.330538
AT1G24764	0.300881	-0.540241	-0.580882	-2.10166	0.397106	-0.484658	-1.16431
AT2G01890	-1.51841	-0.717699	-1.02921	-1.03122	0.416604	0.905799	0.103082
AT2G18330	0.13609	-0.450099	-0.588967	-1.87749	0.479074	-0.245983	-0.948316
AT3G54750	-0.718683	-0.559986	-0.620144	-0.835471	-0.166474	-0.067935	-0.44196
AT5G02260	0.700122	0.0494096	1.51919	1.59956	-0.789108	0.0299564	0.761045
AT1G75290	1.35442	0.464692	0.674531	-0.150487	0.31349	-0.366401	-0.301689
AT4G23410	0.133669	0.141691	0.0687863	0.12734	0.126195	0.061312	0.111844
AT4G38660	-1.11055	-0.348913	-0.670672	0.0510746	-0.220001	0.219879	0.179987
AT4G05091	1.21951	-0.0476381	-20.6033	-20.6033	0.37188	-22.4569	-21.1897
AT2G28260	-0.112801	-0.33905	-0.656906	-0.819393	0.287352	-0.256753	-0.192992
AT3G48600	-0.417385	0.213387	-0.052159	0.25078	0.0483371	0.413563	0.0857301
AT3G62050	-0.723926	0.128578	-0.00773825	0.903568	-0.251618	0.46457	0.523372
AT3G02110	-1.23973	-0.338172	-1.02437	-0.957286	0.250158	0.465517	-0.368956
AT3G12020	0.327941	-0.817993	-0.698326	-1.80188	0.849996	-0.17627	-0.133895
AT1G77030	0.315579	-0.594832	-1.00799	-2.09405	0.991356	-0.332217	-0.507861
AT3G61690	0.274315	-0.391358	-0.273007	-1.36894	0.418147	-0.129174	-0.559432
AT5G35750	-0.358761	-0.706541	-0.915638	-1.83858	0.686481	0.129604	-0.445563
AT4G02482	0.361138	-0.177666	-0.806604	-0.968558	0.283259	-0.884484	-0.507634
AT2G34650	-0.173963	-0.151491	0.00832929	0.0371574	-0.0988054	0.0834866	0.0898429
AT3G15750	-0.103628	-0.274653	0.109268	0.264394	-0.000664645	0.212231	0.538383
AT5G16490	-0.270018	0.0779324	-0.0424802	0.447843	-0.384525	-0.156987	-0.014614
AT1G22170	-0.307819	-0.0593457	-0.364166	0.369192	0.0127891	-0.043558	0.441327
AT2G44450	5.32287	3.37021	4.45501	2.56971	-0.0206944	-0.888554	-0.821186
AT1G51520	0.361152	-0.00710943	-0.0448376	-0.667628	-0.0142819	-0.420271	-0.674801
AT5G35935	-1.47998	-5.47625	-0.602395	-1.34838	0.499883	1.37747	4.62775
AT4G00060	0.153349	-0.309022	-0.477934	-1.26729	0.492088	-0.139195	-0.466175
AT1G74890	-2.55085	-0.710833	-1.13136	0.466214	0.112347	1.53184	1.28939
AT3G48640	1.84089	1.96593	1.98239	1.9718	0.584428	0.725925	0.590304
AT1G62914	-0.303042	-0.309001	-0.082948	-0.233679	0.229169	0.449263	0.304491
AT3G27200	0.00434544	0.077281	0.398368	0.816668	-0.620595	-0.226572	0.118792
AT5G14840	-0.20676	0.0855003	0.100079	0.659389	-0.195865	0.110974	0.378024
AT2G03590	0.463146	0.347201	0.583503	0.156218	-0.0579058	0.0624508	-0.248889
AT3G12220	3.11346	3.07267	4.16039	3.58292	-0.363085	0.683841	0.147167
AT3G18240	0.20338	-0.102784	-0.66263	-1.13267	0.495191	-0.37082	-0.534699
AT1G76620	-0.991207	-0.230616	-0.901302	0.390859	-0.0443142	0.0455912	0.577161
AT3G49660	0.32338	-0.0477361	-0.235504	-0.575149	0.332039	-0.226845	-0.195373
AT1G53200	0.177646	-0.633744	-0.333199	-1.40388	0.480774	-0.0300712	-0.289367
AT3G60120	8.01445	8.53081	22.3566	21.4009	-15.272	0.0761335	-1.39591
AT2G18220	0.39752	-0.48386	-0.684495	-1.89816	0.715417	-0.366598	-0.698883
AT3G01960	-0.668689	0.0298981	0.0506956	-0.457045	-0.0744102	0.644974	-0.561353
AT1G01670	0.372116	0.23265	-0.0314371	-0.374573	0.235038	-0.168515	-0.372186
AT5G55250	-1.11052	-0.750875	-0.871944	-0.323404	-0.299584	-0.0610095	0.127887
AT5G61000	-0.686719	-0.245562	-0.493118	-0.26653	-0.220146	-0.0265446	-0.241114
AT1G58210	-0.244938	0.0196943	-0.292699	0.200681	0.375863	0.328102	0.55685
AT1G09060	0.417992	-0.467871	-0.52021	-2.2634	0.81786	-0.120341	-0.977673
AT1G22550	0.933901	0.705372	1.21745	0.269764	-0.866421	-0.582877	-1.30203
AT1G18690	0.292526	0.43184	0.0478695	0.395747	0.184751	-0.0599054	0.148658
AT3G50650	0.600333	0.397495	0.24097	-0.380611	0.464771	0.105408	-0.313335
AT5G61480	0.0347352	-0.518401	-0.0477761	-1.21209	-0.112492	-0.195003	-0.806177
AT4G11000	1.16033	1.37388	0.975858	0.848617	0.502528	0.318058	-0.0227332
AT1G70710	1.27847	0.880087	0.169206	-0.75626	0.214409	-0.894858	-1.42194
AT5G42830	1.69314	1.54965	1.28431	0.737467	1.00623	0.597403	0.194044
AT1G71060	0.107985	0.174078	0.243581	0.73062	-0.0354131	0.100182	0.521129
AT2G35480	-0.482015	-0.405436	-0.540995	-0.265103	-0.131776	-0.190756	0.00855715
AT1G55040	0.245553	-0.0217767	-0.473431	-1.33755	0.534069	-0.184915	-0.7817
AT1G67000	2.97338	1.85948	2.27831	1.09423	0.237648	-0.457425	-0.5276
AT3G20040	0.0529175	0.0197214	-0.500026	-0.813336	0.578629	0.0256855	-0.254428
AT1G16090	0.366623	0.0199231	-0.101177	-0.443808	0.428922	-0.0388781	-0.0348094
AT3G58430	-0.365394	-0.116677	-0.157262	0.257731	-0.134341	0.0737914	0.240068
AT3G16890	0.134687	-0.375808	-0.494446	-0.836876	0.0334318	-0.595701	-0.427637
AT5G09800	0.867939	1.02065	0.0753012	0.329381	0.287257	-0.505381	-0.404016
AT3G12870	0.676299	1.16901	2.06296	2.41375	-1.16295	0.223708	0.081792
AT4G09840	0.234351	0.450774	0.469261	0.365268	0.115353	0.350263	0.0298476
AT3G17340	0.131258	-0.343974	-0.310821	-1.26937	0.500147	0.0580672	-0.425245
AT5G46295	1.52297	1.72294	2.06611	1.85764	0.267313	0.810458	0.402012
AT2G21380	0.0484273	-0.748614	-0.852196	-2.58453	0.806315	-0.0943082	-1.0296
AT5G06230	1.64482	0.234186	0.982107	0.213521	0.156442	-0.506275	0.135778
AT5G51200	-0.181301	-0.492488	-0.886852	-1.57669	0.691978	-0.0135732	-0.392224
AT5G19090	-1.12381	-0.538389	-1.23292	-0.90183	0.437371	0.328257	0.0739307
AT1G19370	0.108023	-0.220441	-0.496774	-0.827458	0.520486	-0.0843112	-0.0865316
AT3G02040	0.722333	0.338639	-0.0872345	-0.616844	0.786742	-0.0228257	-0.168741
AT2G45245	-0.0396021	0.45172	-0.323669	0.418658	0.3257	0.0416323	0.292637
AT4G28280	1.08217	0.565904	0.63623	0.550794	0.751932	0.305995	0.736822
AT1G03470	-0.355741	-0.68058	-0.622181	-0.868051	0.436986	0.170546	0.249515
AT1G07780	-0.56188	-0.236109	-0.284231	0.188301	-0.278818	-0.00116918	0.145591
AT4G04970	0.219557	-0.0400027	-0.380949	-0.929857	0.539252	-0.0612544	-0.350602
AT4G13000	2.00449	1.38997	1.36031	0.779274	0.283689	-0.360492	-0.327002
AT1G04540	0.521249	0.568574	0.0310698	-0.279335	-0.340714	-0.830893	-1.18862
AT2G31340	-0.281147	-0.412821	-0.603094	-1.01491	0.350035	0.0280885	-0.252049
AT1G55325	0.345031	-0.335205	-0.414175	-1.62299	0.664717	-0.0944892	-0.623068
AT3G56730	-0.497691	-0.35208	-0.0548384	0.491475	-0.424931	0.0179217	0.418624
AT1G11710	-0.218979	-0.183891	-0.42235	-0.372391	0.269581	0.0662091	0.0810808
AT5G60408	-0.835788	0.604778	0.597257	-0.783413	-0.0798071	1.35324	-1.468
AT3G04170	22.7645	20.8851	20.9817	19.6644	0	-0.776781	-1.22077
AT5G60910	0.316994	0.38124	0.279088	0.315781	0.14962	0.111714	0.0841605
AT4G13030	0.599542	-0.0411942	-0.221377	-0.661848	0.456112	-0.364807	-0.164542
AT3G06210	0.51238	-0.200794	-0.437255	-1.49622	0.602594	-0.34704	-0.692834
AT1G03905	1.29781	0.366084	0.967862	0.879495	-0.0709861	-0.40093	0.442424
AT1G60545	0.550264	-0.052946	-0.0765789	-0.781013	0.133848	-0.492995	-0.594219
AT1G66730	-0.134596	-0.453518	-0.561767	-1.10307	0.376944	-0.0502264	-0.272609
AT3G07060	-0.0364389	-0.107958	-0.201816	-0.173367	0.174064	0.00868688	0.108655
AT4G24480	0.359199	-0.146773	0.00819299	-1.32673	0.321573	-0.0294321	-0.858386
AT3G19670	0.306831	-0.641058	-0.56104	-1.71067	0.745682	-0.122189	-0.323926
AT1G21160	0.0172678	-0.422062	-0.690201	-1.345	0.771622	0.0641534	-0.151319
AT2G36570	0.13716	-0.162615	0.243585	-0.264736	-0.257891	-0.151467	-0.360012
AT1G49840	-0.622592	-0.40628	-0.570984	-0.372992	0.297672	0.349281	0.33096
AT5G66630	1.50043	0.954325	0.670448	-0.659657	-0.257998	-1.08798	-1.87198
AT1G62830	0.0511645	-0.518383	-0.462094	-1.45388	0.426399	-0.0868594	-0.5091
AT2G40113	4.11461	2.80954	2.3867	2.14294	0.529879	-1.19803	-0.136715
AT2G24690	0.13983	-0.640439	-0.532266	-1.43192	0.606881	-0.0652153	-0.184598
AT3G59765	-0.015645	-0.268937	1.19735	1.4217	-1.07395	0.139043	0.616692
AT4G23040	0.236083	-0.161165	0.111702	-0.605881	0.230936	0.106555	-0.21378
AT1G72855	0.329087	-0.104291	-0.191952	-0.550061	0.0156207	-0.505419	-0.43015
AT2G04270	-0.235543	-0.716093	-0.839926	-1.80306	0.669817	0.0654338	-0.417149
AT1G33720	-0.40795	-0.423975	-0.42171	-0.624338	0.149915	0.136155	-0.0504481
AT4G10310	-0.783843	-0.467011	-0.802809	-0.728686	0.087696	0.0687299	-0.173979
AT3G48580	1.19606	1.10943	0.450572	-0.0709205	0.238209	-0.50728	-0.942141
AT5G13880	0.0566351	-0.147282	0.195624	0.267025	-0.277944	-0.138955	0.136363
AT5G46680	0.27662	0.281746	0.456468	0.561368	-0.0900618	0.0897862	0.18956
AT5G39980	-0.565979	-0.591587	-0.416627	-0.460249	0.0925614	0.241913	0.2239
AT5G53430	0.421771	-0.456738	-0.540142	-1.4706	0.677482	-0.284432	-0.336377
AT2G41150	0.54428	0.221214	-0.12438	-0.161657	0.54988	-0.118781	0.167009
AT3G14330	-0.707266	-0.79896	-1.1743	-1.62782	0.376499	-0.0905304	-0.452365
AT4G04350	-0.233765	-0.693188	-0.81555	-1.38737	0.704742	0.122957	0.0105619
AT1G30220	0.977133	0.225347	1.02459	1.21168	-0.842041	-0.794583	0.144289
AT2G20300	-0.316119	-0.513545	-0.703273	-1.63588	0.33474	-0.0524137	-0.787591
AT4G31400	-0.719048	-0.378512	-0.281199	0.0684516	-0.00919257	0.428656	0.437771
AT4G14510	-0.0184067	-0.656076	-1.02463	-1.77198	0.806566	-0.199661	-0.309334
AT3G11950	0.291814	-0.238929	-0.140901	-0.96159	0.442874	0.0101588	-0.279787
AT4G10550	-0.0266813	-0.20582	-0.624926	-0.897287	0.263559	-0.334686	-0.427909
AT2G22450	0.989147	0.2452	-0.691597	-1.06367	0.620044	-1.0607	-0.688831
AT3G61570	0.414363	-0.644892	-0.314612	-1.31594	0.561795	-0.16718	-0.10925
AT1G03090	0.327916	-0.457103	-0.426286	-1.53273	0.591752	-0.16245	-0.483878
AT3G03350	-0.21124	-0.427059	-0.566655	-1.10204	0.36258	0.00716433	-0.312398
AT4G32450	-0.224932	-0.37836	-0.661262	-0.741125	0.351519	-0.0848112	-0.0112464
AT1G02010	-0.0260318	-0.536576	-0.720968	-1.29695	0.478029	-0.216907	-0.282341
AT5G39500	0.549334	-0.50126	-0.53604	-1.6288	0.72424	-0.361133	-0.403305
AT1G32090	-0.0852005	-0.509015	-0.441358	-0.833173	-0.0234392	-0.379597	-0.347598
AT1G05730	0.382704	0.293497	0.607167	0.634851	-0.201487	0.0229762	0.139867
AT1G62760	0.945457	0.127384	0.100077	0.215504	0.693152	-0.152228	0.781273
AT5G13900	2.69132	1.2555	3.53741	2.29691	-1.7414	-0.895316	-0.699993
AT2G26890	0.414579	-0.316005	-0.453187	-2.1592	0.870088	0.00232102	-0.973112
AT3G60966	3.54903	2.79448	3.80452	3.70347	-0.262137	-0.00665382	0.646857
AT1G65481	3.25949	2.2033	5.12554	4.58285	-1.33966	0.526395	1.03988
AT1G67510	0.190488	0.169724	0.0748688	0.171572	-0.0767241	-0.192343	-0.0748765
AT1G18485	-0.530634	-0.56354	-0.622827	-1.02632	0.536967	0.444774	0.074184
AT1G30550	0.140401	0.223937	0.284905	0.706433	-0.0899634	0.0545406	0.392532
AT1G80450	2.43917	0.953083	2.37205	1.11705	-0.0242888	-0.0914122	0.139679
AT1G80325	-0.366501	-0.0969851	-0.499275	-0.242066	-0.0279057	-0.16068	-0.172987
AT3G56690	0.322727	-0.469459	-0.565685	-1.75477	0.537456	-0.350956	-0.747859
AT1G25320	1.09139	0.651078	0.856992	0.505324	-0.059129	-0.293529	-0.204883
AT2G29490	2.26461	1.59275	1.32132	0.893009	0.39261	-0.550686	-0.307129
AT2G27760	0.0376585	-0.233654	-0.492789	-0.882048	0.46688	-0.0635675	-0.181514
AT1G49320	-0.803349	-0.432565	-0.602674	0.0850079	0.0102535	0.210928	0.527826
AT3G22945	0.338807	-0.571461	0.758338	0.045495	-1.01444	-0.594908	-0.397483
AT5G64030	0.000743486	-0.746136	-0.979607	-1.7362	0.737385	-0.242965	-0.252683
AT1G12080	-2.80191	-1.50589	-2.19779	-0.483867	0.233775	0.837895	1.2558
AT5G10820	0.520113	0.245279	-0.150861	-0.305218	0.338688	-0.332287	-0.211809
AT1G49340	0.16988	-0.268062	-0.535032	-1.84812	0.636706	-0.0682061	-0.943353
AT4G37400	0.149975	-0.319015	-0.179924	-0.321989	-0.194	-0.523898	-0.196974
AT1G80020	0.573458	-0.290484	-0.475273	-2.33184	0.783641	-0.265091	-1.25771
AT2G11140	-0.23876	-0.267419	0.0425003	-0.130709	-0.040266	0.240994	0.0964445
AT1G77145	-0.203372	0.430479	-0.379906	0.245483	0.261402	0.0848679	0.076406
AT5G46330	0.82644	-0.0790452	-0.448591	-1.51606	0.7457	-0.529331	-0.691319
AT3G55910	1.79606	0.103415	0.419436	0.313993	0.221433	-1.15519	0.432012
AT1G77250	-0.0699573	-0.219724	-0.562405	-0.907589	0.508099	0.0156514	-0.179766
AT3G18710	-1.16361	-0.497367	-1.18522	-0.535791	0.0984025	0.07679	0.0599786
AT4G12240	0.104237	-0.0997828	-0.469988	-0.763644	0.790257	0.216032	0.126396
AT5G01595	-0.31811	0.0988956	-0.0146678	0.321978	-0.226441	0.0770014	-0.00335831
AT2G48140	2.92924	2.1434	21.2695	20.2901	-20.309	-0.962718	-1.15633
AT1G79350	0.0784419	-0.147611	-0.67451	-1.22019	0.522111	-0.230841	-0.550465
AT1G05830	0.117718	-0.363105	-0.521089	-1.61109	0.663348	0.0245412	-0.584632
AT1G49720	0.257167	-0.288516	-0.0371151	-0.212552	0.0979925	-0.19629	0.173957
AT1G05320	-0.282908	-0.807784	-0.581157	-1.30978	0.651589	0.35334	0.149597
AT1G74310	0.561829	-0.341207	-0.906431	-2.09957	0.894096	-0.574164	-0.864268
AT1G08290	1.6306	0.776265	1.10546	0.882029	0.10309	-0.42205	0.208854
AT2G31180	4.97218	3.58794	22.3146	20.9599	-18.5918	-0.243436	-0.213869
AT5G58580	-0.176037	0.129539	0.203098	0.688916	-0.184889	0.194246	0.374489
AT5G11310	0.251474	-0.421367	-0.681034	-1.25035	0.350433	-0.582075	-0.478555
AT4G34310	0.499133	-0.0806321	-0.14568	-1.36673	0.52479	-0.120023	-0.761306
AT1G72410	0.067028	-0.505209	-0.75659	-2.07571	0.713909	-0.10971	-0.856595
AT1G12620	-0.198076	-0.268658	-0.336409	-0.492805	-0.00935691	-0.14769	-0.233504
AT4G13970	0.111554	-0.488552	-0.576591	-1.28866	0.555322	-0.132823	-0.244785
AT3G54100	0.891562	0.0118602	-0.0415022	-1.27412	0.724036	-0.209028	-0.561945
AT3G10490	0.303241	-0.164837	-0.478138	-2.04303	0.810019	0.0286403	-1.06817
AT5G44750	0.166216	-0.557071	-0.786733	-1.86462	0.792655	-0.160293	-0.514897
AT3G63510	-0.877418	-0.68123	-0.568051	-0.483027	-0.174582	0.134785	0.0236208
AT3G19370	-0.155723	-0.745447	-0.691933	-1.73857	0.738117	0.201907	-0.255004
AT5G41790	0.128194	-0.290254	-0.552396	-0.654414	0.540164	-0.140426	0.176004
AT5G52630	-0.00184182	-0.11168	-0.243775	-0.320126	0.376897	0.134964	0.168451
AT1G51790	2.86034	1.89914	2.56079	1.11765	0.33455	0.0349996	-0.446944
AT4G33420	0.276898	0.0610274	-0.426123	0.356485	0.486304	-0.216717	0.781762
AT3G43430	0.216675	0.89212	0.697605	1.31427	0.0301941	0.511125	0.452346
AT5G51560	-0.590891	-0.532682	-0.572962	-0.856351	-0.0192332	-0.00130388	-0.342903
AT5G66460	0.853751	-0.202272	-0.250941	-1.27144	-0.00720055	-1.11189	-1.07636
AT3G27520	-0.439231	0.389943	-0.249012	0.5174	0.0617771	0.251996	0.189234
AT4G29850	2.50915	2.0171	2.44254	2.43865	-0.0517156	-0.118329	0.369831
AT1G17750	2.08543	0.923331	1.11734	-0.182478	0.388539	-0.57955	-0.717271
AT3G25710	-0.696525	-0.617157	-0.473525	-0.890704	0.102769	0.325769	-0.170778
ATCG00770	-1.31744	-0.499576	-1.48346	-1.24311	0.448345	0.282319	-0.29519
AT4G17180	-0.482542	-0.226937	-0.751168	-0.396084	0.0416866	-0.22694	-0.12746
AT4G12780	0.239746	-0.243492	-0.536008	-1.68869	0.682484	-0.0932698	-0.76271
AT4G13540	-0.320111	-0.667353	-0.280467	-0.960762	0.544313	0.583956	0.250904
AT3G43610	-0.246527	-0.389564	-0.554401	-1.15168	0.270814	-0.0370607	-0.491301
AT5G44490	-0.93715	-0.455919	-0.818096	-0.110055	0.0287857	0.14784	0.37465
AT1G79220	-0.512596	-0.204476	-0.331873	-0.274337	-0.0742956	0.106427	-0.144157
AT2G28410	-1.53151	-0.585935	-0.704113	-0.39156	0.0159196	0.843319	0.210295
AT3G48850	5.74539	4.9152	5.2758	5.77643	-0.647146	-1.11674	0.214088
AT4G30935	0.834024	-0.378901	-0.524076	-1.98553	0.680025	-0.678075	-0.926609
AT4G30230	1.03313	0.223966	0.234441	0.193741	0.246802	-0.551883	0.216577
AT5G19490	0.11732	0.151613	0.352087	0.202926	0.117493	0.35226	0.168806
AT3G60510	-0.537639	-0.365722	-0.472163	-0.264768	0.127342	0.192818	0.228296
AT3G59250	-1.30594	-0.725077	-1.01809	-0.1855	0.225845	0.513698	0.765422
AT3G44440	0.426566	-1.3603	-0.237328	0.0632224	0.0430268	-0.620868	1.46655
AT3G59410	0.240951	-0.287157	-0.508882	-1.07937	0.493286	-0.256547	-0.298923
AT3G55370	-0.2607	-0.527216	-0.293231	-0.348273	-0.152861	-0.185391	0.0260827
AT3G21600	0.552573	-0.236745	0.0930398	-1.30958	0.000964124	-0.458569	-1.07187
AT2G34357	0.451607	-0.584183	-0.72193	-2.49686	1.02583	-0.147706	-0.886841
ATCG00050	0.103034	-0.639812	-1.02608	0.414398	-0.282941	-1.41206	0.771269
AT3G56970	-1.62077	-0.24876	-1.77807	-1.34975	1.0257	0.868398	-0.0752896
AT4G35640	-0.413752	0.0859385	-0.693862	-0.276047	0.190393	-0.0897176	-0.171592
AT4G38330	-0.317766	0.0547205	-0.57737	-0.0681278	0.187296	-0.0723077	0.0644481
AT2G18969	1.28447	1.51593	-0.0879207	0.60224	0.051366	-1.32103	-0.862325
AT5G54720	-0.238559	0.373433	0.0913062	0.349475	0.41194	0.741806	0.387982
AT3G60610	0.0965152	-0.120573	-0.262056	-0.420951	-0.0276055	-0.386177	-0.327983
AT1G66940	-0.472397	0.175819	-0.849754	-0.45568	0.512059	0.134702	-0.11944
AT1G10330	-0.194356	0.0892187	-0.00607199	0.34669	-0.0709229	0.117361	0.186548
AT2G38380	3.67149	0.504676	6.57758	4.61584	-4.95921	-2.05312	-0.848044
AT4G19440	0.129685	-0.0746724	-0.169194	-0.570583	0.401468	0.102589	-0.094443
AT5G58510	0.599019	-0.246163	-0.28136	-1.58929	0.46383	-0.416549	-0.879298
AT3G06920	-0.15403	-0.334762	-0.341587	-0.966803	0.476035	0.288477	-0.156005
AT3G55340	0.192427	-0.45893	-0.749097	-1.4529	0.614611	-0.326913	-0.379359
AT3G20660	1.37766	0.903738	0.921681	0.333394	0.249206	-0.206772	-0.321138
AT4G23940	-0.381675	-0.685339	-0.915442	-2.28482	0.58857	0.0548024	-1.01091
AT2G33290	0.132191	-0.13441	-0.64819	-1.05813	0.53886	-0.241521	-0.384859
AT3G05730	0.243412	0.204374	0.132562	-0.658347	0.0621176	-0.0487327	-0.800604
AT5G49930	0.325261	-0.502556	-0.495943	-1.53039	0.774391	-0.0468134	-0.253438
AT1G51170	-0.506259	-0.318039	-0.231016	-0.71267	0.0661227	0.341365	-0.328508
AT5G03780	0.214113	-0.32608	-0.68752	-1.03481	0.663166	-0.238467	-0.0455603
AT1G62310	0.496172	-0.330834	-0.456578	-1.41529	0.870288	-0.0824633	-0.214163
AT2G29090	0.407453	-0.389874	0.258814	-0.289388	-0.0986698	-0.247309	0.00181671
AT1G05460	-0.0670629	-0.460909	-0.660812	-1.29584	0.460749	-0.133001	-0.374178
AT2G05995	-1.216	-0.469232	-1.06121	0.0820178	-0.131531	0.0232626	0.419719
AT5G35930	0.0401572	-0.23506	-0.431289	-0.664361	0.331397	-0.14005	-0.0979037
AT2G42200	-1.16563	-0.720744	-0.647525	-0.427008	0.0592977	0.577407	0.353034
AT1G14780	2.00689	0.804711	1.49991	-0.0835914	0.384509	-0.122477	-0.503793
AT5G03545	-1.11894	-0.356129	-1.4704	-0.408342	-0.531206	-0.882661	-0.583419
AT3G53232	2.07224	2.01071	1.33768	1.84406	0.608902	-0.125665	0.442251
AT4G30350	0.423954	-0.569192	-0.449492	-2.03601	0.47479	-0.398656	-0.992026
AT2G34640	-0.133777	-0.790218	-1.0835	-1.88666	0.765326	-0.184392	-0.33112
AT5G12450	1.02238	1.03196	-0.264499	1.01521	0.697863	-0.589014	0.681113
ATCG00750	-0.628706	-1.11367	-0.845922	-0.837975	0.234363	0.0171471	0.510061
AT3G43840	21.689	0	20.996	19.3048	0	0.312976	20.3108
AT1G10060	-0.289139	-0.32027	-0.354805	-0.453575	0.360766	0.2951	0.227461
AT4G03115	-0.116838	0.0509795	-0.354386	-0.269234	0.272697	0.0351492	-0.0475165
AT3G26460	0.796194	0.597199	0.244774	-0.124745	-0.0572076	-0.608628	-0.779152
AT4G21730	0.439219	0.187152	-0.0921897	0.357085	0.252214	-0.279195	0.422147
AT2G30420	-2.0054	-0.764441	-0.968903	-0.249645	0.165241	1.20174	0.680037
AT1G79170	-2.30564	-0.792637	-1.11256	-0.0796747	-0.510788	0.682298	0.202175
AT1G25450	-0.376428	0.602171	-1.06155	-0.679659	0.457348	-0.227772	-0.824482
AT4G23240	0.476036	0.295469	0.022371	-0.159379	0.186163	-0.267503	-0.268685
AT1G29160	1.55933	1.17276	1.939	2.42413	-0.681057	-0.301383	0.570308
AT3G48425	-0.403548	-0.382529	-0.864985	-0.592588	0.287338	-0.174099	0.0772786
AT5G49700	0.67491	0.21519	0.891483	1.60202	-0.177298	0.0392746	1.20953
AT3G53440	0.0929859	-0.362021	-0.363437	-0.893497	0.454527	-0.0018963	-0.0769494
AT5G66620	1.42941	1.01872	1.07732	0.0362631	-0.60593	-0.958022	-1.58839
AT1G67140	0.160945	-0.625112	-0.601902	-1.67339	0.622791	-0.140057	-0.425489
AT3G46370	-0.240749	-0.863374	-0.806025	-1.25026	0.56785	0.00257435	0.180966
AT4G22880	2.00486	1.93782	2.18783	2.93866	-0.797983	-0.615016	0.202865
AT5G59740	0.187953	-0.0647497	0.274694	0.229167	-0.357495	-0.270754	-0.0635777
AT4G26890	0.384835	0.53913	0.668818	0.576288	0.196399	0.480382	0.233557
AT4G04330	-1.39164	-0.536584	-0.380315	0.513419	-0.342005	0.669325	0.707998
AT2G25530	0.0564403	-0.416609	-0.156977	-0.749096	-0.00151068	-0.214928	-0.333997
AT5G18370	0.586246	-0.0903239	-0.068406	-1.3763	0.560736	-0.0939158	-0.72524
AT5G52410	0.880189	-0.339545	-0.051326	-1.78561	0.511684	-0.419831	-0.934377
AT5G07152	-0.140476	-0.0591925	-0.636076	-0.728793	0.321187	-0.174413	-0.348414
AT4G19890	0.15704	-0.0878342	-0.105205	-0.16606	0.165766	-0.09648	0.0875398
AT2G24165	0.251776	0.677466	1.10386	1.51697	-0.544549	0.307533	0.294953
AT1G12460	-0.905659	-0.215162	-0.658341	-0.36097	0.0228076	0.270126	-0.123
AT4G37580	-0.0529595	-0.264877	0.172239	-0.437131	0.109022	0.334221	-0.0632322
AT4G23700	3.43534	2.711	2.71404	2.16168	0.28675	-0.434544	-0.262579
AT5G20450	-0.395713	-0.141272	-0.290181	-0.130548	0.0324784	0.13801	0.0432026
AT1G49160	-0.32126	-0.426647	-0.768045	-0.933661	0.477661	0.0308762	-0.0293529
AT1G22870	0.386604	-0.239978	-0.347814	-2.05163	0.705413	-0.029005	-1.10624
AT5G11040	0.381934	-0.184585	-0.290372	-1.47251	0.410019	-0.262287	-0.877909
AT5G04460	0.298828	-0.408099	-0.50686	-1.38553	0.65322	-0.152468	-0.324207
AT4G30680	-0.77901	-0.272591	-0.650477	-0.355598	0.123394	0.251927	0.0403865
AT3G11590	0.534067	-0.208866	-0.430459	-1.61172	0.821888	-0.142638	-0.580963
AT1G76710	0.424381	-0.469359	-0.446995	-1.16381	0.589051	-0.282325	-0.105398
AT5G01340	0.228464	0.102833	-0.0766793	0.327145	-0.221371	-0.526514	0.00294067
AT1G55915	-0.16705	-0.0618395	-0.341576	0.0299343	-0.0889455	-0.263471	0.00282838
AT1G23410	-0.0210399	0.354652	0.26906	1.30578	-0.743306	-0.453206	0.207823
AT5G41160	2.34234	2.49586	2.8426	2.96996	0.0269763	0.527238	0.501077
AT5G50890	-0.0349727	-0.51768	-0.311243	-0.661905	0.278906	0.00263598	0.134681
AT5G44562	0.351322	0.0373978	-0.122398	0.809718	0.0427265	-0.430993	0.815047
AT5G55480	-0.571738	-0.446016	-0.704689	-0.824474	0.0747052	-0.0582458	-0.303753
AT4G04370	-0.145953	-0.312434	-0.35963	-0.635928	0.254219	0.0405418	-0.069276
AT1G45130	-0.680383	-0.435106	-1.02244	-0.890638	0.382412	0.0403532	-0.0731203
AT1G45110	-0.601163	-0.213387	-0.433458	-0.0514658	-0.149567	0.0181386	0.0123541
AT5G65925	-0.641728	0.469136	-0.729207	0.258468	0.303154	0.215675	0.0924856
AT3G01720	0.768412	0.0370787	0.122746	-1.56249	0.541239	-0.104427	-1.05833
AT3G47010	0.101981	-0.0678876	0.15539	-0.574785	0.433721	0.48713	-0.0731763
AT1G27020	-0.140873	-0.357729	-1.45933	-0.089934	0.927613	-0.390849	1.19541
AT1G79830	0.417555	-0.281594	-0.490743	-2.07987	0.806339	-0.101959	-0.991942
AT3G60040	0.619514	0.245677	0.0395487	-0.346763	0.285766	-0.2942	-0.306675
AT1G60810	-0.476254	-0.424803	-0.525262	-0.286162	-0.114696	-0.163705	0.0239447
AT1G55990	2.98739	0.215477	5.78611	3.45293	-3.61654	-0.817821	-0.379084
AT5G61560	0.370516	-0.724818	-0.306824	-2.30207	0.714324	0.0369837	-0.862926
AT1G29170	0.0902747	-0.795963	-0.730917	-2.09189	0.513986	-0.307206	-0.781943
AT1G49630	-0.336615	-0.54548	-0.920172	-1.5473	0.511727	-0.0718302	-0.490094
AT1G67210	-0.0837262	-0.237057	-0.138721	-0.334845	0.0101167	-0.0448786	-0.087672
AT4G19520	0.861028	-0.148258	-0.104132	-1.2791	0.68954	-0.27562	-0.441304
AT2G35980	5.92274	4.92194	22.2558	21.9524	-17.5579	-0.218852	0.478567
AT5G05790	-0.0609394	-0.0335954	-0.2136	-0.255212	0.275644	0.122983	0.0540274
AT5G39410	0.592079	0.0964958	0.131123	-0.973358	0.411994	-0.0489619	-0.65786
AT4G03430	0.345744	-0.364529	-0.527527	-1.9142	0.651999	-0.221272	-0.897667
AT1G70620	0.411715	-0.496948	-0.699683	-2.5495	0.783122	-0.328276	-1.26943
AT1G24530	0.976124	1.33419	1.0932	0.951015	0.211646	0.328726	-0.171532
AT1G67560	0.609887	-0.215543	-0.154055	-1.82731	0.709156	-0.0547855	-0.902606
AT5G58340	-0.241386	-0.562879	-0.444972	-1.45548	0.419408	0.215822	-0.473194
AT5G06460	0.374408	-0.348489	-0.60178	-1.95835	0.757351	-0.218837	-0.852505
AT4G21100	0.255064	-0.358045	-0.46603	-1.393	0.512156	-0.208938	-0.522803
AT5G60280	0.682041	0.242915	0.322475	-0.279054	0.185129	-0.174436	-0.33684
AT1G20920	-0.0356623	-0.40582	-0.681287	-1.38193	0.687686	0.0420612	-0.288425
AT3G14190	-0.0480541	0.189522	0.291018	1.04921	-0.16068	0.178391	0.699004
AT4G00305	2.68355	1.43066	4.36197	3.80465	-2.14267	-0.464242	0.231326
AT5G06270	-1.30876	0.00690316	-0.933847	0.293756	-0.143633	0.231276	0.14322
AT4G17750	0.378524	-0.218271	-0.219595	-1.24206	0.420993	-0.177126	-0.602799
AT5G54064	-0.173561	0.3095	-0.252623	0.146208	-0.103784	-0.182847	-0.267076
AT1G32860	-0.0697196	-0.205782	0.168954	0.179813	-0.24029	-0.00161697	0.145304
AT3G20898	-0.0328519	0.192385	0.569162	0.755419	-0.248922	0.353092	0.314112
AT4G29140	-0.772745	0.366745	-0.668843	0.281309	-0.10025	0.00365207	-0.185686
AT1G01480	5.29395	4.34155	4.23552	2.75844	0.694418	-0.364012	-0.888688
AT3G47090	1.07815	0.427632	0.656623	0.0055312	0.194269	-0.227261	-0.227831
AT5G52400	23.324	21.7913	22.2821	20.2709	0	-0.0358667	-1.52041
AT5G04480	0.507762	-0.138149	-0.277397	-1.09254	0.682989	-0.10217	-0.271402
AT1G70630	0.514262	-0.120277	0.134943	-0.151666	0.040476	-0.338843	0.00908716
AT1G74330	0.564076	0.0561999	-0.106417	-1.14568	0.456728	-0.213765	-0.745149
AT3G19180	-0.17262	-0.749035	-0.801455	-1.50387	0.322412	-0.306423	-0.432422
AT3G44716	-0.765589	-0.308467	-0.0859908	0.71631	-0.304665	0.374933	0.720111
AT5G62180	-0.387172	0.257105	-0.177945	0.557913	-0.0613335	0.147894	0.239474
AT1G78030	-0.812967	-0.101886	-0.222301	0.53933	-0.256354	0.334312	0.384862
AT1G09820	-0.296076	-0.30517	-0.675997	-0.744635	0.359708	-0.0202122	-0.0797571
AT5G06850	0.317133	-0.590696	-0.698759	-1.92414	0.443327	-0.572565	-0.890121
AT1G26190	0.00797206	-0.456703	-0.603595	-1.27058	0.248199	-0.363369	-0.565682
AT1G48880	-0.280023	-0.0102757	-0.304185	-0.0990502	-0.0711653	-0.0953274	-0.15994
AT3G12690	-0.0609798	-0.184362	-0.451808	-0.412008	0.0285503	-0.362278	-0.199096
AT3G43790	0.383525	0.116594	0.207932	0.104927	-0.123211	-0.298805	-0.134878
AT1G62120	-0.253615	-0.00675011	-0.389404	-0.161479	0.11379	-0.0219982	-0.040939
AT5G59760	1.6511	1.27878	1.79359	2.16356	-0.85331	-0.710818	0.0314703
AT5G46530	-0.151335	0.0113586	0.393353	0.653307	-0.261063	0.283625	0.380886
AT4G15165	0.026912	-0.132008	0.0775479	0.529307	-0.14403	-0.0933942	0.517284
AT2G38465	0.529223	0.580145	-0.38562	0.367427	0.0571007	-0.857742	-0.155617
AT1G01448	0.206285	-0.337235	-0.74174	-1.10237	0.313745	-0.63428	-0.451395
AT2G03140	0.399762	-0.416818	-0.621133	-1.9199	0.884112	-0.136783	-0.618966
AT4G00230	0.0411494	-0.435239	-0.345938	-1.11252	0.200005	-0.187083	-0.477275
AT1G69230	-0.736859	-0.0734562	-0.00636002	0.570342	-0.26019	0.470309	0.383609
AT1G61410	0.0846499	0.0326156	0.388279	0.182302	-0.119409	0.18422	0.0302782
AT1G73960	0.222623	-0.51079	-0.519192	-2.03633	0.723585	-0.0182296	-0.801957
AT1G02420	-0.292336	-0.103376	-0.2109	-0.193422	0.329298	0.410734	0.239252
AT5G15280	-0.000710943	-0.333003	-0.560162	-0.991032	0.632085	0.0726347	-0.0259432
AT5G13887	0.22856	-0.494522	-0.631026	0.387676	1.76708	0.907493	2.64928
AT5G64860	-0.370085	-0.382652	-0.298633	-0.292199	-0.207076	-0.135624	-0.116624
AT3G42052	0.00500748	0.178193	-0.0853442	0.233591	0.0102278	-0.0801239	0.0656256
AT2G32390	0.281165	-0.693626	-0.166443	-0.943558	0.373131	-0.0744767	0.123199
AT4G31050	-0.253243	-0.0585314	-0.308727	0.469544	0.206363	0.150879	0.734438
AT1G62680	-0.366442	-0.239094	-0.366673	-0.415137	0.131229	0.130997	-0.0448138
AT1G10240	0.213029	-0.272205	-0.450389	-1.5158	0.206958	-0.45646	-1.03664
AT2G42650	0.551857	0.181066	-0.11249	-0.524861	0.583833	-0.080514	-0.122095
AT1G20550	-0.222644	-0.258281	-0.110125	-0.328254	0.164546	0.277065	0.0945725
AT1G01680	2.38454	2.31845	2.96179	2.87895	-0.449228	0.128024	0.111272
AT3G21780	1.13809	0.803803	1.33729	0.965981	0.116415	0.315618	0.278593
AT1G76320	0.098655	-0.327997	-0.614414	-1.53286	0.657657	-0.055411	-0.547208
AT1G02700	0.137601	0.250919	-0.881276	-0.286601	0.217809	-0.801068	-0.319711
AT5G23930	-0.374354	-0.0131233	-0.0468061	0.610461	-0.302015	0.0255331	0.321569
AT3G50100	-0.461637	-0.361592	-0.290663	-0.0808148	0.373351	0.544325	0.654128
AT1G51380	-0.37546	-0.613664	-0.71027	-0.490227	0.162876	-0.171934	0.286313
AT5G59990	-0.0757014	-0.358555	-0.696932	0.592739	0.299248	-0.321982	1.25054
AT1G62930	0.0337837	-0.0162519	0.014672	-0.00128451	0.28395	0.264838	0.298917
AT5G66480	0.315499	0.22808	0.0653171	-0.158734	0.0959014	-0.154281	-0.290913
AT1G32100	0.428634	-0.555579	-0.203907	-1.29845	0.201863	-0.430679	-0.541009
AT5G40020	0.568842	-0.211353	0.358647	0.233736	-0.326379	-0.536573	0.11871
AT1G20030	0.815906	0.997655	1.39491	1.2265	-0.451383	0.127625	-0.222536
AT2G06210	0.325576	-0.477423	-0.606863	-1.91795	0.880342	-0.0520968	-0.560189
AT1G69210	-0.270646	0.111945	0.0744015	0.577329	-0.276828	0.06822	0.188556
AT2G18780	0.460045	0.330599	0.0892308	0.192134	0.154521	-0.216294	0.0160555
AT1G55250	0.11739	-0.262294	-0.639772	-1.58196	0.800591	0.0434286	-0.51908
AT4G39270	0.64697	-0.338766	-0.131408	-1.28546	0.407447	-0.370931	-0.539245
AT1G06850	-0.0215732	0.233543	-0.021944	-0.126475	0.0526955	0.0523248	-0.307321
AT4G27480	0.606235	-0.00930474	-0.161233	-0.485717	0.297909	-0.469558	-0.178503
AT3G27580	-0.447235	-0.61128	-0.537494	-0.537386	0.157962	0.067703	0.231856
AT2G21070	0.0679558	-0.222975	-0.514877	-0.960811	0.545959	-0.0368734	-0.191877
AT1G30760	1.98113	0.381522	1.37155	-0.738132	0.333682	-0.275894	-0.785973
AT5G44660	-0.0783792	-0.451027	-0.421197	-1.52649	0.420816	0.0779984	-0.654645
AT5G16730	0.744208	-0.583459	-0.44129	-2.20356	1.12326	-0.0622388	-0.496841
AT1G67720	0.838463	-0.179169	-0.555072	-1.82438	0.646328	-0.747208	-0.998882
AT2G20600	0.699105	-20.0645	-19.7338	-19.7338	-0.330668	-21.7696	0
AT2G07680	-0.155564	-0.795659	-0.736932	-1.57564	0.340928	-0.24044	-0.439052
AT2G40170	5.1813	3.33771	22.1093	21.3386	-17.879	0.0549501	1.12788
AT3G03970	0.0402613	0.0139939	-0.268994	-0.210326	0.312382	0.00312682	0.0880624
AT3G04450	-0.607311	-0.530616	-0.475101	-0.48658	0.00742618	0.139636	0.0514628
AT2G16850	-0.32869	-0.0792011	0.342797	0.85475	-0.543687	0.1278	0.390264
AT2G30362	1.5528	1.7243	1.21352	1.15277	0.558158	0.218875	-0.0133715
AT5G65900	0.0365086	-0.614425	-0.998616	-1.67907	0.700597	-0.334527	-0.364051
AT5G10430	0.0874277	0.470188	0.300759	0.736122	0.0277747	0.241106	0.293708
AT2G45360	2.40132	0.810035	2.73765	1.80494	-0.726897	-0.390574	0.268006
AT5G49470	0.0511577	-0.35792	-0.399441	-1.30741	0.60658	0.155981	-0.342914
AT5G04980	0.0553527	-0.460308	-0.495589	-1.02873	0.14538	-0.405562	-0.423037
AT1G10180	0.307375	-0.461884	-0.702236	-2.01282	0.569744	-0.439867	-0.981195
AT3G11760	0.0744065	-0.224523	-0.345083	-0.792356	0.255032	-0.164458	-0.312801
AT3G19440	-0.187037	-0.003952	-0.371749	-0.368264	0.317796	0.133084	-0.046516
AT1G10340	2.2287	1.54191	2.05471	0.619477	0.463726	0.289736	-0.458708
AT3G62499	-1.07088	-0.667144	-0.63646	0.00799423	-0.163944	0.270474	0.511195
AT1G67420	0.636601	0.15926	0.107068	-0.333077	0.175927	-0.353605	-0.31641
AT1G53035	0.167422	0.392932	0.217348	0.866479	-0.0532726	-0.00334601	0.420274
AT2G42365	-0.0763495	-0.209274	-0.233594	0.319194	-0.380203	-0.537448	0.148264
AT4G38050	0.328497	0.258728	0.0850598	0.0219731	0.148748	-0.0946892	-0.0880069
AT5G01400	0.305709	-0.45791	-0.544491	-1.47623	0.651342	-0.198857	-0.366981
AT1G07130	-0.0877138	0.00183295	0.179572	0.315167	-0.412261	-0.144975	-0.0989273
AT5G62480	2.88213	1.7058	2.40264	1.65691	0.332091	-0.147403	0.283202
AT2G36910	0.261827	-0.480885	-0.610855	-2.35461	0.809941	-0.0627406	-1.06378
AT5G14360	-0.0555062	-0.209106	0.921424	0.84885	0.637131	1.61406	1.69509
AT4G17215	1.7571	1.22808	1.69559	1.64914	-0.493887	-0.555389	-0.0728279
AT2G29065	0.474768	-0.107663	-0.232871	-0.595003	0.50992	-0.197719	0.0225805
AT3G02820	-0.922146	-0.179451	-0.415427	0.44909	-0.315043	0.191675	0.313498
AT3G60740	0.035686	-0.472848	-0.339747	-1.53975	0.301105	-0.0743285	-0.765793
AT1G16445	-0.940609	0.0180715	-0.537623	0.537427	-0.0814366	0.32155	0.437919
AT2G42960	1.02098	0.275626	0.566566	-0.462841	0.339444	-0.114966	-0.399023
AT3G52390	-0.224865	-0.010734	-0.165285	0.114915	-0.22113	-0.161549	-0.0954807
AT1G05120	0.563244	-0.109463	-0.289469	-1.43831	0.565761	-0.286952	-0.763087
AT5G04250	1.03773	1.23047	0.830573	0.754245	0.280802	0.0736458	-0.19542
AT2G24530	0.240049	-0.153204	-0.2631	-0.773212	0.48219	-0.020959	-0.137819
AT2G28053	0.618862	0.0967716	-1.01079	-0.166243	0.729182	-0.900466	0.466167
AT5G48670	0.316894	0.461328	0.147478	0.507079	0.18187	0.0124528	0.22762
AT3G50700	0.430276	0.283944	0.21187	0.389486	0.453002	0.234595	0.558544
AT4G21170	0.0101283	0.0716128	0.0938789	0.275074	0.216575	0.300326	0.420036
AT1G27660	-0.272717	-0.248459	-0.152673	0.0295906	-0.216724	-0.0966794	0.0613258
AT5G58550	-0.17589	-0.338521	-0.586488	-0.855691	0.297727	-0.112871	-0.219444
AT5G48560	1.29192	0.485073	0.818982	0.251717	0.181327	-0.291611	-0.0520297
AT5G25590	-0.674424	-0.611856	-0.765764	-1.48173	0.263976	0.172636	-0.605893
AT2G37025	2.0201	1.5789	1.12927	0.897939	0.785804	-0.105026	0.104839
AT3G02980	0.137034	0.466024	0.0633779	0.493998	-0.193324	-0.26698	-0.165351
AT1G26260	0.557847	0.245078	0.388649	-0.0139012	0.19567	0.0264717	-0.0633087
AT3G07280	0.330065	-0.202849	-0.439727	-1.05015	0.668733	-0.101059	-0.178568
AT5G14770	-0.0194115	-0.321359	-0.66702	-1.21072	0.613189	-0.0344194	-0.276167
AT5G01542	1.64798	0.58591	0.48471	-1.48416	0.488019	-0.675252	-1.58206
AT5G22220	0.0856537	-0.331937	-0.121203	-0.948102	0.34158	0.134723	-0.274585
AT5G56730	0.196386	-0.432238	-0.365014	-1.36656	0.464356	-0.0970436	-0.46997
AT5G53010	0.583928	-0.0898323	-0.499409	-1.25057	0.685958	-0.39738	-0.474776
AT3G48210	-0.299976	-0.432331	0.0427516	0.414016	-0.5015	-0.158773	0.344847
AT2G02770	-0.0495601	0.0444258	-0.193239	0.00661291	0.165431	0.0217518	0.127618
AT1G51940	0.43379	0.379871	-0.561912	0.0882634	0.459109	-0.536593	0.167501
AT4G24970	1.20268	0.810947	1.27121	0.325826	0.256334	0.324864	-0.228787
AT2G32900	0.438114	-0.0926686	-0.33162	-1.24525	0.593516	-0.176218	-0.559064
AT5G38880	-0.000223141	-0.495931	-0.604809	-1.68095	0.67475	0.0701645	-0.510267
AT4G24110	4.73645	4.8343	5.15755	3.94313	-1.04634	-0.625242	-1.93751
AT1G24270	-0.280407	-0.088726	-0.649958	0.478286	0.0593646	-0.310186	0.626377
AT4G24175	-0.512658	0.0313228	-0.0677887	0.473002	-0.206057	0.238812	0.235622
AT1G78960	0.191473	-0.320054	-0.422399	-0.87708	0.300129	-0.313742	-0.256897
AT1G80700	-0.0130476	-0.0315838	-0.06347	-0.0954141	0.232765	0.182343	0.168935
AT1G22830	-0.0432613	-0.130386	-0.316752	-0.243134	0.149032	-0.124458	0.0362844
AT5G22380	3.09435	3.16228	3.19527	3.48941	-0.33857	-0.237651	-0.0114424
AT2G40530	-1.07911	-0.359732	-0.729446	-0.0393541	0.292007	0.641672	0.612384
AT1G75730	0.179189	-0.50349	-0.218815	-0.334779	0.0522793	-0.345724	0.22099
AT5G49010	-0.516942	0.0586846	-0.0727489	-0.0647139	-0.111248	0.332946	-0.234646
AT1G03410	0.308437	0.00754302	-0.104329	-1.22708	0.0276036	-0.385163	-1.20702
AT4G01460	-1.3566	-0.735775	-0.753436	-0.00959856	0.121182	0.724346	0.847359
AT3G56900	-0.357646	-0.325865	-0.601337	-0.690933	0.264611	0.0209197	-0.100457
AT4G04790	-0.173949	-0.546147	-0.114407	-0.445245	0.402673	0.462216	0.503576
AT5G47250	0.14339	0.0683334	-0.145447	-0.629667	0.300803	0.0119666	-0.397197
AT5G46090	-0.159968	-0.328225	0.0730254	-0.110394	0.244224	0.477217	0.462055
AT4G31354	1.5039	-0.0677788	-2.58394	-0.975719	1.27028	-2.81755	0.362342
AT5G13270	-0.0986141	-0.416853	-0.221986	-0.751519	0.160875	0.0375031	-0.173791
AT4G36580	-0.270263	-0.485704	-0.495482	-1.16547	0.391852	0.166633	-0.287914
AT2G28570	0.111227	0.558477	-0.18777	0.897061	0.195805	-0.103191	0.53439
AT5G67410	0.663266	0.805078	0.483844	0.544844	0.46312	0.283698	0.202886
AT2G40930	0.285333	-0.395522	-0.486915	-1.98322	0.606067	-0.166181	-0.981635
AT5G19470	-0.519906	0.44444	0.420271	-0.681318	-0.398375	0.541802	-1.52413
AT1G56060	3.09638	3.93462	3.18555	4.2068	-0.0707232	0.0184473	0.201457
AT2G20960	0.398216	-0.149314	-0.130759	-2.26174	0.855995	0.32702	-1.25644
AT5G04840	0.405668	-0.0290284	0.18868	-0.0479627	-0.222099	-0.439087	-0.241033
AT4G20340	0.183248	-0.298442	-0.834966	-1.70273	0.701664	-0.31655	-0.702622
AT3G05850	0.392062	-0.242908	-0.5109	-1.644	0.615041	-0.287921	-0.786051
AT1G28050	1.1149	0.249953	0.214949	-0.482245	0.532846	-0.367107	-0.199352
AT5G38565	0.232378	-0.0155127	0.289021	0.740896	-0.183239	-0.126597	0.573169
AT4G30000	0.0671421	-0.30471	-0.713232	-1.32295	0.527006	-0.253368	-0.491232
AT3G02800	0.285541	0.215527	0.824696	0.714603	0.0156101	0.554766	0.514687
AT5G28450	-0.175081	0.336431	-0.347584	0.00767626	0.1019	-0.0706031	-0.226854
AT2G41730	-0.213911	0.834342	0.485444	1.36253	-0.641078	0.0582767	-0.112886
AT1G61310	0.0709837	-0.0949497	-0.250486	-0.519639	0.404163	0.0826929	-0.0205261
AT3G51760	0.0839766	0.0673302	0.353072	0.418619	-0.0919064	0.177189	0.259382
AT1G24330	1.01485	0.024117	0.00932524	-1.14263	0.174606	-0.830923	-0.99214
AT1G61030	0.292546	-0.295828	-0.457494	-1.85036	0.662102	-0.0879376	-0.89243
AT1G01930	0.472233	-0.459407	-0.624416	-2.17584	0.653446	-0.443203	-1.06299
AT5G43810	-0.337393	-0.711151	-0.498219	-1.89067	0.481556	0.32073	-0.697963
AT3G49600	-0.0562369	-0.522362	-0.641719	-1.61147	0.614565	0.0290824	-0.474543
AT2G01130	0.503628	-0.190595	-0.127512	-1.18339	0.466741	-0.164398	-0.526052
AT1G46264	-0.2165	0.237274	0.115046	0.611005	-0.28621	0.045336	0.0875214
AT1G04295	0.0580136	0.963348	-0.7917	0.762386	0.23957	-0.610144	0.0386079
AT1G06910	-0.130281	-0.529554	-0.436013	-0.570896	0.478461	0.172729	0.437119
AT5G09420	0.359695	0.214739	0.210287	-0.235583	0.28275	0.133342	-0.167572
AT1G79710	0.32942	0.132758	-0.311687	-0.171973	0.37434	-0.266767	0.0696077
AT4G28650	0.342523	-0.14408	-0.190156	-1.4979	0.383294	-0.149385	-0.970523
AT2G28080	0.0495919	0.201564	-0.304627	0.0759769	0.409489	0.0552707	0.283902
AT5G25475	-0.631753	-0.160668	-0.642269	-0.61537	0.0635039	0.0529878	-0.391198
AT5G26680	-0.0686372	0.00513218	-0.165584	-0.761278	0.231402	0.134455	-0.535008
AT3G55840	1.65453	1.69732	1.6446	1.13644	0.428022	0.418093	-0.132859
AT1G09421	1.81982	1.50502	1.06136	0.791309	0.174656	-0.583803	-0.539053
AT1G48120	0.122168	-0.414243	-0.652211	-1.78202	0.584467	-0.189912	-0.783311
AT3G54010	0.803786	-0.107863	-0.340591	-1.40195	0.782706	-0.36167	-0.511377
AT1G14630	0.37887	0.379509	0.187867	0.023491	-0.0898056	-0.280809	-0.445823
AT2G42900	-1.54526	-0.786754	-1.25572	-0.837861	0.490392	0.779934	0.439286
AT3G54910	-0.768364	-0.402178	-0.717146	0.0012839	-0.0171964	0.0340222	0.386266
AT5G38212	0.208313	-0.636155	-0.135207	-1.19827	0.315653	-0.027867	-0.246461
AT5G58130	0.460111	-0.298749	-0.593978	-2.51895	0.807129	-0.246959	-1.41307
AT2G21630	0.281022	0.159291	0.190181	-0.277103	0.124641	0.0337997	-0.311754
AT5G45060	0.271772	-0.291575	-0.282787	-1.63955	0.700175	0.145615	-0.647797
AT1G13980	0.439827	-0.2982	-0.579655	-2.17117	0.838377	-0.181105	-1.03459
AT3G27670	0.313816	-0.353621	-0.486217	-1.73032	0.780851	-0.0191828	-0.595848
AT3G57680	1.04412	-0.363851	-0.385945	-0.58799	0.853728	-0.576333	0.629589
AT1G29750	0.281979	-0.528577	-0.682565	-1.88671	0.646383	-0.31816	-0.711751
AT1G78820	-1.06793	-0.799354	-0.549164	-1.39724	0.207525	0.726293	-0.390363
AT2G04032	-0.166661	0.219999	0.118045	0.426336	0.229247	0.513952	0.435584
AT3G08943	0.0723673	-0.261442	-0.484335	-1.54969	0.439078	-0.117624	-0.849171
AT3G19570	-0.388995	-0.245895	-0.204422	-0.556903	0.0176664	0.20224	-0.293342
AT2G38970	0.403877	0.116451	0.158143	-0.830736	0.169561	-0.076173	-0.777626
AT5G55760	-0.249557	-0.175737	-0.0559171	-0.306296	0.083271	0.276911	-0.0472871
AT3G52100	0.436355	0.0902297	-0.104084	-0.687919	0.532825	-0.00761376	-0.245324
AT3G23230	-0.0460872	0.385591	-0.727691	0.489202	-0.0219692	-0.703572	0.0816422
AT4G23990	-0.671038	-0.956174	-0.744466	-0.882243	-0.109401	-0.18283	-0.0354701
AT5G57830	0.0984554	0.141915	0.391365	0.175669	0.0688143	0.361724	0.102569
AT1G50700	0.326139	-0.0263147	-0.389462	-0.806004	0.486918	-0.228682	-0.292771
AT4G11440	0.168734	-0.150552	-0.298401	-0.984818	0.20289	-0.264245	-0.631376
AT4G10380	0.558897	0.50131	-0.961449	0.269777	0.609327	-0.911019	0.377793
AT4G38420	0.146987	-0.196045	-0.0296893	-0.827713	0.380143	0.203467	-0.251525
AT5G51660	0.00620056	-0.363631	-0.61112	-1.74296	0.622124	0.00480358	-0.757209
AT3G07520	1.02519	0.377377	0.386994	-0.597691	0.442353	-0.19584	-0.532715
AT3G09360	0.632082	-0.1001	-0.353765	-1.35331	0.523754	-0.462093	-0.729459
AT5G02420	0.905291	0.411675	0.166346	0.416429	0.378736	-0.360209	0.38349
AT3G61360	-0.220289	-0.165339	-0.217993	-0.0589894	-0.116087	-0.113791	-0.00973766
AT2G39260	0.663429	-0.344435	-0.317256	-1.48063	0.805733	-0.174951	-0.33046
AT3G59320	0.173155	-0.0446014	-0.463242	-0.238838	0.354852	-0.281545	0.160615
AT3G12530	-0.43175	-0.0816111	-0.063231	-0.0404585	-0.231229	0.13729	-0.190076
AT2G12190	0.0692711	0.124781	0.10287	0.41968	-0.456613	-0.423015	-0.161714
AT3G10110	0.0389567	0.554991	0.156353	0.751382	-0.0562218	0.0611741	0.140169
AT1G54540	2.93588	0.542567	5.0242	2.90906	-2.8636	-0.775273	-0.49711
AT5G37340	-0.165303	-0.361624	-0.449235	-0.724776	0.0746634	-0.209268	-0.288489
AT3G55515	2.09391	2.29851	1.33742	1.28628	0.672117	-0.0843738	-0.340115
AT1G14170	0.95816	0.60422	0.807121	0.496507	0.170779	0.0197398	0.0630652
AT1G19290	0.0881229	-0.212697	-0.478378	-1.22457	0.428766	-0.137735	-0.583102
AT5G64220	0.521521	-0.30059	-0.336357	-1.54315	0.713924	-0.143954	-0.528636
AT5G18980	0.385694	-0.301722	-0.368373	-1.89569	0.615251	-0.138816	-0.978722
AT3G15150	-0.777865	-0.370872	-0.566843	-0.00581776	0.0128021	0.223824	0.377856
AT4G16144	0.940593	0.341278	-0.0756558	-1.04135	0.815283	-0.200966	-0.567341
AT5G67450	1.70056	1.17149	1.69359	0.919205	0.266865	0.259898	0.0145787
ATMG01170	-0.619458	-0.113792	-0.238632	0.58044	-0.170539	0.210286	0.523692
AT1G23460	0.422646	-0.378797	0.432418	-0.714128	-0.0962709	-0.0864986	-0.431602
AT4G03540	2.55895	0.611074	4.03747	2.85344	-2.0593	-0.580786	0.183059
AT1G80190	0.00419054	-0.0352835	-0.238172	-0.273811	0.244309	0.00194697	0.00578208
AT1G05210	0.0928212	0.86745	0.185835	1.41985	-0.130517	-0.0375035	0.42188
AT2G24650	0.250508	-0.454493	-0.478012	-1.25072	0.779399	0.0508788	-0.0168309
AT2G01330	0.101141	-0.066385	-0.321149	-0.745859	0.221193	-0.201098	-0.458282
AT1G64790	-0.0375222	-0.608458	-0.715936	-1.77953	0.729008	0.0505936	-0.442061
AT4G35940	0.70336	-0.468282	0.0579491	-1.66507	0.458754	-0.186656	-0.738033
AT1G25430	-0.270439	-0.57553	-0.542394	-1.31539	0.253981	-0.0179738	-0.485881
AT1G15165	-0.124207	-0.291241	-0.753658	-1.03022	0.143933	-0.485519	-0.595046
AT4G00590	0.249891	0.114265	-0.28591	-0.613151	0.428352	-0.107449	-0.299064
AT4G23450	0.776027	0.809204	0.84953	0.717348	0.34418	0.417683	0.252324
AT2G22260	-0.533841	-0.138947	-0.544415	-0.0108993	-0.07225	-0.0828235	0.0557973
AT2G22390	-0.236912	-0.158294	-0.104141	0.227202	0.0202688	0.153039	0.405765
AT5G58040	0.193626	0.0744768	-0.428825	-0.732873	0.816777	0.194326	0.00942762
AT3G21010	0.212724	0.353636	-0.252698	-0.171109	0.232426	-0.232996	-0.292318
AT5G40570	-0.368452	-0.184521	0.0445233	0.674091	-0.530548	-0.117573	0.328065
AT2G17280	-0.396633	-0.445099	0.284465	0.801319	-0.193381	0.487718	1.05304
AT2G22840	0.178817	0.25317	0.510884	0.372314	0.0423822	0.374449	0.161526
AT1G69070	0.296905	-0.285935	-0.520375	-1.69476	0.69479	-0.12249	-0.714032
AT4G30790	0.158799	-0.583747	-0.455447	-1.91019	0.661902	0.0476558	-0.664539
AT1G05760	0.579824	0.63426	0.328055	0.75397	0.458988	0.20722	0.578699
AT1G18840	-0.548357	-0.896404	-0.748568	-1.55464	0.31694	0.116729	-0.341296
AT1G67810	0.775947	1.24191	1.1916	1.57593	-0.0335601	0.38209	0.300457
AT3G11150	3.73252	2.72218	2.58007	2.37458	-0.228604	-1.38105	-0.576208
AT1G80060	-0.589617	-0.182044	-0.480047	-0.259098	0.132171	0.241741	0.0551174
AT1G52520	0.277249	-0.435201	-0.39384	-1.23281	0.525411	-0.145678	-0.272193
AT3G51650	0.314311	-0.156346	-0.350124	-1.22263	0.386683	-0.277751	-0.679596
AT3G24560	-0.513788	-0.543491	-0.556233	-0.935228	0.325571	0.283126	-0.0661659
AT5G06000	0.278284	0.243616	0.0455242	-0.114286	0.105424	-0.127336	-0.252478
AT5G05660	0.0823425	-0.236574	-0.454168	-1.58159	0.559841	0.0233307	-0.78517
AT5G05630	-0.278989	0.168023	-0.111564	0.476111	-0.215803	-0.0483779	0.092285
AT1G77660	0.120225	0.236223	0.267506	0.339534	-0.0282479	0.119033	0.0750635
AT1G62670	0.00690128	-0.0231782	-0.340725	-0.538267	0.237294	-0.110332	-0.277795
AT3G16840	0.449434	-0.310221	-0.605289	-1.65405	0.811158	-0.243565	-0.53267
AT3G62040	-1.51823	-0.812625	-1.44123	-0.526297	0.0447328	0.121729	0.33106
AT1G31150	-0.266607	-0.68187	-0.639822	-1.46252	0.376521	0.00330592	-0.404129
AT4G33240	0.402524	-0.363263	-0.529878	-2.25024	0.80102	-0.131382	-1.08596
AT1G75360	-0.749028	-0.292995	-0.487694	0.326433	-0.0116057	0.249728	0.607822
AT1G01010	1.16554	0.592933	0.574754	-0.334299	0.504221	-0.0865672	-0.423012
AT5G46500	0.946909	0.561249	0.224525	-0.122628	0.747963	0.025579	0.0640865
AT1G20960	0.158369	-0.552041	-0.946762	-2.33726	1.02123	-0.0838974	-0.763988
AT3G17450	0.239278	-0.459211	-0.510894	-2.28607	0.434823	-0.315349	-1.39204
AT1G46480	0.743986	0.455873	0.337359	0.270657	-0.360587	-0.767213	-0.545803
AT1G62990	1.29035	0.58695	1.1055	0.0708931	0.171889	-0.0129696	-0.344169
AT5G47810	-0.0136199	0.339022	-0.265501	-0.131398	0.279495	0.0276134	-0.190926
AT2G37430	3.41739	2.30629	4.45335	3.60816	-0.42309	0.612862	0.878773
AT5G40600	-0.205526	-0.131695	-0.178661	0.166842	0.0790119	0.105877	0.377549
AT3G53510	0.222644	-0.109792	0.0645531	-0.744079	0.147773	-0.0103178	-0.486514
AT1G11060	0.260589	-0.339687	-0.188208	-1.06765	0.336192	-0.112606	-0.391776
AT4G31270	0.0881405	-0.212444	-0.221109	-0.852001	0.561737	0.252487	-0.0778207
AT1G05300	0.530413	0.0906537	0.931797	0.0856025	-0.380807	0.0205767	-0.385858
AT4G01860	0.129093	-0.362117	-0.724996	-1.4916	0.605517	-0.248573	-0.52397
AT1G10586	23.6229	21.649	18.2036	19.1013	0	-4.41339	-2.5477
AT2G32830	1.58879	0.922977	1.51472	1.4934	-0.699365	-0.773432	-0.12894
ATMG00060	-0.130327	-0.105592	-0.0950136	0.138368	-0.185279	-0.149965	0.0586816
AT2G46560	0.310413	-0.2671	-0.559578	-1.30506	0.670787	-0.199204	-0.367172
AT5G04620	-0.268634	-0.215455	-0.597847	-0.173039	-0.0261863	-0.3554	0.0162296
AT3G48058	2.51086	1.2653	-2.42135	0.424939	3.40517	-1.52704	2.56481
AT5G50990	-0.0857533	-0.301063	-0.0659408	-0.267525	0.221005	0.240817	0.254543
AT4G04180	0.402064	-0.374094	0.0545602	-0.936167	0.319486	-0.0280183	-0.242588
AT3G59530	0.355628	0.0107563	-0.419376	-0.435236	0.358911	-0.416093	-0.0870814
AT3G01160	0.800667	-0.4435	-0.666674	-2.02301	0.915665	-0.551675	-0.663844
AT1G17230	0.510637	-0.600054	-0.19156	-1.24899	0.123865	-0.578332	-0.525076
AT4G04220	0.486772	0.12147	0.129575	-0.554338	0.19015	-0.167046	-0.485658
AT1G18900	0.433143	-0.314788	-0.431203	-2.22337	0.678983	-0.185363	-1.2296
AT2G28315	0.32047	0.189355	0.665696	-0.177801	-0.198678	0.146548	-0.565833
AT5G62940	0.48985	-0.0800301	0.476652	-0.049474	-0.269531	-0.282729	-0.238975
AT3G30214	0.981501	0.84829	0.936184	1.69382	-0.485151	-0.530467	0.360381
AT2G36050	-0.139017	0.628913	0.221041	0.667882	0.62435	0.984408	0.663319
AT5G20170	0.495884	-0.329395	-0.304608	-1.06596	0.386496	-0.413995	-0.350066
AT1G79540	0.146909	-0.0879532	-0.149798	-0.619537	0.181403	-0.115304	-0.350181
AT5G02820	-0.0746139	0.0563142	-0.184591	-0.631226	0.265681	0.155704	-0.421859
AT3G57780	-0.00274729	-0.460461	-0.572987	-1.3121	0.368438	-0.201801	-0.483198
AT3G23900	0.246757	-0.417593	-0.536245	-1.99935	0.699612	-0.0833896	-0.882144
AT5G61390	0.337578	-0.269925	-0.00587675	-0.701785	0.197522	-0.145933	-0.234338
AT5G13530	0.564943	0.131575	-0.324315	-0.987193	0.80448	-0.0847778	-0.314288
AT4G39160	0.310423	-0.500751	-0.620847	-1.68577	0.785186	-0.146084	-0.399836
AT4G25434	-0.0544466	-0.283293	-0.106738	0.176819	-0.2025	-0.254792	0.257612
AT2G44790	3.67636	2.69539	2.25474	2.17538	0.997071	-0.424547	0.477066
AT2G14680	0.576013	-0.36549	-0.502538	-1.48149	0.712042	-0.366509	-0.403957
AT5G43560	0.479991	-0.455554	-0.450145	-2.17598	0.866394	-0.0637427	-0.854029
AT1G25211	0.456622	0.321016	-0.122935	-0.18508	0.1405	-0.439057	-0.365596
AT1G12430	0.169694	-0.374537	-0.417895	-1.4572	0.457684	-0.129904	-0.624978
AT5G04200	0.0157434	-0.690216	-0.605984	-0.841105	0.117902	-0.503825	-0.0329872
AT4G31240	0.653355	0.507705	0.36737	0.510473	0.248266	-0.0377195	0.251035
AT1G32190	0.164751	0.564662	0.0994617	0.801026	-0.0788729	-0.144163	0.15749
AT1G51965	-0.115974	-0.258921	-0.406681	-0.909101	0.279582	-0.0111255	-0.370598
AT3G06340	0.237326	-0.577515	-0.541725	-1.78336	0.597131	-0.18192	-0.608713
AT5G02080	-0.132618	-0.0198592	-0.271931	0.634337	0.039415	-0.0998971	0.693611
AT4G15710	-0.614653	-0.563938	-0.264817	0.305287	-0.531201	-0.181365	0.338024
AT1G01380	-0.328049	0.116458	0.658271	1.10245	-0.516048	0.470272	0.469945
AT2G25660	0.162284	-0.490931	-0.726717	-1.69887	0.7939	-0.0951019	-0.414038
AT3G51720	-0.0145369	-0.269154	-0.0280571	-0.551379	-0.0087904	-0.0223105	-0.291015
AT2G35170	-0.256043	-0.255625	-0.542817	-0.723622	0.309997	0.0232229	-0.158
AT5G52740	0.116822	1.25088	0.609729	1.276	0.265837	0.758744	0.290954
AT4G29540	-0.0787652	0.0725571	-0.15665	-0.229336	0.0405382	-0.037347	-0.261355
AT3G49920	-0.195455	-0.212533	0.449893	0.641907	-0.730762	-0.0854148	0.123678
AT5G58960	-0.53896	-0.86417	-0.803209	-2.19624	0.407815	0.143566	-0.924259
AT4G02020	0.660827	-0.764235	-0.780897	-1.76226	0.886702	-0.555023	-0.11132
AT3G06250	0.081854	-0.342823	-0.463516	-1.4794	0.337073	-0.208298	-0.799503
AT3G58975	-0.681428	-0.226316	-0.472153	0.0874861	0.0233199	0.232595	0.337122
AT1G16530	-0.0115548	-0.024195	-0.391755	0.103296	0.0977331	-0.282467	0.225224
AT5G37660	0.00812674	0.0746012	0.0800233	0.442442	-0.31325	-0.241354	0.0545899
AT3G24810	-0.0525474	-0.0381885	0.0681917	0.247166	-0.263519	-0.142779	0.0218363
AT4G40070	0.00826163	0.123883	-0.356054	0.339756	-0.257126	-0.621442	-0.0412536
AT4G20060	0.0130787	-0.165993	-0.264312	-0.43924	0.264091	-0.0132994	-0.00915562
ATMG01360	0.0793609	-0.109942	-0.611513	-0.436306	0.467475	-0.2234	0.141112
ATMG01120	1.10252	-1.29673	0.906714	1.46621	-0.507058	-0.70286	2.25588
AT1G77880	-0.554543	0.189518	-0.357356	0.252071	-0.161565	0.0356223	-0.0990119
AT4G30410	-0.564581	-0.173027	-0.894535	-0.356691	0.393308	0.0633549	0.209644
AT4G04920	0.888826	-0.0286927	-0.179256	-1.06819	0.657322	-0.41076	-0.382172
AT2G01740	-0.267077	-0.120038	-0.326857	-0.0536262	0.145514	0.0857341	0.211926
AT3G46150	-0.0614005	0.434554	0.256326	0.879415	-0.209931	0.107796	0.234931
AT1G01640	0.628883	0.145901	-0.136155	0.254922	0.140965	-0.624073	0.249986
AT4G12670	0.251411	-0.289376	-0.649106	-1.20842	0.791782	-0.108735	-0.12726
AT4G32670	-0.0914729	-0.301881	-0.473166	-1.41358	0.329308	-0.0523853	-0.78239
AT4G33440	0.0534852	0.385474	-0.143925	0.441699	0.0174987	-0.179912	0.0737242
AT5G39900	-0.035958	-0.351024	-0.264468	-0.854315	0.156703	-0.0718068	-0.346588
AT1G19540	1.55221	0.313009	1.51234	0.6012	-0.43937	-0.479246	-0.151178
AT5G16820	0.918141	-0.258915	-0.0835793	-1.16023	0.637733	-0.363987	-0.263584
AT1G21630	0.324045	-0.172722	-0.474908	-2.43843	0.806732	0.00777924	-1.45897
AT4G09020	0.833672	-0.0595993	0.177462	-0.573537	0.342095	-0.314114	-0.171842
AT3G28260	23.0292	0	0	0	0	-23.0292	0
AT1G76760	0.455848	0.338574	0.308917	1.40804	-0.340529	-0.48746	0.728939
AT1G19100	-0.111645	-0.133349	-0.318467	-0.42445	0.207832	0.0010099	-0.0832686
AT2G31600	-0.00173848	-0.204981	-0.345588	-0.704751	0.0611182	-0.282731	-0.438652
AT1G63130	-0.424661	-0.14543	-0.228085	-0.0460827	0.170926	0.367501	0.270273
AT2G36740	0.282668	-0.621373	-0.665785	-1.33875	0.769816	-0.178637	0.0524407
AT2G12462	-0.146952	-0.296341	-0.237475	-0.811878	-0.0894261	-0.179949	-0.604963
AT4G09012	0.221762	0.379003	0.00843703	1.078	0.0467092	-0.166615	0.74571
AT4G20740	-0.399695	-0.268668	-0.705807	-0.527589	0.190205	-0.115907	-0.0687166
AT1G45332	0.450124	-0.114675	-0.589435	-1.73206	0.887327	-0.152233	-0.730059
AT1G32240	-0.266188	-0.650791	-0.399987	-1.43504	0.194981	0.0611824	-0.589265
AT5G24710	0.114122	-0.511071	-0.673215	-2.25758	0.651066	-0.136271	-1.09544
AT3G55890	2.09346	1.49399	1.66504	1.641	0.202481	-0.225937	0.349495
AT1G32610	-0.233882	-0.0866883	0.45148	0.452557	-0.305407	0.379955	0.233839
AT5G64950	-0.0078424	0.294657	-0.165429	0.564942	0.120704	-0.0368826	0.390989
AT1G56020	0.107202	0.155841	0.348764	0.161941	-0.319815	-0.0782539	-0.313716
AT4G03140	-0.0304518	-0.459612	0.00471396	-0.390208	0.212735	0.247901	0.282139
AT1G01570	1.23826	0.473901	1.03791	0.477439	-0.477111	-0.67746	-0.473574
AT1G71990	-0.525646	-0.114506	-0.590164	-0.4393	0.154788	0.0902695	-0.170006
AT4G19810	4.76685	3.24506	7.11417	6.02028	-2.50137	-0.154045	0.273859
AT5G57840	0.21127	-0.331727	-0.311538	-0.626638	-0.02715	-0.549958	-0.322061
AT3G23109	-0.160027	-0.143649	-0.146611	-0.164517	0.0341543	0.0475702	0.0132858
AT2G25060	0.146217	0.300865	0.923607	1.21928	-0.592226	0.185164	0.326187
AT4G34138	-0.06915	-0.199635	-0.157967	-0.565896	0.932364	0.843546	0.566102
AT5G52910	0.941435	0.0227257	0.277335	-0.0589577	0.486766	-0.177334	0.405083
AT5G64970	0.0774982	0.172169	0.196114	0.479737	-0.200225	-0.081609	0.107343
AT2G26920	0.714714	-0.469444	-0.222872	-1.72819	0.585041	-0.352545	-0.673701
AT1G12200	0.100314	-0.431656	-0.212074	-1.2971	0.296049	-0.0163388	-0.569393
AT5G16570	0.204077	0.226504	-0.230106	-0.982748	0.78561	0.351427	-0.423642
AT1G31480	0.528966	-0.518828	-0.355109	-1.64354	0.625735	-0.258341	-0.498982
AT4G32010	0.537866	-0.243073	-0.152262	-1.69787	0.457817	-0.232311	-0.996977
AT5G65390	0.76238	1.56289	-0.418005	1.6998	0.0426983	-1.13769	0.179612
AT1G03190	0.263221	-0.140761	-0.391442	-0.798226	0.408351	-0.246311	-0.249113
AT5G37590	-0.0167857	-0.53593	-0.381082	-0.699821	0.179622	-0.184674	0.0157313
AT3G58100	-0.813508	0.0220375	-0.582457	0.281028	-0.172725	0.0583262	0.0862654
AT4G15990	0.510001	1.05581	0.38842	-0.195429	0.486757	0.365177	-0.764481
AT4G25480	0.128382	-0.309321	0.503759	0.180436	0.278219	0.653597	0.767976
AT4G15620	-1.89018	-0.687265	-0.649862	0.197234	-0.713947	0.526373	0.170553
AT1G36940	0.225785	0.420832	0.0195317	-0.0882001	0.49963	0.293376	-0.00940264
AT1G23890	-0.441791	-0.32536	-0.556124	-0.10987	0.00680075	-0.107531	0.222291
AT5G07790	0.441769	-0.19213	0.174478	-0.798392	0.307918	0.0406268	-0.298344
AT2G18620	0.757197	0.534626	0.748833	0.329252	-0.394239	-0.402603	-0.599613
AT5G65410	-1.65451	-0.208702	-0.87397	0.0683519	-0.206953	0.573583	0.0701004
AT2G43500	0.158835	-0.728266	-0.680856	-1.34832	0.373318	-0.466373	-0.246737
AT1G08160	-0.163154	-0.573484	-0.0453807	-0.436793	-0.16863	-0.0508565	-0.0319393
AT3G08880	0.247203	0.541578	0.384468	0.811134	-0.0746154	0.0626496	0.19494
AT4G30940	-0.319114	-0.43233	-0.464854	-0.111861	0.165275	0.0195358	0.485744
AT2G45760	2.00514	1.25804	2.10971	2.13289	-0.129284	-0.0247153	0.745568
AT5G27450	-0.874135	-0.241725	-0.588227	0.4518	-0.200148	0.0857606	0.493377
AT5G19670	-0.180684	-0.345107	-0.275341	-0.914161	0.143456	0.048799	-0.425597
AT3G18850	-1.32157	-0.790283	-0.945395	-0.435491	0.106073	0.482244	0.460865
AT1G55365	1.45485	1.27139	2.35029	2.6587	-0.867547	0.0278927	0.519766
AT1G80870	-0.0657886	-0.373744	-0.532123	-1.06119	0.173453	-0.292882	-0.513991
AT4G35420	0.0697497	0.0833786	-0.143971	-0.0933482	-0.141543	-0.355263	-0.318269
AT1G02400	0.756184	0.151963	0.319592	0.0354969	0.296127	-0.140465	0.179661
AT3G47570	1.21017	1.01737	1.12689	0.754442	0.454209	0.37093	0.191279
AT5G19100	1.7163	1.86211	1.87971	1.5003	-0.234546	-0.0711319	-0.596358
AT2G46940	-0.110401	0.357099	0.29146	0.626658	-0.419202	-0.0173407	-0.149644
AT3G60290	-0.661825	0.0398357	-0.808067	0.0321796	0.229784	0.0835414	0.222128
AT1G49040	0.4025	-0.17573	-0.33779	-1.3315	0.511513	-0.228777	-0.644252
AT3G12340	0.0995073	-0.296339	-0.666153	-1.39805	0.463739	-0.301921	-0.637966
AT1G79310	3.55644	2.55477	2.73803	1.80427	0.420353	-0.398051	-0.33015
AT5G08240	2.36918	2.50045	2.32507	2.71533	-0.0512357	-0.0953387	0.163637
AT5G41650	-0.203378	0.318261	0.396576	1.2364	-0.376453	0.223501	0.54169
AT3G57980	-0.322105	0.102902	-0.236214	0.0664613	-7.72526e-05	0.0858138	-0.0365176
AT4G16100	0.439633	-0.0136207	-0.286687	-1.05288	0.485953	-0.240367	-0.553309
AT5G58790	-0.201083	0.0555016	-0.474075	-0.0299881	0.212275	-0.0607176	0.126785
AT3G46080	2.58381	2.64527	3.09003	2.60261	-0.424802	0.0814158	-0.467463
AT1G68610	-0.492869	0.230006	0.395439	0.545735	-0.32388	0.564429	-0.00815106
AT5G42200	-0.24639	0.381955	0.357339	0.803937	0.618973	1.2227	1.04095
AT5G11930	0.374042	0.38394	0.606592	1.09989	-0.584617	-0.352067	0.131331
AT1G36680	-0.292045	-0.107037	-0.58181	-0.375729	0.0190947	-0.27067	-0.249597
ATMG01220	-0.611797	-0.143186	-0.00111295	0.772183	-0.301682	0.309002	0.613687
AT4G16900	0.312104	0.0184429	-0.288691	-0.773673	0.566748	-0.0340482	-0.225368
AT5G41580	-0.238587	-0.60672	-0.32822	-1.24638	0.0773792	-0.0122533	-0.562285
AT5G35410	0.301171	-0.0185219	-0.249151	-0.964199	0.486129	-0.0641928	-0.459549
AT5G41150	0.357226	-0.150921	-0.363056	-1.20177	0.518655	-0.201627	-0.532194
AT5G47440	-0.458987	-0.37465	-0.354769	-1.0142	0.040494	0.144711	-0.599056
AT3G10960	0.0456567	0.179385	-0.320826	-0.418618	0.308258	-0.0582246	-0.289745
AT2G01460	0.66887	-0.0934436	-0.306987	-1.02316	0.644167	-0.331689	-0.285554
AT4G15570	0.063742	-0.299674	-0.536541	-1.01977	0.296072	-0.304212	-0.424028
AT3G02840	4.07844	3.18084	3.25512	2.76338	0.590946	-0.232367	0.173484
AT3G54980	0.397355	-0.178586	-0.464214	-1.39334	0.55709	-0.304479	-0.657663
AT5G20930	0.129424	-0.358068	-0.363063	-1.34831	0.449701	-0.0427863	-0.540539
AT5G40340	0.612401	-0.694989	-0.536729	-1.59314	1.32588	0.176751	0.427734
AT5G47400	0.180405	-0.102118	-0.347982	-0.887743	0.357239	-0.171148	-0.428386
AT3G51320	-0.00592278	-0.114642	-0.130734	-0.0166676	-0.187776	-0.312587	-0.0898009
AT5G37530	0.194808	-0.135065	-0.354417	-0.37424	0.00268962	-0.546536	-0.236484
AT5G44980	-0.203313	-0.100591	0.249656	0.768418	-0.235571	0.217399	0.633438
AT1G30040	1.42812	1.54128	0.730085	1.00509	0.324222	-0.373813	-0.211966
AT2G47890	-0.0809295	-0.200414	0.0653229	-0.292004	-0.0712703	0.0749822	-0.16286
AT5G01740	-0.947043	1.1402	-1.25432	-0.23986	0.845956	0.538678	-0.534099
AT4G34360	-0.0665008	0.709595	-0.160295	0.741544	0.34584	0.252045	0.377789
AT3G61850	0.151933	0.0623935	0.0667165	0.419931	0.0426533	-0.0425627	0.400191
AT1G34420	2.91614	2.06909	1.87405	0.693474	0.540637	-0.501462	-0.834981
AT5G07180	-0.508799	-0.518387	-0.19825	-0.737934	-0.152489	0.15806	-0.372037
AT1G55690	-0.24008	-0.666697	-0.513752	-1.39865	0.244002	-0.0296701	-0.487949
AT2G39480	0.410509	-0.231163	-0.170859	-1.61741	0.667679	0.0863108	-0.718571
AT1G32120	-0.0236643	0.122042	0.168093	0.523166	0.0134241	0.205182	0.414547
AT5G13590	0.379269	-0.290024	-0.449749	-1.55437	0.869431	0.0404128	-0.394919
AT4G01920	0.557244	0.11454	0.273175	-0.0717441	-0.00419827	-0.288267	-0.190483
AT1G12330	-0.647492	-0.500776	-0.677762	-1.1154	0.109061	0.0787911	-0.505565
AT1G31935	-0.0405268	-0.00877891	0.0963246	0.660309	0.000978284	0.13783	0.670066
AT3G13440	0.225469	0.0326825	-0.559029	-1.08933	0.470348	-0.31415	-0.65166
AT5G40550	0.112721	-0.0597875	-0.183419	0.12179	0.488662	0.192521	0.67024
AT4G02280	1.64923	0.288845	0.134002	-1.90265	0.572872	-0.942352	-1.61862
AT2G17830	-0.283142	-0.089044	-0.0540213	0.240263	0.37151	0.60063	0.700817
AT4G10570	0.295701	-0.243464	-0.124727	-0.909276	0.233201	-0.187227	-0.43261
AT1G50410	0.57705	-0.283079	-0.232241	-1.68637	0.705192	-0.104099	-0.698094
AT2G20850	0.0525524	-0.512935	-0.295636	-0.931936	0.151498	-0.196691	-0.267503
AT3G03340	0.179923	-0.158672	-0.329794	-1.12231	0.576825	0.0671075	-0.38681
AT1G23880	0.0244209	-0.0150536	0.149894	-0.137737	0.00895866	0.134432	-0.113724
AT5G58690	1.20238	-0.0986345	-0.340692	-1.2304	0.859098	-0.683971	-0.272663
AT5G35450	-0.161657	-0.809261	-1.01425	-1.3848	0.768537	-0.0840591	0.192997
AT1G53350	0.17207	-0.0439968	0.33967	0.000817721	0.291308	0.458908	0.336123
AT4G38545	0.197991	0.0748239	-0.326966	-0.623609	0.239505	-0.285452	-0.458927
AT4G24790	-0.453064	-0.608365	-0.669043	-1.14313	0.19163	-0.0243497	-0.343132
AT1G18270	0.841859	-0.129563	-0.161375	-1.74261	0.821669	-0.181565	-0.791376
AT4G16515	-0.586315	-0.51707	0.254079	1.05557	0.031578	0.871972	1.60422
AT1G12790	-0.0346475	-0.0614807	-0.245537	0.494827	0.168714	-0.0421757	0.725022
AT5G19730	-1.22871	-0.626288	-0.768074	-0.731595	-0.0686598	0.391971	-0.173966
AT1G15150	0.169309	-0.0282757	0.106693	-0.102743	-0.251249	-0.313866	-0.325717
AT5G59070	0.370831	0.570284	0.253992	0.106367	0.204061	0.0872222	-0.259856
AT4G21940	-0.145844	-0.841656	-0.360762	-0.896337	0.379309	0.16439	0.324628
AT5G50170	0.260107	-0.103063	-0.293896	-1.07591	0.498542	-0.0554607	-0.474301
AT4G00310	-0.0333557	-0.12012	-0.124365	0.153487	-0.243729	-0.334738	0.0298778
AT1G80690	-0.884567	-0.416332	-0.372949	0.057969	-0.173229	0.338388	0.301071
AT1G17070	0.349445	-0.102066	-0.394603	-1.30476	0.60001	-0.144038	-0.602684
AT2G07774	-0.529593	0.018448	-0.0150971	0.856074	-0.205986	0.30851	0.63164
AT4G11845	0.0646709	0.0858801	-0.258194	-0.268053	0.569246	0.246382	0.215313
AT1G55350	0.0456277	-0.391814	-0.706777	-1.92015	0.791026	0.0386219	-0.737313
AT3G16030	0.764922	0.00968242	-0.175873	-0.938387	0.415673	-0.525122	-0.532397
AT1G62030	-0.727297	-0.594367	-0.52267	-0.585535	-0.102834	0.101793	-0.094002
AT2G35700	-0.759433	0.104361	-0.235445	0.584034	-0.548681	-0.0246933	-0.0690084
AT3G18485	0.468791	-0.224714	0.391867	-0.249046	-0.146875	-0.223799	-0.171208
AT5G07770	0.894052	0.51928	0.740636	0.170201	0.306179	0.152763	-0.0429
AT2G15780	7.35456	5.6472	6.44628	5.04178	0.548436	-0.359846	-0.056981
AT1G04520	-1.5581	-1.00417	-1.31782	-0.644474	-0.0944958	0.14578	0.265205
AT2G32250	0.108281	-0.318867	-0.488459	-0.985698	0.505871	-0.0908695	-0.16096
AT5G08630	0.60394	-0.186114	-0.133625	-1.23003	0.53349	-0.204075	-0.510421
AT2G01830	0.57934	-0.246939	-0.195043	-1.02021	0.443501	-0.330881	-0.329765
AT4G30980	0.743055	0.206973	0.257933	-0.110535	-0.144011	-0.629133	-0.461519
AT5G61910	0.039088	-0.465072	-0.537015	-1.64701	0.573914	-0.00218932	-0.608021
AT5G19210	-0.574854	-0.28133	-0.362554	-0.264038	-0.146681	0.0656193	-0.129389
AT1G14770	-0.421206	-0.411487	-0.573805	-0.63202	0.299576	0.146978	0.0790435
AT5G08350	0.0569147	0.200091	0.339262	0.191356	0.726568	1.00892	0.717833
AT2G40240	-0.5789	0.11374	-0.574639	-0.0167923	0.17995	0.184211	0.0494174
AT3G25030	-1.14522	-0.296414	-0.866537	-0.208108	0.130925	0.409602	0.219231
AT4G36680	0.344253	0.0116613	0.0689361	-0.505194	0.217847	-0.0574698	-0.299008
AT2G41210	0.344707	-0.336903	-0.618644	-1.11166	0.604323	-0.359027	-0.170428
AT1G51035	0.838281	0.122477	0.489003	0.900268	-0.549625	-0.898903	0.228167
AT2G22790	-0.121994	0.159293	-0.0601281	0.217219	0.0260788	0.0879448	0.0840045
AT5G64320	-0.180957	-0.233078	-0.455206	-0.764917	0.0781655	-0.196083	-0.453674
AT1G20691	-0.134729	0.196223	0.421583	0.842783	-0.455612	0.1007	0.190948
AT1G55525	22.513	20.7632	20.8742	18.6551	0	-0.632814	-2.10803
AT1G20120	0.264406	-0.0977169	-0.185058	0.170892	-0.0238765	-0.473341	0.244733
AT1G76950	0.212721	-0.32926	-0.566814	-1.61841	0.639453	-0.140082	-0.649698
AT1G19190	1.71659	1.00669	0.735226	0.487164	0.357416	-0.623945	-0.162108
AT1G10050	1.03595	0.0500672	-0.108863	-1.6817	0.724758	-0.420056	-1.00701
AT1G56670	-1.22367	-0.638694	-0.735703	-0.594529	-0.0898548	0.398112	-0.0456894
AT5G62500	0.561303	0.542509	0.377814	0.470824	-0.0392747	-0.222763	-0.110959
AT4G03550	0.760072	-0.00351463	-0.327642	-1.38663	0.807064	-0.28065	-0.576052
AT3G45750	0.0417707	-0.436821	-0.481953	-0.983875	0.482703	-0.0410206	-0.0643515
AT3G53350	0.0797676	-0.791701	-0.242307	-1.23366	0.391359	0.0692843	-0.0506017
AT3G07320	0.977603	0.747994	0.776031	0.439682	-0.0335521	-0.235124	-0.341864
AT1G09480	0.701323	0.889758	0.446741	1.00355	-0.434408	-0.68899	-0.320616
AT5G02640	-0.336452	-0.501247	-0.58256	-0.157465	-0.0710434	-0.317152	0.272739
AT3G17900	0.206668	-0.239028	-0.465399	-1.9005	0.565096	-0.106972	-1.09637
AT3G02390	0.610048	0.436885	0.10473	-0.988381	0.459793	-0.0455244	-0.965473
AT4G35930	-0.128367	-0.17214	-0.171386	0.0953056	-0.191602	-0.23462	0.0758438
AT5G18340	0.774394	0.268913	-0.153763	-0.967494	0.557655	-0.370503	-0.678752
AT3G07400	0.157924	-0.238073	-0.572163	-1.70667	0.63611	-0.093977	-0.832488
AT3G53090	0.402511	-0.256402	-0.554683	-1.51067	0.660242	-0.296952	-0.594026
AT5G23155	-0.696319	-0.066396	-1.8985	-0.309479	0.181559	-1.02063	-0.0615249
AT4G00905	0.335278	0.0179234	0.184686	0.389291	-0.240723	-0.391315	0.130644
AT3G23870	1.76262	1.32273	1.08171	1.43387	0.363289	-0.317622	0.474434
AT3G57470	0.0235158	-0.582656	-0.535985	-1.52178	0.572422	0.0129213	-0.366702
AT5G58440	0.205331	-0.191031	-0.620475	-1.67013	0.618748	-0.207057	-0.860349
AT3G51915	22.0007	0	0	0	0	-22.0007	0
AT1G77210	-0.0776917	0.171252	0.285247	0.193153	0.420537	0.783476	0.442439
AT3G16650	0.0967061	-0.208849	-0.522118	-1.45155	0.420432	-0.198392	-0.822268
AT5G02170	2.81273	2.31593	2.28957	1.0681	0.027465	-0.495695	-1.22037
AT1G07810	0.414989	-0.277049	-0.500051	-2.10918	0.651017	-0.264023	-1.18112
AT4G04221	0.732029	0.481543	0.347348	0.282896	-0.159108	-0.543789	-0.357755
AT2G36090	1.16513	0.998958	1.13059	1.17334	0.0603523	0.025811	0.234737
AT2G05810	-0.903702	0.169093	-0.409253	0.684614	-0.374683	0.119766	0.140838
AT1G29300	0.280498	0.552014	0.218937	0.40742	-0.00967687	-0.0712386	-0.154271
AT4G28080	-0.465914	-0.734692	-0.858143	-2.02422	0.622804	0.230574	-0.666728
AT2G24050	0.0847013	-0.386728	-0.520701	-1.75455	0.171422	-0.43398	-1.1964
AT5G28530	-0.077865	-0.116273	-0.320038	-0.510428	0.376661	0.134488	-0.0174942
AT2G33540	0.0990751	-0.55293	-0.618728	-1.89926	0.652497	-0.0653066	-0.693832
AT5G41180	1.18049	0.557165	0.900734	0.433188	0.00393784	-0.27582	-0.120039
AT1G76410	-0.195056	0.238918	-0.0303717	0.484888	0.0087359	0.17342	0.254706
AT3G48360	0.259143	1.64782	0.860678	1.54378	1.30405	1.90558	1.2
AT3G60240	0.357357	-0.240354	-0.443477	-1.63838	0.764405	-0.0364289	-0.63362
AT1G80170	-0.355349	-0.0872039	-0.263548	0.0647128	-0.0432408	0.0485594	0.108676
AT4G27430	-0.324756	-1.09276	-0.827334	-2.63824	0.697895	0.195316	-0.847584
AT4G27360	-1.39431	-0.653044	-1.02369	-0.782479	-0.154061	0.216565	-0.283496
AT3G05670	0.368156	-0.428085	-0.540337	-1.78786	0.891502	-0.0169919	-0.468276
AT3G04810	0.252411	-0.452846	-0.730152	-1.89289	0.567391	-0.415171	-0.872654
AT5G45610	0.149776	-0.281295	-0.184092	-0.500275	0.110167	-0.223701	-0.108814
AT2G42350	3.45072	2.95537	3.55772	3.12841	-0.294638	-0.187639	-0.121592
AT4G21900	0.0729433	-0.240108	-0.678563	-0.980163	0.249911	-0.501595	-0.490144
AT4G17490	1.53622	1.4915	0.972064	1.24918	0.976887	0.412735	0.734564
AT3G54320	0.0788478	-0.0526222	0.052849	-0.368604	-0.102534	-0.128533	-0.418516
AT4G20190	5.16117	3.91497	4.29501	3.06081	0.0233839	-0.842772	-0.830778
AT3G50800	0.348809	1.26263	0.512641	1.0776	0.102501	0.266333	-0.0825326
AT5G63690	0.304588	0.198603	-0.00583613	0.432312	-0.277658	-0.588082	-0.0439493
AT2G12550	1.0044	0.158335	0.289386	-0.494347	0.126285	-0.588729	-0.526397
AT5G52830	0.23008	-0.292767	-0.116121	0.592575	-0.159194	-0.505394	0.726148
AT3G13700	-0.392228	0.0307283	-0.0833748	0.400924	-0.197348	0.111505	0.172848
AT3G62240	0.339259	-0.443776	-0.296257	-1.92972	0.646533	0.0110171	-0.839408
AT5G02460	0.108593	0.217404	0.172274	0.163553	-0.491984	-0.428303	-0.545835
AT3G48050	0.415271	-0.310812	-0.448542	-2.02245	0.766161	-0.097652	-0.945476
AT3G05680	-0.0342775	-0.4367	-0.581766	-1.56122	0.560792	0.0133039	-0.563732
AT3G04950	-0.408243	-0.218113	-0.499516	0.0166118	-0.041444	-0.132717	0.193281
AT3G29670	-0.601656	-0.569469	-0.217763	-1.34729	0.256627	0.64052	-0.521196
AT1G30240	0.165782	-0.195404	-0.756642	-0.920787	0.329381	-0.593042	-0.396002
AT3G19780	0.200748	-0.306873	-0.671411	-1.45916	0.586981	-0.285177	-0.565311
AT3G47700	0.381459	-0.0714276	0.0139003	-1.08862	0.147313	-0.220245	-0.869881
AT4G11370	0.404072	0.3239	0.438976	0.876605	0.577788	0.612692	1.13049
AT1G29820	-0.0197613	-0.234318	-0.41122	-0.768605	0.26082	-0.130639	-0.273468
AT3G58930	-0.552735	0.0101079	-0.417423	0.0853788	0.0710486	0.20636	0.146319
AT1G48598	0.396713	0.526582	-1.08788	-1.08698	0.945017	-0.53958	-0.668546
AT4G22530	0.635577	0.454942	0.321861	0.00445011	0.307713	-0.00600286	-0.142778
AT5G27650	0.0403451	-0.468598	-0.462604	-2.12361	0.560852	0.0579024	-1.09416
AT3G16130	-0.107184	0.0080414	-0.151225	0.27176	-0.0482298	-0.0922706	0.215489
AT2G43440	-0.0360549	-0.161569	0.155782	0.395888	-0.678776	-0.48694	-0.12132
AT5G40920	0.472989	0.179396	0.257558	-0.533437	0.235317	0.0198857	-0.477516
AT2G42290	-0.204955	-0.250716	-0.286667	-0.54721	-0.0686541	-0.150365	-0.365148
AT4G35500	1.60658	0.987458	1.01194	0.884485	0.12262	-0.47202	0.019647
AT1G50360	0.683964	-0.0393543	-0.04404	-0.734717	0.494448	-0.233556	-0.200915
AT5G22760	0.371502	-0.447036	-0.518744	-1.8234	0.742943	-0.147303	-0.633416
AT2G20815	0.293673	0.131049	-0.297735	-0.327991	0.16135	-0.430059	-0.29769
AT3G11600	-0.357872	-0.0836639	-0.650816	-0.143146	0.4715	0.178556	0.412018
AT5G43130	0.0138493	-0.543247	-0.636376	-1.52845	0.675026	0.0248001	-0.310181
AT1G24400	-0.261457	-0.141446	-0.441046	-0.489779	0.111468	-0.0681208	-0.236865
AT5G47960	2.1037	2.11463	2.19158	2.34757	0.0792391	0.167116	0.312175
AT5G40400	-0.466368	-0.175417	-0.459326	-0.107759	0.0493747	0.0564169	0.117033
AT4G36290	0.31884	-0.34987	-0.53944	-1.55534	0.453279	-0.405	-0.752195
AT1G09750	-0.842894	-0.196121	-0.928561	-0.294774	0.0294655	-0.0562019	-0.0691874
AT3G58850	-1.13152	-0.144032	-1.26793	-0.00972956	0.288219	0.15181	0.422522
AT1G07119	-0.578632	-0.349652	-0.0227117	0.118045	-0.609449	-0.0535291	-0.141752
AT3G58110	0.610663	-0.340413	-0.694256	-1.87122	0.960151	-0.344768	-0.570653
AT5G01830	1.09791	1.06913	0.655101	0.674877	0.0797663	-0.363046	-0.314483
AT5G13870	-0.0489926	0.0125424	-0.561132	-0.29059	0.29081	-0.221329	-0.0123219
AT4G21310	0.355353	0.158833	0.0442805	0.893199	-0.124321	-0.435393	0.610045
AT2G28870	-0.760475	-0.397774	-0.346453	0.219415	-0.102731	0.311292	0.514458
AT3G57140	-0.128527	0.454348	0.0580106	0.603688	-0.106793	0.0797447	0.042547
AT3G13780	-0.0299869	-0.201761	-0.533866	-0.897177	0.504431	0.000551798	-0.190986
AT4G01910	0.269456	-0.0548164	0.203081	0.00964444	-0.0351797	-0.101555	0.0292811
AT3G53190	-0.155792	0.155715	-0.451643	-0.0610947	0.108999	-0.186852	-0.107811
AT3G60390	-0.95428	-0.539047	-0.357926	-0.827187	0.365306	0.96166	0.0771664
AT4G22350	-0.0211608	-0.327708	-0.551871	-0.932042	0.292494	-0.238217	-0.311841
AT2G25170	0.300098	-0.639772	-0.679143	-2.0691	0.980227	0.000985761	-0.449105
AT4G37850	23.6193	22.7675	22.5208	20.6105	0	-0.0925155	-2.15703
AT4G14830	-0.442738	-0.101046	0.103239	0.27273	-0.0761706	0.469806	0.297605
AT3G22410	0.899403	0.953826	1.38186	0.954018	-0.518262	-0.0358032	-0.51807
AT4G16280	0.362264	0.0741808	-0.305682	-0.667021	0.307753	-0.360194	-0.433449
AT1G11350	-0.153816	-0.343453	-0.636447	-1.92502	0.666256	0.183625	-0.915313
AT5G09630	0.131062	-0.0280012	0.5952	0.435631	0.0332379	0.497375	0.49687
AT4G13505	1.27316	1.69903	0.401049	0.791537	0.837123	-0.0349909	-0.0703666
AT4G26255	1.88604	1.3541	2.64487	2.01684	-0.825211	-0.066385	-0.162471
AT2G24520	0.249746	-0.507008	-0.360347	-1.46991	0.409051	-0.201041	-0.553846
AT4G16480	0.313947	-0.116797	0.00494758	-0.395765	0.0645661	-0.244433	-0.214402
AT5G42360	0.128924	-0.0843696	-0.131843	-0.740147	0.526063	0.265296	-0.129714
AT3G62510	0.447561	0.718378	-0.554436	-0.625572	0.632038	-0.369959	-0.711912
AT2G38260	0.1586	-0.0917063	-0.145129	-0.381805	0.212269	-0.0914592	-0.0778289
AT1G45180	0.0914771	-0.00959798	-0.334772	-0.553337	0.322828	-0.103421	-0.220911
AT3G48500	-0.108896	-0.590506	-0.974736	-1.75547	0.777691	-0.088149	-0.387272
AT5G38780	0.45479	-0.157339	-0.455322	0.31823	0.117436	-0.792676	0.593005
AT2G39380	0.44302	0.19092	0.176547	-0.257533	0.00785052	-0.258622	-0.440602
AT1G17170	2.47726	1.00213	1.28329	1.27076	-0.308194	-1.50217	-0.0395651
AT1G27850	0.19775	-0.526868	-0.418998	-1.77461	0.621174	0.00442487	-0.626573
AT5G54520	0.0925654	-0.136729	-0.277468	-0.927829	0.230198	-0.139835	-0.560902
AT1G80070	0.20992	-0.558894	-0.901327	-2.53257	0.962911	-0.148335	-1.01076
AT5G56880	4.03201	3.6114	4.93838	3.74916	-0.259376	0.647	-0.121614
AT5G58480	-0.593658	-0.444674	-0.527912	-0.702176	0.186473	0.252219	-0.0710289
AT2G02150	-0.316889	-0.0355708	-0.443708	-0.001288	0.235366	0.108547	0.269648
AT3G56890	-0.700866	-0.386413	-0.748478	-0.0228181	0.371436	0.323825	0.735031
AT4G24200	0.797579	-0.12981	-0.168981	-1.81583	0.630502	-0.336058	-1.05552
AT2G15680	0.363213	0.829473	0.17057	1.01477	0.0749189	-0.117724	0.260212
AT2G16380	-0.321087	-0.449116	-0.779707	-1.3258	0.697864	0.239244	-0.178817
AT3G18510	-0.272253	0.0294886	0.367097	0.802889	-0.279821	0.359529	0.493579
AT1G12420	1.06352	0.289379	0.583908	-0.553177	0.477833	-0.00177962	-0.364723
AT5G45475	1.15489	0.426244	0.378059	0.724803	0.459633	-0.317201	0.758191
AT2G18260	-0.524673	-0.303904	-0.432283	-0.0749674	0.290714	0.383104	0.519651
AT5G49560	-0.417572	-0.0348322	-0.338671	0.340482	-0.378575	-0.299674	-0.00326106
AT5G27750	-0.261479	-0.244544	-0.137152	-0.12633	0.0578868	0.182214	0.176101
AT4G14920	0.00553757	-0.515145	-0.843969	-1.46334	0.698344	-0.151163	-0.249854
AT5G50330	0.852483	0.264641	0.456865	0.315366	0.196765	-0.198854	0.24749
AT5G37550	-0.340644	-0.370774	-0.262252	-0.453929	0.0359268	0.11432	-0.0472284
AT5G28442	-0.147829	0.0115501	-0.0193013	0.767655	-0.364997	-0.23647	0.391108
AT2G43310	0.152484	0.366615	0.286261	0.650447	-0.0372283	0.0965483	0.246603
AT1G61170	-0.110676	0.358074	-0.116896	-0.0461763	0.396304	0.390084	-0.00794695
AT5G13480	0.054953	-0.184028	-0.511175	-0.989697	0.408465	-0.157664	-0.397204
AT2G48160	0.244019	-0.393427	-0.620453	-2.01261	0.720405	-0.144068	-0.898782
AT4G29730	0.179321	-0.035188	-0.367214	-0.513072	0.111779	-0.434756	-0.366105
AT3G23790	0.868519	-0.110574	-0.409704	-0.813876	0.754648	-0.523575	0.0513453
AT2G29720	1.09656	1.32161	1.09331	1.63491	-0.163719	-0.166973	0.149588
AT5G60870	-0.353462	-0.00753817	-0.264939	0.393319	-0.276741	-0.188219	0.124116
AT3G27970	-0.134139	-0.634007	1.01448	1.23819	-2.17153	-1.02291	-0.299328
AT3G22380	0.205407	-0.535735	-0.549176	-2.8005	1.01268	0.258099	-1.25208
AT1G17590	0.478111	0.084827	0.230336	0.364367	0.237889	-0.00988598	0.517429
AT4G18425	0.33277	0.127579	0.0556968	0.642192	-0.0149311	-0.292004	0.499683
AT2G20550	-0.518178	-0.580196	-0.953607	-0.935954	0.477888	0.042458	0.12213
AT2G45930	2.74744	2.05787	2.23696	1.85881	0.130859	-0.379628	-0.0682026
AT2G42700	0.474173	-0.250149	-0.158693	-1.27654	0.359781	-0.273085	-0.666608
AT1G53540	2.39226	1.87093	4.18938	1.63523	0.143181	1.94029	-0.0925252
AT1G13740	-0.0361035	-0.262	-0.321525	-0.190649	0.111067	-0.174354	0.182418
AT4G25730	0.503497	-0.121246	-0.64266	-1.90185	1.07762	-0.0685405	-0.702989
AT3G10690	-0.407263	-0.530016	-0.485043	-0.797499	0.140312	0.0625323	-0.127171
AT2G28660	0.156423	0.672785	0.521088	0.725731	-0.194142	0.170523	-0.141196
AT3G22430	0.516132	-0.206017	-0.224125	-1.15061	0.49274	-0.247517	-0.451856
AT1G78050	-0.347481	-0.329786	-0.349478	-0.229685	0.233591	0.231595	0.333692
AT4G05040	-0.0325362	-0.399991	-0.633202	-1.39002	0.406583	-0.194082	-0.583447
AT2G01660	-0.125842	0.16281	-0.0826018	0.135037	-0.194785	-0.151545	-0.222558
AT2G46890	-0.44398	0.126117	-0.35	0.710674	-0.114457	-0.0204775	0.4701
AT1G21700	0.271139	-0.354353	-0.455341	-1.70925	0.628643	-0.0978375	-0.726254
AT3G53690	0.321753	0.602987	0.021444	0.516965	-0.0428574	-0.343166	-0.12888
AT5G08470	0.158487	-0.180965	-0.351697	-1.48869	0.513179	0.00299525	-0.794541
AT5G09580	0.0184808	0.248098	-0.027634	0.43129	-0.0338632	-0.0799779	0.149329
AT3G62200	0.468474	0.0534014	-0.324226	-1.72788	0.56196	-0.23074	-1.21932
AT2G17880	-0.30111	-0.0482689	0.171511	-0.0686464	0.301425	0.774046	0.281048
AT1G73400	-0.271289	-0.429334	-0.31925	-0.526122	0.409847	0.361887	0.31306
AT5G07970	0.569174	-0.338757	-0.561745	-1.8226	0.546574	-0.584345	-0.937274
AT3G11240	0.130733	-0.220917	-0.192349	-1.05651	0.379945	0.0568637	-0.455648
AT4G26795	-0.308115	-0.0286799	-0.642724	-0.148332	0.347385	0.0127761	0.227733
AT1G17110	0.711713	-0.42473	-0.540428	-2.02072	1.02416	-0.227979	-0.571829
AT1G36160	0.405872	-0.478943	-0.601811	-2.48529	0.847509	-0.160174	-1.15883
AT3G04340	-0.128965	-0.760021	-0.929021	-2.24112	0.820972	0.0209155	-0.660128
AT3G56408	0.241135	-0.546265	-0.615552	-1.10663	0.0485065	-0.80818	-0.511859
AT4G37970	0.254614	-0.306073	-0.0186714	-0.347421	-0.255438	-0.528723	-0.296786
AT5G64905	4.40868	3.58292	5.86106	5.72522	-0.614517	0.837868	1.52779
AT5G18360	0.378051	0.162348	0.323764	-0.290645	0.278801	0.224514	-0.174192
AT1G31870	0.256979	-0.467976	-0.68248	-1.81082	0.720394	-0.219065	-0.622451
AT2G19670	-0.826716	-0.582859	-0.741886	-0.344066	0.300334	0.385164	0.539127
AT2G33815	-0.27434	0.374074	-0.143099	-0.289978	0.338641	0.469882	-0.325411
AT1G11960	0.524986	0.00941101	-0.369045	-0.995211	0.434075	-0.459956	-0.570546
AT1G51890	4.39439	2.85973	4.59919	3.32959	-0.153875	0.0509255	0.31599
AT5G22520	2.2705	2.65568	2.58432	2.93997	0.200547	0.514366	0.484842
AT5G47750	0.260276	-0.173608	-0.542407	-1.50569	0.577463	-0.22522	-0.754619
AT1G26620	0.499508	-0.34959	-0.274246	-0.989081	0.484599	-0.289155	-0.154892
AT2G38570	-0.504039	-0.0761609	-0.175126	0.307924	-0.113357	0.215555	0.270727
AT1G63420	-0.0809653	-0.47934	-0.297419	-0.201821	-0.108477	-0.324931	0.169041
AT5G43620	0.47417	0.665348	0.603216	0.712207	0.172086	0.301132	0.218945
AT2G15890	-0.567003	-0.396079	0.158614	0.231451	1.2669	1.99252	1.89443
AT1G18265	-0.788209	-0.323572	-0.630167	0.311548	0.114013	0.272054	0.749134
AT1G20840	0.876308	0.0826619	-0.526639	-1.80507	0.957919	-0.445027	-0.92981
AT1G65480	1.77603	-0.351747	1.42726	1.987	0.287631	-0.0611384	2.62638
AT5G45840	0.0528886	0.141672	-0.259337	0.303985	0.205223	-0.107003	0.367536
AT5G17930	0.129007	-0.430086	-0.65932	-1.36063	0.710473	-0.0778544	-0.22007
AT5G09930	0.340054	-0.341245	-0.819403	-0.855613	0.483672	-0.675785	-0.0306961
AT2G29410	-0.182262	-0.293455	-0.42947	-0.318869	0.215844	-0.0313628	0.190431
AT1G18870	0.232054	-0.277908	0.276401	-1.22853	0.10973	0.154077	-0.840895
AT3G56480	0.33192	0.181128	-0.353382	-1.03483	0.517223	-0.168079	-0.69874
ATMG00020	-0.0538297	-0.122914	-0.573125	-1.03589	0.4406	-0.0786946	-0.472375
AT4G35430	0.0111356	-0.0309536	-0.831825	-1.7057	0.715368	-0.127593	-0.95938
AT5G62580	-0.354877	-0.391421	-0.487474	-1.10716	0.0552486	-0.0773493	-0.66049
AT4G21440	1.03876	0.223731	1.26309	0.303279	-0.17465	0.0496786	-0.095102
AT2G16920	0.556515	-0.296126	-0.46316	-1.66802	0.762549	-0.257125	-0.609345
AT1G06475	0.799275	0.897653	1.45996	1.50437	-0.174846	0.485843	0.431871
AT4G11670	0.704046	0.175945	0.128543	-0.760813	0.348802	-0.226701	-0.587956
AT4G32890	-0.794934	-0.110722	-0.272143	0.347203	-0.332203	0.190587	0.125722
AT3G05660	1.12642	0.879011	0.787032	0.248559	-0.287511	-0.626897	-0.917962
AT3G08000	-0.572371	0.0808252	-0.11013	0.368378	-0.19561	0.266631	0.0919426
AT5G06810	0.261347	0.27956	0.0825565	0.18602	0.12383	-0.0549597	0.0302909
AT5G18440	0.303961	-0.427363	-0.7939	-1.25039	0.71633	-0.381532	-0.106701
AT3G13560	-0.108704	-0.0566933	-0.197173	-0.624142	0.0046148	-0.0838538	-0.562834
AT4G38300	-0.00799629	-0.0536038	-0.198739	-0.591852	-0.117074	-0.307817	-0.655323
AT3G59430	0.156206	-0.128059	-0.409526	-0.69561	0.30609	-0.259643	-0.261461
AT2G32030	2.41635	2.45573	2.26195	2.54714	0.00781351	-0.146586	0.0992203
AT1G70740	0.495685	-0.0310136	0.0245876	-1.1959	0.227781	-0.243317	-0.937105
AT3G59330	0.0819561	0.0262298	-0.39584	-0.112765	0.251601	-0.226195	0.112607
AT5G40540	-0.229846	0.396233	0.45647	1.22201	-0.451661	0.234655	0.374114
AT5G46280	-0.124595	-0.340799	-0.295066	-0.843906	0.381286	0.210815	-0.121822
AT3G22070	0.0843692	0.257155	0.20496	0.342877	-0.103832	0.0167593	-0.0181096
AT2G19990	3.79416	3.55997	1.63409	1.22816	-0.063445	-2.22351	-2.39525
AT5G17580	-0.245998	-0.634411	-0.556547	-0.55667	0.28397	-0.0265794	0.361711
AT5G57070	-0.0147524	0.183483	-0.230351	0.151275	0.0279321	-0.187666	-0.00427607
AT3G50340	0.173169	0.167842	0.243189	-0.242654	0.0826218	0.152642	-0.327874
AT2G16640	0.0816964	-0.357089	-0.497754	-1.31116	0.669963	0.0905126	-0.284103
AT1G49430	-1.18049	-0.571526	-1.18456	-0.727275	-0.0305847	-0.03465	-0.186334
AT1G25390	0.685828	-0.476253	-0.449175	-1.83542	0.741599	-0.393404	-0.617572
AT5G06300	0.33562	0.523165	-0.0989706	0.180673	0.331469	-0.103122	-0.0110229
AT5G44306	1.07556	-0.587888	0.0521699	2.61971	-0.702055	-1.72544	2.50555
AT2G32410	0.0107984	-0.148066	-0.372853	-0.432112	0.167121	-0.216531	-0.116925
AT2G22650	-0.303562	0.0389517	-0.250666	0.101463	-0.0601611	-0.00726507	0.00235046
AT5G55570	-1.8627	-0.498143	-1.59241	-0.539501	0.377814	0.648111	0.336455
AT3G09650	-0.203987	-0.483654	-0.764071	-2.15384	0.513713	-0.0463709	-1.15647
AT2G38460	-0.386269	-0.354628	-0.626745	-0.180426	-0.0222735	-0.26275	0.151929
AT3G50590	0.450229	-0.39557	-0.551196	-2.39923	0.961395	-0.0400298	-1.04226
AT1G03960	0.116754	-0.133601	-0.0814941	-0.286139	0.0209221	-0.177326	-0.131616
AT5G27970	0.318356	-0.26979	-0.297605	-1.51378	0.415068	-0.200892	-0.828926
AT5G56780	-0.441287	-0.205801	-0.472734	-0.665071	0.44546	0.414013	-0.0138109
AT3G19360	0.0946953	0.266543	-0.0524796	0.152075	0.285379	0.138204	0.170911
AT1G19835	0.426818	-0.926638	-0.949659	-2.20846	1.07548	-0.300995	-0.206336
AT1G71020	-0.0926415	-0.588798	-0.235654	-1.38318	0.599785	0.456772	-0.194597
AT3G52900	-0.467845	-0.592126	-0.17194	-0.373084	0.0102087	0.306114	0.22925
AT5G08270	-0.311894	-0.414906	-0.427075	-0.732482	0.0654637	-0.0497181	-0.252112
AT5G17270	0.335313	-0.258228	-0.585568	-1.51665	0.799108	-0.121773	-0.459314
AT5G65120	-0.171071	-0.125523	0.0445873	0.450382	-0.0504625	0.165196	0.525443
AT5G10330	-0.322371	-0.23451	0.0237731	0.104312	-0.181591	0.164554	0.157231
AT5G65560	0.277478	-0.060811	-0.080517	-0.497966	0.273868	-0.0841274	-0.163287
AT2G18010	-0.303436	-0.184925	0.0426786	0.498404	-0.118449	0.227666	0.564881
AT2G21100	2.99901	1.47092	4.00257	2.2421	-1.82299	-0.819427	-1.0518
AT5G61380	0.938214	0.403448	0.848642	0.28008	0.133667	0.044095	0.0102994
AT4G15810	-0.0598941	-0.654248	-0.648166	-1.35964	0.604171	0.0158987	-0.101223
AT3G63200	-1.42437	-0.340281	-0.612597	0.244647	-0.11906	0.692716	0.465868
AT3G63290	0.183613	-0.198917	-0.157483	-0.504297	-0.0848091	-0.425905	-0.390189
AT4G28320	0.268177	0.0710443	0.0341553	0.0316399	0.155311	-0.0787106	0.115906
AT1G67530	0.479407	-0.434057	-0.335476	-1.82133	0.593428	-0.221455	-0.793848
AT4G16470	-0.23105	-0.139605	-0.24062	0.0411047	0.243724	0.234153	0.424433
[truncated: 15,154 more rows]
