# Supplementary material for: Molecular Matchmakers: Phytoplasma Effector SAP54 Targets MADS-Box Factor SVP to Enhance Attraction of Fecund Female Vectors by Modulating Leaf Responses to Male Presence
Source: bioRxiv preprint, doi:10.1101/2024.05.09.593434, version 2 (2024-09-18)
Supplement: Supplementary file 9 [file 593434_file27.xlsx]

## Sheet: Title Page + legend
Supplementary Table 9: Fold-change of leaf MTFs in insect exposed GFP and SAP54 plants.
Tab A: List of 20 leaf expressed MTFs and their fold change in insect exposed SAP54 and GFP plants
Tab B: List of 107 MTF identifiers in A.thaliana (de Folter et al., 2005)
Tab C: log2 Fold changes for the list of 17'153 transcripts that demonstrate expression value ≥ 1 FRKM in any of the treatments and include all DEGs.

## Sheet: A
Supplementary Table 9: Fold-change in expression levels of MADS-box transcription factor genes in leaves with or without SAP54 and male/female leafhoppers
Only MADS-box transcription factor genes expressed in leaves at ≥ 1 FRKM in any of the treatments are shown; genes for which mutants showed female preference for male-exposed leaves are highlighted in yellow
		Insect exposure only		SAP54 only	Combined insect exposure and SAP54 presence
Gene ID	Gene name	Female vs cage GFP	Male vs cage GFP	Cage SAP54 vs Cage GFP	Female vs cage SAP54	Male vs cage SAP54	Female SAP54 vs Female GFP	Male SAP54 vs Male GFP
AT5G48670	AGL80	0.316894	0.461328	0.18187	0.147478	0.507079	0.0124528	0.22762
AT1G22590	AGL87	-1.40792	-0.328385	0.132316	-1.06583	0.184147	0.474403	0.644848		Colour code:
AT2G34440	AGL29	0.0877267	-0.318043	0.0468054	-0.0279864	0.00729753	-0.0689078	0.372145		red	upregulated
AT5G60440	AGL62	1.08595	0.924029	-0.339697	1.40016	1.40943	-0.0254895	0.145707		green	downregulated
AT1G18750	AGL65	-0.164969	-0.134524	0.0556618	-0.483844	-0.552498	-0.263213	-0.362313
AT2G03060	AGL30	0.343917	-0.0996562	0.16723	0.126824	-0.468508	-0.0498618	-0.201621
AT1G77080	MAF1	-0.0122042	0.136315	-0.385123	0.394232	0.756575	0.0213132	0.235137
AT5G65050	MAF2	0.222415	0.0699162	-0.0114194	0.129299	-0.161133	-0.104536	-0.242468
AT5G65060	MAF3	0.191859	-0.0581935	-0.0295273	0.145875	-0.222153	-0.0755117	-0.193487
AT5G65070	MAF4	0.208085	0.604195	-0.418428	1.48269	0.358934	0.856179	-0.663689
AT5G65080	MAF5	0.470901	-1.63226	0.069918	3.2611	2.08341	2.86011	3.78559
AT2G03710	SEP4	-0.0837757	-0.281483	0.0732479	-0.148986	-0.524532	0.00803782	-0.1698
AT5G60910	FUL	0.316994	0.38124	0.14962	0.279088	0.315781	0.111714	0.0841605
AT4G22950	AGL19	0.213454	0.15007	-0.0876934	0.868944	0.893319	0.567797	0.655556
AT2G45660	SOC1	0.201181	0.0552926	0.0464021	0.583948	0.914248	0.429169	0.905358
AT3G57230	AGL16	0.306065	0.324929	-0.10422	0.482103	0.532304	0.0718189	0.103156
AT3G57390	AGL18	0.239416	0.390336	0.116694	0.0452038	0.317097	-0.0775186	0.0434549
AT4G24540	AGL24	-0.3042	-0.114813	0.00548695	0.21783	0.441145	0.527516	0.561445
AT2G22540	SVP	-0.49564	-0.119775	-0.322932	0.0606178	0.324631	0.233326	0.121474
AT5G26880	AGL26	-0.501218	0.0125251	-0.12376	-0.521967	0.222125	-0.144508	0.0858399

## Sheet: B
107 MTFs	TAIR 10 Gene Model Description
AT1G77080	MADS domain protein MAF1 - flowering regulator that is closely related to FLC. Deletion of this locus in Nd ecotype is correlated with earlier flowering in short days suggesting function as a negative regulator of flowering.
AT1G18750	Encodes a member of the MIKC (MADS box, Keratin binding domain, and C terminal domain containing )family of transcriptional regulators. AGL65 is expressed in pollen.It forms heterodimers with other MICK family members (AGL104). Involved in late stages of pollen development and pollen tube growth.
AT2G14210	MADS box gene, transcription factor
AT5G13790	AGL15 (AGAMOUS-Like 15) is a member of the MADS domain family of regulatory factors. Although AGL15 is preferentially expressed during embryogenesis, AGL15 is also expressed in leaf primordia, shoot apical meristems and young floral buds, suggesting that AGL15 may play a role during post-germinative development. Transgenic plants that ectopically express AGL15 show delays in the transition to flo…
AT3G58780	One of two genes (SHP1 and SHP2) that are required for fruit dehiscence. The two genes control dehiscence zone differentiation and promote the lignification of adjacent cells.
AT1G69540	Encodes a member of the MIKC (MADS box, Keratin binding domain, and C terminal domain containing )family of transcriptional regulators.
AT5G23260	Encodes a MADS box protein. Regulates proanthocyanidin biosynthesis in the inner-most cell layer of the seed coat. Also controls cell shape of the inner-most cell layer of the seed coat. Also shown to be necessary for determining the identity of the endothelial layer within the ovule. Paralogous to GOA. Plays a maternal role in fertilization and seed development.
AT4G18960	AGAMOUS (AG)
AT1G17310	AGAMOUS-LIKE 100 (AGL100)
AT5G27050	AGAMOUS-LIKE 101 (AGL101)
AT1G47760	AGAMOUS-LIKE 102 (AGL102)
AT3G18650	AGAMOUS-LIKE 103 (agl103)
AT1G22130	AGAMOUS-LIKE 104 (AGL104)
AT5G37415	AGAMOUS-LIKE 105 (AGL105)
AT1G71692	XAANTAL1 (XAL1);AGAMOUS-LIKE 12 (AGL12)
AT3G61120	AGAMOUS-LIKE 13 (AGL13)
AT4G11880	AGAMOUS-LIKE 14 (AGL14);XAANTAL2 (XAL2)
AT3G57230	AGAMOUS-LIKE 16 (AGL16)
AT2G22630	AGAMOUS-LIKE 17 (AGL17)
AT3G57390	AGAMOUS-LIKE 18 (AGL18)
AT4G22950	AGAMOUS-LIKE 19 (AGL19)
AT2G45660	AGAMOUS-LIKE 20 (AGL20);SUPPRESSOR OF OVEREXPRESSION OF CO 1 (SOC1);SUPPRESSOR OF OVEREXPRESSION OF CO 1 (ATSOC1)
AT4G37940	AGAMOUS-LIKE 21 (AGL21)
AT1G65360	AGAMOUS-LIKE 23 (AGL23)
AT4G24540	AGAMOUS-LIKE 24 (AGL24)
AT5G26880	AGAMOUS-LIKE 26 (AGL26)
AT1G01530	AGAMOUS-LIKE 28 (AGL28)
AT2G34440	AGAMOUS-LIKE 29 (AGL29)
AT2G03060	AGAMOUS-LIKE 30 (AGL30)
AT5G65050	MADS AFFECTING FLOWERING 2 (MAF2);AGAMOUS-LIKE 31 (AGL31)
AT2G26320	AGAMOUS-LIKE 33 (AGL33)
AT5G26630	AGAMOUS-LIKE 35 (AGL35)
AT5G26650	AGAMOUS-LIKE 36 (AGL36)
AT1G65300	AGAMOUS-LIKE 38 (AGL38);PHERES2 (PHE2)
AT5G27130	AGAMOUS-LIKE 39 (AGL39)
AT4G36590	AGAMOUS-LIKE 40 (AGL40)
AT2G26880	AGAMOUS-LIKE 41 (AGL41)
AT5G40220	AGAMOUS-LIKE 43 (AGL43)
AT3G05860	AGAMOUS-LIKE 45 (AGL45)
AT2G28700	AGAMOUS-LIKE 46 (AGL46)
AT5G55690	AGAMOUS-LIKE 47 (AGL47)
AT2G40210	AGAMOUS-LIKE 48 (AGL48)
AT1G60040	AGAMOUS-LIKE 49 (AGL49)
AT1G59810	AGAMOUS-LIKE 50 (AGL50)
AT4G02235	AGAMOUS-LIKE 51 (AGL51)
AT4G11250	AGAMOUS-LIKE 52 (AGL52)
AT5G27070	AGAMOUS-LIKE 53 (AGL53)
AT5G27090	AGAMOUS-LIKE 54 (AGL54)
AT1G60920	AGAMOUS-LIKE 55 (agl55)
AT3G04100	AGAMOUS-LIKE 57 (AGL57)
AT1G28450	AGAMOUS-LIKE 58 (AGL58)
AT1G28460	AGAMOUS-LIKE 59 (AGL59)
AT2G45650	AGAMOUS-LIKE 6 (AGL6);REDUCED SHOOT BRANCHING 1 (RSB1)
AT1G72350	AGAMOUS-LIKE 60 (AGL60)
AT2G24840	AGAMOUS-LIKE 61 (AGL61);DIANA (DIA)
AT5G60440	AGAMOUS-LIKE 62 (AGL62)
AT1G29962	AGAMOUS-LIKE 64 (AGL64)
AT1G77980	AGAMOUS-LIKE 66 (AGL66)
AT1G77950	AGAMOUS-LIKE 67 (AGL67)
AT5G51870	(FYL1);AGAMOUS-LIKE 71 (AGL71)
AT5G51860	(FYL2);AGAMOUS-LIKE 72 (AGL72)
AT5G38620	AGAMOUS-LIKE 73 (AGL73)
AT1G48150	AGAMOUS-LIKE 74 (AGL74)
AT5G41200	AGAMOUS-LIKE 75 (AGL75)
AT5G40120	AGAMOUS-LIKE 76 (AGL76)
AT5G38740	AGAMOUS-LIKE 77 (AGL77)
AT5G65330	AGAMOUS-LIKE 78 (AGL78)
AT3G30260	AGAMOUS-LIKE 79 (AGL79)
AT5G60910	FRUITFULL (FUL);AGAMOUS-LIKE 8 (AGL8)
AT5G48670	(FEM111);AGAMOUS-LIKE 80 (AGL80)
AT5G39750	AGAMOUS-LIKE 81 (AGL81);EMBRYO DEFECTIVE 3008 (EMB3008)
AT5G58890	AGAMOUS-LIKE 82 (AGL82)
AT5G49490	AGAMOUS-LIKE 83 (AGL83)
AT5G49420	AGAMOUS-LIKE 84 (AGL84)
AT1G54760	AGAMOUS-LIKE 85 (AGL85)
AT1G31630	AGAMOUS-LIKE 86 (AGL86)
AT1G22590	AGAMOUS-LIKE 87 (AGL87)
AT2G11990	AGAMOUS-LIKE 88 (AGL88)
AT5G27580	AGAMOUS-LIKE 89 (AGL89)
AT5G27960	AGAMOUS-LIKE 90 (AGL90)
AT3G66656	AGAMOUS-LIKE 91 (AGL91)
AT1G31640	AGAMOUS-LIKE 92 (AGL92)
AT5G26950	AGAMOUS-LIKE 93 (AGL93)
AT2G15660	AGAMOUS-LIKE 95 (AGL95)
AT5G06500	AGAMOUS-LIKE 96 (AGL96)
AT1G46408	AGAMOUS-LIKE 97 (AGL97)
AT5G39810	AGAMOUS-LIKE 98 (AGL98)
AT5G04640	AGAMOUS-LIKE 99 (AGL99)
AT5G26580	AGAMOUS-LIKE-34 (AGL34)
AT1G60880	AGAMOUS-LIKE-56 (AGL56)
AT3G54340	(ATAP3);APETALA 3 (AP3)
AT1G69120	APETALA1 (AP1);AGAMOUS-LIKE 7 (AGL7); (ATAP1)
AT1G26310	CAULIFLOWER (CAL); (CAL1);AGAMOUS-LIKE 10 (AGL10)
AT5G10140	FLOWERING LOCUS C (FLC);REDUCED STEM BRANCHING 6 (RSB6);AGAMOUS-LIKE 25 (AGL25);FLOWERING LOCUS F (FLF)
AT1G31140	GORDITA (GOA)
AT5G65060	AGAMOUS-LIKE 70 (AGL70);MADS AFFECTING FLOWERING 3 (MAF3); (FCL3)
AT5G65070	MADS AFFECTING FLOWERING 4 (MAF4)
AT5G65080	AGAMOUS-LIKE 68 (AGL68);MADS AFFECTING FLOWERING 5 (MAF5)
AT1G65330	PHERES1 (PHE1);AGAMOUS-LIKE 37 (AGL37)
AT5G20240	PISTILLATA (PI)
AT4G09960	SEEDSTICK (STK)
AT3G02310	SEPALLATA 2 (SEP2);AGAMOUS-LIKE 4 (AGL4)
AT2G03710	AGAMOUS-LIKE 3 (AGL3);SEPALLATA 4 (SEP4)
AT5G15800	AGAMOUS-LIKE 2 (AGL2);SEPALLATA1 (SEP1)
AT1G24260	SEPALLATA3 (SEP3);AGAMOUS-LIKE 9 (AGL9)
AT2G42830	SHATTERPROOF 2 (SHP2);AGAMOUS-LIKE 5 (AGL5)
AT2G22540	SHORT VEGETATIVE PHASE (SVP);AGAMOUS-LIKE 22 (AGL22);FLOWERING ARABIDOPSIS QTL1 (FAQ1)

## Sheet: C
	log2 (fold changes)
GeneID	F_N_GFP	M_N_GFP	F_N_SAP54	M_N_SAP54	SAP_GFP_N	SAP_GFP_F	SAP_GFP_M			F_N_GFP	females on 35S:GFP plants vs no-insect 35S:GFP plants
AT3G48550	-1.68547	-0.705203	-1.54576	-0.225527	0.152961	0.292667	0.632637			F_N_SAP	females on 35S:GFP-SAP54 plants vs no-insect 35S:GFP-SAP54 plants
AT1G16640	-0.159871	0.0989742	0.00155709	0.88339	-0.270087	-0.108659	0.514329			M_N_GFP	males on 35S:GFP plants vs no-insect 35S:GFP plants
AT4G01680	-0.460242	0.546872	-1.07544	0.781638	0.516012	-0.0991828	0.750778			M_N_SAP	males on 35S:GFP-SAP54 plants vs no-insect 35S:GFP-SAP54 plants
AT3G25250	2.99078	2.14348	1.81984	0.852889	0.339168	-0.831772	-0.951424			SAP_GFP_N	no insect 35S:GFP-SAP54 plants vs no-insect 35S:GFP plants
AT1G50910	-0.176298	-0.151965	-0.595285	-1.13796	0.398857	-0.0201303	-0.587138			SAP_GFP_F	female 35S:GFP-SAP54 plants vs female 35S:GFP plants
AT5G03700	0.0832695	0.2004	-0.0904972	0.128632	0.37649	0.202723	0.304722			SAP_GFP_M	male 35S:GFP-SAP54 plants vs male 35S:GFP plants
AT2G45100	-0.896217	-0.615424	-0.801503	-0.962513	0.217909	0.312623	-0.129179
AT5G45140	0.0254526	-0.761508	-0.732317	-1.7049	0.796917	0.0391472	-0.146478
AT1G30720	1.47633	0.737145	0.779583	0.324799	0.739823	0.0430774	0.327477
AT2G05160	-0.496523	-0.541987	-0.217058	-0.683001	-0.0625162	0.216948	-0.20353
AT2G28590	-0.239226	0.057388	-0.266648	0.254962	-0.0465101	-0.073932	0.151064
AT5G67470	0.654833	0.242469	0.0251446	-0.922786	0.434045	-0.195643	-0.73121
AT1G01760	0.0248596	-0.14951	-0.207954	-0.587022	0.350087	0.117273	-0.0874251
AT2G34140	2.58938	2.29289	0.263231	1.36702	0.756966	-1.56918	-0.168906
AT3G48150	-0.593403	-0.48228	-0.624258	-0.847036	0.0258805	-0.00497435	-0.338875
AT1G61280	-0.109627	0.386228	-0.631848	-0.130847	0.400147	-0.122074	-0.116928
AT5G61160	2.5589	1.93543	2.21981	1.95486	0.389777	0.0506886	0.409207
AT5G05680	0.139792	-0.578455	-0.55837	-1.57508	0.508917	-0.189245	-0.48771
AT5G28262	0.250393	0.0213121	0.0239672	0.292887	0.284528	0.0581031	0.556104
AT1G68725	0.761083	0.36879	0.185561	0.612057	-0.213925	-0.789448	0.029341
AT5G10260	-0.569748	0.0656067	-0.441844	0.596205	0.204898	0.332801	0.735497
AT2G05950	0.773524	0.0236001	-0.745849	0.266686	0.551708	-0.967665	0.794794
AT3G01750	0.724319	-0.171817	0.00322625	-1.28081	0.402123	-0.318969	-0.706871
AT1G52990	-0.502892	-0.417782	0.020157	0.429271	-0.381246	0.141802	0.465807
AT3G47890	0.550136	-0.332766	-0.689713	-2.065	1.04278	-0.197067	-0.689449
AT2G45685	1.77283	2.09028	-0.0466651	-0.348517	1.18787	-0.631623	-1.25093
AT3G60220	-0.920672	-0.00763697	-0.833748	0.145777	-0.153699	-0.0667755	-0.000285304
AT5G50090	-0.837236	-0.656388	-0.29586	-0.180835	0.148195	0.68957	0.623748
AT5G11020	-0.610686	-0.304958	-0.7279	-0.285868	0.224051	0.106837	0.243141
AT5G42040	-0.508204	-0.216175	-0.455152	0.122825	-0.125675	-0.0726219	0.213326
AT4G36030	0.379043	-0.357307	-0.0618294	-0.997031	0.22155	-0.219322	-0.418173
AT2G40711	-0.0197734	0.116472	0.00100723	0.14388	0.101012	0.121792	0.128419
AT3G20490	0.868912	0.310851	0.0106157	-0.464128	0.173562	-0.684734	-0.601417
AT5G47800	-0.284061	-0.547827	-0.421754	-1.26175	-0.201421	-0.339114	-0.915346
AT3G28925	1.77959	1.34658	2.04076	2.20832	-0.98698	-0.725809	-0.125236
AT1G15480	0.0836049	-0.304064	-0.628449	-1.61691	0.567365	-0.144688	-0.745483
AT5G13830	-0.404932	-0.391525	-0.786123	0.0189559	0.0765419	-0.304649	0.487023
AT3G09375	0.191385	-0.111732	-0.176208	-0.445151	0.0945866	-0.273006	-0.238833
AT1G70020	0.168981	0.233834	0.239728	0.83734	0.118579	0.189326	0.722085
AT5G09976	0.47645	0.471151	0.10256	0.227848	0.109184	-0.264705	-0.134119
AT5G23000	3.28231	0.657698	6.66408	4.79225	-3.37467	0.00710606	0.759882
AT1G58250	0.335968	-0.487755	-0.624968	-1.85667	0.924037	-0.036899	-0.444876
AT1G09680	0.430855	0.011641	0.538164	0.17147	0.0196244	0.126933	0.179453
AT3G07210	0.234314	-0.605245	-0.408051	-1.16432	0.282876	-0.35949	-0.276196
AT5G63550	-0.329216	-0.823106	-0.741207	-1.49567	0.496866	0.0848752	-0.175701
AT4G38560	2.47696	1.94087	1.30682	-0.136787	0.787481	-0.382657	-1.29018
AT1G78090	-1.2013	-0.349823	-0.932629	-0.00810016	0.0665853	0.335258	0.408308
AT1G02050	0.127972	-0.336238	-0.783787	-1.39819	0.573224	-0.338535	-0.488729
AT4G31890	-0.56032	-0.356083	-0.455108	-1.02218	0.293393	0.398605	-0.3727
AT2G25460	2.73901	2.1503	2.55709	1.48891	-0.162759	-0.34467	-0.824151
AT1G61500	0.0321736	-0.353798	-0.327132	-0.972698	0.3922	0.032895	-0.2267
AT3G10070	0.133842	-0.0244291	-0.39186	-1.3142	0.38602	-0.139682	-0.903752
AT3G07980	0.437474	-0.288368	-0.226901	-1.50933	0.446855	-0.21752	-0.774103
AT1G19950	-0.639106	-0.644228	-0.777079	-1.41343	0.552414	0.414442	-0.216793
AT3G54930	-0.651651	-0.653732	-0.0703394	-0.29276	-0.327939	0.253372	0.0330327
AT3G54180	0.195657	0.73674	0.574799	1.26699	-0.419238	-0.0400969	0.111007
AT5G59680	0.938863	0.499134	0.356634	-1.20267	0.993371	0.411141	-0.708432
AT5G65180	0.267999	-0.232812	-0.728844	-1.43267	0.742887	-0.253956	-0.456966
AT4G20910	0.0520257	-0.48298	-0.564055	-1.74595	0.508276	-0.107805	-0.754692
AT1G17850	-0.68459	-1.09118	-1.25878	-1.61467	0.339717	-0.234475	-0.183774
AT2G36307	0.219275	0.74239	0.470084	0.483784	0.431733	0.682542	0.173127
AT3G20340	1.90802	1.85503	0.838206	1.18093	0.661056	-0.408759	-0.0130458
AT1G61690	0.655543	-0.447306	-0.253148	-2.28577	0.80095	-0.10774	-1.03751
AT1G17560	-0.555832	-0.290481	-0.933208	-0.0145251	0.323049	-0.0543261	0.599005
AT2G41830	0.385051	-0.267852	-0.530274	-1.09714	0.589994	-0.325331	-0.239294
AT5G02400	0.186579	-0.564617	-0.577724	-0.845378	0.262454	-0.501849	-0.018306
AT1G11520	0.530711	0.0306464	-0.383262	-1.02183	0.704395	-0.209578	-0.348077
AT1G61260	0.0406257	0.450692	-0.188276	0.0249756	0.193862	-0.0350399	-0.231855
AT1G17580	0.173413	-0.767613	-0.76265	-2.53726	1.0698	0.133742	-0.699838
AT4G30570	0.164728	-0.044526	-0.52102	-0.529283	0.650614	-0.0351346	0.165857
AT5G02440	-0.766075	-0.493244	-0.502087	0.097543	0.0625476	0.326536	0.653335
AT1G14480	1.05079	0.24795	0.0365618	0.0492907	0.162851	-0.851377	-0.0358084
AT4G03376	-1.80715	-0.583274	21.1836	21.8973	-22.8337	1.16307	0.652937
AT5G03450	0.272375	-0.268266	-0.727577	-1.26009	0.592062	-0.40789	-0.399758
AT1G01225	-0.674996	-0.188433	-0.32253	0.18241	-0.24968	0.102786	0.121163
AT3G16980	0.592819	0.76072	0.287727	0.243191	0.469087	0.163995	-0.0484422
AT1G19340	-0.627462	-0.618348	-0.521878	-0.60464	0.148696	0.25428	0.162404
AT1G12890	1.12296	0.280868	0.985934	0.902334	-0.561226	-0.698257	0.0602401
AT1G03270	-0.436754	-0.355317	-0.631762	-0.891387	-0.0581117	-0.253119	-0.594181
AT3G60961	3.06473	2.86118	2.35985	2.32379	0.459532	-0.24535	-0.0778497
AT2G28670	0.342175	0.348568	-0.206134	-0.205543	0.198203	-0.350106	-0.355907
AT1G13940	0.320132	-0.654805	-0.357172	-2.23454	0.784377	0.107072	-0.795356
AT3G49730	-0.135295	-0.446424	-0.717274	-1.07983	0.515089	-0.0668896	-0.118318
AT1G05670	-0.0619784	-0.294386	-0.535013	-0.722626	0.353953	-0.119082	-0.0742866
AT5G23430	0.045167	-0.359488	-0.497632	-1.07733	0.354908	-0.187891	-0.362929
AT1G19025	-0.221755	-0.588585	-0.340989	-0.464123	0.240984	0.12175	0.365447
AT2G16750	-0.826315	-0.0529092	-0.470172	0.518851	0.118255	0.474399	0.690015
AT1G63295	-0.0172215	-0.377596	-0.405588	-0.0588197	0.00515983	-0.383206	0.323936
AT3G55090	-0.278695	-0.278739	-0.0138567	0.0921665	-0.59103	-0.326191	-0.220124
AT5G43840	-0.504098	0.235426	1.07686	1.96813	-1.33842	0.24254	0.394285
AT2G23620	0.607554	1.01611	0.790439	1.51547	-0.120207	0.0626788	0.379152
AT2G34780	0.182253	-0.42462	-0.625757	-1.50422	0.627548	-0.180462	-0.452054
AT5G08391	0.767593	-0.296285	0.201889	0.830788	0.273762	-0.291942	1.40083
AT2G29580	0.259964	-0.466852	-0.576322	-1.90277	0.64349	-0.192797	-0.792428
AT2G25500	0.231914	0.277327	-0.178046	0.923012	0.198652	-0.211308	0.844336
AT3G17220	1.15515	0.719451	-0.036825	-0.133687	0.721301	-0.470671	-0.131838
AT1G05800	22.1151	19.9558	3.57826	4.00918	15.9492	-2.58774	-1.00351
AT2G24870	1.01354	0.46287	0.241405	-0.0717172	0.562994	-0.209145	0.0284068
AT5G49665	-0.246836	-0.452948	-0.263626	-1.62806	0.544413	0.527623	-0.630701
AT3G14120	-0.00148266	-0.268147	-0.636778	-1.78568	0.583771	-0.0515244	-0.933763
AT3G11570	2.19837	1.55899	1.11566	0.722856	0.428304	-0.654413	-0.407829
AT5G23770	0.195939	-0.146964	-0.189797	-0.589174	0.524342	0.138606	0.0821326
AT3G48810	-0.223733	-0.260432	-0.419608	-0.586812	0.0892276	-0.106647	-0.237151
AT3G61185	3.21997	-0.10757	0	0	-19.1524	-22.3724	-19.0448
AT1G62835	-1.00713	-0.450998	-0.831311	0.248836	-0.353597	-0.177779	0.346237
AT1G70560	-0.157822	-0.0831851	0.103213	-0.515798	-0.154246	0.106789	-0.586859
AT4G36060	1.33334	0.747227	1.93432	1.8839	-1.81654	-1.21556	-0.67987
AT4G21926	-0.201938	-0.0496977	-0.451606	-0.0621197	0.137695	-0.111973	0.125273
AT5G54850	-0.343041	-0.148293	0.106659	0.20517	-0.0471714	0.402528	0.306292
AT1G12775	-0.018893	-0.121562	-0.266091	-0.464339	0.019543	-0.227655	-0.323234
AT5G25090	0.59066	0.670269	1.64199	1.80605	-0.807129	0.244202	0.32865
AT1G25540	0.668824	-0.318994	-0.352852	-1.69393	0.675142	-0.346533	-0.699798
AT5G25830	-0.0456874	0.115004	-0.0808387	-0.00913967	0.251166	0.216015	0.127022
AT3G06830	0.264236	0.0181354	0.0471126	-0.294835	-0.0340475	-0.251171	-0.347017
AT3G51910	-0.859146	0.0338319	-0.83763	-0.0157392	0.355232	0.376748	0.305661
AT1G64760	0.434811	0.398391	0.192301	0.0555421	0.197244	-0.0452662	-0.145606
AT5G44040	-0.500446	-0.445012	-0.666537	-0.950032	0.704907	0.538817	0.199888
AT1G27460	-0.605256	-0.7559	-1.07359	-1.17334	0.350751	-0.117587	-0.0666842
AT1G11570	0.287327	-0.296351	0.92142	1.59149	-1.18886	-0.554766	0.698981
AT5G18930	-0.700777	-0.487115	-0.312166	-1.11485	0.0456789	0.43429	-0.582053
AT2G41960	0.558065	-0.471142	-0.669424	-2.37894	1.01778	-0.209712	-0.890022
AT1G69950	0.063619	-0.543324	-0.79085	-1.87888	0.720126	-0.134343	-0.615426
AT5G55470	-0.629135	-0.288613	-0.430101	-0.312708	-0.086574	0.11246	-0.110669
AT1G06590	0.153723	-0.14879	-0.322029	-0.715743	0.349908	-0.125844	-0.217045
AT5G37410	-0.0976826	-0.140623	-0.0843385	-0.488691	0.338434	0.351778	-0.00963391
AT1G06580	-0.11073	-0.172643	-0.10564	-0.0098849	0.178082	0.183171	0.34084
AT2G36355	0.347007	-0.351867	0.536532	0.425536	0.0602116	0.249736	0.837614
AT5G07620	-0.118262	0.509229	-0.0860061	-0.0313871	0.25751	0.289766	-0.283106
AT2G19250	0.373458	0.0600754	-0.137438	-0.36225	0.368862	-0.142033	-0.0534633
AT3G48390	0.151541	-0.245695	0.0810474	-0.76016	0.392082	0.321588	-0.122383
AT1G72200	-0.371295	-0.4785	-0.377275	-0.0702811	0.117445	0.111465	0.525664
AT3G59290	0.597649	-0.10446	-0.396207	-1.92832	0.768166	-0.225691	-1.0557
AT5G24920	0.0230151	0.65319	0.472509	0.746585	0.510707	0.960201	0.604102
AT4G17330	0.0859976	-0.631135	-0.64415	-1.9891	0.805451	0.0753033	-0.55251
AT5G45330	-0.351729	-0.794573	-0.728864	-1.02488	0.0883406	-0.288795	-0.141969
AT1G63860	1.01884	0.628449	0.367572	-0.19647	0.673518	0.0222527	-0.1514
AT2G34500	4.10305	2.5849	1.91692	1.22261	0.711858	-1.47427	-0.650433
AT5G61200	-0.481347	-0.540416	-0.315273	-0.294922	0.466187	0.632262	0.711681
AT1G70885	-0.198001	-0.158814	-0.509316	-0.168472	-0.18427	-0.495585	-0.193928
AT3G49690	2.64986	1.95178	2.59017	1.80226	-0.0594118	-0.119111	-0.208928
AT5G64640	-0.276383	-0.439521	-0.394416	-0.902433	-0.0793019	-0.197335	-0.542213
AT1G53680	-1.10548	-0.778725	-0.69762	0.282819	-0.22042	0.187444	0.841125
AT1G10160	-0.00754025	-0.154652	-0.0955027	-0.376731	-0.0312885	-0.119251	-0.253368
AT5G04890	0.110639	0.120326	0.206969	-0.0779812	0.156229	0.252559	-0.0420777
AT4G12010	1.08807	0.0590365	0.089259	-0.965836	0.677681	-0.321131	-0.347191
AT4G21903	1.38194	1.30431	1.97813	1.83363	-0.931065	-0.334884	-0.401744
AT2G36970	-1.19872	-0.34374	-1.39919	-0.459978	-0.122896	-0.323367	-0.239134
AT4G17240	-0.463883	-0.125894	-0.242895	-0.11461	-0.058807	0.162181	-0.0475235
AT4G22280	-0.580627	-0.310076	-0.0025963	0.671616	-0.485573	0.0924581	0.496119
AT1G76540	-0.129621	-0.36472	0.673956	-0.31814	-0.693934	0.109644	-0.647354
AT1G08300	0.407162	0.261716	-0.53093	-0.982328	0.586794	-0.351298	-0.657249
AT3G59690	0.333382	-0.502602	-0.322734	-1.51746	0.409315	-0.246802	-0.605543
AT1G61970	0.0542162	-0.344814	-0.550751	-0.586494	0.505291	-0.0996763	0.263611
AT4G13330	-0.0138005	0.0136447	-0.555065	0.0355223	0.485286	-0.055978	0.507164
AT1G60505	0.0383656	-0.355467	-0.582944	-1.14255	0.142191	-0.479119	-0.644896
AT4G39600	-0.209601	-0.218461	-0.411886	-0.635264	0.159243	-0.0430422	-0.25756
AT3G60310	0.043063	-0.515415	-0.660659	-1.0895	0.561177	-0.142545	-0.0129115
AT3G02500	-0.512191	-0.153985	-0.312048	0.758181	-0.328636	-0.128493	0.58353
AT2G07799	-0.043824	-0.149861	-0.0302947	0.74688	-2.23279	-2.21926	-1.33605
AT4G19865	-0.318125	-0.379482	-0.511213	-1.41082	0.419891	0.226802	-0.611447
AT3G53860	0.236691	-0.270248	-0.21895	-0.941919	0.370472	-0.0851699	-0.301199
AT1G10450	0.227019	-0.612172	-0.72837	-1.87992	0.901503	-0.0538857	-0.36625
AT1G74180	-0.0424988	-0.632063	-0.410979	-0.859341	0.33694	-0.0315396	0.109662
AT3G48410	-0.427223	-0.469729	-0.892498	-0.797957	-0.03628	-0.501555	-0.364508
AT5G24970	-0.0966784	-0.489849	-0.335593	-1.26885	0.182964	-0.0559505	-0.596039
AT1G73602	-0.960035	-0.469686	-1.15579	-1.58455	0.0174328	-0.178319	-1.09743
AT1G75190	-0.300685	0.0982413	-0.104414	0.546422	0.548785	0.745056	0.996966
AT2G13130	0.051295	-0.0927029	-0.158687	-0.272746	0.402179	0.192197	0.222136
AT1G16710	0.356088	-0.39772	-0.386571	-1.83314	0.770766	0.0281073	-0.664655
AT3G57350	-0.348188	-0.767218	-0.939218	-1.50429	0.340417	-0.250614	-0.396657
AT1G79950	0.484155	-0.40178	-0.490774	-1.56215	0.751045	-0.223884	-0.409325
AT2G35110	0.428372	-0.425595	-0.402607	-2.06613	0.82136	-0.00961864	-0.819176
AT5G62520	3.04145	1.88106	3.37485	2.65151	-0.766559	-0.433157	0.00389284
AT5G51670	-0.800344	0.449763	-0.511197	0.278122	-0.0749939	0.214153	-0.246635
AT1G79150	0.389124	-0.364826	-0.73187	-1.56911	0.751211	-0.369782	-0.453078
AT4G03811	-0.574787	-0.349562	-0.840586	0.623501	-0.178858	-0.444657	0.794205
AT1G20930	0.184067	0.135117	0.518959	0.447176	-0.366569	-0.0316777	-0.0545104
AT1G33800	0.425094	0.0880259	0.499104	0.283546	-0.191058	-0.117047	0.00446252
AT4G01740	0.981217	0.629762	0.478214	0.367912	0.64015	0.137147	0.3783
AT4G13660	3.90384	2.33296	4.94197	3.82863	-2.19259	-1.15445	-0.696919
AT3G25980	0.0755761	0.552431	0.904645	1.15149	-0.245613	0.583455	0.35345
AT1G23230	0.390511	-0.310612	-0.479542	-2.24945	0.766618	-0.103436	-1.17222
AT1G06150	9.55296e-05	-0.112877	-0.100451	-0.386715	-0.0178656	-0.118413	-0.291703
AT4G28700	-0.677511	-0.3765	-0.735794	-0.287761	-0.00598523	-0.0642682	0.0827539
AT2G44580	-0.256318	0.360377	0.450349	0.759581	-0.185555	0.521113	0.213649
AT1G43886	0.145264	0.146616	-0.119969	0.211448	0.130629	-0.134604	0.195461
AT5G64980	-0.47262	-0.118411	-0.460028	-0.175571	0.0548066	0.0673987	-0.00235278
AT5G12100	0.0112604	-0.488674	-0.606659	-1.58592	0.498505	-0.119415	-0.598745
AT2G37100	-1.44645	-0.480679	-0.781829	-0.404073	-0.0193884	0.645228	0.0572183
AT1G06265	0.747225	0.410048	-0.604431	-0.308622	0.922178	-0.429478	0.203508
AT1G37150	0.906569	0.388564	0.477133	1.18065	-0.298709	-0.728145	0.493376
AT4G20000	3.1969	2.22253	2.85327	2.84414	0.190322	-0.153305	0.811935
AT2G05914	-0.418464	1.70961	-0.498639	0.474679	-0.469422	-0.549597	-1.70435
AT1G68850	3.55033	1.78648	4.63349	2.87505	-2.07048	-0.98732	-0.981903
AT5G50315	0.271934	0.271953	0.679391	0.790928	0.165993	0.57345	0.684968
AT1G53887	-0.118097	0.447655	0.19907	1.12403	-0.608433	-0.291266	0.0679464
AT1G68350	1.49106	0.994321	1.66074	1.86485	-0.55426	-0.38458	0.316273
AT3G42725	1.29404	1.19483	1.80075	1.30706	-0.386637	0.120075	-0.274413
AT2G34340	0.535942	0.914772	-0.0422408	0.498362	0.92726	0.349077	0.51085
AT5G58520	-0.450404	-0.719791	-1.03768	-1.83377	0.656369	0.0690893	-0.457613
AT2G19950	0.855435	-0.346608	-0.611032	-1.70227	0.931143	-0.535324	-0.424522
AT1G72140	2.93432	2.29789	17.3555	14.3996	-19.678	-4.25086	-6.57028
AT2G16870	1.15305	0.553288	0.790556	-0.194946	0.548362	0.185866	-0.199872
AT2G05910	0.948956	0.623135	-0.448464	0.106692	0.687161	-0.710259	0.170718
AT3G12915	0.363673	-0.245815	-0.463278	-1.41756	0.423242	-0.403709	-0.748508
AT1G68470	0.85481	-0.0397157	0.385666	-0.858246	-0.23361	-0.702755	-1.05214
ATCG00340	-0.721757	-0.963354	-1.08482	-1.57839	0.384438	0.0213701	-0.230595
AT1G24265	-0.157848	0.0146142	-0.205437	0.0823645	-0.178613	-0.226202	-0.110863
AT1G23465	0.354015	-0.122646	0.42903	0.216241	0.121761	0.196775	0.460648
AT1G18620	-0.366574	-0.74776	-0.560151	-1.94795	0.656131	0.462555	-0.54406
AT1G11572	2.9178	2.24385	3.5897	3.21549	-0.549979	0.121922	0.421658
AT1G53520	-2.14633	-0.768973	-1.57099	0.706022	-0.360035	0.215304	1.11496
AT1G64600	-0.309985	-0.407898	-0.665894	-1.08253	0.413349	0.0574398	-0.261282
AT2G46180	0.8058	-0.268774	-0.48844	-1.79409	0.882268	-0.411972	-0.643047
AT2G17780	-0.368718	-0.27643	-0.110742	0.00436847	0.221857	0.479832	0.502655
AT4G14590	-0.177057	-0.409019	-0.0203854	-0.21103	0.326001	0.482672	0.52399
AT1G64270	0.0881032	-0.144272	-0.360722	-1.22771	0.457822	0.00899691	-0.625614
AT4G20350	-0.85582	-0.553558	-0.73343	0.185681	-0.185521	-0.0631315	0.553717
AT1G14850	-0.113308	-0.385007	-0.589053	-2.1463	0.607348	0.131603	-1.15395
AT5G42350	-0.096167	-0.0776663	-0.238482	-0.628305	0.242462	0.100147	-0.308176
AT5G05965	1.59839	1.52387	1.17141	0.61861	-0.0532879	-0.480265	-0.958544
AT1G45120	-0.142261	-0.514418	-0.0400651	-0.101899	0.404882	0.507078	0.817401
AT2G35630	0.168998	-0.460213	-0.687926	-2.32266	0.985661	0.128737	-0.87679
AT4G02100	-0.444332	0.00888595	-0.113746	0.101706	-0.101028	0.229558	-0.00820853
AT1G65900	-0.517998	-0.212431	-0.0250062	0.564838	-0.328654	0.164338	0.448615
AT4G20325	-0.528851	0.0553516	-0.0254578	0.685541	-0.10862	0.394773	0.52157
AT1G64960	-0.32487	-0.500803	-0.411575	-1.55217	0.444227	0.357522	-0.60714
AT4G02320	5.08968	3.59691	4.10895	2.26791	-0.0987318	-1.07946	-1.42773
AT2G30500	-0.229327	-0.60315	-0.504661	-1.90072	0.391674	0.116339	-0.905893
AT5G18525	0.676439	-0.0550682	-0.421068	-1.28166	0.656553	-0.440954	-0.570037
AT3G48430	0.188974	-0.616425	-0.468447	-1.97723	0.726238	0.0688166	-0.634564
AT5G52220	-0.522328	0.525293	0.391325	1.56639	-0.623481	0.290172	0.417615
AT5G16780	0.185093	-0.663356	-0.642023	-2.39427	0.977937	0.150821	-0.752976
AT5G43570	2.72688	-0.797685	21.3487	19.4897	-20.1331	-0.505189	1.16034
AT1G24577	-0.501948	-0.0442638	-0.0659961	1.07516	-0.285497	0.150455	0.83393
AT1G26380	3.4429	2.46176	3.69154	2.40716	-0.467602	-0.218962	-0.522207
AT3G53403	0.504336	-0.239294	0.485203	0.58178	0.34333	0.324197	1.1644
AT2G26220	-0.337896	0.14099	-0.648155	-0.244847	0.191461	-0.118797	-0.194375
AT5G51680	0.0560749	-0.40192	-0.441807	0.108027	-0.140374	-0.638256	0.369573
AT1G52270	-1.05107	0.170751	0.303979	0.925322	-0.261492	1.09356	0.49308
AT1G11190	0.0321422	-0.1279	-0.258783	-0.108298	0.083621	-0.207304	0.103222
AT3G24929	-0.287867	-0.0359843	-0.288496	-0.277409	0.688536	0.687907	0.447111
AT3G52310	0.527357	0.0456179	-0.0423567	-0.431329	0.250275	-0.319439	-0.226673
AT5G61140	0.510677	-0.385156	-0.4504	-1.45197	0.815378	-0.145699	-0.251436
AT4G32620	0.521357	-0.525853	-0.577632	-2.01827	0.937486	-0.161503	-0.554929
AT1G09800	-0.207591	-0.544788	-0.514594	-0.951139	-0.0696825	-0.376685	-0.476033
AT3G52605	-0.481823	0.116259	-0.534464	-0.268605	-0.289767	-0.342409	-0.674631
AT5G41080	2.78439	2.52602	1.78072	0.871446	1.30871	0.305044	-0.345865
AT5G51580	0.371934	0.852619	-0.0229293	0.663292	0.0745122	-0.320351	-0.114815
AT5G44910	0.118415	-0.215903	-0.295001	-0.840296	0.64362	0.230204	0.0192273
AT1G74750	0.52335	-0.0874412	-0.140628	-1.29503	0.283163	-0.380815	-0.924428
AT1G62860	-0.136121	-0.312105	-0.356976	-0.67914	0.503677	0.282822	0.136641
AT3G06433	-0.271432	0.267678	0.254819	0.848038	-0.28327	0.242981	0.297091
AT4G21880	-0.555675	-0.835654	-0.578651	-1.23852	0.640859	0.617883	0.237996
AT5G04240	0.31135	-0.457949	-0.513458	-1.86212	0.886716	0.0619071	-0.51746
AT3G01320	0.634317	-0.289941	-0.560472	-1.81242	1.06518	-0.129608	-0.457301
AT5G66350	0.414729	0.546334	0.279439	0.0342769	0.0637408	-0.0715498	-0.448316
AT2G29125	-1.22921	-0.435112	-0.399148	0.255451	-0.331003	0.499056	0.35956
AT1G09575	-0.410005	0.451064	-0.433824	0.408546	0.61783	0.594012	0.575313
AT3G60860	0.488865	-0.173413	-0.149976	-1.51117	0.708981	0.0701403	-0.628774
AT1G14460	0.0681748	-0.493783	-0.710632	-1.94012	0.729983	-0.0488239	-0.716357
AT4G36150	1.31113	0.734631	0.855396	-0.397148	0.79031	0.334573	-0.341469
AT3G23260	0.203401	0.263338	-0.0401022	0.44491	0.00551054	-0.237993	0.187082
AT4G28070	-0.12333	-0.0975748	-0.277356	-0.485452	-0.225611	-0.379637	-0.613489
AT2G03850	5.17727	-15.6342	3.35747	-0.331675	0.244586	-1.57521	16.5531
AT1G25530	-0.307756	-0.722657	0.210541	0.0223854	-0.300216	0.21808	0.444826
AT5G56540	0.0918124	-0.122839	0.186178	0.772485	-0.419592	-0.325226	0.475732
AT1G22330	-0.941739	0.0131059	-0.732742	-0.0936389	0.518575	0.727572	0.411831
AT3G14700	0.46807	0.294308	0.722276	1.12363	-0.0592482	0.194958	0.77007
AT2G34440	0.0877267	-0.318043	-0.0279864	0.00729753	0.0468054	-0.0689078	0.372145
AT3G25905	-0.666609	0.188153	-0.318546	0.33227	-0.13842	0.209643	0.00569732
AT5G58300	-0.24684	-0.41098	-0.37973	-1.1771	0.116629	-0.0162616	-0.64949
AT2G21540	-0.744667	-0.685359	-1.19077	-1.17948	0.34515	-0.100955	-0.148966
AT1G07290	0.247551	-0.283345	-0.599854	-0.803522	-0.0261427	-0.873548	-0.54632
AT1G76170	-0.214957	-0.120865	-0.280842	-0.21251	0.326083	0.260197	0.234438
AT5G03377	0.331676	0.114887	-0.135101	-0.162575	0.225684	-0.241094	-0.0517783
AT1G24460	0.778844	-0.259607	-0.373076	-2.23397	1.07191	-0.0800142	-0.902456
AT5G20540	-0.205639	-0.149756	-0.384505	-0.779022	0.114262	-0.0646042	-0.515004
AT5G25010	0.275353	0.380768	0.779803	1.06755	-0.345606	0.158843	0.341177
AT4G25692	0.303398	0.61912	0.712162	0.9085	-0.144899	0.263865	0.144482
AT3G48630	1.83428	1.62711	2.19574	2.70041	-0.450442	-0.0889883	0.622854
AT3G59710	-0.542003	0.242584	0.241676	0.567525	-0.693866	0.0898128	-0.368925
AT4G37110	-0.753184	-0.755915	-0.851382	-0.814849	0.140382	0.0421833	0.0814483
AT1G67980	4.7905	3.48955	5.95931	5.04474	-1.60165	-0.432837	-0.0464551
AT5G58600	0.450183	0.633911	0.102388	0.278859	-0.0702077	-0.418002	-0.42526
AT3G04060	1.66564	1.14083	1.52703	1.03592	0.193948	0.0553396	0.0890384
AT1G01040	0.36955	-0.255443	-0.563307	-1.69146	0.840834	-0.0920223	-0.595182
AT3G46690	4.07082	2.74949	5.68937	4.78543	-2.75615	-1.1376	-0.720213
AT5G15680	0.402764	-0.323891	-0.463274	-1.94308	0.775257	-0.0907809	-0.843932
AT4G02900	-0.0571305	-0.586238	-0.612177	-1.05963	0.410995	-0.144051	-0.0623965
AT2G25480	-0.498669	-1.00305	-1.23896	-1.83477	0.653829	-0.0864629	-0.177898
AT1G63250	0.312937	-0.41423	-0.614605	-1.399	0.518666	-0.408876	-0.466101
AT5G06620	-0.470079	-0.105187	0.0148499	0.584914	-0.333129	0.1518	0.356973
AT5G65170	0.757592	0.507358	-0.0180642	-0.490387	0.169548	-0.606108	-0.828196
AT3G17740	0.467128	-0.142885	-0.378447	-1.23618	0.488294	-0.357281	-0.605004
AT5G39330	-0.00417109	0.161032	-0.0817521	0.458643	0.0372218	-0.0403593	0.334833
AT1G68890	-0.493181	-0.975034	-0.903197	-1.90536	0.608667	0.198651	-0.321658
AT2G35290	1.52449	1.44901	1.63492	1.56773	-0.127054	-0.0166184	-0.00832646
AT4G13320	0.126221	0.563739	0.0683561	0.570176	-0.0623912	-0.120256	-0.0559544
AT4G23150	2.85183	2.08619	2.54272	1.64416	0.213565	-0.0955452	-0.228463
AT5G18820	-0.12801	-0.639047	-0.674896	-1.5582	0.485952	-0.0609341	-0.433202
AT3G42806	-0.123937	0.264273	-0.0978708	0.362369	0.0560333	0.0820994	0.154129
AT1G74030	0.293086	-0.608236	-0.423296	-1.68378	0.233267	-0.483115	-0.842279
AT5G10970	-0.831134	-0.374504	-0.433123	-0.00611867	-0.0647927	0.333219	0.303593
AT1G12700	-0.570362	-0.492868	-0.486791	-0.435178	0.170534	0.254104	0.228225
AT5G51795	-0.142586	0.111297	-0.650177	0.0590773	0.286216	-0.221375	0.233996
AT3G09190	-1.04162	-0.659901	-0.883881	-0.0660177	-0.0715332	0.0862047	0.52235
AT3G25620	-0.214626	-0.184479	-0.299879	-0.476507	0.124885	0.0396314	-0.167144
AT2G39850	-0.115729	-0.866918	-1.24429	-2.87639	0.832829	-0.295733	-1.17664
AT2G45870	0.361955	0.161983	0.165813	-0.183363	-0.290631	-0.486773	-0.635977
AT5G46130	-0.155231	0.148498	0.435683	0.963842	-0.3581	0.232814	0.457243
AT4G16310	0.305054	-0.504888	-0.572405	-2.28029	0.95619	0.07873	-0.819215
AT3G12110	-0.590502	-0.389128	-1.09901	-1.04651	0.635395	0.126883	-0.0219867
AT3G19080	-0.153968	-0.457854	-0.837163	-1.54008	0.277805	-0.40539	-0.804422
AT3G26134	0.461206	0.25662	0.419361	0.915488	-0.164752	-0.206598	0.494116
AT5G57567	0.423484	-0.0155503	-0.366402	0.789824	0.25728	-0.532605	1.06265
AT1G32960	6.01146	3.72298	3.97508	1.4023	0.872787	-1.1636	-1.4479
AT2G47410	0.377227	-0.511539	-0.531676	-1.98437	0.814265	-0.0946383	-0.658564
AT1G74390	0.004016	-0.431184	-0.525995	-1.12767	0.279523	-0.250488	-0.416958
AT1G72970	-1.60598	-0.704181	-1.43314	-0.776929	-0.101328	0.0715142	-0.174076
AT3G60200	0.0690545	0.612324	-0.103142	0.492389	0.519757	0.34756	0.399822
AT1G10460	-1.11832	-0.156548	-0.498613	0.680778	-0.0809694	0.538734	0.756357
AT1G58230	0.495785	-0.441119	-0.463418	-1.57411	0.903933	-0.0552713	-0.229061
AT3G11340	5.51465	5.90142	4.66269	5.27178	0.594565	-0.257398	-0.0350725
AT3G26816	-1.31441	0.409224	-2.11633	-0.441754	0.925335	0.123413	0.0743565
AT2G47200	2.31402	1.44749	2.91885	3.17853	-0.975497	-0.37067	0.75554
AT4G33610	3.77041	1.63881	6.18667	3.1328	-3.2118	-0.795535	-1.71782
AT5G59580	6.31522	5.10418	6.83665	6.02195	-0.107358	0.414079	0.810414
AT3G25440	-0.359084	-0.363172	-0.852254	-1.18162	0.465934	-0.0272365	-0.352517
AT1G77640	2.15388	3.99112	2.80138	2.0877	0.516593	1.1641	-1.38682
AT4G33130	1.11376	0.911789	0.475894	1.14038	-0.47247	-1.11033	-0.243876
AT1G77960	-0.462449	-0.423399	-0.437375	-0.71359	-0.846897	-0.821823	-1.13709
AT3G11440	0.344527	0.0960017	-0.148856	-0.477573	0.348407	-0.144976	-0.225167
AT5G37260	-0.254735	0.0324014	0.25842	0.162738	0.359686	0.872841	0.490023
AT5G59845	0.46872	0.317099	-0.400902	0.636062	-0.147459	-1.01708	0.171505
AT1G49490	-0.708181	-0.0709386	-0.435804	-0.0623831	-0.085852	0.186525	-0.0772965
AT5G16230	-0.0478256	0.0989373	-0.239554	-0.406096	0.172876	-0.0188526	-0.332158
AT3G62780	1.7752	2.00453	1.67201	1.83187	0.528938	0.42574	0.356276
AT1G21580	0.280434	-0.561056	-0.716053	-1.99702	0.971283	-0.0252036	-0.464684
AT1G08270	0.472622	0.245434	-0.116931	-0.0824159	0.42187	-0.167683	0.0940206
AT4G38480	0.10229	0.126068	-0.140612	0.293363	-0.146767	-0.389669	0.0205273
AT3G47580	-0.439203	-0.338221	-0.192958	-0.512998	0.0298871	0.276132	-0.14489
AT3G59890	-0.766066	-0.458992	-0.558421	0.490648	-0.263247	-0.0556017	0.686393
AT2G26710	-0.982466	-1.04354	0.0795863	-1.03204	0.0944703	1.15652	0.10597
AT5G56300	2.27932	1.67894	2.1577	2.69643	-0.232584	-0.354209	0.78491
AT4G35070	0.279247	0.3496	0.563689	0.504584	-0.125688	0.158754	0.0292954
AT1G73450	0.120805	-0.549462	-0.615982	-1.54708	0.621502	-0.115285	-0.376113
AT4G25610	0.49798	-0.27731	-0.111384	-1.32743	0.453852	-0.155512	-0.596265
AT1G10040	1.72103	1.08781	0.685108	0.56977	0.25154	-0.784379	-0.2665
AT4G21530	-0.417281	-0.528162	-0.760299	-1.34318	0.289806	-0.0532122	-0.525214
AT1G30610	0.137879	-0.750039	-0.72555	-1.85494	0.775669	-0.0877597	-0.329237
AT2G20835	-1.36298	0.0820933	-0.637816	-0.300092	0.743117	1.46828	0.360931
AT1G52910	1.68002	1.75876	2.08451	2.23919	-0.292222	0.112274	0.188211
AT1G15580	-0.831596	-0.700741	0.91537	0.704328	-0.946823	0.800142	0.458245
AT4G28230	-0.0943998	-0.150275	-0.482443	-1.3632	0.257219	-0.130823	-0.95571
AT4G32730	0.0757575	-0.42021	-0.25375	-0.897641	0.202567	-0.126941	-0.274864
AT5G16420	0.49613	0.123086	0.105577	-0.256113	0.201164	-0.189389	-0.178034
AT1G32760	-0.692137	0.0155105	-0.387194	0.169986	-0.0411837	0.26376	0.113292
AT5G20610	0.586445	-0.381837	-0.596333	-2.03228	0.801999	-0.380778	-0.848443
AT4G27852	2.55842	1.01505	1.72571	0.809666	0.106339	-0.726372	-0.0990495
AT3G49210	1.31102	0.338622	0.493766	-0.332514	0.427405	-0.389848	-0.243731
AT1G65440	0.391265	-0.473737	-0.815673	-2.01373	1.1389	-0.0680425	-0.401101
AT2G40820	0.0515001	-0.811769	-0.943546	-1.86551	0.60414	-0.390906	-0.449603
AT2G36540	0.0776612	0.598138	0.579313	0.975233	-0.0159593	0.485693	0.361136
AT1G62130	0.183463	-0.194002	-0.675363	-1.15268	0.59188	-0.266946	-0.366802
AT5G51350	0.577287	0.213458	0.589226	-0.228206	-0.205035	-0.193096	-0.646699
AT2G04515	2.29787	2.30784	2.76882	3.11259	0.00974153	0.480688	0.814493
AT5G23950	1.37562	0.259254	0.54808	0.711023	0.115901	-0.711641	0.56767
AT4G21220	-0.0834381	0.311663	-0.036617	0.875121	-0.173821	-0.127	0.389637
AT2G40160	0.197095	0.229603	-0.202165	0.257423	0.156455	-0.242805	0.184275
AT3G25430	-0.0385555	-0.236238	-0.67265	-0.742053	0.256743	-0.377351	-0.249071
AT5G50760	1.49057	1.36381	1.09475	1.28991	0.485482	0.089669	0.411591
AT3G04740	0.206555	-0.385102	-0.548129	-2.46036	0.713675	-0.0410083	-1.36158
AT5G01110	-0.167855	-0.24294	-0.388743	-0.27291	0.220111	-0.000776933	0.190141
AT5G44380	4.9722	2.77235	5.92362	3.7547	-1.28929	-0.337872	-0.30694
AT5G43730	0.234137	-0.280462	-0.220876	-0.677991	0.412238	-0.0427753	0.0147088
AT5G51540	-0.128222	-0.50724	-0.826115	-1.77097	0.463879	-0.234014	-0.799847
AT1G49530	1.73337	0.970878	1.15971	-0.0717954	0.483879	-0.0897817	-0.558795
AT4G03190	-0.813222	-0.582478	-1.02595	-1.18739	0.30012	0.0873923	-0.304788
AT3G48120	-0.0142431	-0.512506	-0.8558	-1.33142	0.270937	-0.57062	-0.547982
AT1G35220	0.850087	0.095085	0.188694	-0.851743	0.384555	-0.276838	-0.562273
AT1G79560	-0.0853918	-0.792265	-1.04895	-2.13134	0.747261	-0.216301	-0.591818
AT3G54280	-0.168254	-0.725125	-0.760737	-2.09677	0.737246	0.144763	-0.634401
AT4G24270	0.0343021	-0.416641	-0.766748	-1.91357	0.770294	-0.0307558	-0.726635
AT2G46630	-0.23182	-0.499902	-0.809041	-0.952945	0.00916774	-0.568053	-0.443876
AT3G20090	-0.450071	-0.140705	-0.32431	0.169587	-0.154289	-0.0285283	0.156003
AT1G32930	0.234569	-0.054785	-0.261237	-0.00296207	0.164659	-0.331147	0.216482
AT5G44540	0.0125617	0.298409	0.0649991	0.779156	-0.177386	-0.124948	0.303361
AT3G15140	-0.25543	-0.259758	-0.187342	0.147773	-0.249225	-0.181137	0.158307
AT3G63300	0.206973	-0.0574349	0.311484	0.0146044	-0.180423	-0.0759123	-0.108384
AT3G48870	-0.0491839	-0.726238	-1.01322	-2.13246	0.943063	-0.0209735	-0.463159
AT5G47940	0.490865	-0.404285	-0.416006	-1.41408	0.596033	-0.310838	-0.413762
AT5G17910	0.640399	-0.447835	-0.452472	-1.83824	1.00843	-0.0844434	-0.381981
AT2G18370	4.33546	2.92926	17.5748	18.8634	-17.3313	-3.08593	-0.391215
AT2G23590	-0.983178	-0.448794	-0.838372	-0.238293	-0.0594365	0.0853688	0.151064
AT4G10600	-0.431885	0.0474995	-0.371616	0.0965477	0.408078	0.468347	0.457126
AT2G30933	-0.00607469	-0.109855	0.0158059	0.22935	-0.0848735	-0.0629929	0.254331
AT4G33905	0.871187	0.407867	1.81807	0.86816	-0.683488	0.263394	-0.223195
AT4G29790	0.51782	-0.284028	-0.407072	-1.73435	0.857589	-0.0673024	-0.592728
AT1G21150	-0.330973	-0.156732	-0.605269	-0.00869896	-0.0395876	-0.313884	0.108445
AT5G03800	-0.377479	-0.74562	-0.951787	-1.20227	0.0849254	-0.489383	-0.371725
AT1G54000	6.24602	5.33108	21.6725	20.8782	-16.8015	-0.369083	-0.248465
AT2G26692	0.132405	0.0575124	-0.0393965	0.180128	0.197685	0.0258843	0.320301
AT1G69020	0.388743	0.249356	-0.384342	-0.302752	0.443981	-0.329105	-0.108126
AT4G17970	0.251902	-0.0891741	0.270581	-0.947071	0.289909	0.308588	-0.567988
AT5G55950	-1.34364	-0.455222	-0.400142	0.299539	-0.377687	0.565808	0.377073
AT2G41220	0.206095	-0.558497	-0.618043	-2.00619	0.780248	-0.0438898	-0.66745
AT1G73830	-1.386	-0.556041	-0.631832	-0.0515365	0.563948	1.31811	1.06845
AT5G19221	-0.522842	-0.390804	-0.798944	-0.88787	0.524412	0.248309	0.0273454
AT2G29760	0.0754073	-0.524148	-0.43717	-0.639839	0.212522	-0.300055	0.0968321
AT3G04010	1.50034	0.652808	1.18263	0.687291	-0.0210263	-0.338735	0.013457
AT5G45780	0.232735	-0.0578691	-0.025179	-0.213988	0.18355	-0.0743642	0.027431
AT5G35120	-0.416024	-0.188177	-0.902578	-0.683605	-0.47531	-0.961863	-0.970738
AT4G01130	0.198084	0.230844	-0.0146066	0.359209	-0.00834572	-0.221036	0.120019
AT5G28490	-0.119705	-0.0708693	-0.833553	-0.749763	0.487072	-0.226776	-0.191821
AT3G60490	1.46585	1.21159	1.00935	1.17907	0.191102	-0.265399	0.158577
AT5G40740	0.0202023	-0.329872	-0.532355	-1.32622	0.574091	0.0215343	-0.422254
AT5G06730	4.40562	3.42906	3.80792	2.73483	-0.0251029	-0.622802	-0.719342
AT1G74250	0.309093	-0.431825	-0.729329	-2.89622	1.07095	0.0325321	-1.39344
AT5G38310	2.88757	2.74026	3.04666	2.82611	0.357666	0.516749	0.443514
AT4G10695	0.201553	-0.665375	-0.659254	-0.510541	0.34219	-0.518617	0.497023
AT1G68872	0.0927483	0.150786	-0.114989	0.371894	-0.0309487	-0.238686	0.190159
AT5G54569	-0.0360151	-0.0774184	-0.672933	-0.784029	0.487037	-0.14988	-0.219573
AT3G06520	-0.272561	0.0206801	-0.268296	0.328072	0.187844	0.192109	0.495237
AT5G55840	-0.00511344	-0.324955	-0.312104	-0.766032	0.383278	0.0762876	-0.0577995
AT3G51300	-0.406969	-0.154275	-0.505662	0.416301	-0.222168	-0.320862	0.348408
AT1G66600	4.87092	5.303	5.04876	5.74554	-0.374885	-0.197046	0.067655
AT1G08050	2.07093	1.54392	1.69986	0.678599	0.179264	-0.191802	-0.686052
AT1G10270	0.226223	-0.17074	-0.376964	-1.55464	0.471252	-0.131935	-0.912644
AT3G04380	-0.0344858	-0.347162	-0.363176	-0.0217922	0.123441	-0.205249	0.44881
AT2G40550	-0.00193119	-0.0295047	0.0449492	-0.51869	0.0670567	0.113937	-0.422129
AT3G47530	0.20698	0.0267882	0.21981	-0.12942	-0.317335	-0.304505	-0.473543
AT1G12290	0.765851	0.326604	0.290843	-0.194816	0.567468	0.0924608	0.0460477
AT3G47780	1.34123	0.0466411	0.791936	-0.883879	0.191671	-0.357626	-0.738849
AT2G21710	-0.202634	-0.419935	-0.358786	-0.620496	0.181291	0.0251385	-0.01927
AT1G53345	-0.519234	-0.00130814	-0.317728	-0.0320779	0.335273	0.536779	0.304503
AT1G74600	0.653541	0.441155	0.730609	0.0304766	0.205343	0.282411	-0.205336
AT2G26360	-0.12102	0.332807	-0.177786	0.674903	-0.239525	-0.296291	0.102571
AT3G13225	0.421587	-0.323543	-0.308547	-1.82198	0.620308	-0.109825	-0.878124
AT5G56840	-0.524303	0.966219	-0.38491	0.20255	0.534648	0.67404	-0.229021
AT1G69430	-0.302987	-0.106856	0.32321	0.672171	-0.225188	0.401009	0.553839
AT4G07400	-0.765658	-0.187258	-0.762031	-0.346478	0.337622	0.341249	0.178403
AT1G50270	-0.17134	-0.172221	-0.275572	-0.500532	0.305548	0.201317	-0.0227622
AT1G68700	0.746909	-0.20325	0.626896	-0.0218016	-0.150829	-0.270841	0.03062
AT1G02660	0.871968	-0.140671	0.539497	-0.732984	0.734785	0.402315	0.142472
AT2G19260	0.572694	-0.467255	-0.278033	-1.32353	0.716308	-0.134419	-0.139967
AT5G56050	1.31915	0.488619	1.33187	0.231454	-0.58291	-0.570197	-0.840074
AT5G45340	-0.018723	0.285083	-0.124038	-0.372032	0.440494	0.335179	-0.216621
AT3G23730	-0.384096	1.34366	-0.586057	0.70925	0.438268	0.236307	-0.196141
AT4G39050	-0.134922	-0.651617	-0.764414	-2.48038	0.811174	0.181682	-1.01758
AT3G21710	1.62208	0.707741	1.20028	1.65761	-0.54417	-0.965971	0.405701
AT4G24275	2.13868	1.87387	-0.569421	0.970581	0.721231	-1.98687	-0.182059
AT3G22180	0.633758	-0.0683225	0.178526	-0.828582	0.316189	-0.139044	-0.44407
AT2G39560	-1.69109	-0.483245	-1.03776	0.483219	-0.249691	0.403642	0.716773
AT2G15480	0.364781	0.348625	0.0387235	-0.142838	-0.0358406	-0.361898	-0.527304
AT1G02380	-0.742152	-0.198181	-0.864732	-0.298701	0.334334	0.211755	0.233815
AT4G33200	0.268991	-0.464645	-0.656522	-1.80824	0.837965	-0.0875483	-0.505633
AT1G64180	0.600468	-0.565505	-0.745324	-2.15107	0.714865	-0.630927	-0.870699
AT4G09432	0.267484	-0.0611011	0.00881249	-0.235993	-0.0265087	-0.28518	-0.2014
AT2G05120	-0.0375598	-0.462822	-0.636086	-1.6246	0.547536	-0.0509907	-0.614239
AT2G41370	-0.991514	-0.604827	-0.986641	-0.49514	0.31806	0.322933	0.427747
AT1G18940	-0.126794	0.174197	0.226714	0.482822	-0.0965903	0.256918	0.212035
AT3G03370	0.0510257	-0.118814	0.200221	0.366424	-0.374907	-0.225712	0.110331
AT5G56530	-0.922962	-0.664229	-1.24889	-0.757156	0.218178	-0.107747	0.125251
AT2G18000	1.0386	1.0887	1.46793	1.85927	-0.324027	0.105309	0.446548
AT2G26650	0.931029	0.490707	-0.10761	-1.15468	0.725239	-0.3134	-0.920143
AT5G02670	0.240373	-0.425089	-0.483459	-0.741273	0.547355	-0.176477	0.231172
AT3G02140	0.713287	0.558256	0.114039	-0.377284	0.831751	0.232503	-0.10379
AT3G09960	6.49705	4.55849	21.7145	20.3791	-16.0904	0.133022	0.736222
AT2G27170	0.435968	-0.611644	-0.568229	-1.64928	0.954576	-0.0496212	-0.0830557
AT5G46910	0.266006	-0.401061	-0.0811371	-1.38638	0.386433	0.0392895	-0.598884
AT4G03090	0.0213322	-0.484739	-0.4693	-1.36236	0.376727	-0.113905	-0.500896
AT4G16680	1.0327	0.0525811	-0.195269	-1.26391	0.815689	-0.412279	-0.500799
AT5G24352	0.452081	0.118858	-0.453627	-1.06891	0.698508	-0.2072	-0.489262
AT1G05550	0.466803	0.662729	0.132344	0.637219	0.164854	-0.169605	0.139343
AT1G61420	2.27156	1.00425	1.75319	0.679328	0.346095	-0.172282	0.0211732
AT1G70320	0.436067	-0.474385	-0.677162	-2.27014	1.13619	0.02296	-0.659564
AT3G21540	0.37638	-0.377786	-0.621861	-1.94308	0.756208	-0.242033	-0.809086
AT4G21230	2.00554	1.05762	1.55174	0.988478	0.206772	-0.247026	0.137633
AT3G48830	0.00514381	-0.200371	-0.272442	-0.310851	0.0521298	-0.225456	-0.0583501
AT3G50110	0.00851362	-0.445138	-0.406365	-1.25691	0.224708	-0.190171	-0.587067
AT5G52250	-0.139548	0.216709	-0.272208	-0.61477	0.788173	0.655513	-0.043306
AT4G31360	-0.289656	-0.00666285	-0.720879	-1.09181	0.540617	0.109394	-0.544531
AT5G08480	-0.602512	-0.157417	-0.566526	0.222913	0.0422603	0.0782459	0.42259
AT4G39420	0.608709	-0.299929	-0.395002	-1.41255	0.779299	-0.224412	-0.333322
AT1G61215	-0.300652	-0.222856	-0.234764	-0.369096	-0.1288	-0.0629111	-0.27504
AT3G06480	0.242827	-0.225046	-0.72771	-1.55049	0.697221	-0.273315	-0.628224
AT5G09480	3.08739	1.94259	3.63175	2.08329	-1.59733	-1.05297	-1.45663
AT5G46640	-0.610904	-0.110137	-0.491804	0.0331791	-0.225689	-0.106589	-0.0823726
AT1G31360	0.0985281	-0.398325	-0.581112	-1.36948	0.653916	-0.0257241	-0.317239
AT5G20730	0.575427	-0.301407	-0.217879	-2.19745	0.622591	-0.170716	-1.27345
AT2G17150	0.458798	-0.455093	-0.431901	-1.28567	0.518715	-0.371984	-0.311866
AT5G26790	-0.984294	-0.165753	-0.622142	0.927757	-0.968883	-0.606731	0.124626
AT3G59420	-0.121175	-0.390714	-0.547703	-1.39819	0.456898	0.0303703	-0.550582
AT3G43960	-0.794557	-0.456654	-1.32917	-1.24927	0.568253	0.0336448	-0.224366
AT3G22900	-0.600494	0.0451967	-0.131165	0.649869	0.123682	0.593012	0.728355
AT4G32710	-0.116002	-0.246077	-0.306652	-0.621067	0.199901	0.00925084	-0.175089
AT5G20790	-1.332	-1.06853	-1.6943	-1.02852	-0.095421	-0.457722	-0.0554042
AT5G43310	0.428929	-0.567996	-0.416538	-2.53018	0.937777	0.09231	-1.02441
AT3G45850	-0.0549498	-0.907806	-1.22322	-2.62118	0.925757	-0.242515	-0.787617
AT2G37362	-0.0394836	-0.369116	-0.280737	-0.928795	0.166909	-0.0743442	-0.39277
AT4G23750	-1.26198	-0.522442	-0.786465	-0.860712	-0.478632	-0.00311447	-0.816902
AT5G65090	2.18459	1.065	1.84864	1.21718	-0.00609633	-0.342043	0.146084
AT2G46410	0.0999636	0.501165	-0.0564119	0.421049	0.0282301	-0.128145	-0.0518861
AT1G18320	-0.146005	0.0375941	-0.476074	0.209592	-0.0680655	-0.398134	0.103932
AT2G20320	0.678466	-0.303285	-0.273433	-2.07338	0.717211	-0.234687	-1.05289
AT5G66640	0.800999	0.531573	-0.542281	-0.925796	0.470075	-0.873205	-0.987294
AT1G17500	1.16302	0.227276	-0.165718	-1.18531	0.932486	-0.396254	-0.480099
AT3G45830	0.521138	-0.36549	-0.429247	-1.83137	0.81652	-0.133864	-0.649359
AT5G41060	-1.31955	-0.499832	-1.04299	-0.264685	0.0809357	0.357497	0.316083
AT2G33330	-2.04734	-0.59067	-1.38527	0.037933	-0.0430767	0.618993	0.585526
AT3G24020	0.875604	0.000702994	-0.277126	-0.220608	0.285464	-0.867266	0.0641533
AT1G15380	-0.0362088	0.46737	-0.354916	0.781012	0.0301736	-0.288534	0.343815
AT1G71460	-0.558848	-0.468804	-0.567942	-0.6267	0.179411	0.170317	0.0215148
AT3G56250	-0.0121971	0.118628	-0.369405	-0.623605	0.14179	-0.215418	-0.600443
AT5G51630	0.15167	-0.323725	-0.366435	-1.25723	0.55745	0.0393441	-0.37606
AT3G19250	0.835018	0.298441	0.594106	0.459598	-0.179237	-0.420149	-0.0180801
AT5G26160	0.565089	-0.147139	-0.12579	-0.784547	0.458215	-0.232664	-0.179193
AT5G45790	0.259715	-0.0492939	-0.0399119	0.0870046	0.482588	0.182961	0.618887
AT1G68940	-0.0109914	-0.151667	-0.437265	-0.356304	0.255213	-0.171061	0.0505751
AT1G18910	0.228921	-0.0670308	0.202418	-0.369961	0.286951	0.260448	-0.0159787
AT2G43580	1.71877	1.42352	3.7448	2.56272	-1.47948	0.546551	-0.340285
AT3G57700	23.3909	22.7876	6.11019	6.27918	17.1076	-0.173094	-0.406845
AT1G70060	0.385226	-0.554511	-0.78755	-1.97243	1.18162	0.00884545	-0.236295
AT1G57700	0.414133	-0.256816	-0.256722	-1.45012	0.266478	-0.404377	-0.926826
AT2G47220	-0.0963118	-0.274851	-0.455182	-1.17708	0.408856	0.0499861	-0.493372
AT3G21330	-0.786068	-0.262811	-0.418428	-0.551974	-0.0964511	0.271189	-0.385614
AT5G02320	0.172021	-0.0735289	-0.0866488	-1.00466	0.352149	0.0934794	-0.578987
AT2G26560	2.06214	1.84557	2.88952	2.54235	0.0506941	0.87807	0.747472
AT2G46590	-0.0835706	-0.0304245	0.0905692	0.353513	-0.128036	0.046104	0.255901
AT3G19190	0.887172	0.160885	0.105278	-1.37678	0.874786	0.0928919	-0.662879
AT5G24750	0.204754	-0.0779043	-0.269076	-0.17514	0.0396533	-0.434177	-0.0575824
AT5G57190	0.535182	0.0643941	0.188511	0.115618	-0.0109867	-0.357658	0.0402374
AT1G80280	1.07543	0.857695	0.0127074	-0.275685	-0.248275	-1.311	-1.38166
AT1G48370	1.63794	1.37043	1.15199	1.29941	0.190784	-0.295165	0.119772
AT5G38770	0.264691	0.790211	0.976666	0.936193	-0.714591	-0.00261642	-0.568609
AT3G56640	0.220078	-0.312131	-0.412259	-1.69899	0.423156	-0.209181	-0.963699
AT2G04033	-0.731439	-0.710002	0.257802	0.983532	-0.519638	0.469603	1.1739
AT5G05160	0.450435	-0.354913	-0.1266	-1.77559	0.072281	-0.504754	-1.34839
AT5G63650	0.439796	-0.150117	-0.208207	-0.962279	0.316692	-0.331311	-0.49547
AT4G38380	-0.178738	-0.218534	-0.519007	-0.523741	0.195426	-0.144843	-0.109781
AT3G58820	-0.417503	-0.593611	-0.438518	0.0700551	-0.123758	-0.144772	0.539909
AT2G42395	-0.51978	0.0498263	0.220028	0.578825	-0.25437	0.485438	0.274629
AT2G44370	3.29544	2.21348	4.8291	3.97471	-1.13982	0.393832	0.621401
AT5G45650	-0.81594	-1.14046	-1.22841	-2.0319	0.677222	0.264756	-0.214214
AT2G02410	-0.297852	-0.276215	-0.185726	0.163503	0.14212	0.254246	0.581838
AT5G23240	2.62529	-1.34761	3.19992	0.897834	-1.81715	-1.24253	0.428289
AT2G31270	0.0771352	0.0873485	0.147134	-0.0327467	-0.0953534	-0.0253545	-0.215449
AT4G09920	-0.532526	-0.253535	-0.052951	0.523048	-0.309789	0.169786	0.466794
AT1G19830	0.282523	0.951697	-1.5741	1.29006	-0.0441073	-1.90073	0.294254
AT5G54710	0.23524	-0.0484121	-0.36097	-1.10475	0.750724	0.154515	-0.30561
AT5G48040	-0.22116	-0.229634	-0.662345	-0.681236	0.113788	-0.327397	-0.337814
AT5G07610	-0.363755	-0.151761	-0.198234	0.201273	-0.0337439	0.131777	0.319291
AT4G13190	2.41688	0.774639	1.28317	1.00158	0.0810096	-1.0527	0.307947
AT4G39230	1.0407	0.0908463	0.673614	-0.862232	0.114558	-0.25253	-0.838521
AT4G12840	0.102917	-0.214181	-0.210239	-0.143733	0.4477	0.134544	0.518147
AT4G33620	0.400292	-0.197933	-0.0303472	-1.01726	0.578728	0.148088	-0.240597
AT1G24090	0.531116	0.619048	1.48907	1.50032	-0.400833	0.557119	0.480442
AT1G73010	0.944522	0.483055	1.63259	0.944628	-0.517947	0.170121	-0.056374
AT4G37620	0.479582	0.919802	0.845709	0.814574	-0.177283	0.188844	-0.28251
AT1G69900	-0.0154415	0.743569	-0.101514	0.0286028	0.301746	0.215673	-0.41322
AT5G67310	5.73471	3.64492	3.47002	2.35975	1.13323	-1.13147	-0.151946
AT4G03230	0.505611	-0.374365	-0.591815	-0.860866	0.443971	-0.653455	-0.0425307
AT2G07739	-0.0112671	-0.640869	0.149644	0.926632	-0.0750525	0.0858581	1.49245
AT4G15850	0.04854	-0.286182	-0.791088	-1.36259	0.518874	-0.320754	-0.55754
AT1G64300	0.309772	-0.153262	-0.181459	-0.537936	0.322841	-0.16839	-0.0618323
ATCG00350	-0.501175	-0.646301	-1.3758	-1.5348	0.524825	-0.349803	-0.363677
AT5G38280	1.8675	0.555075	1.40904	0.387691	0.0408879	-0.417573	-0.126496
AT5G13920	-0.34532	-0.26674	-0.0780672	0.126436	-0.147722	0.119531	0.245455
AT5G27030	0.248991	-0.284355	-0.327554	-2.33227	0.646996	0.0704514	-1.40092
AT5G45469	-0.740253	0.0586791	-0.673848	0.321448	0.0762004	0.142606	0.33897
AT5G09690	0.45985	0.108615	-0.648811	-0.887624	0.601036	-0.507625	-0.395203
AT4G26670	-0.530306	-0.0859355	0.0946522	0.982452	-0.435648	0.18931	0.63274
AT2G24440	-0.151785	0.247079	-0.323678	0.126025	0.345391	0.173499	0.224338
AT4G36280	0.0636877	-0.0663384	-0.118491	-0.584357	0.0284077	-0.153771	-0.489611
AT5G59240	0.909753	0.914952	0.631383	0.899883	-0.0449029	-0.323273	-0.0599727
AT3G07610	0.504334	0.0238083	-0.441936	-1.57927	0.926498	-0.019773	-0.676578
AT1G62400	0.0607411	-0.0455758	-0.345552	-1.10822	0.183288	-0.223004	-0.879355
AT5G17850	0.917774	0.775662	0.999339	0.98933	-0.0241689	0.0573957	0.189499
AT1G47578	-0.450457	-0.353789	-0.862036	-0.333265	0.164516	-0.247062	0.18504
AT2G02980	-0.646944	-0.549398	-0.293429	-0.0352949	0.180273	0.533788	0.694375
AT2G27140	0.171662	-0.0879052	0.17742	-0.346214	0.223576	0.229334	-0.034733
AT2G38440	0.432767	-0.438029	-0.690167	-2.4929	1.00286	-0.120074	-1.05201
AT1G72730	0.149664	-0.219246	-0.0886818	-0.31822	-0.0641928	-0.302539	-0.163167
AT4G14860	-0.494649	0.360969	-0.34574	0.429282	-0.170044	-0.0211353	-0.101732
AT2G03540	1.39014	0.628676	-0.366159	-0.270643	0.921881	-0.83442	0.0225621
AT5G66455	-0.0113899	0.0703423	-0.0260429	0.6319	-0.147344	-0.161997	0.414214
AT5G16340	0.498073	0.20361	-0.481421	-0.632354	0.499375	-0.480119	-0.336589
AT1G67600	-0.25679	0.173458	0.0518292	0.660037	-0.00466581	0.303953	0.481913
AT2G38823	-0.514774	-0.239594	-0.23804	0.200451	-0.137783	0.138951	0.302261
AT1G05910	0.354326	-0.308157	-0.456379	-2.13525	0.571229	-0.239476	-1.25587
AT2G25220	0.550606	1.02819	-0.414185	0.607775	0.444754	-0.520037	0.0243351
AT1G14660	0.302172	0.147609	-0.346557	-0.396094	0.378325	-0.270404	-0.165378
AT4G36610	3.24658	1.20576	5.04555	2.61981	-2.83552	-1.03655	-1.42147
AT5G04230	-0.542722	-0.51239	-0.748667	-1.56821	0.420943	0.214998	-0.634872
AT5G66080	-0.379912	0.666284	-0.648886	0.19767	0.243221	-0.0257542	-0.225393
AT5G65300	2.07299	1.54851	1.14166	1.04738	0.848402	-0.0829298	0.347276
AT3G61800	0.675894	-0.421836	-0.540896	-1.43876	0.689616	-0.527174	-0.327308
AT1G21610	0.228508	-0.33373	-0.476856	-1.57147	0.691317	-0.0140471	-0.546427
AT5G62820	0.0877176	0.025467	0.65991	0.475818	-0.409358	0.162835	0.0409934
AT5G65460	-0.263189	-0.826494	-0.969343	-2.06394	0.61565	-0.0905048	-0.6218
AT1G27960	0.08403	-0.19979	-0.216507	-0.166678	-0.0634019	-0.363939	-0.03029
AT2G02790	0.192516	-0.750019	-0.648198	-1.98267	0.630992	-0.209721	-0.601656
AT5G45260	0.35799	-0.43774	-0.504567	-1.67954	0.685374	-0.177183	-0.55643
AT2G28360	0.558751	-0.376474	-0.391791	-1.51816	0.58239	-0.368153	-0.559292
AT5G64530	-0.113918	-0.204101	0.110405	-0.00081425	-0.25989	-0.0355668	-0.0566028
AT1G07880	0.370042	-0.0137096	0.174678	-0.0129636	0.109575	-0.0857892	0.110321
AT3G60110	0.34369	-0.21738	-0.193319	-1.28359	0.448012	-0.088997	-0.618196
AT4G19650	-0.275115	-0.255597	-0.178868	-0.216854	0.172542	0.26879	0.211285
AT2G36370	0.268074	-0.134217	-0.0971297	-0.524669	0.3356	-0.029604	-0.0548524
AT3G45650	-0.138519	-0.267147	-0.911612	-1.04108	0.559143	-0.21395	-0.214792
AT3G44560	7.80554	7.58104	18.7984	18.6946	-15.6099	-3.61104	-3.49041
AT2G15220	0.51778	0.76482	0.391196	0.865203	-0.076622	-0.203206	0.0237612
AT2G42010	0.333723	-0.149562	-0.421359	-1.68908	0.679055	-0.0760271	-0.860462
AT5G28626	-0.501504	0.0540404	-0.216987	0.341639	-0.0778146	0.206702	0.209784
AT5G46220	-1.74069	-0.715622	-1.21828	-0.41316	0.377087	0.899504	0.67955
AT1G43910	1.06705	1.70956	1.08447	1.49683	-0.224018	-0.206593	-0.436749
AT1G34065	-0.786389	-0.252832	-0.400134	0.483752	-0.0599402	0.326314	0.676643
AT3G57300	0.364932	-0.67447	-0.694178	-2.72474	0.990079	-0.0690312	-1.06019
AT4G37250	0.0821309	-0.215734	-0.392372	-1.08919	0.467122	-0.00738057	-0.406331
AT3G03855	1.09378	0.44044	0.806786	-0.296892	0.390476	0.10348	-0.346855
AT5G42800	5.08591	5.24716	5.19971	5.69139	-0.575521	-0.461717	-0.131286
AT2G28160	0.476269	0.332368	0.896908	1.11984	-0.142985	0.277655	0.644489
AT3G26680	0.0399797	0.225127	-0.181722	0.270222	0.0757506	-0.145951	0.120845
AT5G47820	0.382266	-0.582965	-0.564645	-2.15819	1.00906	0.0621464	-0.566163
AT3G05360	1.75226	0.821265	0.746731	0.0695175	0.40788	-0.597646	-0.343867
AT2G38110	0.7378	0.542443	0.38043	0.215039	-0.336552	-0.693922	-0.663956
AT1G26570	-0.468511	-0.273712	-0.783833	-1.15715	0.333789	0.0184669	-0.549646
AT2G32235	-0.446168	0.0856291	0.138352	1.37916	-0.682687	-0.0981673	0.610848
AT3G25730	0.514053	0.20185	0.411744	0.0310307	0.077084	-0.0252253	-0.0937356
AT3G26910	0.647909	-0.0244441	0.0641379	-1.6884	0.504348	-0.0794228	-1.15961
AT1G52620	-0.0264559	-0.0918361	-0.312233	-0.505738	0.295248	0.00947032	-0.118654
AT3G56570	-0.416257	-0.162385	-0.563695	-0.653516	0.253963	0.106525	-0.237167
AT5G05180	0.426599	-0.0701999	0.182407	-0.598345	0.425349	0.181157	-0.102796
AT4G34930	-0.037173	-0.0481946	-0.322158	0.0830182	0.372213	0.0872278	0.503425
AT5G17370	0.41516	-0.0459894	-0.184788	-0.717489	0.688816	0.0888674	0.0173163
AT3G06455	-0.211213	-0.20218	-0.504009	-1.10678	0.416511	0.123715	-0.488086
AT4G20400	0.206291	-0.601685	-0.644191	-2.10139	0.785817	-0.0646646	-0.713886
AT1G78530	1.69585	0.302838	2.24498	0.812941	-0.0942113	0.45492	0.415892
AT1G06740	-0.0169515	-0.394952	-0.609607	-0.942959	0.329622	-0.263033	-0.218385
AT1G21650	0.155701	-0.531877	-0.509115	-1.26651	0.354017	-0.3108	-0.380616
AT3G57430	0.275412	-0.290964	-0.465453	-1.08364	0.439207	-0.301658	-0.353467
AT2G38770	0.206305	-0.383401	-0.804759	-1.84286	0.839109	-0.171955	-0.620349
AT5G40330	-0.203442	0.344232	-0.24397	0.341915	0.201866	0.161337	0.199549
AT1G22065	0.398951	0.588603	0.718863	1.20073	-0.0747908	0.245121	0.537338
ATCG00660	-0.971536	-0.0602045	-0.0135316	0.307119	-0.537258	0.420746	-0.169935
AT1G74160	0.140319	-0.729655	-0.60556	-2.07968	0.732961	-0.0129176	-0.617067
AT3G29250	4.06179	3.36721	4.30685	3.75605	-0.965775	-0.720713	-0.576945
AT3G27870	0.0597642	-0.371974	-0.29454	-0.620691	0.184923	-0.169381	-0.0637928
AT5G16980	-0.0567841	-0.136076	-0.200229	0.435626	-0.323488	-0.466933	0.248215
AT4G03250	-0.0142566	-0.370375	-0.601838	-1.22213	0.455974	-0.131608	-0.395781
AT4G19560	-0.24389	-0.204963	-0.326802	-0.280307	0.366035	0.283123	0.29069
AT5G34790	0.567357	0.424457	-0.582772	-1.43028	0.547895	-0.602234	-1.30684
AT4G40085	0.0515562	0.51095	0.215319	0.295084	0.288091	0.451853	0.072225
AT1G63490	0.265132	-0.514107	-0.48643	-1.84455	0.62596	-0.125601	-0.704487
AT3G46920	0.485102	-0.315153	-0.643601	-2.15074	1.00411	-0.12459	-0.831472
AT2G28140	2.55984	1.76946	2.95936	2.17714	-0.439373	-0.0398563	-0.0316915
AT1G47410	-0.563588	-0.342577	-0.2115	-0.304544	0.15238	0.504467	0.190413
AT1G26762	0.339205	0.103285	1.0622	0.664333	-0.22111	0.501888	0.339937
AT1G07490	-1.37373	-0.689267	-0.030149	0.770584	-0.278011	1.06557	1.18184
AT1G27420	0.39761	-0.0154774	-0.627487	-0.413949	0.169154	-0.855944	-0.229318
AT2G45080	-0.753124	0.44064	-0.684887	1.07835	-0.242369	-0.174131	0.395344
AT2G46200	0.265008	-0.121008	-0.36455	-0.836786	0.571336	-0.0582217	-0.144441
AT1G51370	-0.148972	-0.256573	-0.33146	-0.335076	0.322322	0.139834	0.243819
AT4G32000	-0.894524	-0.641822	-0.843897	-0.607612	0.0749493	0.125576	0.10916
AT3G22961	-0.0625717	0.697271	0.503351	0.861427	0.195023	0.760945	0.359179
AT2G16250	0.0652291	0.0621654	-0.230585	-0.442887	0.257413	-0.0384016	-0.247639
AT2G25350	0.336608	-0.680259	-0.442628	-1.6433	0.747372	-0.0318646	-0.215673
AT2G34925	-1.83726	-0.560154	-1.09172	0.201054	-0.276525	0.469019	0.484683
AT3G54000	0.329493	0.145724	-0.452919	-0.628437	0.277347	-0.505065	-0.496814
AT3G02120	0.19365	0.402491	1.10592	0.385343	-1.05998	-0.14771	-1.07713
AT3G15400	-0.113678	-0.592104	-0.834691	-1.75464	0.436833	-0.28418	-0.725699
AT2G43000	2.1252	1.2114	2.12299	0.0707838	-0.450782	-0.452984	-1.59139
AT5G17880	0.595922	0.0761404	-0.0890788	-1.25793	0.88539	0.200389	-0.448684
AT1G31240	0.274925	-0.0541691	-0.0516676	-0.338822	-0.0305736	-0.357166	-0.315226
AT4G10890	-0.225455	-0.218394	-0.344409	-0.562016	0.439511	0.320557	0.0958891
AT1G55020	0.285854	-1.09238	-0.943937	-2.26082	0.461689	-0.768102	-0.706746
AT5G66540	0.408543	-0.478603	-0.643163	-1.84617	0.596485	-0.455221	-0.771084
AT4G37730	0.429244	0.31476	0.115877	0.152999	-0.288489	-0.601856	-0.45025
AT3G04220	3.92173	3.00896	3.53986	2.43066	0.141765	-0.240099	-0.436541
AT4G37710	23.9442	22.8404	23.2945	22.7573	0	0.356352	-0.0831028
AT1G73700	-0.220667	-0.0598631	0.15017	0.148876	-0.275164	0.0956734	-0.066425
AT5G22690	0.494845	-0.0619301	-0.37902	-0.882461	0.426818	-0.447047	-0.393714
AT5G20320	0.586687	-0.160157	-0.0398614	-1.69043	0.646794	0.0202457	-0.883483
AT5G64450	0.488988	0.449145	-0.318277	0.0835175	0.677282	-0.129982	0.311654
AT1G01770	0.412603	-0.4779	-0.249164	-1.42714	0.505873	-0.155895	-0.44337
AT1G04300	0.283867	-0.490767	-0.598819	-2.46638	1.00403	0.121345	-0.971579
AT1G73890	-0.191795	-0.365765	-0.27141	-0.104128	0.0833126	0.00369742	0.34495
AT4G31880	0.593625	-0.444504	-0.516292	-2.52202	0.999458	-0.110459	-1.07805
AT5G38730	-0.201319	-0.0574726	-0.0778804	0.160626	0.0767122	0.200151	0.294811
AT2G37930	-0.371925	-0.55935	-0.671019	-1.25626	0.368812	0.0697181	-0.3281
AT4G33160	0.746049	0.00898518	0.370464	-0.105248	-0.158076	-0.53366	-0.272309
AT3G25020	1.39283	1.06477	1.61727	0.129238	0.151126	0.375562	-0.784407
AT2G41510	0.224761	-1.40682	-1.45894	-2.20121	0.781885	-0.901812	-0.0125052
AT2G32280	1.89644	0.944908	3.91261	3.41569	-1.51235	0.503817	0.958435
AT1G74360	2.14338	0.586972	1.09255	-0.550265	0.742216	-0.308621	-0.395021
AT1G30010	0.0105096	-0.19082	-0.452991	-0.754744	0.136726	-0.326774	-0.427197
AT1G77855	-0.842016	-0.154914	-0.351364	0.0790621	-0.237069	0.253583	-0.00309348
ATCG01070	-1.6233	-0.444354	-0.0303404	0.361422	-0.490495	1.10247	0.315281
AT2G32765	-0.691588	0.220989	-0.1106	1.10605	-0.410249	0.170739	0.474811
AT1G05100	2.20576	1.47868	2.28238	0.920158	-0.348233	-0.271618	-0.906759
AT4G03440	0.0487252	-0.160297	-0.317894	-0.999541	0.286518	-0.080101	-0.552726
AT4G16745	0.251199	-0.0835044	-0.26542	-1.07966	0.126259	-0.39036	-0.8699
AT5G43820	0.414563	0.240006	0.312962	0.0823752	0.191524	0.0899234	0.0338937
AT5G27270	0.283128	-0.336329	-0.824041	-1.80748	0.869116	-0.238053	-0.602035
AT2G44440	-0.1892	-0.621132	-0.711928	-1.71177	0.0652286	-0.457499	-1.02541
AT5G08780	-0.20157	-0.702693	-1.08155	-1.80553	0.723782	-0.156202	-0.379051
AT4G39403	0.222841	-0.1657	0.0887149	-0.75123	0.274601	0.140474	-0.310929
AT3G11080	1.73249	0.911542	0.96203	-0.320622	0.281217	-0.489239	-0.950946
AT2G11880	-0.33879	-0.224124	-0.0475797	-0.311493	0.681933	0.973143	0.594564
AT1G56120	2.01158	2.12615	1.67094	0.590258	0.750247	0.409601	-0.785647
AT3G09230	0.0611022	-0.112185	-0.400166	-0.822746	0.36493	-0.0963383	-0.345631
AT1G49370	2.75795	1.6867	2.03953	1.7128	0.117637	-0.600779	0.143743
AT3G02160	0.0302372	-0.109189	-0.209584	-0.348157	0.313919	0.0740976	0.0749511
AT3G28857	-0.444676	-0.321113	-0.332944	0.887887	0.2045	0.316232	1.4135
AT5G49960	-0.272308	-0.482649	-0.537732	-1.01154	0.429554	0.16413	-0.0993388
AT3G25670	-1.26811	-0.422479	-0.995356	-0.155108	0.287131	0.559885	0.554502
AT5G60440	1.08595	0.924029	1.40016	1.40943	-0.339697	-0.0254895	0.145707
AT1G55820	0.147881	-0.364278	-0.262742	-1.03316	0.138436	-0.272188	-0.530442
AT4G10270	-0.120707	0.600954	0.95401	1.13434	-0.436249	0.638467	0.0971361
AT1G06370	-0.282679	-0.00169536	-0.345501	-0.405811	0.108017	0.0451946	-0.296098
AT4G25835	0.299648	-0.16448	-0.135057	-0.046027	0.540654	0.105948	0.659106
AT4G15233	2.57375	2.13592	2.50242	1.37384	0.510179	0.438849	-0.251902
AT3G45880	-0.208819	0.161498	-0.238713	0.493293	-0.208138	-0.238033	0.123657
AT4G05053	-0.215122	0.2628	0.195497	0.0160825	-0.123328	0.287291	-0.370045
AT3G52520	0.177504	0.850583	-0.722193	0.307293	0.0849277	-0.814769	-0.458363
AT3G52680	-0.345627	0.0726989	0.106088	0.53664	-0.109851	0.341864	0.35409
AT4G30180	1.14865	0.929173	0.223603	0.463985	0.401937	-0.523113	-0.0632521
AT1G16780	-0.38472	-0.530633	-0.977182	-0.833365	0.265263	-0.327199	-0.0374692
AT1G02430	-0.0345455	-0.227397	-0.455264	-0.455333	0.32221	-0.0985088	0.0942732
AT2G02120	1.4964	1.27198	0.739901	0.677859	0.221296	-0.535202	-0.372822
AT3G57600	0.235304	0.431847	0.340553	0.45725	0.0122493	0.117499	0.0376521
AT1G64210	4.91139	4.56409	4.19614	3.22134	0.671321	-0.0439313	-0.671427
AT5G04860	0.706966	-0.28708	-0.359608	-1.7722	0.751493	-0.31508	-0.73363
AT3G26782	0.176673	-0.0201268	-0.153725	-0.0825268	0.16457	-0.165828	0.10217
AT3G56000	0.208167	0.114786	-0.177423	-0.093828	0.297764	-0.0878258	0.0891501
AT5G38870	0.201764	0.0766389	-0.630127	-2.02834	1.13116	0.299269	-0.973824
AT1G34100	-0.086064	-0.0705157	-0.545462	0.0149675	-0.017806	-0.477204	0.0676772
AT2G45830	0.138422	0.147194	-0.057325	0.0084777	0.0904746	-0.105272	-0.0482414
AT5G09445	-0.246005	0.686526	-0.272298	0.745498	0.123544	0.0972509	0.182516
AT2G28650	0.738633	0.556304	0.436609	0.629097	-0.0199364	-0.321961	0.0528567
AT3G19740	0.458422	-0.131786	-0.551114	-2.21007	0.922795	-0.0867408	-1.15549
AT3G28455	-0.68671	-0.40435	-0.437347	-0.145704	-0.123601	0.125762	0.135045
AT1G14687	-1.00189	-0.268142	-0.368692	0.232579	-0.241591	0.391605	0.25913
AT1G79190	0.123771	-0.157729	-0.175054	-1.39847	0.485825	0.187	-0.754911
AT2G34300	0.672368	-0.0920251	-0.415541	-1.00097	0.562115	-0.525794	-0.346827
AT1G13170	-0.155173	-0.455139	-0.917841	-1.32243	0.398693	-0.363975	-0.468603
AT1G48315	-0.551754	-0.185936	-0.370258	0.25735	0.0582001	0.239696	0.501486
AT5G12300	0.397105	-0.0233871	0.371318	-0.442707	0.12928	0.103492	-0.29004
AT4G19850	0.432657	0.293146	0.110652	0.670408	0.291469	-0.0305367	0.668732
AT5G49530	0.585395	0.0355039	-0.359811	-1.44733	0.498034	-0.447172	-0.984795
AT3G22100	-0.0830161	-0.328566	0.375831	-0.141393	0.00679453	0.465642	0.193967
AT4G09950	0.065103	-0.130314	0.20985	0.0567255	0.18112	0.325867	0.36816
AT1G30410	1.28941	0.454395	0.71713	-0.515141	0.533796	-0.0384815	-0.435741
AT2G40815	0.00128579	-0.434762	-0.418831	-0.673195	0.165997	-0.254119	-0.0724351
AT1G07615	0.227994	-0.22906	-0.786217	-1.63029	0.565473	-0.448738	-0.83576
AT2G01950	-0.421994	-0.671137	-0.351428	-0.944182	-0.184814	-0.114248	-0.457859
AT3G23290	-0.327476	-0.28644	-0.658005	-0.218322	0.155044	-0.175485	0.223162
AT2G14220	0.0812781	-0.247149	-0.3893	-1.00625	0.379423	-0.0911551	-0.379682
AT2G44255	-0.211034	-0.355619	-0.160291	-0.817559	-0.176332	-0.125589	-0.638273
AT2G48030	0.478802	0.674762	0.263414	-0.0145791	0.230254	0.0148662	-0.459087
AT4G10070	0.153553	-0.112862	-0.596985	-1.32186	0.50212	-0.248419	-0.706874
AT5G18475	-0.373824	-0.288115	-0.316993	-0.341005	-0.0463855	0.010445	-0.0992754
AT4G23590	5.92488	4.56826	5.28148	3.51303	-0.185406	-0.828808	-1.24064
AT3G17580	1.00802	0.66544	0.852672	1.1364	-0.52274	-0.678084	-0.0517847
AT1G77120	0.194337	-0.529319	-0.590362	-0.456692	0.154593	-0.630106	0.22722
AT2G30424	-1.73787	-0.671711	-0.21926	0.619446	-0.436077	1.08253	0.855081
AT1G75480	1.13735	-0.0154784	0.0360245	0.683837	0.165132	-0.936192	0.864447
AT4G18250	2.31165	2.85545	2.6621	3.50643	-0.096501	0.253949	0.554479
AT2G25320	0.15443	-0.367864	-0.487059	-2.17442	0.633465	-0.00802449	-1.17309
AT3G15357	0.207975	0.319646	1.22136	1.60047	-0.939259	0.0741226	0.341566
AT2G36770	2.04243	1.47919	2.16001	1.42617	0.168578	0.286153	0.115558
AT4G15820	-0.155024	-0.482093	-0.96258	-1.54464	0.670336	-0.13722	-0.392211
AT3G16020	1.52886	1.26413	-1.20713	-1.0496	1.00505	-1.73094	-1.30868
AT2G25640	-0.035783	-0.0713003	-0.557241	-1.06106	0.37555	-0.145907	-0.614211
AT4G33985	1.14858	0.926032	0.691406	0.992923	-0.0510281	-0.508199	0.0158631
AT3G27630	-1.41047	-0.821279	-0.662426	0.633963	-0.510457	0.237591	0.944786
AT2G21090	0.0875892	-0.149756	-0.413296	-0.841395	0.0906803	-0.410205	-0.600959
AT2G41820	-0.229766	-0.579881	-0.722973	-1.50051	0.227314	-0.265894	-0.693314
AT2G42510	-0.295414	-0.231753	-0.564588	-0.479948	0.312752	0.0435781	0.0645576
AT5G09790	-0.208163	0.0168363	-0.847809	-0.48262	0.31754	-0.322106	-0.181917
AT5G01640	0.592453	0.486232	0.780792	0.582165	-0.226307	-0.0379684	-0.130374
AT4G26960	-1.10282	0.0797569	-0.297844	0.721001	-0.319781	0.485195	0.321463
AT5G56890	-0.199554	-0.490491	-0.535413	-1.42337	0.352256	0.016397	-0.580622
AT4G22680	2.48701	1.07334	2.85915	1.69118	-0.0693222	0.302824	0.548519
AT1G54200	-0.43386	-0.370036	-0.331084	-0.786558	0.107776	0.210552	-0.308746
AT1G17190	-1.16012	-0.323924	-0.743988	0.208215	-0.224569	0.191567	0.307569
AT3G03060	-0.363704	-0.224565	-0.321033	-0.68287	-0.103883	-0.0612128	-0.562189
AT1G08410	0.678122	-0.376984	-0.490473	-1.4421	0.805945	-0.36265	-0.259167
AT5G38690	-0.368583	-0.820808	-0.606797	-1.13622	0.521454	0.283241	0.206043
AT1G16690	0.0872076	-0.304769	-0.44417	-0.950946	0.281411	-0.249966	-0.364765
AT5G08550	0.0814528	-0.540121	-0.421054	-1.81631	0.366929	-0.135579	-0.909256
AT3G23010	0.659841	0.464062	1.17829	0.699189	0.351363	0.869811	0.58649
AT2G21080	-0.541838	-0.1131	-0.453339	-0.136364	0.168144	0.256642	0.144879
AT4G12770	0.425088	-0.317783	-0.376827	-1.72165	0.551509	-0.250406	-0.852359
AT2G34090	0.774316	0.762513	0.374784	0.821091	0.0910179	-0.308514	0.149596
AT5G10605	0.00382651	-0.0475075	0.290542	-0.20095	-0.0663113	0.220404	-0.219754
AT3G21950	-1.94576	-0.569178	-1.28053	-0.95514	0.365126	1.03036	-0.0208358
AT1G56520	-0.491099	-0.321435	-0.503946	-0.826549	0.23071	0.217863	-0.274404
AT5G07740	0.444437	0.0288257	-0.441639	-1.50612	0.72724	-0.158836	-0.807701
AT5G61920	-0.193797	-0.339498	-0.0506335	-0.540557	0.255072	0.398235	0.0540124
AT3G01370	-0.117016	-0.510205	-0.741773	-2.3033	0.637921	0.0131637	-1.15517
AT5G02250	-0.186502	-0.368662	-0.79227	-1.96545	0.618217	0.0124489	-0.978566
AT3G13857	0.368126	1.25483	1.16674	0.874524	-0.131565	0.667045	-0.511874
AT1G16820	-0.463446	-0.249555	-0.818386	0.121839	0.3099	-0.0450401	0.681294
AT3G20480	-0.222853	0.189105	-0.462697	0.123941	0.271663	0.0318198	0.206499
AT4G18970	-1.96865	-1.00943	-1.84778	-1.47344	0.429236	0.550105	-0.0347748
AT3G13782	1.37144	0.742277	1.23745	0.712581	0.143252	0.00925788	0.113556
AT1G16270	0.318649	-0.391886	-0.599128	-1.59683	0.681284	-0.236493	-0.523658
AT4G21400	0.771524	0.0901806	0.113026	-0.442987	0.564254	-0.0942437	0.0310869
AT1G21695	0.328983	0.107574	0.485479	0.712083	-0.670039	-0.513542	-0.0655295
AT1G15080	-0.210772	-0.12485	-0.127626	0.227025	-0.151875	-0.0687285	0.2
AT1G61210	-0.0262291	-0.213607	-0.395182	-1.49015	0.673403	0.30445	-0.603136
AT5G22450	0.656127	-0.374081	-0.545674	-2.49187	1.15506	-0.0467368	-0.962723
AT1G28350	0.448967	-0.657438	-0.669932	-1.71993	0.561479	-0.55742	-0.501012
AT2G33060	-0.166707	-0.774965	-0.736906	-1.29432	0.342399	-0.227801	-0.176956
AT5G50390	-0.111675	-0.219565	-0.630889	-0.758569	0.293451	-0.225763	-0.245553
AT5G42010	0.693132	0.380674	0.351533	0.0287455	0.122024	-0.219575	-0.229904
AT1G34260	0.44162	-0.455167	-0.42984	-2.06479	0.843809	-0.0276508	-0.765816
AT4G18375	-0.153507	-0.230589	-0.393496	-0.305691	0.310245	0.0702563	0.235143
AT1G12672	-0.827551	-0.262065	-0.254774	0.644553	0.0649541	0.637732	0.971572
AT5G16080	1.97549	1.1036	0.86545	0.730349	-0.347346	-1.45739	-0.7206
ATCG00360	-0.248006	-0.535404	0.0957365	0.120155	-0.0265366	0.317205	0.629022
AT2G47240	0.371152	-0.736855	-0.33554	-1.38978	0.492541	-0.214152	-0.160389
AT2G35710	0.851566	1.30932	0.117223	0.469879	0.484493	-0.24985	-0.354949
AT4G21410	0.234126	-0.422348	-0.356531	-1.24165	0.501011	-0.0896459	-0.318294
AT1G05750	0.0232235	-0.0682761	-0.0949066	-0.408322	0.1323	0.01417	-0.207746
AT5G01380	5.69059	4.83182	2.26117	0.719595	3.07199	-0.35743	-1.04024
AT3G01610	0.175715	-0.300482	-0.613277	-1.68828	0.565223	-0.223768	-0.822576
AT2G25420	-0.088951	-0.22462	-0.221405	-0.21043	0.0644615	-0.0679929	0.0786515
AT1G08620	0.506784	-0.455794	-0.424731	-2.15751	0.839747	-0.091768	-0.861968
AT5G07030	0.737521	0.600708	1.23662	0.508374	-0.421099	0.0780009	-0.513434
AT1G27595	0.0330643	-0.417619	-0.6817	-1.4079	0.491445	-0.223319	-0.498836
AT5G24080	2.23492	-0.0757708	2.18843	0.518771	-0.811518	-0.858007	-0.216977
AT1G18190	0.218461	-0.427377	-0.547706	-1.36006	0.681892	-0.0842751	-0.250796
AT3G20865	-0.784828	-0.122612	-0.450696	0.5679	0.122974	0.457105	0.813486
AT1G18250	0.642319	0.0713065	1.26619	0.974266	-0.51477	0.1091	0.38819
AT5G38610	-0.251042	0.217185	0.214592	0.81055	-0.35939	0.106244	0.233976
AT4G15975	1.13781	1.36885	1.46584	1.40992	0.0331993	0.361231	0.0742673
AT5G50780	0.826745	-0.324798	-0.227758	-1.78421	0.770091	-0.284412	-0.689318
AT5G45000	2.63641	2.29646	2.80023	2.05811	0.321189	0.485007	0.0828341
AT5G20980	-0.253222	-0.438653	-0.594704	-0.860335	0.384325	0.0428427	-0.0373569
AT3G26560	0.373613	-0.751661	-0.724559	-2.46894	0.95777	-0.140401	-0.759508
AT2G30945	0.180915	0.391314	0.408163	1.03059	-0.236169	-0.00892138	0.403107
AT1G02990	0.69336	-0.318392	-0.592119	-1.82677	1.03742	-0.248056	-0.47096
AT5G62280	-0.9701	-0.556864	-0.890526	-1.3766	1.2139	1.29347	0.39416
AT1G68810	-0.784745	-0.548835	-0.674524	-0.858025	0.164228	0.274449	-0.144961
AT4G16400	-0.333737	1.04221	-1.2211	-0.0492132	0.356346	-0.531013	-0.735082
AT2G39240	-0.398011	-0.696438	-0.208943	-0.145521	-0.673366	-0.484299	-0.12245
AT5G42920	0.415571	-0.586327	-0.700627	-1.93624	0.794632	-0.321566	-0.555282
AT1G01780	-0.225816	-0.586928	-0.714326	-0.880979	0.133795	-0.354714	-0.160255
AT2G13970	0.369765	-0.201897	-0.642146	-1.57136	0.950827	-0.0610837	-0.418638
AT4G15090	0.0953341	-0.518967	-0.740595	-1.82297	0.584983	-0.250946	-0.71902
AT2G35540	0.377948	0.0561789	-0.0208355	-0.708173	0.323589	-0.0751946	-0.440763
AT5G13460	-0.0556236	-0.695778	-0.935776	-1.90584	0.686825	-0.193328	-0.523233
AT1G64450	0.197348	0.109511	0.044331	-0.322638	-0.381952	-0.53497	-0.814101
AT3G44940	-0.821448	-0.48604	-0.573886	-0.0108148	-0.331941	-0.0843786	0.143284
AT1G16830	0.0138037	0.403575	-0.270525	0.0240126	0.245162	-0.0391659	-0.1344
AT4G16340	-0.0760264	-0.524081	-0.704473	-1.60098	0.511328	-0.117118	-0.565567
AT4G18300	0.228835	-0.3809	-0.348832	-0.995876	0.42422	-0.153447	-0.190756
AT1G79700	0.241941	0.270243	-0.843505	-0.229094	0.367768	-0.717678	-0.13157
AT4G11530	-0.00340886	-0.0541627	0.0846953	-0.0289198	0.176155	0.264259	0.201398
AT3G21560	-0.0699512	-0.019755	-0.2446	-0.581154	0.099761	-0.0748882	-0.461638
AT5G17460	0.437068	0.256708	0.858912	0.687514	-0.0829135	0.338931	0.347893
AT4G04190	0.15535	0.198027	0.796014	1.05154	-0.455741	0.184923	0.397768
AT1G78580	-0.279862	-0.908192	-0.850669	-2.32164	0.498715	-0.0720915	-0.914733
AT5G37570	0.289782	0.338356	0.0113522	0.418143	0.10619	-0.172239	0.185977
AT2G39580	0.272526	-0.34857	-0.335108	-0.992583	0.490276	-0.117358	-0.153737
AT3G29680	0.157662	-0.228028	-0.292684	-0.407501	0.0219726	-0.428374	-0.1575
AT5G16210	0.555986	-0.161824	-0.217476	-1.59605	0.599049	-0.174413	-0.835182
AT3G63070	0.461085	-0.392327	-0.602436	-2.30237	0.926959	-0.136561	-0.983081
AT1G22250	-0.301135	0.337595	-0.503662	0.024955	0.504548	0.302022	0.191909
AT1G74170	0.25338	-0.0667919	-0.048436	-0.163729	0.198531	-0.103285	0.101593
AT1G12480	0.0447349	-0.402551	-0.107151	-0.993684	0.120322	-0.0315637	-0.470811
AT1G67328	0.18754	0.328918	0.455025	0.416281	-0.226277	0.0412076	-0.138913
AT4G21500	-0.509465	0.0258035	-0.668295	0.230582	0.309799	0.150968	0.514577
AT3G55390	0.528448	1.01499	0.503969	1.05577	-0.147939	-0.172418	-0.107153
AT1G58160	-0.621955	0.0889068	-0.158895	0.578037	-0.0689395	0.394121	0.420191
AT3G52790	2.64055	0.0557162	20.7858	19.7744	-20.7802	-1.62898	-0.0555159
AT1G38131	-0.426263	-0.430119	-0.376653	-0.659558	0.0533261	0.102936	-0.176113
AT3G13380	1.35103	0.424082	0.819999	-0.320605	-0.108583	-0.639616	-0.85327
AT5G35753	0.379825	-0.33635	-0.707714	-1.64759	0.745253	-0.342286	-0.565986
AT5G09530	1.54482	-0.288955	0.688569	-0.362822	-0.574365	-1.43062	-0.648231
AT3G11850	0.125849	-0.17044	0.0025617	-0.733209	0.508398	0.385111	-0.0543708
AT5G61040	-0.178611	-0.741137	-0.653528	-1.28715	0.457153	-0.0177641	-0.088856
AT3G63440	-0.327481	-0.483276	-0.987392	-0.858291	0.412831	-0.247079	0.0378169
AT1G23200	0.170068	-0.164535	0.741084	-0.30241	-0.350195	0.220821	-0.48807
AT4G25270	-0.399961	-0.446338	-0.89015	-1.4661	0.426898	-0.0632909	-0.592864
AT5G54200	-0.457018	-0.499124	-0.689704	-1.28754	0.458954	0.226268	-0.329466
AT5G06690	-1.31821	-0.881982	-0.721705	-0.17524	0.218111	0.814617	0.924853
AT4G34160	-0.017909	-0.0545679	0.357497	-0.417959	-0.314981	0.0604249	-0.678372
AT4G12680	0.186586	-0.0488736	-0.630404	-0.836771	0.369415	-0.447574	-0.418482
AT2G47020	0.0378312	-0.220587	-0.232169	-1.18952	0.382343	0.112342	-0.586588
AT1G68400	-0.563655	-0.365776	-0.592925	-1.21124	0.0782154	0.0489451	-0.767252
AT1G35515	0.878202	-0.506745	-0.321556	0.555004	0.105247	-1.09451	1.167
AT5G20225	-0.488837	0.0109519	-0.349972	-0.147974	0.510319	0.649184	0.351393
AT1G23060	2.15761	1.43888	0.862886	-0.436445	0.682391	-0.612337	-1.19294
AT5G46100	-0.353508	-0.204613	-0.210086	-0.331042	0.442574	0.585996	0.316145
AT4G34410	5.63146	3.10619	2.59583	0.593445	2.23916	-0.796469	-0.273589
AT5G64000	1.68912	1.37589	1.56972	1.48187	-0.41616	-0.53557	-0.310189
AT5G61350	-1.3434	-0.971119	-1.00484	-1.03697	0.0685809	0.407138	0.00273276
AT4G02760	0.188784	-0.0203926	0.00130982	-0.0715012	-0.0383929	-0.225867	-0.0895015
AT2G32340	0.0613478	-0.100954	-0.805379	-0.962826	0.724669	-0.142058	-0.137204
AT5G02860	-0.108218	-0.293162	-0.390035	-0.152515	0.236034	-0.0457825	0.376682
AT5G47130	0.767518	0.0710026	1.11528	1.18477	-0.806722	-0.458963	0.307048
AT3G06010	0.0544996	-0.550862	-0.3139	-2.49106	0.58369	0.21529	-1.35651
AT1G53440	0.766101	-0.495811	-0.876458	-2.02334	1.10501	-0.537548	-0.422513
AT2G24960	0.0722912	-0.184822	-0.249486	-0.516647	0.549856	0.228079	0.218031
AT1G23470	0.424226	-0.0271599	-0.536039	0.113365	0.217239	-0.743026	0.357765
AT1G06980	-1.39705	-0.4471	-0.618208	0.127394	-0.940121	-0.161279	-0.365627
AT1G02360	0.0564856	0.352929	-0.338509	-0.138191	0.592134	0.197139	0.101014
AT2G48110	0.354705	0.0255838	-0.251083	-1.24744	0.572338	-0.0334503	-0.700688
AT2G25470	3.09499	1.79872	3.26682	2.1109	-0.0922564	0.0795796	0.219924
AT2G32000	0.00715122	-0.266219	-0.632911	-1.59999	0.583653	-0.0564093	-0.750118
AT2G41130	-0.177769	-0.275826	0.423968	-0.346064	-0.171395	0.430343	-0.241633
AT1G13970	0.504513	-0.103691	-0.0380645	0.0749411	0.207747	-0.33483	0.38638
AT2G33847	0.783911	1.71113	0.561843	1.33271	0.0478889	-0.174178	-0.330538
AT1G24764	0.300881	-0.540241	-0.580882	-2.10166	0.397106	-0.484658	-1.16431
AT2G01890	-1.51841	-0.717699	-1.02921	-1.03122	0.416604	0.905799	0.103082
AT2G18330	0.13609	-0.450099	-0.588967	-1.87749	0.479074	-0.245983	-0.948316
AT3G54750	-0.718683	-0.559986	-0.620144	-0.835471	-0.166474	-0.067935	-0.44196
AT5G02260	0.700122	0.0494096	1.51919	1.59956	-0.789108	0.0299564	0.761045
AT1G75290	1.35442	0.464692	0.674531	-0.150487	0.31349	-0.366401	-0.301689
AT4G23410	0.133669	0.141691	0.0687863	0.12734	0.126195	0.061312	0.111844
AT4G38660	-1.11055	-0.348913	-0.670672	0.0510746	-0.220001	0.219879	0.179987
AT4G05091	1.21951	-0.0476381	-20.6033	-20.6033	0.37188	-22.4569	-21.1897
AT2G28260	-0.112801	-0.33905	-0.656906	-0.819393	0.287352	-0.256753	-0.192992
AT3G48600	-0.417385	0.213387	-0.052159	0.25078	0.0483371	0.413563	0.0857301
AT3G62050	-0.723926	0.128578	-0.00773825	0.903568	-0.251618	0.46457	0.523372
AT3G02110	-1.23973	-0.338172	-1.02437	-0.957286	0.250158	0.465517	-0.368956
AT3G12020	0.327941	-0.817993	-0.698326	-1.80188	0.849996	-0.17627	-0.133895
AT1G77030	0.315579	-0.594832	-1.00799	-2.09405	0.991356	-0.332217	-0.507861
AT3G61690	0.274315	-0.391358	-0.273007	-1.36894	0.418147	-0.129174	-0.559432
AT5G35750	-0.358761	-0.706541	-0.915638	-1.83858	0.686481	0.129604	-0.445563
AT4G02482	0.361138	-0.177666	-0.806604	-0.968558	0.283259	-0.884484	-0.507634
AT2G34650	-0.173963	-0.151491	0.00832929	0.0371574	-0.0988054	0.0834866	0.0898429
AT3G15750	-0.103628	-0.274653	0.109268	0.264394	-0.000664645	0.212231	0.538383
AT5G16490	-0.270018	0.0779324	-0.0424802	0.447843	-0.384525	-0.156987	-0.014614
AT1G22170	-0.307819	-0.0593457	-0.364166	0.369192	0.0127891	-0.043558	0.441327
AT2G44450	5.32287	3.37021	4.45501	2.56971	-0.0206944	-0.888554	-0.821186
AT1G51520	0.361152	-0.00710943	-0.0448376	-0.667628	-0.0142819	-0.420271	-0.674801
AT5G35935	-1.47998	-5.47625	-0.602395	-1.34838	0.499883	1.37747	4.62775
AT4G00060	0.153349	-0.309022	-0.477934	-1.26729	0.492088	-0.139195	-0.466175
AT1G74890	-2.55085	-0.710833	-1.13136	0.466214	0.112347	1.53184	1.28939
AT3G48640	1.84089	1.96593	1.98239	1.9718	0.584428	0.725925	0.590304
AT1G62914	-0.303042	-0.309001	-0.082948	-0.233679	0.229169	0.449263	0.304491
AT3G27200	0.00434544	0.077281	0.398368	0.816668	-0.620595	-0.226572	0.118792
AT5G14840	-0.20676	0.0855003	0.100079	0.659389	-0.195865	0.110974	0.378024
AT2G03590	0.463146	0.347201	0.583503	0.156218	-0.0579058	0.0624508	-0.248889
AT3G12220	3.11346	3.07267	4.16039	3.58292	-0.363085	0.683841	0.147167
AT3G18240	0.20338	-0.102784	-0.66263	-1.13267	0.495191	-0.37082	-0.534699
AT1G76620	-0.991207	-0.230616	-0.901302	0.390859	-0.0443142	0.0455912	0.577161
AT3G49660	0.32338	-0.0477361	-0.235504	-0.575149	0.332039	-0.226845	-0.195373
AT1G53200	0.177646	-0.633744	-0.333199	-1.40388	0.480774	-0.0300712	-0.289367
AT3G60120	8.01445	8.53081	22.3566	21.4009	-15.272	0.0761335	-1.39591
AT2G18220	0.39752	-0.48386	-0.684495	-1.89816	0.715417	-0.366598	-0.698883
AT3G01960	-0.668689	0.0298981	0.0506956	-0.457045	-0.0744102	0.644974	-0.561353
AT1G01670	0.372116	0.23265	-0.0314371	-0.374573	0.235038	-0.168515	-0.372186
AT5G55250	-1.11052	-0.750875	-0.871944	-0.323404	-0.299584	-0.0610095	0.127887
AT5G61000	-0.686719	-0.245562	-0.493118	-0.26653	-0.220146	-0.0265446	-0.241114
AT1G58210	-0.244938	0.0196943	-0.292699	0.200681	0.375863	0.328102	0.55685
AT1G09060	0.417992	-0.467871	-0.52021	-2.2634	0.81786	-0.120341	-0.977673
AT1G22550	0.933901	0.705372	1.21745	0.269764	-0.866421	-0.582877	-1.30203
AT1G18690	0.292526	0.43184	0.0478695	0.395747	0.184751	-0.0599054	0.148658
AT3G50650	0.600333	0.397495	0.24097	-0.380611	0.464771	0.105408	-0.313335
AT5G61480	0.0347352	-0.518401	-0.0477761	-1.21209	-0.112492	-0.195003	-0.806177
AT4G11000	1.16033	1.37388	0.975858	0.848617	0.502528	0.318058	-0.0227332
AT1G70710	1.27847	0.880087	0.169206	-0.75626	0.214409	-0.894858	-1.42194
AT5G42830	1.69314	1.54965	1.28431	0.737467	1.00623	0.597403	0.194044
AT1G71060	0.107985	0.174078	0.243581	0.73062	-0.0354131	0.100182	0.521129
AT2G35480	-0.482015	-0.405436	-0.540995	-0.265103	-0.131776	-0.190756	0.00855715
AT1G55040	0.245553	-0.0217767	-0.473431	-1.33755	0.534069	-0.184915	-0.7817
AT1G67000	2.97338	1.85948	2.27831	1.09423	0.237648	-0.457425	-0.5276
AT3G20040	0.0529175	0.0197214	-0.500026	-0.813336	0.578629	0.0256855	-0.254428
AT1G16090	0.366623	0.0199231	-0.101177	-0.443808	0.428922	-0.0388781	-0.0348094
AT3G58430	-0.365394	-0.116677	-0.157262	0.257731	-0.134341	0.0737914	0.240068
AT3G16890	0.134687	-0.375808	-0.494446	-0.836876	0.0334318	-0.595701	-0.427637
AT5G09800	0.867939	1.02065	0.0753012	0.329381	0.287257	-0.505381	-0.404016
AT3G12870	0.676299	1.16901	2.06296	2.41375	-1.16295	0.223708	0.081792
AT4G09840	0.234351	0.450774	0.469261	0.365268	0.115353	0.350263	0.0298476
AT3G17340	0.131258	-0.343974	-0.310821	-1.26937	0.500147	0.0580672	-0.425245
AT5G46295	1.52297	1.72294	2.06611	1.85764	0.267313	0.810458	0.402012
AT2G21380	0.0484273	-0.748614	-0.852196	-2.58453	0.806315	-0.0943082	-1.0296
AT5G06230	1.64482	0.234186	0.982107	0.213521	0.156442	-0.506275	0.135778
AT5G51200	-0.181301	-0.492488	-0.886852	-1.57669	0.691978	-0.0135732	-0.392224
AT5G19090	-1.12381	-0.538389	-1.23292	-0.90183	0.437371	0.328257	0.0739307
AT1G19370	0.108023	-0.220441	-0.496774	-0.827458	0.520486	-0.0843112	-0.0865316
AT3G02040	0.722333	0.338639	-0.0872345	-0.616844	0.786742	-0.0228257	-0.168741
AT2G45245	-0.0396021	0.45172	-0.323669	0.418658	0.3257	0.0416323	0.292637
AT4G28280	1.08217	0.565904	0.63623	0.550794	0.751932	0.305995	0.736822
AT1G03470	-0.355741	-0.68058	-0.622181	-0.868051	0.436986	0.170546	0.249515
AT1G07780	-0.56188	-0.236109	-0.284231	0.188301	-0.278818	-0.00116918	0.145591
AT4G04970	0.219557	-0.0400027	-0.380949	-0.929857	0.539252	-0.0612544	-0.350602
AT4G13000	2.00449	1.38997	1.36031	0.779274	0.283689	-0.360492	-0.327002
AT1G04540	0.521249	0.568574	0.0310698	-0.279335	-0.340714	-0.830893	-1.18862
AT2G31340	-0.281147	-0.412821	-0.603094	-1.01491	0.350035	0.0280885	-0.252049
AT1G55325	0.345031	-0.335205	-0.414175	-1.62299	0.664717	-0.0944892	-0.623068
AT3G56730	-0.497691	-0.35208	-0.0548384	0.491475	-0.424931	0.0179217	0.418624
AT1G11710	-0.218979	-0.183891	-0.42235	-0.372391	0.269581	0.0662091	0.0810808
AT5G60408	-0.835788	0.604778	0.597257	-0.783413	-0.0798071	1.35324	-1.468
AT3G04170	22.7645	20.8851	20.9817	19.6644	0	-0.776781	-1.22077
AT5G60910	0.316994	0.38124	0.279088	0.315781	0.14962	0.111714	0.0841605
AT4G13030	0.599542	-0.0411942	-0.221377	-0.661848	0.456112	-0.364807	-0.164542
AT3G06210	0.51238	-0.200794	-0.437255	-1.49622	0.602594	-0.34704	-0.692834
AT1G03905	1.29781	0.366084	0.967862	0.879495	-0.0709861	-0.40093	0.442424
AT1G60545	0.550264	-0.052946	-0.0765789	-0.781013	0.133848	-0.492995	-0.594219
AT1G66730	-0.134596	-0.453518	-0.561767	-1.10307	0.376944	-0.0502264	-0.272609
AT3G07060	-0.0364389	-0.107958	-0.201816	-0.173367	0.174064	0.00868688	0.108655
AT4G24480	0.359199	-0.146773	0.00819299	-1.32673	0.321573	-0.0294321	-0.858386
AT3G19670	0.306831	-0.641058	-0.56104	-1.71067	0.745682	-0.122189	-0.323926
AT1G21160	0.0172678	-0.422062	-0.690201	-1.345	0.771622	0.0641534	-0.151319
AT2G36570	0.13716	-0.162615	0.243585	-0.264736	-0.257891	-0.151467	-0.360012
AT1G49840	-0.622592	-0.40628	-0.570984	-0.372992	0.297672	0.349281	0.33096
AT5G66630	1.50043	0.954325	0.670448	-0.659657	-0.257998	-1.08798	-1.87198
AT1G62830	0.0511645	-0.518383	-0.462094	-1.45388	0.426399	-0.0868594	-0.5091
AT2G40113	4.11461	2.80954	2.3867	2.14294	0.529879	-1.19803	-0.136715
AT2G24690	0.13983	-0.640439	-0.532266	-1.43192	0.606881	-0.0652153	-0.184598
AT3G59765	-0.015645	-0.268937	1.19735	1.4217	-1.07395	0.139043	0.616692
AT4G23040	0.236083	-0.161165	0.111702	-0.605881	0.230936	0.106555	-0.21378
AT1G72855	0.329087	-0.104291	-0.191952	-0.550061	0.0156207	-0.505419	-0.43015
AT2G04270	-0.235543	-0.716093	-0.839926	-1.80306	0.669817	0.0654338	-0.417149
AT1G33720	-0.40795	-0.423975	-0.42171	-0.624338	0.149915	0.136155	-0.0504481
AT4G10310	-0.783843	-0.467011	-0.802809	-0.728686	0.087696	0.0687299	-0.173979
AT3G48580	1.19606	1.10943	0.450572	-0.0709205	0.238209	-0.50728	-0.942141
AT5G13880	0.0566351	-0.147282	0.195624	0.267025	-0.277944	-0.138955	0.136363
AT5G46680	0.27662	0.281746	0.456468	0.561368	-0.0900618	0.0897862	0.18956
AT5G39980	-0.565979	-0.591587	-0.416627	-0.460249	0.0925614	0.241913	0.2239
AT5G53430	0.421771	-0.456738	-0.540142	-1.4706	0.677482	-0.284432	-0.336377
AT2G41150	0.54428	0.221214	-0.12438	-0.161657	0.54988	-0.118781	0.167009
AT3G14330	-0.707266	-0.79896	-1.1743	-1.62782	0.376499	-0.0905304	-0.452365
AT4G04350	-0.233765	-0.693188	-0.81555	-1.38737	0.704742	0.122957	0.0105619
AT1G30220	0.977133	0.225347	1.02459	1.21168	-0.842041	-0.794583	0.144289
AT2G20300	-0.316119	-0.513545	-0.703273	-1.63588	0.33474	-0.0524137	-0.787591
AT4G31400	-0.719048	-0.378512	-0.281199	0.0684516	-0.00919257	0.428656	0.437771
AT4G14510	-0.0184067	-0.656076	-1.02463	-1.77198	0.806566	-0.199661	-0.309334
AT3G11950	0.291814	-0.238929	-0.140901	-0.96159	0.442874	0.0101588	-0.279787
AT4G10550	-0.0266813	-0.20582	-0.624926	-0.897287	0.263559	-0.334686	-0.427909
AT2G22450	0.989147	0.2452	-0.691597	-1.06367	0.620044	-1.0607	-0.688831
AT3G61570	0.414363	-0.644892	-0.314612	-1.31594	0.561795	-0.16718	-0.10925
AT1G03090	0.327916	-0.457103	-0.426286	-1.53273	0.591752	-0.16245	-0.483878
AT3G03350	-0.21124	-0.427059	-0.566655	-1.10204	0.36258	0.00716433	-0.312398
AT4G32450	-0.224932	-0.37836	-0.661262	-0.741125	0.351519	-0.0848112	-0.0112464
AT1G02010	-0.0260318	-0.536576	-0.720968	-1.29695	0.478029	-0.216907	-0.282341
AT5G39500	0.549334	-0.50126	-0.53604	-1.6288	0.72424	-0.361133	-0.403305
AT1G32090	-0.0852005	-0.509015	-0.441358	-0.833173	-0.0234392	-0.379597	-0.347598
AT1G05730	0.382704	0.293497	0.607167	0.634851	-0.201487	0.0229762	0.139867
AT1G62760	0.945457	0.127384	0.100077	0.215504	0.693152	-0.152228	0.781273
AT5G13900	2.69132	1.2555	3.53741	2.29691	-1.7414	-0.895316	-0.699993
AT2G26890	0.414579	-0.316005	-0.453187	-2.1592	0.870088	0.00232102	-0.973112
AT3G60966	3.54903	2.79448	3.80452	3.70347	-0.262137	-0.00665382	0.646857
AT1G65481	3.25949	2.2033	5.12554	4.58285	-1.33966	0.526395	1.03988
AT1G67510	0.190488	0.169724	0.0748688	0.171572	-0.0767241	-0.192343	-0.0748765
AT1G18485	-0.530634	-0.56354	-0.622827	-1.02632	0.536967	0.444774	0.074184
AT1G30550	0.140401	0.223937	0.284905	0.706433	-0.0899634	0.0545406	0.392532
AT1G80450	2.43917	0.953083	2.37205	1.11705	-0.0242888	-0.0914122	0.139679
AT1G80325	-0.366501	-0.0969851	-0.499275	-0.242066	-0.0279057	-0.16068	-0.172987
AT3G56690	0.322727	-0.469459	-0.565685	-1.75477	0.537456	-0.350956	-0.747859
AT1G25320	1.09139	0.651078	0.856992	0.505324	-0.059129	-0.293529	-0.204883
AT2G29490	2.26461	1.59275	1.32132	0.893009	0.39261	-0.550686	-0.307129
AT2G27760	0.0376585	-0.233654	-0.492789	-0.882048	0.46688	-0.0635675	-0.181514
AT1G49320	-0.803349	-0.432565	-0.602674	0.0850079	0.0102535	0.210928	0.527826
AT3G22945	0.338807	-0.571461	0.758338	0.045495	-1.01444	-0.594908	-0.397483
AT5G64030	0.000743486	-0.746136	-0.979607	-1.7362	0.737385	-0.242965	-0.252683
AT1G12080	-2.80191	-1.50589	-2.19779	-0.483867	0.233775	0.837895	1.2558
AT5G10820	0.520113	0.245279	-0.150861	-0.305218	0.338688	-0.332287	-0.211809
AT1G49340	0.16988	-0.268062	-0.535032	-1.84812	0.636706	-0.0682061	-0.943353
AT4G37400	0.149975	-0.319015	-0.179924	-0.321989	-0.194	-0.523898	-0.196974
AT1G80020	0.573458	-0.290484	-0.475273	-2.33184	0.783641	-0.265091	-1.25771
AT2G11140	-0.23876	-0.267419	0.0425003	-0.130709	-0.040266	0.240994	0.0964445
AT1G77145	-0.203372	0.430479	-0.379906	0.245483	0.261402	0.0848679	0.076406
AT5G46330	0.82644	-0.0790452	-0.448591	-1.51606	0.7457	-0.529331	-0.691319
AT3G55910	1.79606	0.103415	0.419436	0.313993	0.221433	-1.15519	0.432012
AT1G77250	-0.0699573	-0.219724	-0.562405	-0.907589	0.508099	0.0156514	-0.179766
AT3G18710	-1.16361	-0.497367	-1.18522	-0.535791	0.0984025	0.07679	0.0599786
AT4G12240	0.104237	-0.0997828	-0.469988	-0.763644	0.790257	0.216032	0.126396
AT5G01595	-0.31811	0.0988956	-0.0146678	0.321978	-0.226441	0.0770014	-0.00335831
AT2G48140	2.92924	2.1434	21.2695	20.2901	-20.309	-0.962718	-1.15633
AT1G79350	0.0784419	-0.147611	-0.67451	-1.22019	0.522111	-0.230841	-0.550465
AT1G05830	0.117718	-0.363105	-0.521089	-1.61109	0.663348	0.0245412	-0.584632
AT1G49720	0.257167	-0.288516	-0.0371151	-0.212552	0.0979925	-0.19629	0.173957
AT1G05320	-0.282908	-0.807784	-0.581157	-1.30978	0.651589	0.35334	0.149597
AT1G74310	0.561829	-0.341207	-0.906431	-2.09957	0.894096	-0.574164	-0.864268
AT1G08290	1.6306	0.776265	1.10546	0.882029	0.10309	-0.42205	0.208854
AT2G31180	4.97218	3.58794	22.3146	20.9599	-18.5918	-0.243436	-0.213869
AT5G58580	-0.176037	0.129539	0.203098	0.688916	-0.184889	0.194246	0.374489
AT5G11310	0.251474	-0.421367	-0.681034	-1.25035	0.350433	-0.582075	-0.478555
AT4G34310	0.499133	-0.0806321	-0.14568	-1.36673	0.52479	-0.120023	-0.761306
AT1G72410	0.067028	-0.505209	-0.75659	-2.07571	0.713909	-0.10971	-0.856595
AT1G12620	-0.198076	-0.268658	-0.336409	-0.492805	-0.00935691	-0.14769	-0.233504
AT4G13970	0.111554	-0.488552	-0.576591	-1.28866	0.555322	-0.132823	-0.244785
AT3G54100	0.891562	0.0118602	-0.0415022	-1.27412	0.724036	-0.209028	-0.561945
AT3G10490	0.303241	-0.164837	-0.478138	-2.04303	0.810019	0.0286403	-1.06817
AT5G44750	0.166216	-0.557071	-0.786733	-1.86462	0.792655	-0.160293	-0.514897
AT3G63510	-0.877418	-0.68123	-0.568051	-0.483027	-0.174582	0.134785	0.0236208
AT3G19370	-0.155723	-0.745447	-0.691933	-1.73857	0.738117	0.201907	-0.255004
AT5G41790	0.128194	-0.290254	-0.552396	-0.654414	0.540164	-0.140426	0.176004
AT5G52630	-0.00184182	-0.11168	-0.243775	-0.320126	0.376897	0.134964	0.168451
AT1G51790	2.86034	1.89914	2.56079	1.11765	0.33455	0.0349996	-0.446944
AT4G33420	0.276898	0.0610274	-0.426123	0.356485	0.486304	-0.216717	0.781762
AT3G43430	0.216675	0.89212	0.697605	1.31427	0.0301941	0.511125	0.452346
AT5G51560	-0.590891	-0.532682	-0.572962	-0.856351	-0.0192332	-0.00130388	-0.342903
AT5G66460	0.853751	-0.202272	-0.250941	-1.27144	-0.00720055	-1.11189	-1.07636
AT3G27520	-0.439231	0.389943	-0.249012	0.5174	0.0617771	0.251996	0.189234
AT4G29850	2.50915	2.0171	2.44254	2.43865	-0.0517156	-0.118329	0.369831
AT1G17750	2.08543	0.923331	1.11734	-0.182478	0.388539	-0.57955	-0.717271
AT3G25710	-0.696525	-0.617157	-0.473525	-0.890704	0.102769	0.325769	-0.170778
ATCG00770	-1.31744	-0.499576	-1.48346	-1.24311	0.448345	0.282319	-0.29519
AT4G17180	-0.482542	-0.226937	-0.751168	-0.396084	0.0416866	-0.22694	-0.12746
AT4G12780	0.239746	-0.243492	-0.536008	-1.68869	0.682484	-0.0932698	-0.76271
AT4G13540	-0.320111	-0.667353	-0.280467	-0.960762	0.544313	0.583956	0.250904
AT3G43610	-0.246527	-0.389564	-0.554401	-1.15168	0.270814	-0.0370607	-0.491301
AT5G44490	-0.93715	-0.455919	-0.818096	-0.110055	0.0287857	0.14784	0.37465
AT1G79220	-0.512596	-0.204476	-0.331873	-0.274337	-0.0742956	0.106427	-0.144157
AT2G28410	-1.53151	-0.585935	-0.704113	-0.39156	0.0159196	0.843319	0.210295
AT3G48850	5.74539	4.9152	5.2758	5.77643	-0.647146	-1.11674	0.214088
AT4G30935	0.834024	-0.378901	-0.524076	-1.98553	0.680025	-0.678075	-0.926609
AT4G30230	1.03313	0.223966	0.234441	0.193741	0.246802	-0.551883	0.216577
AT5G19490	0.11732	0.151613	0.352087	0.202926	0.117493	0.35226	0.168806
AT3G60510	-0.537639	-0.365722	-0.472163	-0.264768	0.127342	0.192818	0.228296
AT3G59250	-1.30594	-0.725077	-1.01809	-0.1855	0.225845	0.513698	0.765422
AT3G44440	0.426566	-1.3603	-0.237328	0.0632224	0.0430268	-0.620868	1.46655
AT3G59410	0.240951	-0.287157	-0.508882	-1.07937	0.493286	-0.256547	-0.298923
AT3G55370	-0.2607	-0.527216	-0.293231	-0.348273	-0.152861	-0.185391	0.0260827
AT3G21600	0.552573	-0.236745	0.0930398	-1.30958	0.000964124	-0.458569	-1.07187
AT2G34357	0.451607	-0.584183	-0.72193	-2.49686	1.02583	-0.147706	-0.886841
ATCG00050	0.103034	-0.639812	-1.02608	0.414398	-0.282941	-1.41206	0.771269
AT3G56970	-1.62077	-0.24876	-1.77807	-1.34975	1.0257	0.868398	-0.0752896
AT4G35640	-0.413752	0.0859385	-0.693862	-0.276047	0.190393	-0.0897176	-0.171592
AT4G38330	-0.317766	0.0547205	-0.57737	-0.0681278	0.187296	-0.0723077	0.0644481
AT2G18969	1.28447	1.51593	-0.0879207	0.60224	0.051366	-1.32103	-0.862325
AT5G54720	-0.238559	0.373433	0.0913062	0.349475	0.41194	0.741806	0.387982
AT3G60610	0.0965152	-0.120573	-0.262056	-0.420951	-0.0276055	-0.386177	-0.327983
AT1G66940	-0.472397	0.175819	-0.849754	-0.45568	0.512059	0.134702	-0.11944
AT1G10330	-0.194356	0.0892187	-0.00607199	0.34669	-0.0709229	0.117361	0.186548
AT2G38380	3.67149	0.504676	6.57758	4.61584	-4.95921	-2.05312	-0.848044
AT4G19440	0.129685	-0.0746724	-0.169194	-0.570583	0.401468	0.102589	-0.094443
AT5G58510	0.599019	-0.246163	-0.28136	-1.58929	0.46383	-0.416549	-0.879298
AT3G06920	-0.15403	-0.334762	-0.341587	-0.966803	0.476035	0.288477	-0.156005
AT3G55340	0.192427	-0.45893	-0.749097	-1.4529	0.614611	-0.326913	-0.379359
AT3G20660	1.37766	0.903738	0.921681	0.333394	0.249206	-0.206772	-0.321138
AT4G23940	-0.381675	-0.685339	-0.915442	-2.28482	0.58857	0.0548024	-1.01091
AT2G33290	0.132191	-0.13441	-0.64819	-1.05813	0.53886	-0.241521	-0.384859
AT3G05730	0.243412	0.204374	0.132562	-0.658347	0.0621176	-0.0487327	-0.800604
AT5G49930	0.325261	-0.502556	-0.495943	-1.53039	0.774391	-0.0468134	-0.253438
AT1G51170	-0.506259	-0.318039	-0.231016	-0.71267	0.0661227	0.341365	-0.328508
AT5G03780	0.214113	-0.32608	-0.68752	-1.03481	0.663166	-0.238467	-0.0455603
AT1G62310	0.496172	-0.330834	-0.456578	-1.41529	0.870288	-0.0824633	-0.214163
AT2G29090	0.407453	-0.389874	0.258814	-0.289388	-0.0986698	-0.247309	0.00181671
AT1G05460	-0.0670629	-0.460909	-0.660812	-1.29584	0.460749	-0.133001	-0.374178
AT2G05995	-1.216	-0.469232	-1.06121	0.0820178	-0.131531	0.0232626	0.419719
AT5G35930	0.0401572	-0.23506	-0.431289	-0.664361	0.331397	-0.14005	-0.0979037
AT2G42200	-1.16563	-0.720744	-0.647525	-0.427008	0.0592977	0.577407	0.353034
AT1G14780	2.00689	0.804711	1.49991	-0.0835914	0.384509	-0.122477	-0.503793
AT5G03545	-1.11894	-0.356129	-1.4704	-0.408342	-0.531206	-0.882661	-0.583419
AT3G53232	2.07224	2.01071	1.33768	1.84406	0.608902	-0.125665	0.442251
AT4G30350	0.423954	-0.569192	-0.449492	-2.03601	0.47479	-0.398656	-0.992026
AT2G34640	-0.133777	-0.790218	-1.0835	-1.88666	0.765326	-0.184392	-0.33112
AT5G12450	1.02238	1.03196	-0.264499	1.01521	0.697863	-0.589014	0.681113
ATCG00750	-0.628706	-1.11367	-0.845922	-0.837975	0.234363	0.0171471	0.510061
AT3G43840	21.689	0	20.996	19.3048	0	0.312976	20.3108
AT1G10060	-0.289139	-0.32027	-0.354805	-0.453575	0.360766	0.2951	0.227461
AT4G03115	-0.116838	0.0509795	-0.354386	-0.269234	0.272697	0.0351492	-0.0475165
AT3G26460	0.796194	0.597199	0.244774	-0.124745	-0.0572076	-0.608628	-0.779152
AT4G21730	0.439219	0.187152	-0.0921897	0.357085	0.252214	-0.279195	0.422147
AT2G30420	-2.0054	-0.764441	-0.968903	-0.249645	0.165241	1.20174	0.680037
AT1G79170	-2.30564	-0.792637	-1.11256	-0.0796747	-0.510788	0.682298	0.202175
AT1G25450	-0.376428	0.602171	-1.06155	-0.679659	0.457348	-0.227772	-0.824482
AT4G23240	0.476036	0.295469	0.022371	-0.159379	0.186163	-0.267503	-0.268685
AT1G29160	1.55933	1.17276	1.939	2.42413	-0.681057	-0.301383	0.570308
AT3G48425	-0.403548	-0.382529	-0.864985	-0.592588	0.287338	-0.174099	0.0772786
AT5G49700	0.67491	0.21519	0.891483	1.60202	-0.177298	0.0392746	1.20953
AT3G53440	0.0929859	-0.362021	-0.363437	-0.893497	0.454527	-0.0018963	-0.0769494
AT5G66620	1.42941	1.01872	1.07732	0.0362631	-0.60593	-0.958022	-1.58839
AT1G67140	0.160945	-0.625112	-0.601902	-1.67339	0.622791	-0.140057	-0.425489
AT3G46370	-0.240749	-0.863374	-0.806025	-1.25026	0.56785	0.00257435	0.180966
AT4G22880	2.00486	1.93782	2.18783	2.93866	-0.797983	-0.615016	0.202865
AT5G59740	0.187953	-0.0647497	0.274694	0.229167	-0.357495	-0.270754	-0.0635777
AT4G26890	0.384835	0.53913	0.668818	0.576288	0.196399	0.480382	0.233557
AT4G04330	-1.39164	-0.536584	-0.380315	0.513419	-0.342005	0.669325	0.707998
AT2G25530	0.0564403	-0.416609	-0.156977	-0.749096	-0.00151068	-0.214928	-0.333997
AT5G18370	0.586246	-0.0903239	-0.068406	-1.3763	0.560736	-0.0939158	-0.72524
AT5G52410	0.880189	-0.339545	-0.051326	-1.78561	0.511684	-0.419831	-0.934377
AT5G07152	-0.140476	-0.0591925	-0.636076	-0.728793	0.321187	-0.174413	-0.348414
AT4G19890	0.15704	-0.0878342	-0.105205	-0.16606	0.165766	-0.09648	0.0875398
AT2G24165	0.251776	0.677466	1.10386	1.51697	-0.544549	0.307533	0.294953
AT1G12460	-0.905659	-0.215162	-0.658341	-0.36097	0.0228076	0.270126	-0.123
AT4G37580	-0.0529595	-0.264877	0.172239	-0.437131	0.109022	0.334221	-0.0632322
AT4G23700	3.43534	2.711	2.71404	2.16168	0.28675	-0.434544	-0.262579
AT5G20450	-0.395713	-0.141272	-0.290181	-0.130548	0.0324784	0.13801	0.0432026
AT1G49160	-0.32126	-0.426647	-0.768045	-0.933661	0.477661	0.0308762	-0.0293529
AT1G22870	0.386604	-0.239978	-0.347814	-2.05163	0.705413	-0.029005	-1.10624
AT5G11040	0.381934	-0.184585	-0.290372	-1.47251	0.410019	-0.262287	-0.877909
AT5G04460	0.298828	-0.408099	-0.50686	-1.38553	0.65322	-0.152468	-0.324207
AT4G30680	-0.77901	-0.272591	-0.650477	-0.355598	0.123394	0.251927	0.0403865
AT3G11590	0.534067	-0.208866	-0.430459	-1.61172	0.821888	-0.142638	-0.580963
AT1G76710	0.424381	-0.469359	-0.446995	-1.16381	0.589051	-0.282325	-0.105398
AT5G01340	0.228464	0.102833	-0.0766793	0.327145	-0.221371	-0.526514	0.00294067
AT1G55915	-0.16705	-0.0618395	-0.341576	0.0299343	-0.0889455	-0.263471	0.00282838
AT1G23410	-0.0210399	0.354652	0.26906	1.30578	-0.743306	-0.453206	0.207823
AT5G41160	2.34234	2.49586	2.8426	2.96996	0.0269763	0.527238	0.501077
AT5G50890	-0.0349727	-0.51768	-0.311243	-0.661905	0.278906	0.00263598	0.134681
AT5G44562	0.351322	0.0373978	-0.122398	0.809718	0.0427265	-0.430993	0.815047
AT5G55480	-0.571738	-0.446016	-0.704689	-0.824474	0.0747052	-0.0582458	-0.303753
AT4G04370	-0.145953	-0.312434	-0.35963	-0.635928	0.254219	0.0405418	-0.069276
AT1G45130	-0.680383	-0.435106	-1.02244	-0.890638	0.382412	0.0403532	-0.0731203
AT1G45110	-0.601163	-0.213387	-0.433458	-0.0514658	-0.149567	0.0181386	0.0123541
AT5G65925	-0.641728	0.469136	-0.729207	0.258468	0.303154	0.215675	0.0924856
AT3G01720	0.768412	0.0370787	0.122746	-1.56249	0.541239	-0.104427	-1.05833
AT3G47010	0.101981	-0.0678876	0.15539	-0.574785	0.433721	0.48713	-0.0731763
AT1G27020	-0.140873	-0.357729	-1.45933	-0.089934	0.927613	-0.390849	1.19541
AT1G79830	0.417555	-0.281594	-0.490743	-2.07987	0.806339	-0.101959	-0.991942
AT3G60040	0.619514	0.245677	0.0395487	-0.346763	0.285766	-0.2942	-0.306675
AT1G60810	-0.476254	-0.424803	-0.525262	-0.286162	-0.114696	-0.163705	0.0239447
AT1G55990	2.98739	0.215477	5.78611	3.45293	-3.61654	-0.817821	-0.379084
AT5G61560	0.370516	-0.724818	-0.306824	-2.30207	0.714324	0.0369837	-0.862926
AT1G29170	0.0902747	-0.795963	-0.730917	-2.09189	0.513986	-0.307206	-0.781943
AT1G49630	-0.336615	-0.54548	-0.920172	-1.5473	0.511727	-0.0718302	-0.490094
AT1G67210	-0.0837262	-0.237057	-0.138721	-0.334845	0.0101167	-0.0448786	-0.087672
AT4G19520	0.861028	-0.148258	-0.104132	-1.2791	0.68954	-0.27562	-0.441304
AT2G35980	5.92274	4.92194	22.2558	21.9524	-17.5579	-0.218852	0.478567
AT5G05790	-0.0609394	-0.0335954	-0.2136	-0.255212	0.275644	0.122983	0.0540274
AT5G39410	0.592079	0.0964958	0.131123	-0.973358	0.411994	-0.0489619	-0.65786
AT4G03430	0.345744	-0.364529	-0.527527	-1.9142	0.651999	-0.221272	-0.897667
AT1G70620	0.411715	-0.496948	-0.699683	-2.5495	0.783122	-0.328276	-1.26943
AT1G24530	0.976124	1.33419	1.0932	0.951015	0.211646	0.328726	-0.171532
AT1G67560	0.609887	-0.215543	-0.154055	-1.82731	0.709156	-0.0547855	-0.902606
AT5G58340	-0.241386	-0.562879	-0.444972	-1.45548	0.419408	0.215822	-0.473194
AT5G06460	0.374408	-0.348489	-0.60178	-1.95835	0.757351	-0.218837	-0.852505
AT4G21100	0.255064	-0.358045	-0.46603	-1.393	0.512156	-0.208938	-0.522803
AT5G60280	0.682041	0.242915	0.322475	-0.279054	0.185129	-0.174436	-0.33684
AT1G20920	-0.0356623	-0.40582	-0.681287	-1.38193	0.687686	0.0420612	-0.288425
AT3G14190	-0.0480541	0.189522	0.291018	1.04921	-0.16068	0.178391	0.699004
AT4G00305	2.68355	1.43066	4.36197	3.80465	-2.14267	-0.464242	0.231326
AT5G06270	-1.30876	0.00690316	-0.933847	0.293756	-0.143633	0.231276	0.14322
AT4G17750	0.378524	-0.218271	-0.219595	-1.24206	0.420993	-0.177126	-0.602799
AT5G54064	-0.173561	0.3095	-0.252623	0.146208	-0.103784	-0.182847	-0.267076
AT1G32860	-0.0697196	-0.205782	0.168954	0.179813	-0.24029	-0.00161697	0.145304
AT3G20898	-0.0328519	0.192385	0.569162	0.755419	-0.248922	0.353092	0.314112
AT4G29140	-0.772745	0.366745	-0.668843	0.281309	-0.10025	0.00365207	-0.185686
AT1G01480	5.29395	4.34155	4.23552	2.75844	0.694418	-0.364012	-0.888688
AT3G47090	1.07815	0.427632	0.656623	0.0055312	0.194269	-0.227261	-0.227831
AT5G52400	23.324	21.7913	22.2821	20.2709	0	-0.0358667	-1.52041
AT5G04480	0.507762	-0.138149	-0.277397	-1.09254	0.682989	-0.10217	-0.271402
AT1G70630	0.514262	-0.120277	0.134943	-0.151666	0.040476	-0.338843	0.00908716
AT1G74330	0.564076	0.0561999	-0.106417	-1.14568	0.456728	-0.213765	-0.745149
AT3G19180	-0.17262	-0.749035	-0.801455	-1.50387	0.322412	-0.306423	-0.432422
AT3G44716	-0.765589	-0.308467	-0.0859908	0.71631	-0.304665	0.374933	0.720111
AT5G62180	-0.387172	0.257105	-0.177945	0.557913	-0.0613335	0.147894	0.239474
AT1G78030	-0.812967	-0.101886	-0.222301	0.53933	-0.256354	0.334312	0.384862
AT1G09820	-0.296076	-0.30517	-0.675997	-0.744635	0.359708	-0.0202122	-0.0797571
AT5G06850	0.317133	-0.590696	-0.698759	-1.92414	0.443327	-0.572565	-0.890121
AT1G26190	0.00797206	-0.456703	-0.603595	-1.27058	0.248199	-0.363369	-0.565682
AT1G48880	-0.280023	-0.0102757	-0.304185	-0.0990502	-0.0711653	-0.0953274	-0.15994
AT3G12690	-0.0609798	-0.184362	-0.451808	-0.412008	0.0285503	-0.362278	-0.199096
AT3G43790	0.383525	0.116594	0.207932	0.104927	-0.123211	-0.298805	-0.134878
AT1G62120	-0.253615	-0.00675011	-0.389404	-0.161479	0.11379	-0.0219982	-0.040939
AT5G59760	1.6511	1.27878	1.79359	2.16356	-0.85331	-0.710818	0.0314703
AT5G46530	-0.151335	0.0113586	0.393353	0.653307	-0.261063	0.283625	0.380886
AT4G15165	0.026912	-0.132008	0.0775479	0.529307	-0.14403	-0.0933942	0.517284
AT2G38465	0.529223	0.580145	-0.38562	0.367427	0.0571007	-0.857742	-0.155617
AT1G01448	0.206285	-0.337235	-0.74174	-1.10237	0.313745	-0.63428	-0.451395
AT2G03140	0.399762	-0.416818	-0.621133	-1.9199	0.884112	-0.136783	-0.618966
AT4G00230	0.0411494	-0.435239	-0.345938	-1.11252	0.200005	-0.187083	-0.477275
AT1G69230	-0.736859	-0.0734562	-0.00636002	0.570342	-0.26019	0.470309	0.383609
AT1G61410	0.0846499	0.0326156	0.388279	0.182302	-0.119409	0.18422	0.0302782
AT1G73960	0.222623	-0.51079	-0.519192	-2.03633	0.723585	-0.0182296	-0.801957
AT1G02420	-0.292336	-0.103376	-0.2109	-0.193422	0.329298	0.410734	0.239252
AT5G15280	-0.000710943	-0.333003	-0.560162	-0.991032	0.632085	0.0726347	-0.0259432
AT5G13887	0.22856	-0.494522	-0.631026	0.387676	1.76708	0.907493	2.64928
AT5G64860	-0.370085	-0.382652	-0.298633	-0.292199	-0.207076	-0.135624	-0.116624
AT3G42052	0.00500748	0.178193	-0.0853442	0.233591	0.0102278	-0.0801239	0.0656256
AT2G32390	0.281165	-0.693626	-0.166443	-0.943558	0.373131	-0.0744767	0.123199
AT4G31050	-0.253243	-0.0585314	-0.308727	0.469544	0.206363	0.150879	0.734438
AT1G62680	-0.366442	-0.239094	-0.366673	-0.415137	0.131229	0.130997	-0.0448138
AT1G10240	0.213029	-0.272205	-0.450389	-1.5158	0.206958	-0.45646	-1.03664
AT2G42650	0.551857	0.181066	-0.11249	-0.524861	0.583833	-0.080514	-0.122095
AT1G20550	-0.222644	-0.258281	-0.110125	-0.328254	0.164546	0.277065	0.0945725
AT1G01680	2.38454	2.31845	2.96179	2.87895	-0.449228	0.128024	0.111272
AT3G21780	1.13809	0.803803	1.33729	0.965981	0.116415	0.315618	0.278593
AT1G76320	0.098655	-0.327997	-0.614414	-1.53286	0.657657	-0.055411	-0.547208
AT1G02700	0.137601	0.250919	-0.881276	-0.286601	0.217809	-0.801068	-0.319711
AT5G23930	-0.374354	-0.0131233	-0.0468061	0.610461	-0.302015	0.0255331	0.321569
AT3G50100	-0.461637	-0.361592	-0.290663	-0.0808148	0.373351	0.544325	0.654128
AT1G51380	-0.37546	-0.613664	-0.71027	-0.490227	0.162876	-0.171934	0.286313
AT5G59990	-0.0757014	-0.358555	-0.696932	0.592739	0.299248	-0.321982	1.25054
AT1G62930	0.0337837	-0.0162519	0.014672	-0.00128451	0.28395	0.264838	0.298917
AT5G66480	0.315499	0.22808	0.0653171	-0.158734	0.0959014	-0.154281	-0.290913
AT1G32100	0.428634	-0.555579	-0.203907	-1.29845	0.201863	-0.430679	-0.541009
AT5G40020	0.568842	-0.211353	0.358647	0.233736	-0.326379	-0.536573	0.11871
AT1G20030	0.815906	0.997655	1.39491	1.2265	-0.451383	0.127625	-0.222536
AT2G06210	0.325576	-0.477423	-0.606863	-1.91795	0.880342	-0.0520968	-0.560189
AT1G69210	-0.270646	0.111945	0.0744015	0.577329	-0.276828	0.06822	0.188556
AT2G18780	0.460045	0.330599	0.0892308	0.192134	0.154521	-0.216294	0.0160555
AT1G55250	0.11739	-0.262294	-0.639772	-1.58196	0.800591	0.0434286	-0.51908
AT4G39270	0.64697	-0.338766	-0.131408	-1.28546	0.407447	-0.370931	-0.539245
AT1G06850	-0.0215732	0.233543	-0.021944	-0.126475	0.0526955	0.0523248	-0.307321
AT4G27480	0.606235	-0.00930474	-0.161233	-0.485717	0.297909	-0.469558	-0.178503
AT3G27580	-0.447235	-0.61128	-0.537494	-0.537386	0.157962	0.067703	0.231856
AT2G21070	0.0679558	-0.222975	-0.514877	-0.960811	0.545959	-0.0368734	-0.191877
AT1G30760	1.98113	0.381522	1.37155	-0.738132	0.333682	-0.275894	-0.785973
AT5G44660	-0.0783792	-0.451027	-0.421197	-1.52649	0.420816	0.0779984	-0.654645
AT5G16730	0.744208	-0.583459	-0.44129	-2.20356	1.12326	-0.0622388	-0.496841
AT1G67720	0.838463	-0.179169	-0.555072	-1.82438	0.646328	-0.747208	-0.998882
AT2G20600	0.699105	-20.0645	-19.7338	-19.7338	-0.330668	-21.7696	0
AT2G07680	-0.155564	-0.795659	-0.736932	-1.57564	0.340928	-0.24044	-0.439052
AT2G40170	5.1813	3.33771	22.1093	21.3386	-17.879	0.0549501	1.12788
AT3G03970	0.0402613	0.0139939	-0.268994	-0.210326	0.312382	0.00312682	0.0880624
AT3G04450	-0.607311	-0.530616	-0.475101	-0.48658	0.00742618	0.139636	0.0514628
AT2G16850	-0.32869	-0.0792011	0.342797	0.85475	-0.543687	0.1278	0.390264
AT2G30362	1.5528	1.7243	1.21352	1.15277	0.558158	0.218875	-0.0133715
AT5G65900	0.0365086	-0.614425	-0.998616	-1.67907	0.700597	-0.334527	-0.364051
AT5G10430	0.0874277	0.470188	0.300759	0.736122	0.0277747	0.241106	0.293708
AT2G45360	2.40132	0.810035	2.73765	1.80494	-0.726897	-0.390574	0.268006
AT5G49470	0.0511577	-0.35792	-0.399441	-1.30741	0.60658	0.155981	-0.342914
AT5G04980	0.0553527	-0.460308	-0.495589	-1.02873	0.14538	-0.405562	-0.423037
AT1G10180	0.307375	-0.461884	-0.702236	-2.01282	0.569744	-0.439867	-0.981195
AT3G11760	0.0744065	-0.224523	-0.345083	-0.792356	0.255032	-0.164458	-0.312801
AT3G19440	-0.187037	-0.003952	-0.371749	-0.368264	0.317796	0.133084	-0.046516
AT1G10340	2.2287	1.54191	2.05471	0.619477	0.463726	0.289736	-0.458708
AT3G62499	-1.07088	-0.667144	-0.63646	0.00799423	-0.163944	0.270474	0.511195
AT1G67420	0.636601	0.15926	0.107068	-0.333077	0.175927	-0.353605	-0.31641
AT1G53035	0.167422	0.392932	0.217348	0.866479	-0.0532726	-0.00334601	0.420274
AT2G42365	-0.0763495	-0.209274	-0.233594	0.319194	-0.380203	-0.537448	0.148264
AT4G38050	0.328497	0.258728	0.0850598	0.0219731	0.148748	-0.0946892	-0.0880069
AT5G01400	0.305709	-0.45791	-0.544491	-1.47623	0.651342	-0.198857	-0.366981
AT1G07130	-0.0877138	0.00183295	0.179572	0.315167	-0.412261	-0.144975	-0.0989273
AT5G62480	2.88213	1.7058	2.40264	1.65691	0.332091	-0.147403	0.283202
AT2G36910	0.261827	-0.480885	-0.610855	-2.35461	0.809941	-0.0627406	-1.06378
AT5G14360	-0.0555062	-0.209106	0.921424	0.84885	0.637131	1.61406	1.69509
AT4G17215	1.7571	1.22808	1.69559	1.64914	-0.493887	-0.555389	-0.0728279
AT2G29065	0.474768	-0.107663	-0.232871	-0.595003	0.50992	-0.197719	0.0225805
AT3G02820	-0.922146	-0.179451	-0.415427	0.44909	-0.315043	0.191675	0.313498
AT3G60740	0.035686	-0.472848	-0.339747	-1.53975	0.301105	-0.0743285	-0.765793
AT1G16445	-0.940609	0.0180715	-0.537623	0.537427	-0.0814366	0.32155	0.437919
AT2G42960	1.02098	0.275626	0.566566	-0.462841	0.339444	-0.114966	-0.399023
AT3G52390	-0.224865	-0.010734	-0.165285	0.114915	-0.22113	-0.161549	-0.0954807
AT1G05120	0.563244	-0.109463	-0.289469	-1.43831	0.565761	-0.286952	-0.763087
AT5G04250	1.03773	1.23047	0.830573	0.754245	0.280802	0.0736458	-0.19542
AT2G24530	0.240049	-0.153204	-0.2631	-0.773212	0.48219	-0.020959	-0.137819
AT2G28053	0.618862	0.0967716	-1.01079	-0.166243	0.729182	-0.900466	0.466167
AT5G48670	0.316894	0.461328	0.147478	0.507079	0.18187	0.0124528	0.22762
AT3G50700	0.430276	0.283944	0.21187	0.389486	0.453002	0.234595	0.558544
AT4G21170	0.0101283	0.0716128	0.0938789	0.275074	0.216575	0.300326	0.420036
AT1G27660	-0.272717	-0.248459	-0.152673	0.0295906	-0.216724	-0.0966794	0.0613258
AT5G58550	-0.17589	-0.338521	-0.586488	-0.855691	0.297727	-0.112871	-0.219444
AT5G48560	1.29192	0.485073	0.818982	0.251717	0.181327	-0.291611	-0.0520297
AT5G25590	-0.674424	-0.611856	-0.765764	-1.48173	0.263976	0.172636	-0.605893
AT2G37025	2.0201	1.5789	1.12927	0.897939	0.785804	-0.105026	0.104839
AT3G02980	0.137034	0.466024	0.0633779	0.493998	-0.193324	-0.26698	-0.165351
AT1G26260	0.557847	0.245078	0.388649	-0.0139012	0.19567	0.0264717	-0.0633087
AT3G07280	0.330065	-0.202849	-0.439727	-1.05015	0.668733	-0.101059	-0.178568
AT5G14770	-0.0194115	-0.321359	-0.66702	-1.21072	0.613189	-0.0344194	-0.276167
AT5G01542	1.64798	0.58591	0.48471	-1.48416	0.488019	-0.675252	-1.58206
AT5G22220	0.0856537	-0.331937	-0.121203	-0.948102	0.34158	0.134723	-0.274585
AT5G56730	0.196386	-0.432238	-0.365014	-1.36656	0.464356	-0.0970436	-0.46997
AT5G53010	0.583928	-0.0898323	-0.499409	-1.25057	0.685958	-0.39738	-0.474776
AT3G48210	-0.299976	-0.432331	0.0427516	0.414016	-0.5015	-0.158773	0.344847
AT2G02770	-0.0495601	0.0444258	-0.193239	0.00661291	0.165431	0.0217518	0.127618
AT1G51940	0.43379	0.379871	-0.561912	0.0882634	0.459109	-0.536593	0.167501
AT4G24970	1.20268	0.810947	1.27121	0.325826	0.256334	0.324864	-0.228787
AT2G32900	0.438114	-0.0926686	-0.33162	-1.24525	0.593516	-0.176218	-0.559064
AT5G38880	-0.000223141	-0.495931	-0.604809	-1.68095	0.67475	0.0701645	-0.510267
AT4G24110	4.73645	4.8343	5.15755	3.94313	-1.04634	-0.625242	-1.93751
AT1G24270	-0.280407	-0.088726	-0.649958	0.478286	0.0593646	-0.310186	0.626377
AT4G24175	-0.512658	0.0313228	-0.0677887	0.473002	-0.206057	0.238812	0.235622
AT1G78960	0.191473	-0.320054	-0.422399	-0.87708	0.300129	-0.313742	-0.256897
AT1G80700	-0.0130476	-0.0315838	-0.06347	-0.0954141	0.232765	0.182343	0.168935
AT1G22830	-0.0432613	-0.130386	-0.316752	-0.243134	0.149032	-0.124458	0.0362844
AT5G22380	3.09435	3.16228	3.19527	3.48941	-0.33857	-0.237651	-0.0114424
AT2G40530	-1.07911	-0.359732	-0.729446	-0.0393541	0.292007	0.641672	0.612384
AT1G75730	0.179189	-0.50349	-0.218815	-0.334779	0.0522793	-0.345724	0.22099
AT5G49010	-0.516942	0.0586846	-0.0727489	-0.0647139	-0.111248	0.332946	-0.234646
AT1G03410	0.308437	0.00754302	-0.104329	-1.22708	0.0276036	-0.385163	-1.20702
AT4G01460	-1.3566	-0.735775	-0.753436	-0.00959856	0.121182	0.724346	0.847359
AT3G56900	-0.357646	-0.325865	-0.601337	-0.690933	0.264611	0.0209197	-0.100457
AT4G04790	-0.173949	-0.546147	-0.114407	-0.445245	0.402673	0.462216	0.503576
AT5G47250	0.14339	0.0683334	-0.145447	-0.629667	0.300803	0.0119666	-0.397197
AT5G46090	-0.159968	-0.328225	0.0730254	-0.110394	0.244224	0.477217	0.462055
AT4G31354	1.5039	-0.0677788	-2.58394	-0.975719	1.27028	-2.81755	0.362342
AT5G13270	-0.0986141	-0.416853	-0.221986	-0.751519	0.160875	0.0375031	-0.173791
AT4G36580	-0.270263	-0.485704	-0.495482	-1.16547	0.391852	0.166633	-0.287914
AT2G28570	0.111227	0.558477	-0.18777	0.897061	0.195805	-0.103191	0.53439
AT5G67410	0.663266	0.805078	0.483844	0.544844	0.46312	0.283698	0.202886
AT2G40930	0.285333	-0.395522	-0.486915	-1.98322	0.606067	-0.166181	-0.981635
AT5G19470	-0.519906	0.44444	0.420271	-0.681318	-0.398375	0.541802	-1.52413
AT1G56060	3.09638	3.93462	3.18555	4.2068	-0.0707232	0.0184473	0.201457
AT2G20960	0.398216	-0.149314	-0.130759	-2.26174	0.855995	0.32702	-1.25644
AT5G04840	0.405668	-0.0290284	0.18868	-0.0479627	-0.222099	-0.439087	-0.241033
AT4G20340	0.183248	-0.298442	-0.834966	-1.70273	0.701664	-0.31655	-0.702622
AT3G05850	0.392062	-0.242908	-0.5109	-1.644	0.615041	-0.287921	-0.786051
AT1G28050	1.1149	0.249953	0.214949	-0.482245	0.532846	-0.367107	-0.199352
AT5G38565	0.232378	-0.0155127	0.289021	0.740896	-0.183239	-0.126597	0.573169
AT4G30000	0.0671421	-0.30471	-0.713232	-1.32295	0.527006	-0.253368	-0.491232
AT3G02800	0.285541	0.215527	0.824696	0.714603	0.0156101	0.554766	0.514687
AT5G28450	-0.175081	0.336431	-0.347584	0.00767626	0.1019	-0.0706031	-0.226854
AT2G41730	-0.213911	0.834342	0.485444	1.36253	-0.641078	0.0582767	-0.112886
AT1G61310	0.0709837	-0.0949497	-0.250486	-0.519639	0.404163	0.0826929	-0.0205261
AT3G51760	0.0839766	0.0673302	0.353072	0.418619	-0.0919064	0.177189	0.259382
AT1G24330	1.01485	0.024117	0.00932524	-1.14263	0.174606	-0.830923	-0.99214
AT1G61030	0.292546	-0.295828	-0.457494	-1.85036	0.662102	-0.0879376	-0.89243
AT1G01930	0.472233	-0.459407	-0.624416	-2.17584	0.653446	-0.443203	-1.06299
AT5G43810	-0.337393	-0.711151	-0.498219	-1.89067	0.481556	0.32073	-0.697963
AT3G49600	-0.0562369	-0.522362	-0.641719	-1.61147	0.614565	0.0290824	-0.474543
AT2G01130	0.503628	-0.190595	-0.127512	-1.18339	0.466741	-0.164398	-0.526052
AT1G46264	-0.2165	0.237274	0.115046	0.611005	-0.28621	0.045336	0.0875214
AT1G04295	0.0580136	0.963348	-0.7917	0.762386	0.23957	-0.610144	0.0386079
AT1G06910	-0.130281	-0.529554	-0.436013	-0.570896	0.478461	0.172729	0.437119
AT5G09420	0.359695	0.214739	0.210287	-0.235583	0.28275	0.133342	-0.167572
AT1G79710	0.32942	0.132758	-0.311687	-0.171973	0.37434	-0.266767	0.0696077
AT4G28650	0.342523	-0.14408	-0.190156	-1.4979	0.383294	-0.149385	-0.970523
AT2G28080	0.0495919	0.201564	-0.304627	0.0759769	0.409489	0.0552707	0.283902
AT5G25475	-0.631753	-0.160668	-0.642269	-0.61537	0.0635039	0.0529878	-0.391198
AT5G26680	-0.0686372	0.00513218	-0.165584	-0.761278	0.231402	0.134455	-0.535008
AT3G55840	1.65453	1.69732	1.6446	1.13644	0.428022	0.418093	-0.132859
AT1G09421	1.81982	1.50502	1.06136	0.791309	0.174656	-0.583803	-0.539053
AT1G48120	0.122168	-0.414243	-0.652211	-1.78202	0.584467	-0.189912	-0.783311
AT3G54010	0.803786	-0.107863	-0.340591	-1.40195	0.782706	-0.36167	-0.511377
AT1G14630	0.37887	0.379509	0.187867	0.023491	-0.0898056	-0.280809	-0.445823
AT2G42900	-1.54526	-0.786754	-1.25572	-0.837861	0.490392	0.779934	0.439286
AT3G54910	-0.768364	-0.402178	-0.717146	0.0012839	-0.0171964	0.0340222	0.386266
AT5G38212	0.208313	-0.636155	-0.135207	-1.19827	0.315653	-0.027867	-0.246461
AT5G58130	0.460111	-0.298749	-0.593978	-2.51895	0.807129	-0.246959	-1.41307
AT2G21630	0.281022	0.159291	0.190181	-0.277103	0.124641	0.0337997	-0.311754
AT5G45060	0.271772	-0.291575	-0.282787	-1.63955	0.700175	0.145615	-0.647797
AT1G13980	0.439827	-0.2982	-0.579655	-2.17117	0.838377	-0.181105	-1.03459
AT3G27670	0.313816	-0.353621	-0.486217	-1.73032	0.780851	-0.0191828	-0.595848
AT3G57680	1.04412	-0.363851	-0.385945	-0.58799	0.853728	-0.576333	0.629589
AT1G29750	0.281979	-0.528577	-0.682565	-1.88671	0.646383	-0.31816	-0.711751
AT1G78820	-1.06793	-0.799354	-0.549164	-1.39724	0.207525	0.726293	-0.390363
AT2G04032	-0.166661	0.219999	0.118045	0.426336	0.229247	0.513952	0.435584
AT3G08943	0.0723673	-0.261442	-0.484335	-1.54969	0.439078	-0.117624	-0.849171
AT3G19570	-0.388995	-0.245895	-0.204422	-0.556903	0.0176664	0.20224	-0.293342
AT2G38970	0.403877	0.116451	0.158143	-0.830736	0.169561	-0.076173	-0.777626
AT5G55760	-0.249557	-0.175737	-0.0559171	-0.306296	0.083271	0.276911	-0.0472871
AT3G52100	0.436355	0.0902297	-0.104084	-0.687919	0.532825	-0.00761376	-0.245324
AT3G23230	-0.0460872	0.385591	-0.727691	0.489202	-0.0219692	-0.703572	0.0816422
AT4G23990	-0.671038	-0.956174	-0.744466	-0.882243	-0.109401	-0.18283	-0.0354701
AT5G57830	0.0984554	0.141915	0.391365	0.175669	0.0688143	0.361724	0.102569
AT1G50700	0.326139	-0.0263147	-0.389462	-0.806004	0.486918	-0.228682	-0.292771
AT4G11440	0.168734	-0.150552	-0.298401	-0.984818	0.20289	-0.264245	-0.631376
AT4G10380	0.558897	0.50131	-0.961449	0.269777	0.609327	-0.911019	0.377793
AT4G38420	0.146987	-0.196045	-0.0296893	-0.827713	0.380143	0.203467	-0.251525
AT5G51660	0.00620056	-0.363631	-0.61112	-1.74296	0.622124	0.00480358	-0.757209
AT3G07520	1.02519	0.377377	0.386994	-0.597691	0.442353	-0.19584	-0.532715
AT3G09360	0.632082	-0.1001	-0.353765	-1.35331	0.523754	-0.462093	-0.729459
AT5G02420	0.905291	0.411675	0.166346	0.416429	0.378736	-0.360209	0.38349
AT3G61360	-0.220289	-0.165339	-0.217993	-0.0589894	-0.116087	-0.113791	-0.00973766
AT2G39260	0.663429	-0.344435	-0.317256	-1.48063	0.805733	-0.174951	-0.33046
AT3G59320	0.173155	-0.0446014	-0.463242	-0.238838	0.354852	-0.281545	0.160615
AT3G12530	-0.43175	-0.0816111	-0.063231	-0.0404585	-0.231229	0.13729	-0.190076
AT2G12190	0.0692711	0.124781	0.10287	0.41968	-0.456613	-0.423015	-0.161714
AT3G10110	0.0389567	0.554991	0.156353	0.751382	-0.0562218	0.0611741	0.140169
AT1G54540	2.93588	0.542567	5.0242	2.90906	-2.8636	-0.775273	-0.49711
AT5G37340	-0.165303	-0.361624	-0.449235	-0.724776	0.0746634	-0.209268	-0.288489
AT3G55515	2.09391	2.29851	1.33742	1.28628	0.672117	-0.0843738	-0.340115
AT1G14170	0.95816	0.60422	0.807121	0.496507	0.170779	0.0197398	0.0630652
AT1G19290	0.0881229	-0.212697	-0.478378	-1.22457	0.428766	-0.137735	-0.583102
AT5G64220	0.521521	-0.30059	-0.336357	-1.54315	0.713924	-0.143954	-0.528636
AT5G18980	0.385694	-0.301722	-0.368373	-1.89569	0.615251	-0.138816	-0.978722
AT3G15150	-0.777865	-0.370872	-0.566843	-0.00581776	0.0128021	0.223824	0.377856
AT4G16144	0.940593	0.341278	-0.0756558	-1.04135	0.815283	-0.200966	-0.567341
AT5G67450	1.70056	1.17149	1.69359	0.919205	0.266865	0.259898	0.0145787
ATMG01170	-0.619458	-0.113792	-0.238632	0.58044	-0.170539	0.210286	0.523692
AT1G23460	0.422646	-0.378797	0.432418	-0.714128	-0.0962709	-0.0864986	-0.431602
AT4G03540	2.55895	0.611074	4.03747	2.85344	-2.0593	-0.580786	0.183059
AT1G80190	0.00419054	-0.0352835	-0.238172	-0.273811	0.244309	0.00194697	0.00578208
AT1G05210	0.0928212	0.86745	0.185835	1.41985	-0.130517	-0.0375035	0.42188
AT2G24650	0.250508	-0.454493	-0.478012	-1.25072	0.779399	0.0508788	-0.0168309
AT2G01330	0.101141	-0.066385	-0.321149	-0.745859	0.221193	-0.201098	-0.458282
AT1G64790	-0.0375222	-0.608458	-0.715936	-1.77953	0.729008	0.0505936	-0.442061
AT4G35940	0.70336	-0.468282	0.0579491	-1.66507	0.458754	-0.186656	-0.738033
AT1G25430	-0.270439	-0.57553	-0.542394	-1.31539	0.253981	-0.0179738	-0.485881
AT1G15165	-0.124207	-0.291241	-0.753658	-1.03022	0.143933	-0.485519	-0.595046
AT4G00590	0.249891	0.114265	-0.28591	-0.613151	0.428352	-0.107449	-0.299064
AT4G23450	0.776027	0.809204	0.84953	0.717348	0.34418	0.417683	0.252324
AT2G22260	-0.533841	-0.138947	-0.544415	-0.0108993	-0.07225	-0.0828235	0.0557973
AT2G22390	-0.236912	-0.158294	-0.104141	0.227202	0.0202688	0.153039	0.405765
AT5G58040	0.193626	0.0744768	-0.428825	-0.732873	0.816777	0.194326	0.00942762
AT3G21010	0.212724	0.353636	-0.252698	-0.171109	0.232426	-0.232996	-0.292318
AT5G40570	-0.368452	-0.184521	0.0445233	0.674091	-0.530548	-0.117573	0.328065
AT2G17280	-0.396633	-0.445099	0.284465	0.801319	-0.193381	0.487718	1.05304
AT2G22840	0.178817	0.25317	0.510884	0.372314	0.0423822	0.374449	0.161526
AT1G69070	0.296905	-0.285935	-0.520375	-1.69476	0.69479	-0.12249	-0.714032
AT4G30790	0.158799	-0.583747	-0.455447	-1.91019	0.661902	0.0476558	-0.664539
AT1G05760	0.579824	0.63426	0.328055	0.75397	0.458988	0.20722	0.578699
AT1G18840	-0.548357	-0.896404	-0.748568	-1.55464	0.31694	0.116729	-0.341296
AT1G67810	0.775947	1.24191	1.1916	1.57593	-0.0335601	0.38209	0.300457
AT3G11150	3.73252	2.72218	2.58007	2.37458	-0.228604	-1.38105	-0.576208
AT1G80060	-0.589617	-0.182044	-0.480047	-0.259098	0.132171	0.241741	0.0551174
AT1G52520	0.277249	-0.435201	-0.39384	-1.23281	0.525411	-0.145678	-0.272193
AT3G51650	0.314311	-0.156346	-0.350124	-1.22263	0.386683	-0.277751	-0.679596
AT3G24560	-0.513788	-0.543491	-0.556233	-0.935228	0.325571	0.283126	-0.0661659
AT5G06000	0.278284	0.243616	0.0455242	-0.114286	0.105424	-0.127336	-0.252478
AT5G05660	0.0823425	-0.236574	-0.454168	-1.58159	0.559841	0.0233307	-0.78517
AT5G05630	-0.278989	0.168023	-0.111564	0.476111	-0.215803	-0.0483779	0.092285
AT1G77660	0.120225	0.236223	0.267506	0.339534	-0.0282479	0.119033	0.0750635
AT1G62670	0.00690128	-0.0231782	-0.340725	-0.538267	0.237294	-0.110332	-0.277795
AT3G16840	0.449434	-0.310221	-0.605289	-1.65405	0.811158	-0.243565	-0.53267
AT3G62040	-1.51823	-0.812625	-1.44123	-0.526297	0.0447328	0.121729	0.33106
AT1G31150	-0.266607	-0.68187	-0.639822	-1.46252	0.376521	0.00330592	-0.404129
AT4G33240	0.402524	-0.363263	-0.529878	-2.25024	0.80102	-0.131382	-1.08596
AT1G75360	-0.749028	-0.292995	-0.487694	0.326433	-0.0116057	0.249728	0.607822
AT1G01010	1.16554	0.592933	0.574754	-0.334299	0.504221	-0.0865672	-0.423012
AT5G46500	0.946909	0.561249	0.224525	-0.122628	0.747963	0.025579	0.0640865
AT1G20960	0.158369	-0.552041	-0.946762	-2.33726	1.02123	-0.0838974	-0.763988
AT3G17450	0.239278	-0.459211	-0.510894	-2.28607	0.434823	-0.315349	-1.39204
AT1G46480	0.743986	0.455873	0.337359	0.270657	-0.360587	-0.767213	-0.545803
AT1G62990	1.29035	0.58695	1.1055	0.0708931	0.171889	-0.0129696	-0.344169
AT5G47810	-0.0136199	0.339022	-0.265501	-0.131398	0.279495	0.0276134	-0.190926
AT2G37430	3.41739	2.30629	4.45335	3.60816	-0.42309	0.612862	0.878773
AT5G40600	-0.205526	-0.131695	-0.178661	0.166842	0.0790119	0.105877	0.377549
AT3G53510	0.222644	-0.109792	0.0645531	-0.744079	0.147773	-0.0103178	-0.486514
AT1G11060	0.260589	-0.339687	-0.188208	-1.06765	0.336192	-0.112606	-0.391776
AT4G31270	0.0881405	-0.212444	-0.221109	-0.852001	0.561737	0.252487	-0.0778207
AT1G05300	0.530413	0.0906537	0.931797	0.0856025	-0.380807	0.0205767	-0.385858
AT4G01860	0.129093	-0.362117	-0.724996	-1.4916	0.605517	-0.248573	-0.52397
AT1G10586	23.6229	21.649	18.2036	19.1013	0	-4.41339	-2.5477
AT2G32830	1.58879	0.922977	1.51472	1.4934	-0.699365	-0.773432	-0.12894
ATMG00060	-0.130327	-0.105592	-0.0950136	0.138368	-0.185279	-0.149965	0.0586816
AT2G46560	0.310413	-0.2671	-0.559578	-1.30506	0.670787	-0.199204	-0.367172
AT5G04620	-0.268634	-0.215455	-0.597847	-0.173039	-0.0261863	-0.3554	0.0162296
AT3G48058	2.51086	1.2653	-2.42135	0.424939	3.40517	-1.52704	2.56481
AT5G50990	-0.0857533	-0.301063	-0.0659408	-0.267525	0.221005	0.240817	0.254543
AT4G04180	0.402064	-0.374094	0.0545602	-0.936167	0.319486	-0.0280183	-0.242588
AT3G59530	0.355628	0.0107563	-0.419376	-0.435236	0.358911	-0.416093	-0.0870814
AT3G01160	0.800667	-0.4435	-0.666674	-2.02301	0.915665	-0.551675	-0.663844
AT1G17230	0.510637	-0.600054	-0.19156	-1.24899	0.123865	-0.578332	-0.525076
AT4G04220	0.486772	0.12147	0.129575	-0.554338	0.19015	-0.167046	-0.485658
AT1G18900	0.433143	-0.314788	-0.431203	-2.22337	0.678983	-0.185363	-1.2296
AT2G28315	0.32047	0.189355	0.665696	-0.177801	-0.198678	0.146548	-0.565833
AT5G62940	0.48985	-0.0800301	0.476652	-0.049474	-0.269531	-0.282729	-0.238975
AT3G30214	0.981501	0.84829	0.936184	1.69382	-0.485151	-0.530467	0.360381
AT2G36050	-0.139017	0.628913	0.221041	0.667882	0.62435	0.984408	0.663319
AT5G20170	0.495884	-0.329395	-0.304608	-1.06596	0.386496	-0.413995	-0.350066
AT1G79540	0.146909	-0.0879532	-0.149798	-0.619537	0.181403	-0.115304	-0.350181
AT5G02820	-0.0746139	0.0563142	-0.184591	-0.631226	0.265681	0.155704	-0.421859
AT3G57780	-0.00274729	-0.460461	-0.572987	-1.3121	0.368438	-0.201801	-0.483198
AT3G23900	0.246757	-0.417593	-0.536245	-1.99935	0.699612	-0.0833896	-0.882144
AT5G61390	0.337578	-0.269925	-0.00587675	-0.701785	0.197522	-0.145933	-0.234338
AT5G13530	0.564943	0.131575	-0.324315	-0.987193	0.80448	-0.0847778	-0.314288
AT4G39160	0.310423	-0.500751	-0.620847	-1.68577	0.785186	-0.146084	-0.399836
AT4G25434	-0.0544466	-0.283293	-0.106738	0.176819	-0.2025	-0.254792	0.257612
AT2G44790	3.67636	2.69539	2.25474	2.17538	0.997071	-0.424547	0.477066
AT2G14680	0.576013	-0.36549	-0.502538	-1.48149	0.712042	-0.366509	-0.403957
AT5G43560	0.479991	-0.455554	-0.450145	-2.17598	0.866394	-0.0637427	-0.854029
AT1G25211	0.456622	0.321016	-0.122935	-0.18508	0.1405	-0.439057	-0.365596
AT1G12430	0.169694	-0.374537	-0.417895	-1.4572	0.457684	-0.129904	-0.624978
AT5G04200	0.0157434	-0.690216	-0.605984	-0.841105	0.117902	-0.503825	-0.0329872
AT4G31240	0.653355	0.507705	0.36737	0.510473	0.248266	-0.0377195	0.251035
AT1G32190	0.164751	0.564662	0.0994617	0.801026	-0.0788729	-0.144163	0.15749
AT1G51965	-0.115974	-0.258921	-0.406681	-0.909101	0.279582	-0.0111255	-0.370598
AT3G06340	0.237326	-0.577515	-0.541725	-1.78336	0.597131	-0.18192	-0.608713
AT5G02080	-0.132618	-0.0198592	-0.271931	0.634337	0.039415	-0.0998971	0.693611
AT4G15710	-0.614653	-0.563938	-0.264817	0.305287	-0.531201	-0.181365	0.338024
AT1G01380	-0.328049	0.116458	0.658271	1.10245	-0.516048	0.470272	0.469945
AT2G25660	0.162284	-0.490931	-0.726717	-1.69887	0.7939	-0.0951019	-0.414038
AT3G51720	-0.0145369	-0.269154	-0.0280571	-0.551379	-0.0087904	-0.0223105	-0.291015
AT2G35170	-0.256043	-0.255625	-0.542817	-0.723622	0.309997	0.0232229	-0.158
AT5G52740	0.116822	1.25088	0.609729	1.276	0.265837	0.758744	0.290954
AT4G29540	-0.0787652	0.0725571	-0.15665	-0.229336	0.0405382	-0.037347	-0.261355
AT3G49920	-0.195455	-0.212533	0.449893	0.641907	-0.730762	-0.0854148	0.123678
AT5G58960	-0.53896	-0.86417	-0.803209	-2.19624	0.407815	0.143566	-0.924259
AT4G02020	0.660827	-0.764235	-0.780897	-1.76226	0.886702	-0.555023	-0.11132
AT3G06250	0.081854	-0.342823	-0.463516	-1.4794	0.337073	-0.208298	-0.799503
AT3G58975	-0.681428	-0.226316	-0.472153	0.0874861	0.0233199	0.232595	0.337122
AT1G16530	-0.0115548	-0.024195	-0.391755	0.103296	0.0977331	-0.282467	0.225224
AT5G37660	0.00812674	0.0746012	0.0800233	0.442442	-0.31325	-0.241354	0.0545899
AT3G24810	-0.0525474	-0.0381885	0.0681917	0.247166	-0.263519	-0.142779	0.0218363
AT4G40070	0.00826163	0.123883	-0.356054	0.339756	-0.257126	-0.621442	-0.0412536
AT4G20060	0.0130787	-0.165993	-0.264312	-0.43924	0.264091	-0.0132994	-0.00915562
ATMG01360	0.0793609	-0.109942	-0.611513	-0.436306	0.467475	-0.2234	0.141112
ATMG01120	1.10252	-1.29673	0.906714	1.46621	-0.507058	-0.70286	2.25588
AT1G77880	-0.554543	0.189518	-0.357356	0.252071	-0.161565	0.0356223	-0.0990119
AT4G30410	-0.564581	-0.173027	-0.894535	-0.356691	0.393308	0.0633549	0.209644
AT4G04920	0.888826	-0.0286927	-0.179256	-1.06819	0.657322	-0.41076	-0.382172
AT2G01740	-0.267077	-0.120038	-0.326857	-0.0536262	0.145514	0.0857341	0.211926
AT3G46150	-0.0614005	0.434554	0.256326	0.879415	-0.209931	0.107796	0.234931
AT1G01640	0.628883	0.145901	-0.136155	0.254922	0.140965	-0.624073	0.249986
AT4G12670	0.251411	-0.289376	-0.649106	-1.20842	0.791782	-0.108735	-0.12726
AT4G32670	-0.0914729	-0.301881	-0.473166	-1.41358	0.329308	-0.0523853	-0.78239
AT4G33440	0.0534852	0.385474	-0.143925	0.441699	0.0174987	-0.179912	0.0737242
AT5G39900	-0.035958	-0.351024	-0.264468	-0.854315	0.156703	-0.0718068	-0.346588
AT1G19540	1.55221	0.313009	1.51234	0.6012	-0.43937	-0.479246	-0.151178
AT5G16820	0.918141	-0.258915	-0.0835793	-1.16023	0.637733	-0.363987	-0.263584
AT1G21630	0.324045	-0.172722	-0.474908	-2.43843	0.806732	0.00777924	-1.45897
AT4G09020	0.833672	-0.0595993	0.177462	-0.573537	0.342095	-0.314114	-0.171842
AT3G28260	23.0292	0	0	0	0	-23.0292	0
AT1G76760	0.455848	0.338574	0.308917	1.40804	-0.340529	-0.48746	0.728939
AT1G19100	-0.111645	-0.133349	-0.318467	-0.42445	0.207832	0.0010099	-0.0832686
AT2G31600	-0.00173848	-0.204981	-0.345588	-0.704751	0.0611182	-0.282731	-0.438652
AT1G63130	-0.424661	-0.14543	-0.228085	-0.0460827	0.170926	0.367501	0.270273
AT2G36740	0.282668	-0.621373	-0.665785	-1.33875	0.769816	-0.178637	0.0524407
AT2G12462	-0.146952	-0.296341	-0.237475	-0.811878	-0.0894261	-0.179949	-0.604963
AT4G09012	0.221762	0.379003	0.00843703	1.078	0.0467092	-0.166615	0.74571
AT4G20740	-0.399695	-0.268668	-0.705807	-0.527589	0.190205	-0.115907	-0.0687166
AT1G45332	0.450124	-0.114675	-0.589435	-1.73206	0.887327	-0.152233	-0.730059
AT1G32240	-0.266188	-0.650791	-0.399987	-1.43504	0.194981	0.0611824	-0.589265
AT5G24710	0.114122	-0.511071	-0.673215	-2.25758	0.651066	-0.136271	-1.09544
AT3G55890	2.09346	1.49399	1.66504	1.641	0.202481	-0.225937	0.349495
AT1G32610	-0.233882	-0.0866883	0.45148	0.452557	-0.305407	0.379955	0.233839
AT5G64950	-0.0078424	0.294657	-0.165429	0.564942	0.120704	-0.0368826	0.390989
AT1G56020	0.107202	0.155841	0.348764	0.161941	-0.319815	-0.0782539	-0.313716
AT4G03140	-0.0304518	-0.459612	0.00471396	-0.390208	0.212735	0.247901	0.282139
AT1G01570	1.23826	0.473901	1.03791	0.477439	-0.477111	-0.67746	-0.473574
AT1G71990	-0.525646	-0.114506	-0.590164	-0.4393	0.154788	0.0902695	-0.170006
AT4G19810	4.76685	3.24506	7.11417	6.02028	-2.50137	-0.154045	0.273859
AT5G57840	0.21127	-0.331727	-0.311538	-0.626638	-0.02715	-0.549958	-0.322061
AT3G23109	-0.160027	-0.143649	-0.146611	-0.164517	0.0341543	0.0475702	0.0132858
AT2G25060	0.146217	0.300865	0.923607	1.21928	-0.592226	0.185164	0.326187
AT4G34138	-0.06915	-0.199635	-0.157967	-0.565896	0.932364	0.843546	0.566102
AT5G52910	0.941435	0.0227257	0.277335	-0.0589577	0.486766	-0.177334	0.405083
AT5G64970	0.0774982	0.172169	0.196114	0.479737	-0.200225	-0.081609	0.107343
AT2G26920	0.714714	-0.469444	-0.222872	-1.72819	0.585041	-0.352545	-0.673701
AT1G12200	0.100314	-0.431656	-0.212074	-1.2971	0.296049	-0.0163388	-0.569393
AT5G16570	0.204077	0.226504	-0.230106	-0.982748	0.78561	0.351427	-0.423642
AT1G31480	0.528966	-0.518828	-0.355109	-1.64354	0.625735	-0.258341	-0.498982
AT4G32010	0.537866	-0.243073	-0.152262	-1.69787	0.457817	-0.232311	-0.996977
AT5G65390	0.76238	1.56289	-0.418005	1.6998	0.0426983	-1.13769	0.179612
AT1G03190	0.263221	-0.140761	-0.391442	-0.798226	0.408351	-0.246311	-0.249113
AT5G37590	-0.0167857	-0.53593	-0.381082	-0.699821	0.179622	-0.184674	0.0157313
AT3G58100	-0.813508	0.0220375	-0.582457	0.281028	-0.172725	0.0583262	0.0862654
AT4G15990	0.510001	1.05581	0.38842	-0.195429	0.486757	0.365177	-0.764481
AT4G25480	0.128382	-0.309321	0.503759	0.180436	0.278219	0.653597	0.767976
AT4G15620	-1.89018	-0.687265	-0.649862	0.197234	-0.713947	0.526373	0.170553
AT1G36940	0.225785	0.420832	0.0195317	-0.0882001	0.49963	0.293376	-0.00940264
AT1G23890	-0.441791	-0.32536	-0.556124	-0.10987	0.00680075	-0.107531	0.222291
AT5G07790	0.441769	-0.19213	0.174478	-0.798392	0.307918	0.0406268	-0.298344
AT2G18620	0.757197	0.534626	0.748833	0.329252	-0.394239	-0.402603	-0.599613
AT5G65410	-1.65451	-0.208702	-0.87397	0.0683519	-0.206953	0.573583	0.0701004
AT2G43500	0.158835	-0.728266	-0.680856	-1.34832	0.373318	-0.466373	-0.246737
AT1G08160	-0.163154	-0.573484	-0.0453807	-0.436793	-0.16863	-0.0508565	-0.0319393
AT3G08880	0.247203	0.541578	0.384468	0.811134	-0.0746154	0.0626496	0.19494
AT4G30940	-0.319114	-0.43233	-0.464854	-0.111861	0.165275	0.0195358	0.485744
AT2G45760	2.00514	1.25804	2.10971	2.13289	-0.129284	-0.0247153	0.745568
AT5G27450	-0.874135	-0.241725	-0.588227	0.4518	-0.200148	0.0857606	0.493377
AT5G19670	-0.180684	-0.345107	-0.275341	-0.914161	0.143456	0.048799	-0.425597
AT3G18850	-1.32157	-0.790283	-0.945395	-0.435491	0.106073	0.482244	0.460865
AT1G55365	1.45485	1.27139	2.35029	2.6587	-0.867547	0.0278927	0.519766
AT1G80870	-0.0657886	-0.373744	-0.532123	-1.06119	0.173453	-0.292882	-0.513991
AT4G35420	0.0697497	0.0833786	-0.143971	-0.0933482	-0.141543	-0.355263	-0.318269
AT1G02400	0.756184	0.151963	0.319592	0.0354969	0.296127	-0.140465	0.179661
AT3G47570	1.21017	1.01737	1.12689	0.754442	0.454209	0.37093	0.191279
AT5G19100	1.7163	1.86211	1.87971	1.5003	-0.234546	-0.0711319	-0.596358
AT2G46940	-0.110401	0.357099	0.29146	0.626658	-0.419202	-0.0173407	-0.149644
AT3G60290	-0.661825	0.0398357	-0.808067	0.0321796	0.229784	0.0835414	0.222128
AT1G49040	0.4025	-0.17573	-0.33779	-1.3315	0.511513	-0.228777	-0.644252
AT3G12340	0.0995073	-0.296339	-0.666153	-1.39805	0.463739	-0.301921	-0.637966
AT1G79310	3.55644	2.55477	2.73803	1.80427	0.420353	-0.398051	-0.33015
AT5G08240	2.36918	2.50045	2.32507	2.71533	-0.0512357	-0.0953387	0.163637
AT5G41650	-0.203378	0.318261	0.396576	1.2364	-0.376453	0.223501	0.54169
AT3G57980	-0.322105	0.102902	-0.236214	0.0664613	-7.72526e-05	0.0858138	-0.0365176
AT4G16100	0.439633	-0.0136207	-0.286687	-1.05288	0.485953	-0.240367	-0.553309
AT5G58790	-0.201083	0.0555016	-0.474075	-0.0299881	0.212275	-0.0607176	0.126785
AT3G46080	2.58381	2.64527	3.09003	2.60261	-0.424802	0.0814158	-0.467463
AT1G68610	-0.492869	0.230006	0.395439	0.545735	-0.32388	0.564429	-0.00815106
AT5G42200	-0.24639	0.381955	0.357339	0.803937	0.618973	1.2227	1.04095
AT5G11930	0.374042	0.38394	0.606592	1.09989	-0.584617	-0.352067	0.131331
AT1G36680	-0.292045	-0.107037	-0.58181	-0.375729	0.0190947	-0.27067	-0.249597
ATMG01220	-0.611797	-0.143186	-0.00111295	0.772183	-0.301682	0.309002	0.613687
AT4G16900	0.312104	0.0184429	-0.288691	-0.773673	0.566748	-0.0340482	-0.225368
AT5G41580	-0.238587	-0.60672	-0.32822	-1.24638	0.0773792	-0.0122533	-0.562285
AT5G35410	0.301171	-0.0185219	-0.249151	-0.964199	0.486129	-0.0641928	-0.459549
AT5G41150	0.357226	-0.150921	-0.363056	-1.20177	0.518655	-0.201627	-0.532194
AT5G47440	-0.458987	-0.37465	-0.354769	-1.0142	0.040494	0.144711	-0.599056
AT3G10960	0.0456567	0.179385	-0.320826	-0.418618	0.308258	-0.0582246	-0.289745
AT2G01460	0.66887	-0.0934436	-0.306987	-1.02316	0.644167	-0.331689	-0.285554
AT4G15570	0.063742	-0.299674	-0.536541	-1.01977	0.296072	-0.304212	-0.424028
AT3G02840	4.07844	3.18084	3.25512	2.76338	0.590946	-0.232367	0.173484
AT3G54980	0.397355	-0.178586	-0.464214	-1.39334	0.55709	-0.304479	-0.657663
AT5G20930	0.129424	-0.358068	-0.363063	-1.34831	0.449701	-0.0427863	-0.540539
AT5G40340	0.612401	-0.694989	-0.536729	-1.59314	1.32588	0.176751	0.427734
AT5G47400	0.180405	-0.102118	-0.347982	-0.887743	0.357239	-0.171148	-0.428386
AT3G51320	-0.00592278	-0.114642	-0.130734	-0.0166676	-0.187776	-0.312587	-0.0898009
AT5G37530	0.194808	-0.135065	-0.354417	-0.37424	0.00268962	-0.546536	-0.236484
AT5G44980	-0.203313	-0.100591	0.249656	0.768418	-0.235571	0.217399	0.633438
AT1G30040	1.42812	1.54128	0.730085	1.00509	0.324222	-0.373813	-0.211966
AT2G47890	-0.0809295	-0.200414	0.0653229	-0.292004	-0.0712703	0.0749822	-0.16286
AT5G01740	-0.947043	1.1402	-1.25432	-0.23986	0.845956	0.538678	-0.534099
AT4G34360	-0.0665008	0.709595	-0.160295	0.741544	0.34584	0.252045	0.377789
AT3G61850	0.151933	0.0623935	0.0667165	0.419931	0.0426533	-0.0425627	0.400191
AT1G34420	2.91614	2.06909	1.87405	0.693474	0.540637	-0.501462	-0.834981
AT5G07180	-0.508799	-0.518387	-0.19825	-0.737934	-0.152489	0.15806	-0.372037
AT1G55690	-0.24008	-0.666697	-0.513752	-1.39865	0.244002	-0.0296701	-0.487949
AT2G39480	0.410509	-0.231163	-0.170859	-1.61741	0.667679	0.0863108	-0.718571
AT1G32120	-0.0236643	0.122042	0.168093	0.523166	0.0134241	0.205182	0.414547
AT5G13590	0.379269	-0.290024	-0.449749	-1.55437	0.869431	0.0404128	-0.394919
AT4G01920	0.557244	0.11454	0.273175	-0.0717441	-0.00419827	-0.288267	-0.190483
AT1G12330	-0.647492	-0.500776	-0.677762	-1.1154	0.109061	0.0787911	-0.505565
AT1G31935	-0.0405268	-0.00877891	0.0963246	0.660309	0.000978284	0.13783	0.670066
AT3G13440	0.225469	0.0326825	-0.559029	-1.08933	0.470348	-0.31415	-0.65166
AT5G40550	0.112721	-0.0597875	-0.183419	0.12179	0.488662	0.192521	0.67024
AT4G02280	1.64923	0.288845	0.134002	-1.90265	0.572872	-0.942352	-1.61862
AT2G17830	-0.283142	-0.089044	-0.0540213	0.240263	0.37151	0.60063	0.700817
AT4G10570	0.295701	-0.243464	-0.124727	-0.909276	0.233201	-0.187227	-0.43261
AT1G50410	0.57705	-0.283079	-0.232241	-1.68637	0.705192	-0.104099	-0.698094
AT2G20850	0.0525524	-0.512935	-0.295636	-0.931936	0.151498	-0.196691	-0.267503
AT3G03340	0.179923	-0.158672	-0.329794	-1.12231	0.576825	0.0671075	-0.38681
AT1G23880	0.0244209	-0.0150536	0.149894	-0.137737	0.00895866	0.134432	-0.113724
AT5G58690	1.20238	-0.0986345	-0.340692	-1.2304	0.859098	-0.683971	-0.272663
AT5G35450	-0.161657	-0.809261	-1.01425	-1.3848	0.768537	-0.0840591	0.192997
AT1G53350	0.17207	-0.0439968	0.33967	0.000817721	0.291308	0.458908	0.336123
AT4G38545	0.197991	0.0748239	-0.326966	-0.623609	0.239505	-0.285452	-0.458927
AT4G24790	-0.453064	-0.608365	-0.669043	-1.14313	0.19163	-0.0243497	-0.343132
AT1G18270	0.841859	-0.129563	-0.161375	-1.74261	0.821669	-0.181565	-0.791376
AT4G16515	-0.586315	-0.51707	0.254079	1.05557	0.031578	0.871972	1.60422
AT1G12790	-0.0346475	-0.0614807	-0.245537	0.494827	0.168714	-0.0421757	0.725022
AT5G19730	-1.22871	-0.626288	-0.768074	-0.731595	-0.0686598	0.391971	-0.173966
AT1G15150	0.169309	-0.0282757	0.106693	-0.102743	-0.251249	-0.313866	-0.325717
AT5G59070	0.370831	0.570284	0.253992	0.106367	0.204061	0.0872222	-0.259856
AT4G21940	-0.145844	-0.841656	-0.360762	-0.896337	0.379309	0.16439	0.324628
AT5G50170	0.260107	-0.103063	-0.293896	-1.07591	0.498542	-0.0554607	-0.474301
AT4G00310	-0.0333557	-0.12012	-0.124365	0.153487	-0.243729	-0.334738	0.0298778
AT1G80690	-0.884567	-0.416332	-0.372949	0.057969	-0.173229	0.338388	0.301071
AT1G17070	0.349445	-0.102066	-0.394603	-1.30476	0.60001	-0.144038	-0.602684
AT2G07774	-0.529593	0.018448	-0.0150971	0.856074	-0.205986	0.30851	0.63164
AT4G11845	0.0646709	0.0858801	-0.258194	-0.268053	0.569246	0.246382	0.215313
AT1G55350	0.0456277	-0.391814	-0.706777	-1.92015	0.791026	0.0386219	-0.737313
AT3G16030	0.764922	0.00968242	-0.175873	-0.938387	0.415673	-0.525122	-0.532397
AT1G62030	-0.727297	-0.594367	-0.52267	-0.585535	-0.102834	0.101793	-0.094002
AT2G35700	-0.759433	0.104361	-0.235445	0.584034	-0.548681	-0.0246933	-0.0690084
AT3G18485	0.468791	-0.224714	0.391867	-0.249046	-0.146875	-0.223799	-0.171208
AT5G07770	0.894052	0.51928	0.740636	0.170201	0.306179	0.152763	-0.0429
AT2G15780	7.35456	5.6472	6.44628	5.04178	0.548436	-0.359846	-0.056981
AT1G04520	-1.5581	-1.00417	-1.31782	-0.644474	-0.0944958	0.14578	0.265205
AT2G32250	0.108281	-0.318867	-0.488459	-0.985698	0.505871	-0.0908695	-0.16096
AT5G08630	0.60394	-0.186114	-0.133625	-1.23003	0.53349	-0.204075	-0.510421
AT2G01830	0.57934	-0.246939	-0.195043	-1.02021	0.443501	-0.330881	-0.329765
AT4G30980	0.743055	0.206973	0.257933	-0.110535	-0.144011	-0.629133	-0.461519
AT5G61910	0.039088	-0.465072	-0.537015	-1.64701	0.573914	-0.00218932	-0.608021
AT5G19210	-0.574854	-0.28133	-0.362554	-0.264038	-0.146681	0.0656193	-0.129389
AT1G14770	-0.421206	-0.411487	-0.573805	-0.63202	0.299576	0.146978	0.0790435
AT5G08350	0.0569147	0.200091	0.339262	0.191356	0.726568	1.00892	0.717833
AT2G40240	-0.5789	0.11374	-0.574639	-0.0167923	0.17995	0.184211	0.0494174
AT3G25030	-1.14522	-0.296414	-0.866537	-0.208108	0.130925	0.409602	0.219231
AT4G36680	0.344253	0.0116613	0.0689361	-0.505194	0.217847	-0.0574698	-0.299008
AT2G41210	0.344707	-0.336903	-0.618644	-1.11166	0.604323	-0.359027	-0.170428
AT1G51035	0.838281	0.122477	0.489003	0.900268	-0.549625	-0.898903	0.228167
AT2G22790	-0.121994	0.159293	-0.0601281	0.217219	0.0260788	0.0879448	0.0840045
AT5G64320	-0.180957	-0.233078	-0.455206	-0.764917	0.0781655	-0.196083	-0.453674
AT1G20691	-0.134729	0.196223	0.421583	0.842783	-0.455612	0.1007	0.190948
AT1G55525	22.513	20.7632	20.8742	18.6551	0	-0.632814	-2.10803
AT1G20120	0.264406	-0.0977169	-0.185058	0.170892	-0.0238765	-0.473341	0.244733
AT1G76950	0.212721	-0.32926	-0.566814	-1.61841	0.639453	-0.140082	-0.649698
AT1G19190	1.71659	1.00669	0.735226	0.487164	0.357416	-0.623945	-0.162108
AT1G10050	1.03595	0.0500672	-0.108863	-1.6817	0.724758	-0.420056	-1.00701
AT1G56670	-1.22367	-0.638694	-0.735703	-0.594529	-0.0898548	0.398112	-0.0456894
AT5G62500	0.561303	0.542509	0.377814	0.470824	-0.0392747	-0.222763	-0.110959
AT4G03550	0.760072	-0.00351463	-0.327642	-1.38663	0.807064	-0.28065	-0.576052
AT3G45750	0.0417707	-0.436821	-0.481953	-0.983875	0.482703	-0.0410206	-0.0643515
AT3G53350	0.0797676	-0.791701	-0.242307	-1.23366	0.391359	0.0692843	-0.0506017
AT3G07320	0.977603	0.747994	0.776031	0.439682	-0.0335521	-0.235124	-0.341864
AT1G09480	0.701323	0.889758	0.446741	1.00355	-0.434408	-0.68899	-0.320616
AT5G02640	-0.336452	-0.501247	-0.58256	-0.157465	-0.0710434	-0.317152	0.272739
AT3G17900	0.206668	-0.239028	-0.465399	-1.9005	0.565096	-0.106972	-1.09637
AT3G02390	0.610048	0.436885	0.10473	-0.988381	0.459793	-0.0455244	-0.965473
AT4G35930	-0.128367	-0.17214	-0.171386	0.0953056	-0.191602	-0.23462	0.0758438
AT5G18340	0.774394	0.268913	-0.153763	-0.967494	0.557655	-0.370503	-0.678752
AT3G07400	0.157924	-0.238073	-0.572163	-1.70667	0.63611	-0.093977	-0.832488
AT3G53090	0.402511	-0.256402	-0.554683	-1.51067	0.660242	-0.296952	-0.594026
AT5G23155	-0.696319	-0.066396	-1.8985	-0.309479	0.181559	-1.02063	-0.0615249
AT4G00905	0.335278	0.0179234	0.184686	0.389291	-0.240723	-0.391315	0.130644
AT3G23870	1.76262	1.32273	1.08171	1.43387	0.363289	-0.317622	0.474434
AT3G57470	0.0235158	-0.582656	-0.535985	-1.52178	0.572422	0.0129213	-0.366702
AT5G58440	0.205331	-0.191031	-0.620475	-1.67013	0.618748	-0.207057	-0.860349
AT3G51915	22.0007	0	0	0	0	-22.0007	0
AT1G77210	-0.0776917	0.171252	0.285247	0.193153	0.420537	0.783476	0.442439
AT3G16650	0.0967061	-0.208849	-0.522118	-1.45155	0.420432	-0.198392	-0.822268
AT5G02170	2.81273	2.31593	2.28957	1.0681	0.027465	-0.495695	-1.22037
AT1G07810	0.414989	-0.277049	-0.500051	-2.10918	0.651017	-0.264023	-1.18112
AT4G04221	0.732029	0.481543	0.347348	0.282896	-0.159108	-0.543789	-0.357755
AT2G36090	1.16513	0.998958	1.13059	1.17334	0.0603523	0.025811	0.234737
AT2G05810	-0.903702	0.169093	-0.409253	0.684614	-0.374683	0.119766	0.140838
AT1G29300	0.280498	0.552014	0.218937	0.40742	-0.00967687	-0.0712386	-0.154271
AT4G28080	-0.465914	-0.734692	-0.858143	-2.02422	0.622804	0.230574	-0.666728
AT2G24050	0.0847013	-0.386728	-0.520701	-1.75455	0.171422	-0.43398	-1.1964
AT5G28530	-0.077865	-0.116273	-0.320038	-0.510428	0.376661	0.134488	-0.0174942
AT2G33540	0.0990751	-0.55293	-0.618728	-1.89926	0.652497	-0.0653066	-0.693832
AT5G41180	1.18049	0.557165	0.900734	0.433188	0.00393784	-0.27582	-0.120039
AT1G76410	-0.195056	0.238918	-0.0303717	0.484888	0.0087359	0.17342	0.254706
AT3G48360	0.259143	1.64782	0.860678	1.54378	1.30405	1.90558	1.2
AT3G60240	0.357357	-0.240354	-0.443477	-1.63838	0.764405	-0.0364289	-0.63362
AT1G80170	-0.355349	-0.0872039	-0.263548	0.0647128	-0.0432408	0.0485594	0.108676
AT4G27430	-0.324756	-1.09276	-0.827334	-2.63824	0.697895	0.195316	-0.847584
AT4G27360	-1.39431	-0.653044	-1.02369	-0.782479	-0.154061	0.216565	-0.283496
AT3G05670	0.368156	-0.428085	-0.540337	-1.78786	0.891502	-0.0169919	-0.468276
AT3G04810	0.252411	-0.452846	-0.730152	-1.89289	0.567391	-0.415171	-0.872654
AT5G45610	0.149776	-0.281295	-0.184092	-0.500275	0.110167	-0.223701	-0.108814
AT2G42350	3.45072	2.95537	3.55772	3.12841	-0.294638	-0.187639	-0.121592
AT4G21900	0.0729433	-0.240108	-0.678563	-0.980163	0.249911	-0.501595	-0.490144
AT4G17490	1.53622	1.4915	0.972064	1.24918	0.976887	0.412735	0.734564
AT3G54320	0.0788478	-0.0526222	0.052849	-0.368604	-0.102534	-0.128533	-0.418516
AT4G20190	5.16117	3.91497	4.29501	3.06081	0.0233839	-0.842772	-0.830778
AT3G50800	0.348809	1.26263	0.512641	1.0776	0.102501	0.266333	-0.0825326
AT5G63690	0.304588	0.198603	-0.00583613	0.432312	-0.277658	-0.588082	-0.0439493
AT2G12550	1.0044	0.158335	0.289386	-0.494347	0.126285	-0.588729	-0.526397
AT5G52830	0.23008	-0.292767	-0.116121	0.592575	-0.159194	-0.505394	0.726148
AT3G13700	-0.392228	0.0307283	-0.0833748	0.400924	-0.197348	0.111505	0.172848
AT3G62240	0.339259	-0.443776	-0.296257	-1.92972	0.646533	0.0110171	-0.839408
AT5G02460	0.108593	0.217404	0.172274	0.163553	-0.491984	-0.428303	-0.545835
AT3G48050	0.415271	-0.310812	-0.448542	-2.02245	0.766161	-0.097652	-0.945476
AT3G05680	-0.0342775	-0.4367	-0.581766	-1.56122	0.560792	0.0133039	-0.563732
AT3G04950	-0.408243	-0.218113	-0.499516	0.0166118	-0.041444	-0.132717	0.193281
AT3G29670	-0.601656	-0.569469	-0.217763	-1.34729	0.256627	0.64052	-0.521196
AT1G30240	0.165782	-0.195404	-0.756642	-0.920787	0.329381	-0.593042	-0.396002
AT3G19780	0.200748	-0.306873	-0.671411	-1.45916	0.586981	-0.285177	-0.565311
AT3G47700	0.381459	-0.0714276	0.0139003	-1.08862	0.147313	-0.220245	-0.869881
AT4G11370	0.404072	0.3239	0.438976	0.876605	0.577788	0.612692	1.13049
AT1G29820	-0.0197613	-0.234318	-0.41122	-0.768605	0.26082	-0.130639	-0.273468
AT3G58930	-0.552735	0.0101079	-0.417423	0.0853788	0.0710486	0.20636	0.146319
AT1G48598	0.396713	0.526582	-1.08788	-1.08698	0.945017	-0.53958	-0.668546
AT4G22530	0.635577	0.454942	0.321861	0.00445011	0.307713	-0.00600286	-0.142778
AT5G27650	0.0403451	-0.468598	-0.462604	-2.12361	0.560852	0.0579024	-1.09416
AT3G16130	-0.107184	0.0080414	-0.151225	0.27176	-0.0482298	-0.0922706	0.215489
AT2G43440	-0.0360549	-0.161569	0.155782	0.395888	-0.678776	-0.48694	-0.12132
AT5G40920	0.472989	0.179396	0.257558	-0.533437	0.235317	0.0198857	-0.477516
AT2G42290	-0.204955	-0.250716	-0.286667	-0.54721	-0.0686541	-0.150365	-0.365148
AT4G35500	1.60658	0.987458	1.01194	0.884485	0.12262	-0.47202	0.019647
AT1G50360	0.683964	-0.0393543	-0.04404	-0.734717	0.494448	-0.233556	-0.200915
AT5G22760	0.371502	-0.447036	-0.518744	-1.8234	0.742943	-0.147303	-0.633416
AT2G20815	0.293673	0.131049	-0.297735	-0.327991	0.16135	-0.430059	-0.29769
AT3G11600	-0.357872	-0.0836639	-0.650816	-0.143146	0.4715	0.178556	0.412018
AT5G43130	0.0138493	-0.543247	-0.636376	-1.52845	0.675026	0.0248001	-0.310181
AT1G24400	-0.261457	-0.141446	-0.441046	-0.489779	0.111468	-0.0681208	-0.236865
AT5G47960	2.1037	2.11463	2.19158	2.34757	0.0792391	0.167116	0.312175
AT5G40400	-0.466368	-0.175417	-0.459326	-0.107759	0.0493747	0.0564169	0.117033
AT4G36290	0.31884	-0.34987	-0.53944	-1.55534	0.453279	-0.405	-0.752195
AT1G09750	-0.842894	-0.196121	-0.928561	-0.294774	0.0294655	-0.0562019	-0.0691874
AT3G58850	-1.13152	-0.144032	-1.26793	-0.00972956	0.288219	0.15181	0.422522
AT1G07119	-0.578632	-0.349652	-0.0227117	0.118045	-0.609449	-0.0535291	-0.141752
AT3G58110	0.610663	-0.340413	-0.694256	-1.87122	0.960151	-0.344768	-0.570653
AT5G01830	1.09791	1.06913	0.655101	0.674877	0.0797663	-0.363046	-0.314483
AT5G13870	-0.0489926	0.0125424	-0.561132	-0.29059	0.29081	-0.221329	-0.0123219
AT4G21310	0.355353	0.158833	0.0442805	0.893199	-0.124321	-0.435393	0.610045
AT2G28870	-0.760475	-0.397774	-0.346453	0.219415	-0.102731	0.311292	0.514458
AT3G57140	-0.128527	0.454348	0.0580106	0.603688	-0.106793	0.0797447	0.042547
AT3G13780	-0.0299869	-0.201761	-0.533866	-0.897177	0.504431	0.000551798	-0.190986
AT4G01910	0.269456	-0.0548164	0.203081	0.00964444	-0.0351797	-0.101555	0.0292811
AT3G53190	-0.155792	0.155715	-0.451643	-0.0610947	0.108999	-0.186852	-0.107811
AT3G60390	-0.95428	-0.539047	-0.357926	-0.827187	0.365306	0.96166	0.0771664
AT4G22350	-0.0211608	-0.327708	-0.551871	-0.932042	0.292494	-0.238217	-0.311841
AT2G25170	0.300098	-0.639772	-0.679143	-2.0691	0.980227	0.000985761	-0.449105
AT4G37850	23.6193	22.7675	22.5208	20.6105	0	-0.0925155	-2.15703
AT4G14830	-0.442738	-0.101046	0.103239	0.27273	-0.0761706	0.469806	0.297605
AT3G22410	0.899403	0.953826	1.38186	0.954018	-0.518262	-0.0358032	-0.51807
AT4G16280	0.362264	0.0741808	-0.305682	-0.667021	0.307753	-0.360194	-0.433449
AT1G11350	-0.153816	-0.343453	-0.636447	-1.92502	0.666256	0.183625	-0.915313
AT5G09630	0.131062	-0.0280012	0.5952	0.435631	0.0332379	0.497375	0.49687
AT4G13505	1.27316	1.69903	0.401049	0.791537	0.837123	-0.0349909	-0.0703666
AT4G26255	1.88604	1.3541	2.64487	2.01684	-0.825211	-0.066385	-0.162471
AT2G24520	0.249746	-0.507008	-0.360347	-1.46991	0.409051	-0.201041	-0.553846
AT4G16480	0.313947	-0.116797	0.00494758	-0.395765	0.0645661	-0.244433	-0.214402
AT5G42360	0.128924	-0.0843696	-0.131843	-0.740147	0.526063	0.265296	-0.129714
AT3G62510	0.447561	0.718378	-0.554436	-0.625572	0.632038	-0.369959	-0.711912
AT2G38260	0.1586	-0.0917063	-0.145129	-0.381805	0.212269	-0.0914592	-0.0778289
AT1G45180	0.0914771	-0.00959798	-0.334772	-0.553337	0.322828	-0.103421	-0.220911
AT3G48500	-0.108896	-0.590506	-0.974736	-1.75547	0.777691	-0.088149	-0.387272
AT5G38780	0.45479	-0.157339	-0.455322	0.31823	0.117436	-0.792676	0.593005
AT2G39380	0.44302	0.19092	0.176547	-0.257533	0.00785052	-0.258622	-0.440602
AT1G17170	2.47726	1.00213	1.28329	1.27076	-0.308194	-1.50217	-0.0395651
AT1G27850	0.19775	-0.526868	-0.418998	-1.77461	0.621174	0.00442487	-0.626573
AT5G54520	0.0925654	-0.136729	-0.277468	-0.927829	0.230198	-0.139835	-0.560902
AT1G80070	0.20992	-0.558894	-0.901327	-2.53257	0.962911	-0.148335	-1.01076
AT5G56880	4.03201	3.6114	4.93838	3.74916	-0.259376	0.647	-0.121614
AT5G58480	-0.593658	-0.444674	-0.527912	-0.702176	0.186473	0.252219	-0.0710289
AT2G02150	-0.316889	-0.0355708	-0.443708	-0.001288	0.235366	0.108547	0.269648
AT3G56890	-0.700866	-0.386413	-0.748478	-0.0228181	0.371436	0.323825	0.735031
AT4G24200	0.797579	-0.12981	-0.168981	-1.81583	0.630502	-0.336058	-1.05552
AT2G15680	0.363213	0.829473	0.17057	1.01477	0.0749189	-0.117724	0.260212
AT2G16380	-0.321087	-0.449116	-0.779707	-1.3258	0.697864	0.239244	-0.178817
AT3G18510	-0.272253	0.0294886	0.367097	0.802889	-0.279821	0.359529	0.493579
AT1G12420	1.06352	0.289379	0.583908	-0.553177	0.477833	-0.00177962	-0.364723
AT5G45475	1.15489	0.426244	0.378059	0.724803	0.459633	-0.317201	0.758191
AT2G18260	-0.524673	-0.303904	-0.432283	-0.0749674	0.290714	0.383104	0.519651
AT5G49560	-0.417572	-0.0348322	-0.338671	0.340482	-0.378575	-0.299674	-0.00326106
AT5G27750	-0.261479	-0.244544	-0.137152	-0.12633	0.0578868	0.182214	0.176101
AT4G14920	0.00553757	-0.515145	-0.843969	-1.46334	0.698344	-0.151163	-0.249854
AT5G50330	0.852483	0.264641	0.456865	0.315366	0.196765	-0.198854	0.24749
AT5G37550	-0.340644	-0.370774	-0.262252	-0.453929	0.0359268	0.11432	-0.0472284
AT5G28442	-0.147829	0.0115501	-0.0193013	0.767655	-0.364997	-0.23647	0.391108
AT2G43310	0.152484	0.366615	0.286261	0.650447	-0.0372283	0.0965483	0.246603
AT1G61170	-0.110676	0.358074	-0.116896	-0.0461763	0.396304	0.390084	-0.00794695
AT5G13480	0.054953	-0.184028	-0.511175	-0.989697	0.408465	-0.157664	-0.397204
AT2G48160	0.244019	-0.393427	-0.620453	-2.01261	0.720405	-0.144068	-0.898782
AT4G29730	0.179321	-0.035188	-0.367214	-0.513072	0.111779	-0.434756	-0.366105
AT3G23790	0.868519	-0.110574	-0.409704	-0.813876	0.754648	-0.523575	0.0513453
AT2G29720	1.09656	1.32161	1.09331	1.63491	-0.163719	-0.166973	0.149588
AT5G60870	-0.353462	-0.00753817	-0.264939	0.393319	-0.276741	-0.188219	0.124116
AT3G27970	-0.134139	-0.634007	1.01448	1.23819	-2.17153	-1.02291	-0.299328
AT3G22380	0.205407	-0.535735	-0.549176	-2.8005	1.01268	0.258099	-1.25208
AT1G17590	0.478111	0.084827	0.230336	0.364367	0.237889	-0.00988598	0.517429
AT4G18425	0.33277	0.127579	0.0556968	0.642192	-0.0149311	-0.292004	0.499683
AT2G20550	-0.518178	-0.580196	-0.953607	-0.935954	0.477888	0.042458	0.12213
AT2G45930	2.74744	2.05787	2.23696	1.85881	0.130859	-0.379628	-0.0682026
AT2G42700	0.474173	-0.250149	-0.158693	-1.27654	0.359781	-0.273085	-0.666608
AT1G53540	2.39226	1.87093	4.18938	1.63523	0.143181	1.94029	-0.0925252
AT1G13740	-0.0361035	-0.262	-0.321525	-0.190649	0.111067	-0.174354	0.182418
AT4G25730	0.503497	-0.121246	-0.64266	-1.90185	1.07762	-0.0685405	-0.702989
AT3G10690	-0.407263	-0.530016	-0.485043	-0.797499	0.140312	0.0625323	-0.127171
AT2G28660	0.156423	0.672785	0.521088	0.725731	-0.194142	0.170523	-0.141196
AT3G22430	0.516132	-0.206017	-0.224125	-1.15061	0.49274	-0.247517	-0.451856
AT1G78050	-0.347481	-0.329786	-0.349478	-0.229685	0.233591	0.231595	0.333692
AT4G05040	-0.0325362	-0.399991	-0.633202	-1.39002	0.406583	-0.194082	-0.583447
AT2G01660	-0.125842	0.16281	-0.0826018	0.135037	-0.194785	-0.151545	-0.222558
AT2G46890	-0.44398	0.126117	-0.35	0.710674	-0.114457	-0.0204775	0.4701
AT1G21700	0.271139	-0.354353	-0.455341	-1.70925	0.628643	-0.0978375	-0.726254
AT3G53690	0.321753	0.602987	0.021444	0.516965	-0.0428574	-0.343166	-0.12888
AT5G08470	0.158487	-0.180965	-0.351697	-1.48869	0.513179	0.00299525	-0.794541
AT5G09580	0.0184808	0.248098	-0.027634	0.43129	-0.0338632	-0.0799779	0.149329
AT3G62200	0.468474	0.0534014	-0.324226	-1.72788	0.56196	-0.23074	-1.21932
AT2G17880	-0.30111	-0.0482689	0.171511	-0.0686464	0.301425	0.774046	0.281048
AT1G73400	-0.271289	-0.429334	-0.31925	-0.526122	0.409847	0.361887	0.31306
AT5G07970	0.569174	-0.338757	-0.561745	-1.8226	0.546574	-0.584345	-0.937274
AT3G11240	0.130733	-0.220917	-0.192349	-1.05651	0.379945	0.0568637	-0.455648
AT4G26795	-0.308115	-0.0286799	-0.642724	-0.148332	0.347385	0.0127761	0.227733
AT1G17110	0.711713	-0.42473	-0.540428	-2.02072	1.02416	-0.227979	-0.571829
AT1G36160	0.405872	-0.478943	-0.601811	-2.48529	0.847509	-0.160174	-1.15883
AT3G04340	-0.128965	-0.760021	-0.929021	-2.24112	0.820972	0.0209155	-0.660128
AT3G56408	0.241135	-0.546265	-0.615552	-1.10663	0.0485065	-0.80818	-0.511859
AT4G37970	0.254614	-0.306073	-0.0186714	-0.347421	-0.255438	-0.528723	-0.296786
AT5G64905	4.40868	3.58292	5.86106	5.72522	-0.614517	0.837868	1.52779
AT5G18360	0.378051	0.162348	0.323764	-0.290645	0.278801	0.224514	-0.174192
AT1G31870	0.256979	-0.467976	-0.68248	-1.81082	0.720394	-0.219065	-0.622451
AT2G19670	-0.826716	-0.582859	-0.741886	-0.344066	0.300334	0.385164	0.539127
AT2G33815	-0.27434	0.374074	-0.143099	-0.289978	0.338641	0.469882	-0.325411
AT1G11960	0.524986	0.00941101	-0.369045	-0.995211	0.434075	-0.459956	-0.570546
AT1G51890	4.39439	2.85973	4.59919	3.32959	-0.153875	0.0509255	0.31599
AT5G22520	2.2705	2.65568	2.58432	2.93997	0.200547	0.514366	0.484842
AT5G47750	0.260276	-0.173608	-0.542407	-1.50569	0.577463	-0.22522	-0.754619
AT1G26620	0.499508	-0.34959	-0.274246	-0.989081	0.484599	-0.289155	-0.154892
AT2G38570	-0.504039	-0.0761609	-0.175126	0.307924	-0.113357	0.215555	0.270727
AT1G63420	-0.0809653	-0.47934	-0.297419	-0.201821	-0.108477	-0.324931	0.169041
AT5G43620	0.47417	0.665348	0.603216	0.712207	0.172086	0.301132	0.218945
AT2G15890	-0.567003	-0.396079	0.158614	0.231451	1.2669	1.99252	1.89443
AT1G18265	-0.788209	-0.323572	-0.630167	0.311548	0.114013	0.272054	0.749134
AT1G20840	0.876308	0.0826619	-0.526639	-1.80507	0.957919	-0.445027	-0.92981
AT1G65480	1.77603	-0.351747	1.42726	1.987	0.287631	-0.0611384	2.62638
AT5G45840	0.0528886	0.141672	-0.259337	0.303985	0.205223	-0.107003	0.367536
AT5G17930	0.129007	-0.430086	-0.65932	-1.36063	0.710473	-0.0778544	-0.22007
AT5G09930	0.340054	-0.341245	-0.819403	-0.855613	0.483672	-0.675785	-0.0306961
AT2G29410	-0.182262	-0.293455	-0.42947	-0.318869	0.215844	-0.0313628	0.190431
AT1G18870	0.232054	-0.277908	0.276401	-1.22853	0.10973	0.154077	-0.840895
AT3G56480	0.33192	0.181128	-0.353382	-1.03483	0.517223	-0.168079	-0.69874
ATMG00020	-0.0538297	-0.122914	-0.573125	-1.03589	0.4406	-0.0786946	-0.472375
AT4G35430	0.0111356	-0.0309536	-0.831825	-1.7057	0.715368	-0.127593	-0.95938
AT5G62580	-0.354877	-0.391421	-0.487474	-1.10716	0.0552486	-0.0773493	-0.66049
AT4G21440	1.03876	0.223731	1.26309	0.303279	-0.17465	0.0496786	-0.095102
AT2G16920	0.556515	-0.296126	-0.46316	-1.66802	0.762549	-0.257125	-0.609345
AT1G06475	0.799275	0.897653	1.45996	1.50437	-0.174846	0.485843	0.431871
AT4G11670	0.704046	0.175945	0.128543	-0.760813	0.348802	-0.226701	-0.587956
AT4G32890	-0.794934	-0.110722	-0.272143	0.347203	-0.332203	0.190587	0.125722
AT3G05660	1.12642	0.879011	0.787032	0.248559	-0.287511	-0.626897	-0.917962
AT3G08000	-0.572371	0.0808252	-0.11013	0.368378	-0.19561	0.266631	0.0919426
AT5G06810	0.261347	0.27956	0.0825565	0.18602	0.12383	-0.0549597	0.0302909
AT5G18440	0.303961	-0.427363	-0.7939	-1.25039	0.71633	-0.381532	-0.106701
AT3G13560	-0.108704	-0.0566933	-0.197173	-0.624142	0.0046148	-0.0838538	-0.562834
AT4G38300	-0.00799629	-0.0536038	-0.198739	-0.591852	-0.117074	-0.307817	-0.655323
AT3G59430	0.156206	-0.128059	-0.409526	-0.69561	0.30609	-0.259643	-0.261461
AT2G32030	2.41635	2.45573	2.26195	2.54714	0.00781351	-0.146586	0.0992203
AT1G70740	0.495685	-0.0310136	0.0245876	-1.1959	0.227781	-0.243317	-0.937105
AT3G59330	0.0819561	0.0262298	-0.39584	-0.112765	0.251601	-0.226195	0.112607
AT5G40540	-0.229846	0.396233	0.45647	1.22201	-0.451661	0.234655	0.374114
AT5G46280	-0.124595	-0.340799	-0.295066	-0.843906	0.381286	0.210815	-0.121822
AT3G22070	0.0843692	0.257155	0.20496	0.342877	-0.103832	0.0167593	-0.0181096
AT2G19990	3.79416	3.55997	1.63409	1.22816	-0.063445	-2.22351	-2.39525
AT5G17580	-0.245998	-0.634411	-0.556547	-0.55667	0.28397	-0.0265794	0.361711
AT5G57070	-0.0147524	0.183483	-0.230351	0.151275	0.0279321	-0.187666	-0.00427607
AT3G50340	0.173169	0.167842	0.243189	-0.242654	0.0826218	0.152642	-0.327874
AT2G16640	0.0816964	-0.357089	-0.497754	-1.31116	0.669963	0.0905126	-0.284103
AT1G49430	-1.18049	-0.571526	-1.18456	-0.727275	-0.0305847	-0.03465	-0.186334
AT1G25390	0.685828	-0.476253	-0.449175	-1.83542	0.741599	-0.393404	-0.617572
AT5G06300	0.33562	0.523165	-0.0989706	0.180673	0.331469	-0.103122	-0.0110229
AT5G44306	1.07556	-0.587888	0.0521699	2.61971	-0.702055	-1.72544	2.50555
AT2G32410	0.0107984	-0.148066	-0.372853	-0.432112	0.167121	-0.216531	-0.116925
AT2G22650	-0.303562	0.0389517	-0.250666	0.101463	-0.0601611	-0.00726507	0.00235046
AT5G55570	-1.8627	-0.498143	-1.59241	-0.539501	0.377814	0.648111	0.336455
AT3G09650	-0.203987	-0.483654	-0.764071	-2.15384	0.513713	-0.0463709	-1.15647
AT2G38460	-0.386269	-0.354628	-0.626745	-0.180426	-0.0222735	-0.26275	0.151929
AT3G50590	0.450229	-0.39557	-0.551196	-2.39923	0.961395	-0.0400298	-1.04226
AT1G03960	0.116754	-0.133601	-0.0814941	-0.286139	0.0209221	-0.177326	-0.131616
AT5G27970	0.318356	-0.26979	-0.297605	-1.51378	0.415068	-0.200892	-0.828926
AT5G56780	-0.441287	-0.205801	-0.472734	-0.665071	0.44546	0.414013	-0.0138109
AT3G19360	0.0946953	0.266543	-0.0524796	0.152075	0.285379	0.138204	0.170911
AT1G19835	0.426818	-0.926638	-0.949659	-2.20846	1.07548	-0.300995	-0.206336
AT1G71020	-0.0926415	-0.588798	-0.235654	-1.38318	0.599785	0.456772	-0.194597
AT3G52900	-0.467845	-0.592126	-0.17194	-0.373084	0.0102087	0.306114	0.22925
AT5G08270	-0.311894	-0.414906	-0.427075	-0.732482	0.0654637	-0.0497181	-0.252112
AT5G17270	0.335313	-0.258228	-0.585568	-1.51665	0.799108	-0.121773	-0.459314
AT5G65120	-0.171071	-0.125523	0.0445873	0.450382	-0.0504625	0.165196	0.525443
AT5G10330	-0.322371	-0.23451	0.0237731	0.104312	-0.181591	0.164554	0.157231
AT5G65560	0.277478	-0.060811	-0.080517	-0.497966	0.273868	-0.0841274	-0.163287
AT2G18010	-0.303436	-0.184925	0.0426786	0.498404	-0.118449	0.227666	0.564881
AT2G21100	2.99901	1.47092	4.00257	2.2421	-1.82299	-0.819427	-1.0518
AT5G61380	0.938214	0.403448	0.848642	0.28008	0.133667	0.044095	0.0102994
AT4G15810	-0.0598941	-0.654248	-0.648166	-1.35964	0.604171	0.0158987	-0.101223
AT3G63200	-1.42437	-0.340281	-0.612597	0.244647	-0.11906	0.692716	0.465868
AT3G63290	0.183613	-0.198917	-0.157483	-0.504297	-0.0848091	-0.425905	-0.390189
AT4G28320	0.268177	0.0710443	0.0341553	0.0316399	0.155311	-0.0787106	0.115906
AT1G67530	0.479407	-0.434057	-0.335476	-1.82133	0.593428	-0.221455	-0.793848
[truncated: 15,155 more rows]
